# Supplementary material for: Investigating microRNA Profiles in Prostate Cancer Bone Metastases and Functional Effects of microRNA-23c and microRNA-4328
Source: MDPI journal article supplement (doi:10.3390/cancers15092437), 2023-04-24
Supplement: s1 [file s1]

Figure S2.

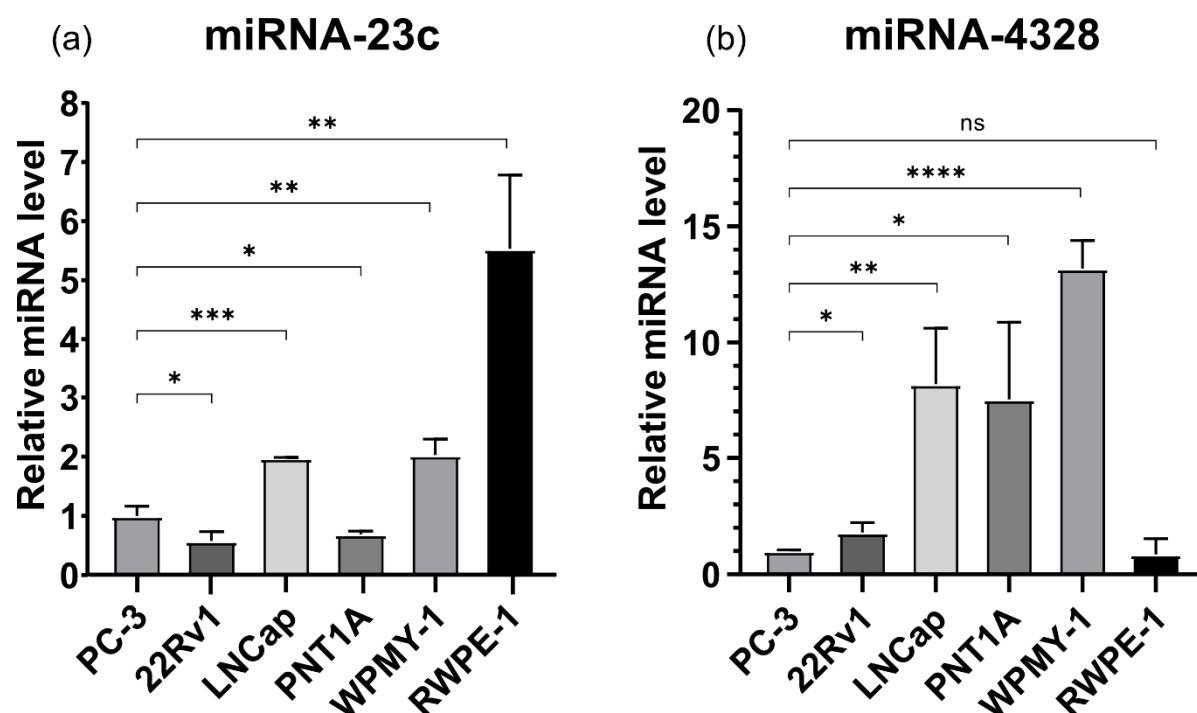

**Figure S2. Endogenous levels of miRNA-23c and miRNA-4328 in different prostate and prostate cancer cell lines.** Relative miRNA-23c (a) and miRNA-4328 (b) levels in the prostate cell lines RWPE-1, PNT1A, WPMY-1, and in the prostate cancer cell lines LNCaP, 22Rv1 and PC-3 are shown. Levels of miRNA were determined with RT-qPCR and are displayed in relation to levels in the PC-3 cell line ( $n=3$  per cell line). \* $p < 0.05$ , \*\* $p < 0.01$ , \*\*\* $p < 0.001$ , \*\*\*\* $p < 0.0001$ , ns  $p > 0.05$  (unpaired  $t$ -test).
