# Supplementary material for: Investigating microRNA Profiles in Prostate Cancer Bone Metastases and Functional Effects of microRNA-23c and microRNA-4328
Source: MDPI journal article supplement (doi:10.3390/cancers15092437), 2023-04-24
Supplement: s1 [file s1]

**Figure S1.**

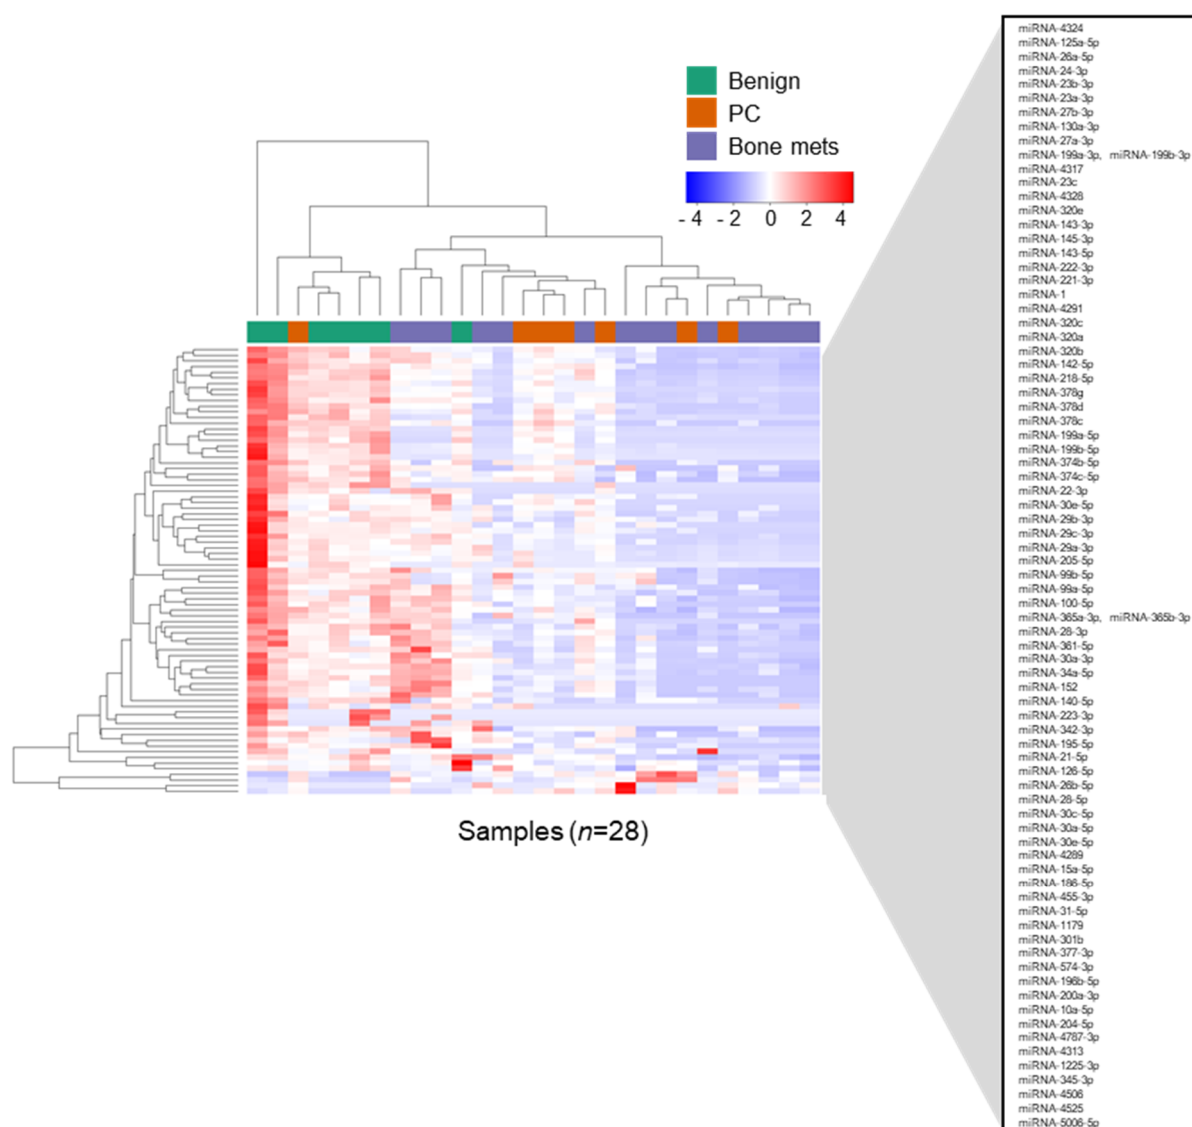

**Figure S1. Differentially expressed microRNAs (miRNAs) in bone metastatic prostate cancer.** Heatmap demonstrating unsupervised hierarchical clustering of biopsies ( $n = 28$ ) and microRNAs (miRNAs) ( $n = 79$ ) differing significantly ( $p < 0.05$ ) in castration resistant prostate cancer bone metastases (bone mets) ( $n = 14$ ) and localized prostate cancer (PC) ( $n = 7$ ) as compared to benign prostate tissue (benign) ( $n = 7$ ).
