# Supplementary material for: Investigating microRNA Profiles in Prostate Cancer Bone Metastases and Functional Effects of microRNA-23c and microRNA-4328
Source: MDPI journal article supplement (doi:10.3390/cancers15092437), 2023-04-24
Supplement: s1 [file s1]

**Figure 6S.**

**(a) 22Rv1**

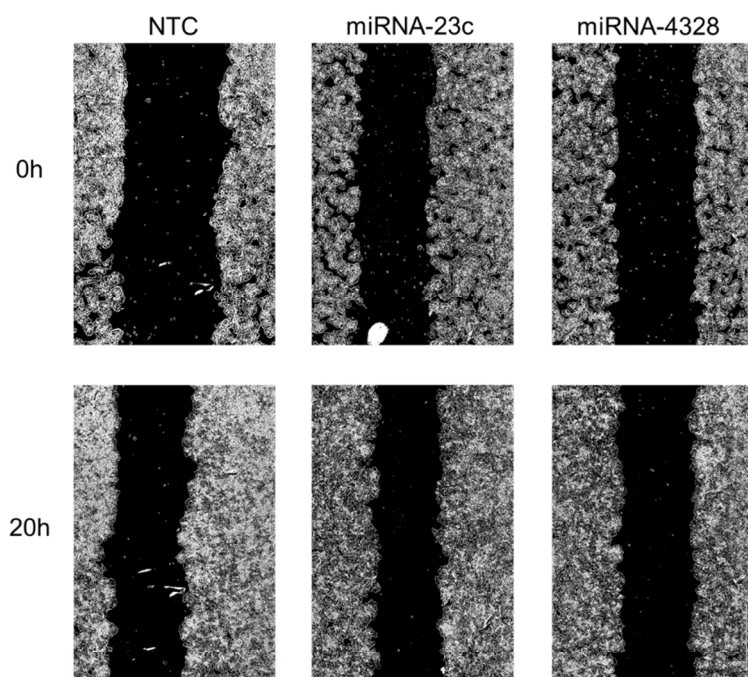

**(b) PC-3**

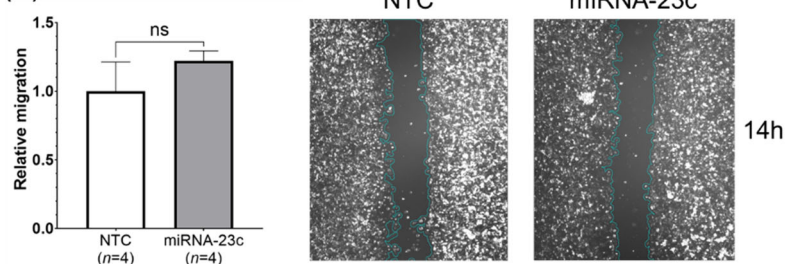

**(c) PC-3**

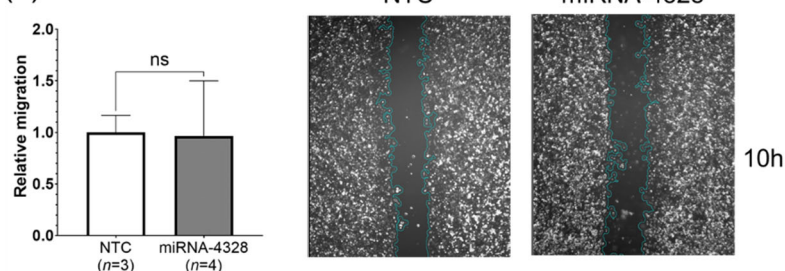

**Figure S6. Wound healing assay of 22Rv1 and PC-3 cells overexpressing miRNA-23c or miRNA-4328.** (a) Examples of wounds of 22Rv1 cells at baseline (0h) and after 20h. Examples of wounds of PC-3 cells overexpressing miRNA-23c (b) and miRNA-4328 (c). Graphs display the relative difference in wound area as compared to 0h. The wound area was quantified in Image J using a plugin for scratch wound healing assays. ns:  $p > 0.05$ ,  $n = 3-4$ .
