# Supplementary material for: Investigating microRNA Profiles in Prostate Cancer Bone Metastases and Functional Effects of microRNA-23c and microRNA-4328
Source: MDPI journal article supplement (doi:10.3390/cancers15092437), 2023-04-24
Supplement: s1 [file s1]

**Figure S5.**

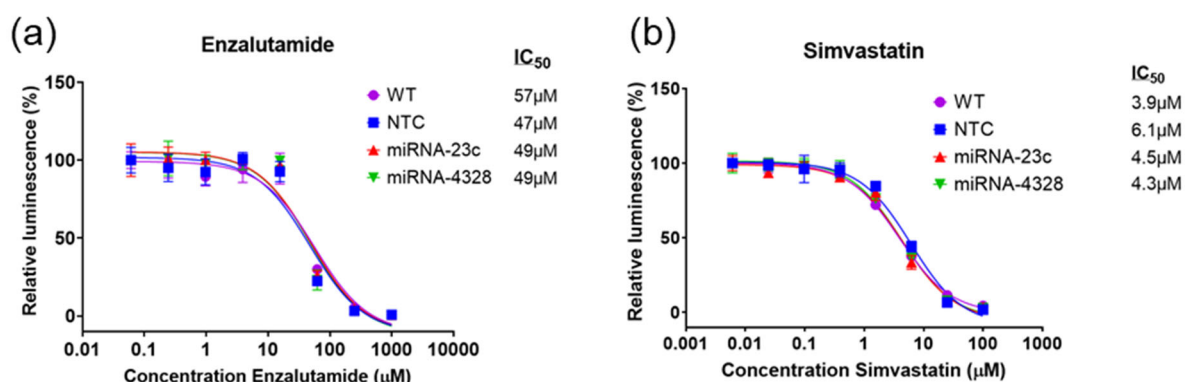

**Figure S5. Cell response to Enzalutamide (a) and Simvastatin (b) after overexpression of miRNA-23c or miRNA-4328 in the 22Rv1 cell line.** The half maximal inhibitory concentrations (IC<sub>50</sub>) were determined by seeding cells in triplicates and growing them in 8 different drug concentrations over 96h. The CellTiter-Glo® Luminescent Cell Viability reagent was used to obtain the relative cell numbers at 96h, based on the quantity of ATP produced, analyzed as an indicator of metabolically active cells (CellTiter-Glo® Luminescent Cell Viability Assay).
