# Supplementary material for: Investigating microRNA Profiles in Prostate Cancer Bone Metastases and Functional Effects of microRNA-23c and microRNA-4328
Source: MDPI journal article supplement (doi:10.3390/cancers15092437), 2023-04-24
Supplement: s1 [file s1]

**Figure S3.**

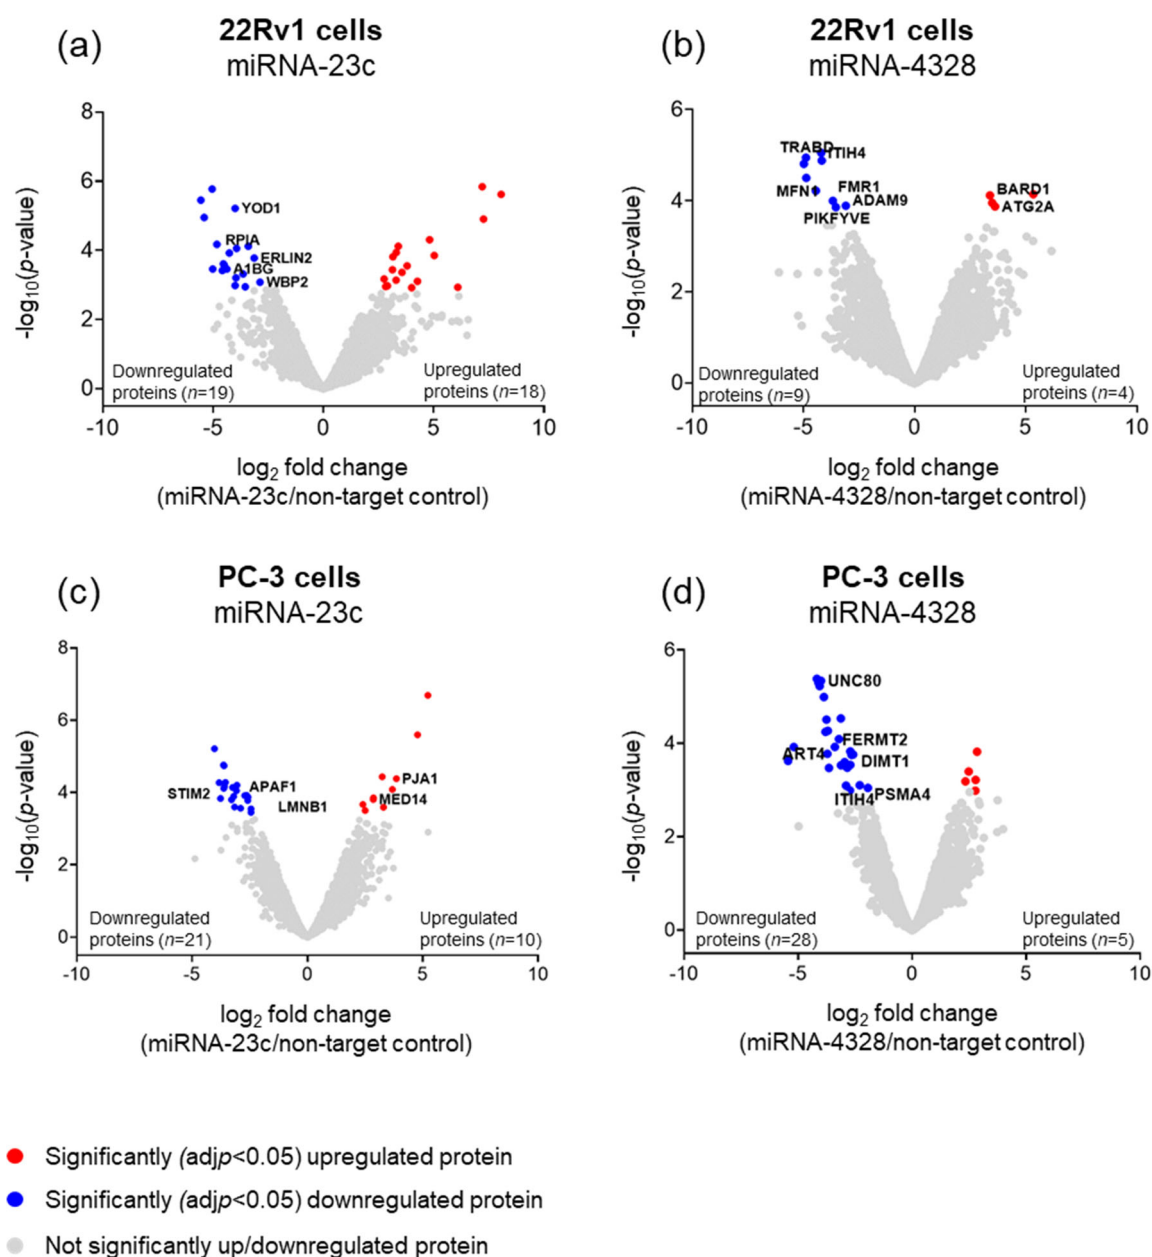

**Figure S3. Volcano plots highlighting differentially expressed proteins following overexpression of miRNA-23c (a, c) or miRNA-4328 (b, d) in the 22Rv1 (a, b) and PC-3 (c, d) cell lines.** Red and blue dots symbolize significantly up- and down-regulated proteins, respectively ( $\text{adj}p < 0.05$ ,  $n = 3$  single cell clones per cell line). Abbreviations indicate proteins being predicted as targets for the miRNA in the TargetScan ([targetscan.org](http://targetscan.org)) database.
