# Supplementary material for: Investigating microRNA Profiles in Prostate Cancer Bone Metastases and Functional Effects of microRNA-23c and microRNA-4328
Source: MDPI journal article supplement (doi:10.3390/cancers15092437), 2023-04-24
Supplement: s1 [file s1]

**Figure S7.**

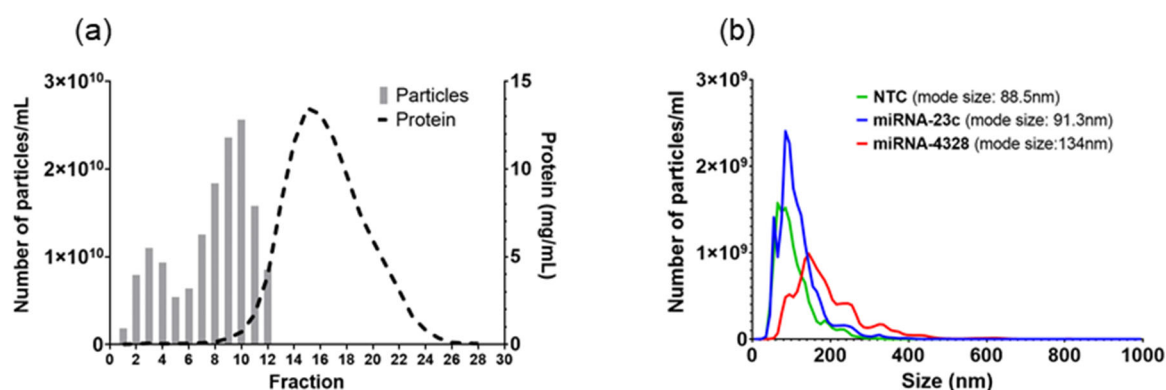

**Figure S7. Particle distribution and protein concentration of sample fractions obtained by size-exclusion chromatography of conditioned cell culture medium from PC-3 cells following miRNA-23c or -4328 overexpression.** (a) Protein concentrations for all fractions ( $n = 28$ ) and particle concentrations for the first 12 fractions of conditioned cell culture medium from PC-3 cells with stable overexpression of miRNA-23c, shown as a representative example for the samples shown in B. (b) Particle concentration and size of pooled protein-free fractions (fractions 2-10) from PC-3 cells with stable overexpression of miRNA-23c, miRNA-4328, or NTC. Particles were analyzed by the nanoparticle tracking system NanoSight NS300 and proteins by A280 absorbance.
