# Supplementary material for: Investigating microRNA Profiles in Prostate Cancer Bone Metastases and Functional Effects of microRNA-23c and microRNA-4328
Source: MDPI journal article supplement (doi:10.3390/cancers15092437), 2023-04-24
Supplement: s1 [file s1]

**Figure S4.**

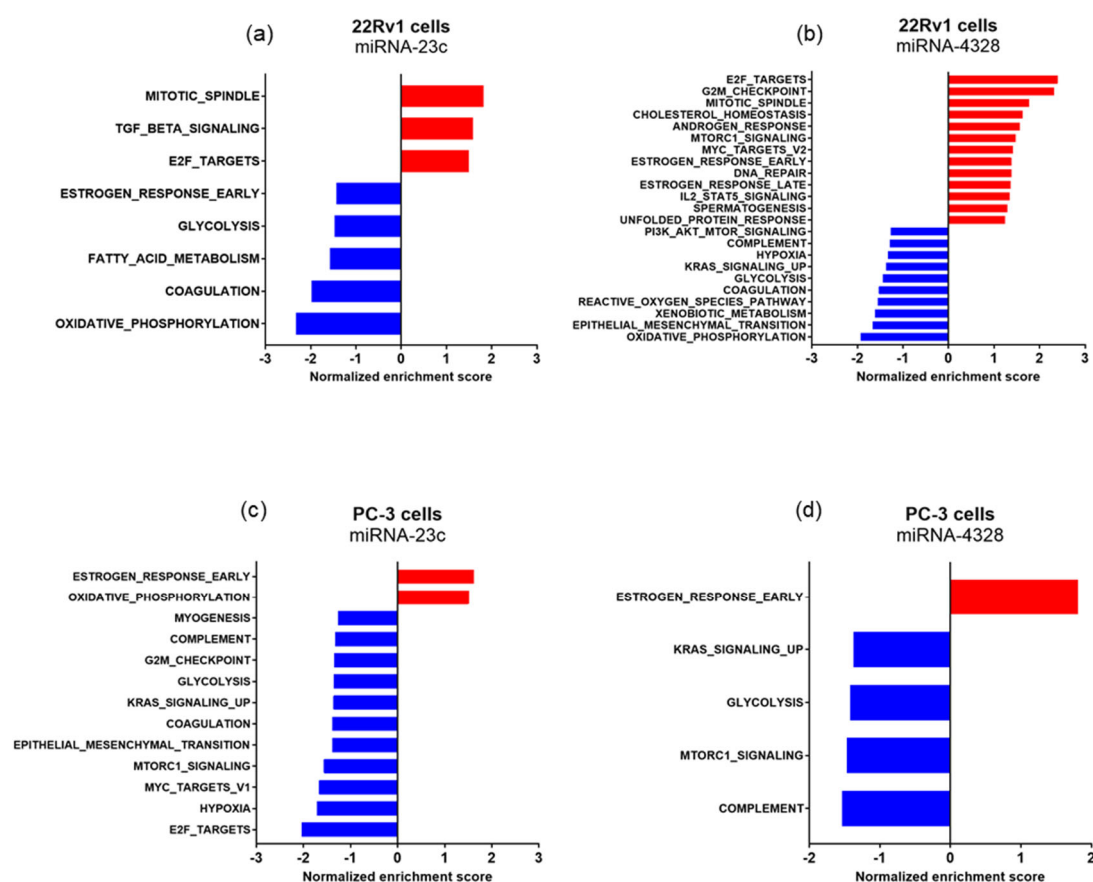

**Figure S4. Gene set enrichment analysis highlighting predefined cancer hallmark gene sets significantly affected by overexpression of miRNA-23c (a, c) or miRNA-4328 (b, d) in the 22Rv1 (a, b) and PC-3 (c, d) cell lines.** The normalized enrichment score displays whether genes in a gene set are over- or underrepresented at the top or bottom of the ranked list of all genes. Blue and red represent normalized enrichment scores that were significantly affected in a negative or positive way, respectively, according to analysis of single cell clones ( $n = 3$  per cell line) ( $\text{adj}p < 0.25$ ). The gene sets were retrieved from the Molecular Signatures Database v7.4 ([www.gsea-msigdb.org](http://www.gsea-msigdb.org)).
