# Supplementary material for: Investigating microRNA Profiles in Prostate Cancer Bone Metastases and Functional Effects of microRNA-23c and microRNA-4328
Source: Cancers (Basel). 2023 Apr 24;15(9):2437. doi: 10.3390/cancers15092437 (PMC10177411; doi:10.3390/cancers15092437)
Supplement: Supplementary file 1 [file cancers-15-02437-s001.zip]

Archive with 11 entries (11 files):
- Supplementary Figure_S1.pdf
- Supplementary Figure_S2.pdf
- Supplementary Figure_S3.pdf
- Supplementary Figure_S4.pdf
- Supplementary Figure_S5.pdf
- Supplementary Figure_S6.pdf
- Supplementary Figure_S7.pdf
- Supplementary methods.pdf
- Supplementary Table S1.xlsx
- Supplementary Table S2.xlsx
- Supplementary Table S3.pdf
