# Supplementary material for: Investigating microRNA Profiles in Prostate Cancer Bone Metastases and Functional Effects of microRNA-23c and microRNA-4328
Source: Cancers (Basel). 2023 Apr 24;15(9):2437. doi: 10.3390/cancers15092437 (PMC10177411; doi:10.3390/cancers15092437)
Supplement: Supplementary file 1 [file cancers-15-02437-s001.zip › Supplementary Table S1.xlsx]

## Sheet: Table S1
Table S1. MicroRNA array data showing normalized, median-centered fluorescence intensities (log2-transformed) in samples of benign, localized prostate cancer (PC), and bone metastasis tissue.
miR_ID	benign	benign	benign	benign	benign	benign	benign	localized_PC	localized_PC	localized_PC	localized_PC	localized_PC	localized_PC	localized_PC	PC_bone_met	PC_bone_met	PC_bone_met	PC_bone_met	PC_bone_met	PC_bone_met	PC_bone_met	PC_bone_met	PC_bone_met	PC_bone_met	PC_bone_met	PC_bone_met	PC_bone_met	PC_bone_met
hsa-miR-199a-3p, hsa-miR-199b-3p	0.688604	1.84748	0.685077	1.87222	2.21409	0.151783	0.481979	-2.23342	1.14793	0.0646934	-0.740728	-0.720192	0.0194273	-3.62116	-6.90642	-1.46132	0.601572	-1.00946	-0.0194273	0.684804	-2.56607	-6.90642	0.215499	-3.14184	-2.76265	-6.90642	0.67587	-3.58024
hsa-miR-365a-3p, hsa-miR-365b-3p	0.644351	1.15123	0.349486	0.956793	1.91482	0.653236	0.103415	-1.18203	0.213462	0.00142047	-0.498993	-1.0053	-0.835714	-1.35038	-2.4531	0.0016765	1.0328	-1.45611	-0.397626	0.430859	-0.00142047	-0.101398	-0.0424494	-0.520589	-2.42228	-1.8447	1.241	0.579449
hsa-miR-3689b-3p, hsa-miR-3689c	0	0	0	0	0	0	0	0	0	0	0	0	0	0	0	0	0	0	0	0	3.34132	0	0	3.85901	0	0	0	0
hsa-miR-516b-3p, hsa-miR-516a-3p	0	3.90906	0	0	0	0	0	0	0	0	0	0	0	0	0	0	0	0	0	0	3.41168	0	0	0	3.04813	0	0	0
hsa-miR-517a-3p, hsa-miR-517b-3p	0	0	0	0	0	0	0	0	0	0	0	0	0	0	0	0	0	0	0	0	0	3.40919	0	0	0	0	3.69332	0
hsa-miR-519c-5p, hsa-miR-523-5p, hsa-miR-518e-5p, hsa-miR-522-5p, hsa-miR-519a-5p, hsa-miR-519b-5p	0	0	0	0	0	0	0	0	0	0	0	0	0	0	0	0	0	0	0	0	3.21747	0	0	0	0	0	3.43864	0
hsa-miR-526a, hsa-miR-520c-5p, hsa-miR-518d-5p	0	3.41698	0	0	3.83421	4.09002	0	3.57084	0	0	0	0	0	0	0	0	0	0	3.61553	0	4.39885	3.42602	0	0	3.03915	0	3.32354	3.92802
hsa-miR-527, hsa-miR-518a-5p	3.67769	4.20146	0	0	0	0	0	5.18025	0	3.09926	0	0	0	0	0	0	3.62078	0	3.59894	3.9158	5.01081	5.26035	0	5.09176	0	3.27836	0	4.859
hsa-miR-548aa, hsa-miR-548t-3p	0	3.64649	0	0	3.51344	0	0	3.79765	0	0	0	0	0	0	0	0	3.00613	0	0	0	0	0	0	0	0	0	3.58122	0
hsa-miR-548ai, hsa-miR-570-5p	0	0	0	0	4.33449	0	0	3.45979	0	0	0	0	0	0	0	0	0	0	3.58475	0	0	0	0	0	0	0	0	0
hsa-miR-548c-5p, hsa-miR-548o-5p, hsa-miR-548am-5p	0	0	0	0	0	0	0	0	0	0	0	0	0	0	0	0	0	0	3.77275	0	3.79358	0	0	0	0	0	0	0
hsa-miR-548g-5p, hsa-miR-548x-5p, hsa-miR-548aj-5p	0	3.72341	0	0	0	0	0	0	0	0	0	0	0	0	0	0	0	0	0	0	0	0	0	0	0	0	0	0
hsa-miR-548z, hsa-miR-548h-3p	0	3.37094	0	2.45952	4.39676	0	0	3.54293	0	0	0	0	0	0	0	0	0	0	0	0	3.38715	0	0	0	0	0	0	0
hsa-let-7a-2-3p	0	3.86255	0	2.46447	3.81474	0	0	3.95547	0	0	0	0	0	0	0	0	0	0	0	0	0	0	0	0	0	0	3.25177	3.38766
hsa-let-7a-3p	0	0	0	0	2.98883	0	0	0	0	0	0	0	2.49578	0	0	0	0	0	0	0	0	0	0	0	0	0	0	0
hsa-let-7a-5p	-0.533669	0.932424	0.130794	0.750698	1.19627	0.490786	0.299378	-1.9599	1.04519	0.545726	-0.130794	-1.62826	-0.160618	-2.06233	-6.21953	-0.977536	1.21574	-0.844618	0.91427	2.08313	-0.858918	-0.237094	1.1316	-0.858348	-0.165557	-2.64095	1.39028	0.371333
hsa-let-7b-3p	-1.20077	-1.20077	1.35634	2.03367	1.41969	2.4056	-1.20077	2.47708	-1.20077	1.7528	-1.20077	1.20077	1.38229	-1.20077	-1.20077	2.05751	-1.20077	-1.20077	-1.20077	2.08523	2.85988	2.64314	-1.20077	-1.20077	-1.20077	-1.20077	2.53382	3.02329
hsa-let-7b-5p	-0.474513	0.883477	0.0106601	0.388154	1.0498	0.191122	0.32332	-2.009	0.543049	0.366162	-0.113476	-1.08398	-0.161774	-1.39358	-5.65498	-1.1047	0.898211	-0.972706	0.987118	1.6564	-0.0969735	-0.0106601	0.97809	-1.1807	-0.0990599	-2.3858	1.09004	0.219768
hsa-let-7c	-0.636515	0.597987	-0.0110818	0.457766	0.874055	0.017934	0.0961725	-1.65789	0.730889	0.442257	0.0110818	-1.37223	-0.37886	-2.10241	-5.11093	-1.45162	1.24715	-0.694099	0.528904	1.52873	-0.773317	-0.165595	1.28384	-0.720943	-0.167912	-2.52945	1.09473	0.282471
hsa-let-7d-3p	0	3.88837	2.41175	3.31796	3.98128	0	0	0	0	0	0	0	0	0	0	0	0	0	0	0	0	3.25806	0	3.37241	0	0	3.3113	0
hsa-let-7d-5p	-0.769767	0.581322	-2.85449e-05	0.51586	0.936829	0.100429	0.170535	-2.09396	0.846472	0.562258	0.202041	-1.38636	-0.331225	-2.47109	-5.59226	-1.13733	1.64925	-0.75636	0.547694	1.73354	-1.1037	-0.625557	1.42363	-0.594537	-0.19442	-2.94005	1.02977	2.85449e-05
hsa-let-7e-3p	0	0	0	2.843	3.90355	0	0	3.0178	0	0	0	0	0	0	0	0	0	0	0	0	0	0	0	0	0	0	3.14169	3.75389
hsa-let-7e-5p	-0.518303	0.931274	0.491786	0.69113	1.47083	0.231116	0.366749	-2.28244	0.844549	0.206886	-0.318768	-2.40489	0.123225	-2.96298	-6.19608	-1.20639	1.42665	-1.05944	0.815418	2.06405	-1.71302	-1.07854	1.48336	-1.24894	-0.290028	-3.60895	1.31294	-0.123225
hsa-let-7f-1-3p	2.48117	3.17554	-1.29389	2.8347	3.9938	2.07365	-1.29389	3.23417	-1.29389	1.73098	-1.29389	-1.29389	1.29389	1.89825	-1.29389	-1.29389	-1.29389	-1.29389	-1.29389	-1.29389	2.84281	2.24823	1.72769	2.11473	-1.29389	-1.29389	-1.29389	3.44918
hsa-let-7f-2-3p	0	0	0	2.35327	4.60519	0	0	0	0	0	0	0	0	0	0	0	0	0	0	0	3.74576	0	0	0	0	3.42952	0	0
hsa-let-7f-5p	-0.308858	0.909624	0.330702	0.918238	1.64513	0.194865	0.529038	-2.10659	0.770934	0.171504	-0.534723	-2.44203	0.0599689	-2.7251	-6.74132	-1.23554	1.50059	-1.12467	0.753654	2.11531	-1.95099	-1.14876	1.27465	-0.700668	-0.462823	-3.45708	1.17612	-0.0599689
hsa-let-7g-3p	0	0	0	0	0	0	0	0	0	0	0	0	0	0	0	0	0	0	0	0	0	3.37817	0	0	0	0	0	0
hsa-let-7g-5p	-0.011542	1.02625	0.332842	1.14425	1.87766	0.102504	0.273492	-2.82167	0.496557	-0.502071	-1.12148	-2.02399	-0.204942	-3.38227	-6.91229	-1.30847	1.45019	-1.14012	0.39765	1.6821	-2.75987	-1.52998	0.978449	0.0163445	-1.80628	-3.44011	1.36561	0.011542
hsa-let-7i-5p	0.436965	1.38597	0.485295	1.27098	1.48738	-0.250647	0.548371	-2.08107	0.904345	-0.0760169	-0.482181	-0.903566	0.0760169	-5.92118	-5.92118	-0.790653	2.24582	0.246406	0.447613	2.03309	-0.697637	-0.538204	0.683446	-1.11093	-1.05803	-5.92118	1.92062	-0.639829
hsa-miR-1	5.4059	5.73757	5.21134	6.26597	7.47129	5.29323	5.08411	-1.41242	4.90375	4.67641	5.21684	2.77056	3.44061	-1.41242	-1.41242	-1.41242	1.70879	-1.41242	-1.41242	-1.41242	-1.41242	-1.41242	1.41242	-1.41242	-1.41242	-1.41242	-1.41242	-1.41242
hsa-miR-100-3p	0	0	0	0	0	0	0	0	0	0	0	0	0	0	0	0	0	0	0	0	0	3.63182	0	0	0	0	0	0
hsa-miR-100-5p	0.579167	0.683339	0.506678	1.38094	2.04485	0.308319	0.607256	-2.55822	0.807237	0.0090541	0.0643596	-0.0846418	-0.105717	-2.70376	-7.90676	-2.9845	1.16944	-0.427642	-0.862138	-0.937867	-3.09151	-0.0090541	0.821374	1.11961	-3.71041	-4.58653	-0.688755	1.08254
hsa-miR-101-3p	0.612643	-4.00749	-0.21561	1.12582	3.01558	1.16534	0.875948	-4.00749	1.47984	0.245328	-0.330839	0.831488	0.889664	-4.00749	-4.00749	-4.00749	1.01421	-4.00749	0.851304	1.75655	-4.00749	-4.00749	0.21561	0.564674	-4.00749	-4.00749	-0.282098	-4.00749
hsa-miR-101-5p	0	0	0	0	2.7079	0	0	0	0	0	0	0	0	0	0	0	0	0	0	0	0	0	0	0	0	0	0	3.3913
hsa-miR-103a-3p	-0.0225343	0.412597	-0.0490136	0.454182	1.47149	0.15759	0.444731	-3.06735	0.458345	-0.372904	-1.23737	-1.53001	0.218315	-3.79901	-4.37077	-0.551486	1.68161	-0.861605	0.495827	2.32581	-1.61031	-1.64246	0.753844	0.0225343	-1.31063	-7.03929	1.87508	0.333266
hsa-miR-103b	0	0	0	0	0	0	0	0	0	0	0	0	0	0	0	0	3.34525	0	0	0	0	0	0	0	0	0	0	0
hsa-miR-105-3p	3.75365	0	0	0	0	0	0	0	2.3821	0	0	0	0	0	0	0	0	0	4.37797	0	0	0	2.7794	0	0	0	0	0
hsa-miR-105-5p	0	0	0	0	0	0	0	0	0	0	0	0	0	0	0	0	0	0	0	3.5464	0	0	0	0	0	0	0	0
hsa-miR-106a-3p	0	0	0	0	3.24161	0	0	0	0	0	0	2.27651	0	0	0	0	0	0	0	0	0	0	2.81937	0	0	0	3.93713	0
hsa-miR-106a-5p	-0.51675	-0.222766	0.535351	0.520732	1.73182	0.358551	0.501948	-1.89499	1.10112	-0.379204	-0.430479	-0.311763	-0.149871	-3.121	-6.72476	-0.420129	2.01392	-0.0824461	0.828966	2.95852	-1.52378	-2.36724	2.10184	2.2788	0.234177	-6.72476	2.20086	0.0824461
hsa-miR-106b-3p	0	3.40298	0	0	0	3.0384	0	0	0	0	0	0	0	0	0	0	4.22056	0	0	0	0	0	3.04907	0	0	0	3.36985	3.84447
hsa-miR-106b-5p	0.0750913	0.341496	-0.298798	0.580856	2.07183	0.171275	-0.287442	-1.44255	0.872512	-1.45378	-1.43241	-0.508313	0.696151	-4.98548	-4.98548	-0.0750913	3.39311	-0.359087	1.03939	2.11047	-0.0863106	-0.150643	2.30062	2.05406	-0.464914	-4.98548	2.32817	1.1314
hsa-miR-107	-0.0801884	0.0801884	0.27624	0.942241	1.85826	0.336017	0.531267	-2.75445	0.616743	-0.267642	-1.12859	-0.882286	0.419241	-2.99417	-6.59706	-0.414884	1.97739	-0.78472	0.625056	2.51754	-1.97793	-2.31172	0.952865	-0.167521	-1.07733	-6.59706	2.00353	0.540733
hsa-miR-10a-5p	-0.002496	0.820747	0.058221	0.893552	1.79359	-0.0237212	0.677747	-0.402531	0.327994	0.002496	-1.24977	-3.77197	0.0149133	-3.77197	-3.77197	-3.77197	0.995795	-0.486778	0.293697	1.4015	-3.77197	-0.233079	0.567514	-3.77197	-3.77197	-3.77197	2.45517	0.155674
hsa-miR-10b-3p	0	0	0	0	0	0	0	0	0	0	0	0	0	0	0	0	0	0	0	3.66466	0	0	0	0	0	0	0	0
hsa-miR-10b-5p	-0.941985	-0.140152	0.400341	0.236776	1.70925	0.709038	0.165695	-5.20214	0.934266	0.162265	-0.736649	-1.41567	0.0860638	-5.20214	-5.20214	-1.40836	1.10553	-0.253129	-0.0860638	1.57258	-0.71883	-1.51633	0.324722	0.13247	-0.629443	-5.20214	2.93429	1.06642
hsa-miR-1178-3p	0	0	0	2.54547	2.86889	0	0	3.20042	0	0	0	0	0	0	0	0	0	0	0	0	3.29398	0	0	0	0	0	0	0
hsa-miR-1178-5p	0	0	0	0	0	0	0	0	0	0	3.27374	0	0	0	0	0	0	0	0	0	0	0	0	0	2.98232	0	0	0
hsa-miR-1179	3.83077	3.84041	0	2.60504	3.9845	0	0	0	0	0	0	0	0	0	0	0	0	0	0	0	0	0	0	0	0	0	0	0
hsa-miR-1180	0	0	0	0	0	0	0	0	2.588	0	2.72119	2.32917	0	0	0	0	3.04419	0	0	0	0	0	0	0	0	0	0	0
hsa-miR-1181	-3.4394	-0.0494306	-0.927707	-0.0945171	0.233854	1.31879	0.208813	-3.4394	0.670048	0.197503	1.00118	0.0616168	0.0210265	-0.345278	-3.4394	-3.4394	-0.0210265	-3.4394	1.78644	1.24633	-3.4394	-3.4394	0.346606	0.397019	-0.448554	-3.4394	0.638847	2.30192
hsa-miR-1182	0	0	0	0	0	0	0	0	2.34424	2.63048	0	0	3.38713	0	0	0	3.82749	0	0	0	0	0	0	0	0	0	0	0
hsa-miR-1185-1-3p	-1.23088	-0.0229995	-0.464892	0.145134	-0.25129	-0.073008	-0.0983092	1.11004	0.497374	0.855335	0.768348	-0.54951	1.03931	0.464142	-0.42212	0.0229995	0.523541	-0.973277	0.524902	0.29151	1.98249	-0.052552	-0.198221	-4.57697	-0.20701	-1.30597	0.0957766	1.23162
hsa-miR-1185-2-3p	-0.349247	0.649016	-1.02078	-0.115326	0.0485704	-4.26243	-0.0457433	1.47988	0.0457433	-0.240707	0.325467	-1.68849	0.554472	0.27947	-0.498831	-0.184116	0.726517	-1.01487	0.898168	0.439973	2.11745	0.703798	-0.659108	-0.648014	-0.917732	0.331021	-0.390193	0.831146
hsa-miR-1193	-3.40662	-3.40662	-0.0436943	0.45758	0.109254	0.071377	0.415928	1.60515	0.0899912	-0.377717	0.199639	-0.0588356	-0.397088	-0.31018	-0.55094	-3.40662	-0.0288921	-3.40662	1.08462	-3.40662	1.51115	1.36793	0.0288921	0.095963	-3.40662	-3.40662	0.467324	0.848757
hsa-miR-1202	-0.904285	-0.110621	-1.12202	-0.13277	-0.0139386	-1.04175	0.588684	1.40259	0.531595	0.726185	1.20781	-0.739215	0.117872	1.31772	0.877771	0.0139386	0.664588	-0.581631	0.0629719	-0.281638	1.76348	1.12966	-0.728378	-0.602873	-1.13674	-0.62494	-0.212003	0.589397
hsa-miR-1203	-2.86172	1.27096	-2.86172	-0.0596232	-2.86172	0.0596232	0.217186	-2.86172	0.957503	1.5417	0.619036	-2.86172	0.651532	-2.86172	-0.375996	1.41904	1.57883	-2.86172	-2.86172	1.22914	1.27343	-2.86172	0.753769	-2.86172	-2.86172	-2.86172	0.47035	1.13952
hsa-miR-1207-3p	0	0	0	0	3.35788	0	0	3.29939	0	0	0	0	0	0	0	0	0	0	0	0	0	0	0	0	0	0	0	0
hsa-miR-1207-5p	-0.962632	-0.460229	0.0490741	0.050655	0.0980119	-0.733445	0.0648736	2.11421	0.217254	0.0261885	0.0139938	-0.0139938	0.414285	0.367492	0.108021	-1.14291	0.0640752	-2.13226	-0.0937451	-0.65857	2.1644	0.300267	-0.252654	-1.76987	-1.97338	-1.46418	-0.215273	-0.0378739
hsa-miR-1208	0	0	0	0	3.88432	3.42189	0	3.79507	0	0	0	0	0	0	0	0	0	0	0	3.63296	3.71674	0	0	0	0	0	0	0
hsa-miR-122-3p	0	0	0	0	3.04582	0	0	3.546	0	0	0	0	0	0	0	0	0	0	0	0	0	0	0	0	0	0	0	0
hsa-miR-122-5p	0	0	0	0	0	0	0	0	0	0	0	0	0	0	0	0	0	0	0	0	0	0	0	0	0	0	0	3.66073
hsa-miR-1224-3p	0	0	0	2.51255	0	4.43333	3.06091	3.45979	3.48449	3.98991	2.73728	0	3.63086	3.9226	0	0	0	0	0	0	4.24014	0	0	3.83572	0	0	0	5.43169
hsa-miR-1224-5p	-3.02485	0.789228	-0.867551	-3.02485	-0.232924	0.309096	0.232924	1.48733	1.08874	1.0123	0.612294	-0.301371	1.31889	1.18299	0.509645	-3.02485	1.06335	-3.02485	-3.02485	-3.02485	1.95994	0.286295	-3.02485	-3.02485	-3.02485	-3.02485	-3.02485	0.901577
hsa-miR-1225-3p	0.959744	0.691201	0.369259	0.642556	0.485929	1.88127	0.0289817	0.168709	-0.0289817	0.245529	-0.265647	0.132887	-0.183542	-0.193057	-2.4075	-0.741306	-0.35159	-1.55234	0.185734	-0.0567235	0.151267	-4.77094	-0.620724	0.450731	-1.52748	-0.957425	-0.150755	1.17692
hsa-miR-1225-5p	-1.62258	0.082026	-0.261817	0.125637	0.417329	-1.57042	0.501072	2.42966	0.214818	0.141658	0.517531	-0.620319	0.226685	1.11856	1.18985	-0.481528	-0.312458	-0.229411	-0.319441	-0.330781	2.91424	0.999163	-1.01248	-1.33974	-1.60421	-0.786009	-0.082026	0.448347
hsa-miR-1226-5p	0	0	0	0	0	0	0	0	0	3.20565	0	0	3.15039	0	0	4.05481	4.41675	0	0	3.5118	4.46205	0	2.92478	3.61768	0	0	0	0
hsa-miR-1227-3p	0	4.1432	0	3.13961	0	2.88341	0	0	0	0	0	0	0	3.32808	0	0	0	2.81498	0	0	0	0	0	0	0	0	3.34811	0
hsa-miR-1227-5p	-1.28202	-0.901934	0.0922843	0.219767	0.00258116	-0.478353	-0.00258116	1.56987	0.0778476	-0.120489	-0.0782682	0.133784	0.245057	0.00501112	0.317518	-0.665052	-0.18234	-1.41548	0.476642	0.089475	2.03176	-0.511643	-0.36729	-1.45077	-1.42383	-1.60175	0.224193	0.0308791
hsa-miR-1228-3p	0.625189	0.253711	-0.174401	-0.220531	0.10033	2.02261	-0.376317	0.652654	-0.107481	-0.619507	-0.0803802	-0.447736	0.351468	0.458594	-1.67581	0.166935	0.0803802	-0.599313	-0.989542	0.197575	0.959436	0.212807	-0.521587	0.191818	-1.43625	-0.27851	-0.136456	1.91687
hsa-miR-1228-5p	-0.816155	-0.626902	0.475841	0.491413	0.313829	0.628859	0.296492	1.96259	0.0716245	-0.409014	-0.043955	0.554729	0.264816	0.16572	0.014262	-0.744179	-0.662909	-1.30265	-0.185984	0.131785	1.60349	-0.57886	-0.649223	-1.28364	-1.44628	-1.34252	-0.014262	0.445742
hsa-miR-1229-3p	-0.223654	0.922962	-0.361603	0.290484	0.449534	-0.00430723	0.00430723	-0.942364	0.241602	0.185541	0.516367	-1.42254	0.113266	0.565217	-4.74001	-1.37144	-0.596358	-0.0942473	-4.74001	0.283328	-4.74001	-0.0144554	-0.890175	0.39829	-1.52718	1.40637	0.476897	0.617016
hsa-miR-1229-5p	-0.532834	-0.740639	-0.61111	-0.0413612	0.42588	0.0413612	0.731948	1.5608	0.384327	0.0840938	0.946189	-0.41716	0.328273	1.3333	0.159329	-0.657645	-0.205801	-0.85739	0.102983	-0.638639	1.84749	1.77348	-0.966528	-2.03994	-1.76303	-1.74244	-0.366491	1.09228
hsa-miR-1231	-0.78386	-0.200546	0.608861	0.375821	-0.0833132	-0.728152	0.120948	2.28513	0.0257334	-0.221983	-0.355158	-0.116931	0.512015	0.00349982	0.0555883	-0.78907	0.00420602	-1.30863	0.829699	0.381794	2.60098	-0.00349982	-0.11405	-1.54199	-0.838185	-0.927621	1.00968	0.46106
hsa-miR-1233-1-5p	-0.804217	-0.869321	-0.723875	-0.00487166	-0.0490994	-1.49514	-0.191988	0.797091	-0.055344	0.13287	0.367429	-0.517235	0.0613512	-0.0348431	0.251915	0.00487166	0.611155	-1.23102	0.804811	0.37931	1.98224	0.450683	0.471593	-1.38135	-0.332637	-1.53402	0.233494	0.922402
hsa-miR-1233-3p	0	3.53258	0	0	2.6515	0	0	0	0	0	0	0	0	0	0	0	0	0	0	0	0	0	0	0	0	0	0	3.27024
hsa-miR-1234-3p	1.16601	1.27322	-0.089221	-0.026266	0.137034	2.7327	-0.482725	0.026266	0.0797494	-0.419355	-0.36288	0.0317435	0.146966	-0.578074	-4.50084	-0.701659	-0.551716	-1.35806	0.603969	0.360153	0.676988	0.106629	-0.138301	-0.450601	-4.50084	-0.317082	0.217725	2.08574
hsa-miR-1234-5p	-0.562347	0.131211	-0.441578	0.262849	0.303219	-0.764336	0.115344	1.59573	0.308862	-0.0358412	0.312789	-0.279922	0.0358412	0.246014	0.157579	-0.825964	-0.286654	-1.016	0.191414	0.08739	1.56342	-0.23178	-0.832965	-0.327788	-1.3145	-1.41621	-0.127837	0.890853
hsa-miR-1236-3p	3.88079	4.12178	0	2.87056	3.49514	2.6143	0	3.88621	0	0	0	0	2.68508	0	0	0	0	0	0	0	4.28687	4.13486	0	0	0	0	0	3.71208
hsa-miR-1236-5p	0	0	0	0	0	0	0	0	0	0	0	0	0	3.45268	2.80499	0	3.09201	0	4.0398	3.53411	4.17766	5.82081	0	0	0	0	0	3.60492
hsa-miR-1237-3p	0.547534	0.398627	0.0562763	-0.602523	-3.26031	1.83463	-0.0508513	1.0744	-3.26031	-0.531265	-0.0251476	0.0889134	0.0312506	1.48909	-3.26031	0.682958	-3.26031	-0.202748	-3.26031	-3.26031	2.33641	0.0251476	-0.46615	0.671781	-3.26031	-3.26031	0.684841	2.06749
hsa-miR-1237-5p	-0.4234	-0.489653	0.470956	0.447858	0.229874	0.179644	0.000952974	1.61827	0.134138	-0.559119	-0.000952974	-0.125384	0.273079	0.0878407	-0.306461	-0.843238	-0.474056	-1.3406	0.284518	0.139223	1.45324	-0.880305	-0.53734	-0.949247	-1.30729	-1.20524	0.301549	0.7571
hsa-miR-1238-3p	-0.0572572	0.386194	-1.16107	-0.601493	-0.126717	2.03932	-0.17247	1.12641	-0.0636669	0.0572572	0.17931	-1.0857	0.565287	0.861604	0.705938	0.38295	0.135187	-0.383481	-3.41487	-3.41487	1.77009	-3.41487	-0.400928	1.22975	-3.41487	-3.41487	0.630085	2.41584
hsa-miR-1238-5p	0.229266	0.263742	-0.676738	-0.211341	0.139779	0.785	-0.0885875	2.42833	-0.0147413	-0.0626536	0.0147413	-0.886768	0.093373	1.16682	-1.99089	-0.0776406	-0.12665	-0.196749	-0.684031	0.351122	1.80818	1.80363	-0.349366	1.94366	-5.08046	0.102663	-0.317863	2.57398
hsa-miR-124-3p	0	0	0	0	0	0	0	0	0	0	0	0	0	0	0	0	0	0	0	0	3.37307	0	0	0	0	0	0	0
hsa-miR-124-5p	0	3.87502	0	0	3.92622	3.07687	0	3.27161	0	0	0	0	0	0	0	0	0	0	0	0	0	0	0	0	0	0	0	0
hsa-miR-1243	0	0	0	0	0	0	0	0	0	0	0	0	0	0	0	0	0	0	0	0	0	0	0	3.36218	0	0	0	0
hsa-miR-1244	0	0	0	0	0	0	0	0	0	0	0	0	0	0	0	0	0	0	0	0	0	0	0	0	2.92571	0	0	0
hsa-miR-1245b-3p	0	0	0	0	0	0	0	0	0	0	0	0	0	0	0	0	0	0	3.79734	0	0	0	0	0	0	0	0	3.66219
hsa-miR-1245b-5p	0	0	0	0	0	0	0	0	0	0	0	0	0	0	0	0	0	0	3.5137	0	0	3.53269	0	0	0	0	0	0
hsa-miR-1246	-0.623442	-0.0174363	-0.368025	-0.15787	0.861853	-1.5478	0.510517	-6.91689	0.689329	0.40746	0.541148	-0.728953	-0.383193	-1.83686	-1.65155	0.266262	0.221326	-3.25038	-1.87528	1.05098	0.338313	0.636726	1.16759	-1.5261	0.501298	-6.91689	0.237011	0.0174363
hsa-miR-1247-3p	-0.100929	-1.08838	-0.40869	0.0190152	-0.0190152	0.661131	0.403673	0.149555	0.468878	-0.0289116	1.56821	-0.286428	-0.0872042	0.595969	-2.15879	-0.644417	-0.179118	-1.17188	0.525985	-0.0716173	0.649691	1.48056	0.584309	0.0722014	-1.04079	-1.33501	0.510455	1.52192
hsa-miR-1247-5p	0	0	0	0	0	3.06986	0	0	0	0	0	0	0	0	0	0	3.90743	0	0	0	0	0	2.78585	0	0	0	0	0
hsa-miR-1248	3.35655	0	3.36525	0	2.99483	0	0	0	2.99957	0	0	0	3.10423	0	0	0	3.85045	0	4.83023	4.87939	0	0	4.01037	0	0	0	3.57966	0
hsa-miR-1249	1.41912	-0.657923	0.491629	0.528051	0.459108	3.30494	0.241769	0.441043	0.14827	-1.06896	-0.335298	0.972622	0.281357	0.332461	-1.65989	-0.297422	-1.12125	-1.26972	-0.827576	-0.626728	0.473094	-0.316442	-0.108014	0.108014	-5.53824	-0.574231	-0.12715	1.37071
hsa-miR-1250	0	0	0	0	0	0	0	0	0	0	0	0	0	0	0	0	0	0	0	4.89451	0	0	0	0	0	0	3.6303	0
hsa-miR-1252	0	0	0	0	0	3.00121	0	0	0	0	2.62293	0	0	0	0	0	0	0	0	0	0	0	0	0	0	0	0	0
hsa-miR-1253	4.38407	0	0	0	0	0	0	0	0	0	0	0	0	0	0	0	0	0	0	0	4.20343	0	2.80562	0	0	0	3.29775	0
hsa-miR-1254	0.882741	0.890745	-0.715824	-0.190403	0.110162	-3.0582	-0.110162	0.645087	-0.162412	-3.0582	0.428249	-3.0582	0.710864	-3.0582	-3.0582	0.171185	1.18633	-3.0582	0.813156	-3.0582	1.47047	1.70704	0.570605	-3.0582	-3.0582	-3.0582	1.11991	0.905527
hsa-miR-1255a	4.10259	0	0	0	0	0	0	0	0	0	0	0	0	0	0	0	0	0	0	3.4475	3.25615	0	0	0	0	0	3.68428	0
hsa-miR-1255b-5p	0	0	0	0	0	4.52876	0	0	2.34431	0	0	0	0	0	0	0	0	0	0	0	0	0	0	0	0	0	0	0
hsa-miR-1256	0	0	0	0	0	0	0	3.01509	0	0	0	0	0	0	0	0	0	0	0	0	0	0	0	0	0	0	0	0
hsa-miR-125a-3p	-0.353907	0.453949	-0.632513	0.0419241	0.395002	0.841355	-0.141687	1.11325	0.4925	0.381126	0.14201	-2.07154	0.433229	1.46423	-2.4351	-1.23808	-1.36262	-0.0768243	-3.06746	-0.489465	0.68486	-0.0419241	-1.34965	0.0789127	-1.97122	0.488619	-0.174863	1.02837
hsa-miR-125a-5p	0.345628	1.17041	1.2341	1.62502	1.72257	-0.235535	0.767422	-3.50302	0.966071	0.534381	0.00025775	-0.00025775	-0.239414	-1.99806	-8.35495	-2.85586	0.901401	-2.60618	0.00432788	0.945076	-2.55201	-1.13774	0.058551	-0.459065	-2.36038	-2.72164	0.388603	-1.78129
hsa-miR-125b-1-3p	3.61014	4.32574	0	3.42919	4.41127	3.72799	0	3.51325	0	0	3.84157	0	0	0	0	0	0	0	0	0	3.259	4.79372	0	0	0	0	3.46883	3.26964
hsa-miR-125b-2-3p	0	0	2.15838	2.54583	3.84023	0	2.79473	0	0	0	0	0	0	0	0	0	0	0	0	0	3.34187	0	0	0	0	0	0	3.55632
hsa-miR-125b-5p	0.221556	1.27253	1.20387	1.86366	2.02324	0.00249912	-9.07247	-2.44747	0.798629	0.430394	0.151663	0.279019	-0.495842	-1.14408	-9.07247	-2.82918	1.14157	-1.07507	-0.838922	-0.295144	-2.80122	0.0267096	0.137406	0.797176	-2.6877	-2.1645	-0.410236	-0.00249912
hsa-miR-126-3p	0.251242	0.375133	1.26421	1.45956	2.13334	0.666742	0.781078	-3.05266	1.00348	-0.501361	-1.55122	-0.698381	-0.212054	-6.44334	-6.44334	-0.691068	1.66323	0.212054	0.985902	2.2156	-6.44334	-1.74416	1.0718	-0.424211	-1.42231	-2.70758	1.70153	-0.362867
hsa-miR-126-5p	0.801927	0.693789	0.860285	1.06598	1.44894	0.293927	0.290421	-3.41006	0.657064	-0.370613	-3.41006	-3.41006	-0.297784	-3.41006	-3.41006	-3.41006	1.0541	-0.100446	0.515137	2.2454	-3.41006	-3.41006	0.74081	0.100446	-3.41006	-3.41006	1.0634	-3.41006
hsa-miR-1260a	-0.09495	0.552153	-0.192565	0.242542	0.594193	-0.187984	0.0646272	-0.996062	0.607805	0.218034	0.353086	-0.973702	0.515542	0.834041	-5.06495	-0.842229	-0.0646272	-0.231672	-2.54997	0.656445	-1.76321	-0.577267	-0.480959	1.21346	-1.19805	1.13768	0.53024	1.12169
hsa-miR-1260b	-0.314257	0.677464	-0.0352501	0.322135	0.653635	-0.2288	0.0352501	-0.768912	0.511657	0.253148	0.331401	-1.05631	0.479523	0.659877	-4.4297	-0.680176	-0.0399479	-0.131071	-2.01504	0.863943	-1.29041	-0.43816	-0.452183	1.27808	-0.816325	1.03714	0.671561	1.24553
hsa-miR-1261	0	0	0	0	0	0	0	0	0	0	0	0	0	0	3.55862	0	0	0	0	4.08751	0	0	0	0	0	0	0	0
hsa-miR-1264	0	0	0	0	0	0	0	0	0	0	0	0	0	0	0	0	0	0	0	0	0	0	0	0	0	0	0	3.45076
hsa-miR-1265	0	0	0	0	0	0	0	0	0	0	0	0	0	0	0	0	0	0	0	3.6421	0	0	0	0	0	0	0	0
hsa-miR-1267	0	0	0	0	2.85111	3.87959	0	4.41016	0	0	0	2.3915	2.9131	0	0	0	0	0	3.88014	0	4.14569	3.66358	0	0	0	0	0	4.49131
hsa-miR-1268a	-0.874458	-0.511987	0.725144	0.806571	0.718619	0.211661	0.326948	2.25562	0.14551	-0.307027	-0.128927	0.388057	0.251495	0.19623	-0.281618	-1.01845	-0.687068	-1.49277	0.128927	-0.16204	1.2506	-0.338589	-0.381463	-1.13991	-1.87947	-1.19991	0.222353	0.619139
hsa-miR-1268b	-1.41333	-0.517927	0.13202	0.400094	0.107784	-0.517617	0.409955	2.5907	0.0853535	-0.0304258	0.0304258	0.158359	0.108557	0.841505	0.846491	-0.364129	-0.281554	-0.80488	-0.301161	-0.191916	2.56686	0.326128	-0.985034	-1.66261	-1.49449	-0.330539	-0.263116	0.119857
hsa-miR-1269a	0	0	0	0	3.89353	0	0	0	0	0	0	0	0	0	0	0	0	0	0	0	0	0	0	0	0	0	0	0
hsa-miR-127-3p	3.67263	4.32071	0	2.68991	3.67495	0	0	0	0	0	3.13124	0	0	0	0	0	3.29291	0	3.66298	3.50041	0	3.29174	3.02454	0	0	0	4.14714	0
hsa-miR-1270	0	0	0	0	2.66711	2.65781	0	0	0	0	0	0	0	0	0	0	0	0	0	3.36679	0	3.28752	0	0	0	0	0	0
hsa-miR-1271-3p	0	3.79576	0	0	0	0	0	0	0	0	0	0	0	0	0	0	0	0	0	3.45371	0	0	0	0	0	0	0	0
hsa-miR-1272	0	0	0	2.48139	3.73502	2.70483	0	0	0	0	0	0	0	0	0	0	0	0	0	0	0	3.76978	0	0	0	0	0	0
hsa-miR-1273a	0.0420293	0.191887	-3.42169	-3.42169	-3.42169	0.305264	0.0350279	-3.42169	1.00546	1.00216	-0.0272377	-1.0403	1.02266	0.662881	-3.42169	0.493931	1.1781	-3.42169	-3.42169	0.0272377	0.0601633	-3.42169	0.459548	-3.42169	-3.42169	-3.42169	-3.42169	1.10064
hsa-miR-1273c	0	0	0	2.68348	3.01352	0	2.96812	0	2.63103	0	3.07337	0	0	3.09706	0	3.41344	4.00711	0	0	0	0	6.53006	0	0	0	0	0	3.45297
hsa-miR-1273d	0	0	0	0	0	0	0	0	0	0	0	0	3.63819	0	0	3.27737	3.82437	0	0	0	3.93284	0	3.184	0	0	0	0	0
hsa-miR-1273e	0.990139	1.41987	-0.198258	1.10024	1.22139	-0.919013	1.64247	-4.39865	1.70135	2.88156	1.92036	0.55649	2.38948	-0.262727	-4.39865	-0.560516	1.84393	-4.39865	-0.0927528	0.811533	-0.436977	-0.130646	0.565091	-4.39865	-0.186501	-4.39865	0.0927528	-0.742867
hsa-miR-1273f	-4.09137	0.524411	-4.09137	-0.344717	-0.796593	-4.09137	0.52658	0.209699	0.985377	1.40551	0.499293	-0.328291	1.77563	0.766807	-1.03042	1.1379	1.97835	-4.09137	-0.209699	0.961606	1.72345	1.3495	1.09497	-0.674623	-1.11564	-4.09137	-0.627919	-0.430648
hsa-miR-1273g-3p	0.626645	1.35338	1.14372	1.4842	2.18244	0.637489	-0.00441	-3.06862	2.51748	2.26162	1.55367	0.231225	0.861821	-2.14918	-4.95047	0.00441	1.21326	-3.58762	-0.480959	0.843042	-1.52483	-0.535626	-2.49243	-7.35222	-1.45509	-7.35222	-0.306844	-0.901475
hsa-miR-1273g-5p	0	0	0	0	0	0	0	0	0	0	0	0	2.8603	0	2.3111	3.67639	3.17934	0	0	0	4.27459	3.95841	0	0	0	0	0	3.92969
hsa-miR-1275	-0.194903	-0.40395	-0.79017	0.0577047	0.640016	-0.053023	0.895599	0.88958	0.753427	0.19609	1.60646	-0.277525	0.334455	1.87454	-0.455267	-0.80507	0.189129	-1.32811	0.033201	-0.108591	1.7244	2.66007	-0.033201	-0.909766	-1.22525	-1.02332	-0.548483	1.3016
hsa-miR-128	3.67641	0	3.56424	2.57609	2.74144	2.75043	0	0	4.05058	0	0	0	3.92439	0	0	0	4.37818	0	0	3.99995	0	0	3.33363	0	0	0	4.77955	3.60748
hsa-miR-1281	0	3.42657	2.24774	2.98313	0	3.72766	2.63233	0	2.68615	3.50596	0	2.5347	3.58351	0	0	3.3509	3.75877	0	0	0	3.77963	0	0	0	0	0	3.64311	0
hsa-miR-1282	3.33029	0	0	0	0	0	0	0	0	0	0	0	0	0	0	0	0	0	0	0	0	0	0	0	0	0	0	0
hsa-miR-1283	4.10009	0	0	0	3.3636	0	0	0	0	0	0	0	0	0	0	0	0	0	0	0	0	0	0	0	0	0	3.91539	0
hsa-miR-1284	0	4.05159	0	0	0	0	0	0	0	0	0	0	0	0	0	0	0	2.96616	0	0	0	0	0	0	0	0	0	0
hsa-miR-1285-3p	-0.42194	-0.217801	-3.8063	-0.0808944	0.170052	-0.802288	0.307856	-3.8063	1.63854	1.72111	0.389727	-1.53131	2.04848	-3.8063	-3.8063	1.53524	2.30984	-3.8063	-0.0830449	0.970543	0.841681	-3.8063	1.44331	-3.8063	0.0808944	-3.8063	0.765739	0.414342
hsa-miR-1285-5p	0	0	0	0	0	0	0	0	0	2.91378	0	0	3.23938	0	0	0	3.76901	0	0	0	0	0	0	0	0	0	0	0
hsa-miR-1289	0	0	0	0	0	0	2.62048	0	0	0	0	0	0	0	0	0	0	0	0	0	0	0	0	0	0	0	0	0
hsa-miR-129-1-3p	0	0	0	0	0	2.79979	0	0	0	0	0	0	0	0	0	0	0	0	0	0	0	0	0	0	0	0	0	3.33422
hsa-miR-129-2-3p	3.33044	0	0	2.34626	0	0	0	3.20042	0	0	0	0	0	0	0	0	0	0	0	0	0	0	0	0	0	0	0	3.50175
hsa-miR-129-5p	0	3.44822	0	2.64648	2.72338	2.75379	0	3.8451	0	0	0	0	0	0	0	0	0	0	0	3.38016	4.77772	0	0	0	0	0	0	3.60178
hsa-miR-1290	0.016864	0.104934	-1.48585	-0.451813	-0.871831	-3.98743	1.30019	-3.98743	0.992179	-0.016864	0.672674	-3.98743	-0.199556	-3.98743	-0.933069	0.31811	0.462746	-3.98743	-3.98743	1.31707	0.443829	0.932374	2.14833	-0.460591	0.640644	-3.98743	1.09772	0.993418
hsa-miR-1292-3p	0.59157	-3.31297	1.99801	0.921813	0.960937	2.21505	0.687816	-3.31297	-0.164652	-0.146774	-0.0125165	-0.363603	0.261156	-3.31297	-3.31297	-0.355156	0.0519243	-3.31297	1.24425	0.795368	-3.31297	-3.31297	0.179305	-3.31297	-3.31297	0.0125165	0.809148	0.655929
hsa-miR-1292-5p	-3.3001	0.536963	-0.0687793	-0.261819	0.959837	0.178299	0.257696	1.69922	-0.0830668	-0.424382	0.784298	-0.53456	-0.141009	-0.15584	-3.3001	-3.3001	0.0326428	-3.3001	0.753453	0.418338	2.08708	1.56604	-0.0326428	0.111123	-3.3001	-3.3001	0.677057	1.34935
hsa-miR-1293	0	0	0	0	0	0	0	0	0	0	0	0	0	0	0	0	0	0	0	0	3.23314	3.50896	0	0	0	0	0	0
hsa-miR-1294	0	0	0	0	0	0	0	0	0	0	0	0	0	0	0	0	0	0	0	3.84282	0	0	0	0	0	0	0	0
hsa-miR-1295b-3p	0	0	0	0	0	0	0	0	0	0	0	0	0	0	0	0	0	0	3.61508	0	0	0	0	0	0	0	0	3.61098
hsa-miR-1296	0	0	0	0	0	0	2.59021	0	0	0	0	0	0	0	0	0	0	0	0	0	0	3.64833	0	0	0	0	0	0
hsa-miR-1298	-0.949388	0.00599596	-2.6175	-0.991163	-0.111377	-0.536449	-0.918603	0.541714	-0.723375	-0.00599596	-1.03967	-2.14179	-0.428703	1.54375	0.537702	2.20271	0.264356	-1.81666	-1.20483	0.872831	3.7318	1.50024	1.36607	0.0422342	-0.725731	0.420764	0.468694	2.81956
hsa-miR-1299	0	0	0	0	3.5189	0	0	3.42962	0	0	0	0	0	0	0	0	3.26647	0	0	0	0	0	0	0	0	0	0	0
hsa-miR-1301	0	3.70747	0	0	0	0	2.51583	0	0	0	0	0	0	0	0	0	0	0	0	0	0	4.04217	0	0	0	0	3.20952	3.92643
hsa-miR-1302	0	3.48737	0	0	4.03893	2.84062	0	3.86628	0	0	0	0	0	0	0	0	0	0	0	0	0	0	0	0	0	0	0	0
hsa-miR-1303	-2.87411	1.12937	-2.87411	0.054718	1.45122	0.401011	-0.258122	2.24174	-0.214866	-2.87411	-2.87411	-2.87411	1.16397	0.271636	-0.054718	1.44753	2.3231	-2.87411	1.2101	-2.87411	2.30593	2.03855	1.02584	-2.87411	-2.87411	-2.87411	-2.87411	2.55758
hsa-miR-1304-3p	0	0	0	0	0	3.50483	0	0	0	3.57248	2.95987	0	2.68081	3.89357	0	0	0	0	0	3.43388	0	0	0	3.70081	0	0	0	4.49188
hsa-miR-1304-5p	0	0	0	0	0	0	0	0	0	0	0	0	2.54195	0	0	0	3.29616	0	0	0	0	0	0	3.64752	0	0	0	0
hsa-miR-1306-5p	0	0	0	0	0	3.68027	2.8006	3.01951	0	0	0	0	2.49822	3.60279	0	0	3.06593	2.79327	0	0	0	0	0	0	0	3.47927	0	0
hsa-miR-1307-3p	-0.423915	-0.265653	0.198446	0.135852	-1.10449	-0.434503	0.61559	1.85396	0.492003	0.025404	0.365095	0.401393	0.647426	-0.025404	0.522998	-0.548262	0.464121	-1.99377	-0.170561	1.01896	2.49836	-0.315178	-0.147885	-5.20448	-1.05993	-5.20448	0.548603	-0.057797
hsa-miR-1307-5p	0	3.78173	0	2.89469	0	0	0	0	0	0	0	0	0	0	0	0	0	0	0	0	0	0	0	0	0	0	3.11481	3.84841
hsa-miR-130a-3p	1.16077	1.7553	1.31475	2.18593	2.9111	0.573881	1.32861	-5.33722	1.39092	0.38957	-0.00708226	0.575665	0.00708226	-5.33722	-5.33722	-5.33722	0.0340854	-5.33722	-0.825463	0.513864	-5.33722	-5.33722	-0.139288	-5.33722	-1.78635	-5.33722	0.245088	-5.33722
hsa-miR-130a-5p	0	0	0	0	0	0	0	0	0	0	0	0	0	3.09474	0	0	0	0	0	3.96883	0	0	0	0	0	0	0	0
hsa-miR-130b-3p	0	4.27494	3.66529	4.28044	4.50523	0	3.5615	0	3.90355	0	0	0	3.03446	0	0	0	5.37926	0	3.55181	4.20803	3.08745	0	3.65184	0	0	0	5.14816	0
hsa-miR-130b-5p	0	0	0	0	0	0	0	0	0	0	2.62138	0	0	3.14411	0	0	3.9416	0	0	0	0	0	0	0	0	0	3.6446	0
hsa-miR-132-3p	0	0	0	0	0	0	0	0	0	0	0	0	0	0	0	0	3.33581	0	0	0	0	3.64025	0	0	0	0	0	0
hsa-miR-132-5p	0	0	0	0	0	3.21089	0	0	0	0	2.86249	0	0	0	0	0	0	0	0	0	0	0	0	0	0	0	0	0
hsa-miR-1323	0	0	0	0	0	0	0	3.43293	0	0	0	0	0	0	0	0	0	0	0	0	3.80314	3.3186	0	3.33879	0	0	0	0
hsa-miR-133a	1.95275	2.07399	1.3567	2.23348	3.56613	1.6486	1.82534	-3.54161	1.0499	1.6315	3.33785	1.20024	0.130842	0.130434	-3.54161	-3.54161	-3.54161	-3.54161	-3.54161	-3.54161	-3.54161	0.599325	-3.54161	-0.130434	-3.54161	-3.54161	-3.54161	-0.146253
hsa-miR-133b	2.00104	1.89715	1.24096	2.08738	3.38462	1.47826	1.88032	-0.797839	1.06751	1.52412	3.27275	1.02431	-0.41728	0.0533284	-3.8978	-0.619638	-3.8978	-3.8978	-3.8978	0.421232	0.462429	-0.370205	-3.8978	-3.8978	-3.8978	-0.464189	-3.8978	-0.0533284
hsa-miR-134	3.83626	3.86443	0	2.79	3.3014	0	3.27621	3.70054	0	0	0	2.29188	0	0	0	0	0	0	4.31989	3.68069	4.13933	3.79293	0	0	0	0	0	5.44764
hsa-miR-1343	-0.15817	0.231782	-0.132689	-0.0436192	0.315916	0.0902672	0.0161425	0.103277	0.309724	-0.166851	-0.00440797	-1.46163	0.641448	-1.24251	-1.75855	-0.521242	0.385924	-1.10922	-0.306882	0.693757	0.00440797	0.22817	0.0301817	-0.0797905	-1.01457	-0.894666	0.42588	1.15574
hsa-miR-135a-3p	0	0	0	0	0	0	3.67886	0	0	0	4.265	2.39429	3.10742	4.13548	0	0	3.12567	0	3.88306	0	0	4.63111	0	3.41101	0	0	0	4.43669
hsa-miR-135a-5p	0	0	0	2.48295	4.76255	0	0	0	0	0	0	0	0	0	0	0	3.46089	0	0	0	0	0	0	0	0	0	0	0
hsa-miR-135b-3p	0	0	0	0	0	0	0	0	0	0	0	0	0	3.14411	0	0	0	0	0	0	0	0	0	0	0	0	0	0
hsa-miR-135b-5p	3.48887	0	0	2.67387	4.30817	0	0	0	0	0	0	0	0	0	0	0	3.03634	0	0	0	3.36018	0	0	0	0	0	0	0
hsa-miR-136-3p	3.9469	0	0	0	0	0	0	0	0	0	0	0	0	0	0	0	0	0	0	0	0	0	0	0	0	0	3.25443	0
hsa-miR-136-5p	0	0	0	0	3.16574	0	0	0	0	0	0	0	0	0	0	0	0	0	4.10372	0	3.16795	0	0	0	0	0	0	0
hsa-miR-137	0	0	0	0	0	0	0	0	0	0	0	0	0	0	0	0	0	0	0	0	0	0	6.82506	0	0	0	0	0
hsa-miR-138-1-3p	0.763323	1.19679	-1.20159	-0.183322	0.514065	0.850936	-0.283052	0.290506	0.416904	0.0326132	-0.0657709	-3.63803	-0.0326132	0.195605	-3.63803	-0.631112	-3.63803	-0.266011	0.135757	0.106055	0.950982	-3.63803	-0.79495	1.10396	-3.63803	0.32394	-0.496614	1.91776
hsa-miR-138-2-3p	0	3.50368	2.04504	2.59916	0	4.08974	2.88938	0	4.3963	3.70362	3.87029	2.3901	3.83794	3.32782	0	0	0	0	0	3.50921	0	0	0	0	0	0	3.52791	0
hsa-miR-138-5p	0	3.36274	0	2.63748	0	0	0	0	0	0	0	0	0	0	0	0	0	0	4.38684	0	0	3.46757	3.33776	0	0	0	3.24623	0
hsa-miR-139-3p	0.788944	-3.45587	-0.407064	-0.513189	0.471663	0.335967	0.432947	0.519231	-0.244152	-0.530663	-0.0706544	-0.592862	-0.257654	-3.45587	-0.333952	0.290451	0.295103	-3.45587	1.306	0.728373	1.74493	0.0706544	-0.375399	0.166068	-3.45587	-3.45587	0.266196	0.765459
hsa-miR-139-5p	3.85354	0	3.3137	3.05025	0	0	2.91042	0	0	0	0	2.81833	0	0	0	0	0	0	0	0	0	0	0	0	0	0	0	0
hsa-miR-140-3p	0.522998	0.902293	0.0692881	1.20505	1.50928	0.392705	0.00668323	-4.26122	0.887057	-0.00668323	-0.173224	-0.25682	0.501073	0.101898	-4.26122	-0.738197	0.464965	-1.43572	-4.26122	0.788268	-4.26122	-1.01669	1.11117	-4.26122	-4.26122	-4.26122	0.483591	-0.0747655
hsa-miR-140-5p	1.32878	1.78724	1.04734	2.38679	3.0508	0.154394	1.5131	-2.80919	1.61078	-0.154394	0.31107	-0.505664	0.872482	-2.80919	-2.80919	-2.80919	2.03405	-2.80919	-2.80919	1.80157	-2.80919	-2.80919	2.39772	-2.80919	-2.80919	-2.80919	1.92209	-2.80919
hsa-miR-141-3p	-0.797931	-5.30604	0.475093	0.907819	3.37829	1.37348	1.45439	-5.30604	2.17169	-0.483296	-0.611939	1.78274	-0.475093	-5.30604	-5.30604	-0.820239	3.14692	-5.30604	2.28536	2.96605	-5.30604	-5.30604	1.06191	0.518283	-0.541457	-5.30604	2.52875	0.784337
hsa-miR-141-5p	0	0	0	0	2.99588	0	0	0	0	0	0	0	0	0	0	0	0	0	0	0	0	0	0	0	0	0	0	3.32052
hsa-miR-142-3p	1.09888	1.44921	0.310836	1.70031	2.67267	-2.87142	1.46233	-2.87142	1.73112	0.712915	-0.281265	0.683815	1.87356	-2.87142	-2.87142	0.281265	-2.87142	-2.87142	1.6414	-2.87142	-2.87142	-2.87142	0.849797	-2.87142	-2.87142	-2.87142	1.90076	-2.87142
hsa-miR-142-5p	4.19564	4.13614	3.11514	4.08102	4.55394	0	3.50483	0	3.26019	0	0	0	3.52542	0	0	0	3.0443	0	0	0	0	0	0	0	0	0	0	0
hsa-miR-143-3p	3.6208	3.44025	3.12948	4.23383	4.88935	3.29264	3.51948	-1.42475	3.2551	3.31161	2.08375	2.60629	2.23356	-0.19019	-7.80745	-2.79355	-0.347914	-2.06822	-1.21828	-0.0678685	-3.88683	-3.59843	0.379825	-2.46209	-3.34325	-7.80745	0.0678685	-2.18717
hsa-miR-143-5p	5.24428	5.66439	3.8699	5.52482	6.02129	5.03341	5.00455	0	4.80497	4.75018	3.83235	3.85808	3.86489	0	0	0	0	0	0	0	0	0	0	0	0	0	0	0
hsa-miR-144-3p	0	0	0	0	4.46029	0	0	0	0	0	0	0	0	0	0	0	4.03821	0	3.51044	4.73951	0	0	3.33103	0	0	0	4.01164	0
hsa-miR-145-3p	5.05821	5.40547	4.34629	5.55496	6.1013	4.14044	4.62764	0	4.0819	4.04628	3.67269	4.08162	3.09935	0	0	0	0	0	0	0	0	0	0	0	0	0	0	0
hsa-miR-145-5p	3.26556	3.407	3.78354	4.19729	4.27092	2.41247	2.37753	-2.16408	3.04081	3.51132	2.6399	2.39059	2.307	-0.160354	-7.98714	-3.1206	0.187617	-3.8264	-1.22039	0.0263642	-4.30715	-3.03079	-0.0479453	-3.13282	-2.49802	-7.98714	-0.0263642	-3.36156
hsa-miR-1468	4.07194	0	0	0	0	0	0	0	0	0	0	0	0	0	0	0	0	0	0	0	0	0	0	0	0	0	0	0
hsa-miR-1469	0.31165	-0.367739	0.0205382	0.409063	0.415038	0.301093	0.304445	1.74822	-0.205695	-0.833843	0.152238	0.316607	-0.0373282	-0.0205382	-0.84011	-1.79586	-0.723434	-1.44704	0.828976	-0.114475	1.70492	0.75441	-0.354653	-0.85679	-0.92006	-1.69098	0.0732926	0.964104
hsa-miR-146a-3p	0	3.58228	0	0	0	2.75243	0	0	0	0	0	0	0	0	0	0	0	0	0	0	0	3.33765	0	0	0	3.27469	0	0
hsa-miR-146a-5p	1.42787	2.10005	3.2531	1.99144	1.65678	-3.31256	0.311206	-0.071579	2.20737	0.181819	-0.172479	-0.102845	1.61631	-3.31256	-3.31256	-3.31256	-3.31256	-3.31256	0.777294	-3.31256	-3.31256	1.01794	0.071579	-3.31256	-3.31256	-3.31256	0.504776	0.245919
hsa-miR-146b-3p	0	0	0	0	0	0	0	0	0	0	0	0	0	3.09413	0	0	0	0	0	0	0	0	0	0	0	0	0	0
hsa-miR-146b-5p	0.13581	1.56361	1.82923	1.29805	0.460106	-1.32513	0.355781	-3.938	1.93561	0.266019	-0.544698	-0.659185	1.39704	-3.938	-3.938	-3.938	0.20601	-3.938	-3.938	1.59231	-3.938	-3.938	0.306756	-0.0659843	-3.938	-3.938	1.45685	0.0659843
hsa-miR-1470	0.548911	-0.702608	0.232752	0.135894	-0.135894	2.95415	0.217499	-4.7643	0.930269	0.21298	0.289851	0.425389	0.643238	-1.31162	-4.7643	-0.386938	-0.778105	-4.7643	0.215296	0.326479	-1.26596	-4.7643	-0.47858	0.227992	-1.71634	-4.7643	0.191787	-4.7643
hsa-miR-1471	0	0	0	0	0	3.3671	2.68061	0	3.44809	0	2.9324	0	3.03278	3.63841	0	0	0	0	0	3.28808	3.95399	3.60787	0	3.39092	0	0	0	4.38235
hsa-miR-147a	3.40684	0	0	0	0	0	0	0	0	0	0	0	0	0	0	0	0	0	0	3.58212	0	0	0	0	0	0	3.13331	0
hsa-miR-148a-3p	-0.935062	-1.03883	0.818493	0.414337	2.54218	0.688558	1.32896	-0.0733341	2.02814	-0.27114	0.261634	0.0733341	1.56198	-2.72195	-5.76463	-2.2412	1.06205	-2.74397	2.02207	2.3687	-5.76463	-0.392285	1.79197	-0.73199	-0.437072	-5.76463	2.46464	-0.502327
hsa-miR-148a-5p	0	0	0	0	0	0	0	0	0	0	0	0	2.76831	0	0	0	0	0	0	0	0	0	0	0	0	0	0	0
hsa-miR-148b-3p	0.0161245	0.87971	0.304977	0.96596	2.67666	-0.182157	0.281207	-3.39154	0.718409	-3.39154	-3.39154	-1.05189	0.823095	-3.39154	-3.39154	-3.39154	2.31232	-3.39154	1.51251	1.53192	-3.39154	-3.39154	1.15619	-0.0161245	-0.038358	-3.39154	1.48109	0.399911
hsa-miR-148b-5p	0	0	0	0	0	0	0	0	2.76744	0	0	0	0	0	0	0	0	0	0	0	0	0	0	0	0	0	0	0
hsa-miR-149-3p	-1.16986	-1.15336	-0.318293	-0.0635244	-0.357494	0.433572	0.103255	1.71499	0.337046	-0.0363692	0.336829	0.0467967	0.309747	0.847569	0.0670126	-0.875825	-0.46583	-1.33446	0.452718	0.120864	1.92433	-0.173854	-0.489017	-1.03376	-1.44481	-1.57376	0.0363692	0.859561
hsa-miR-149-5p	-3.90196	-0.193378	0.591283	-0.953089	1.59039	1.57315	1.51516	-3.90196	-0.263492	0.0461962	0.191461	0.485951	-0.0190213	-3.90196	-3.90196	0.0724507	2.47976	-3.90196	2.01612	1.60052	-3.90196	-0.140735	1.21379	-3.90196	-3.90196	-3.90196	0.0190213	0.69911
hsa-miR-150-3p	-0.324119	-0.320302	-0.697078	-0.223779	0.00513446	0.390849	0.0521313	0.391897	0.489052	0.185938	0.756187	-0.242253	0.323307	0.488916	-1.13864	-0.852897	-0.00513446	-4.67776	0.698295	-0.242701	1.10639	-0.641314	0.029879	-0.566714	-1.43671	-4.67776	0.205013	2.28678
hsa-miR-150-5p	1.34268	1.35821	1.0441	1.63507	-0.151535	-0.0695904	0.862756	-3.72722	1.92587	0.587111	0.172894	-0.422625	2.11428	0.0439718	-3.72722	0.241972	-0.0151757	-3.72722	0.224206	-0.303877	-0.183166	-3.72722	-3.72722	0.145208	-3.72722	-3.72722	0.0151757	-3.72722
hsa-miR-151a-3p	0.559862	0.425976	0.344818	1.41455	2.32669	0.0089529	-0.0089529	-0.532508	0.467605	-0.426908	-0.831767	-0.269766	-0.657759	-3.92999	-3.92999	-0.727807	2.02755	-3.92999	0.776486	1.17076	-0.51831	-3.92999	1.54	1.0198	-3.92999	-3.92999	2.4622	1.07049
hsa-miR-151a-5p	-0.145689	0.011264	-0.011264	0.522531	1.03342	0.216609	0.152955	-1.55389	0.571509	-0.125708	-0.484293	-1.37037	0.0368829	-1.47026	-5.85497	-1.12661	1.47736	-1.83981	0.323796	0.905312	-0.612482	-1.88075	1.08919	0.33263	-2.32474	-2.64444	1.6772	0.929773
hsa-miR-151b	-0.706128	-0.0127736	0.424297	0.359481	1.23123	0.113911	0.16	-0.949429	0.442945	-0.704466	-0.525988	-1.21287	0.106989	-1.59996	-5.43351	-1.36761	1.75117	-1.46526	0.0127736	0.560133	-1.1297	-1.52682	0.72495	0.0286492	-5.43351	-1.50992	1.60484	0.307941
hsa-miR-152	0.359642	1.1652	0.795877	1.48989	1.87041	0.211695	0.603968	-3.91178	1.06134	0.342755	-0.24465	-0.410119	-0.211695	-3.91178	-3.91178	-3.91178	0.965559	-0.56719	-3.91178	0.985552	-3.91178	-3.91178	0.619505	-3.91178	-3.91178	-3.91178	0.777564	1.2519
hsa-miR-1537	0	0	0	0	0	0	0	0	0	0	0	0	0	0	0	0	0	0	0	0	0	0	0	3.86669	0	0	0	0
hsa-miR-1538	-4.09591	0.157826	-0.880473	-0.540015	-0.00756325	-0.984753	-0.288629	-4.09591	0.491828	0.129287	0.108984	0.00756325	0.43324	-0.683462	-4.09591	0.861148	1.7528	-4.09591	1.00918	1.82403	0.254567	-0.248649	0.901546	-0.180818	-0.351244	-4.09591	1.57821	1.69079
hsa-miR-154-5p	0	0	0	0	0	2.84062	0	0	2.79441	0	0	0	0	0	0	0	0	0	0	0	0	0	0	0	0	0	0	0
hsa-miR-155-5p	1.78195	2.99853	2.54535	3.10025	3.98309	3.01261	-1.52914	-1.52914	2.66208	2.05519	2.61958	-1.52914	1.96633	-1.52914	-1.52914	-1.52914	1.52914	-1.52914	-1.52914	2.25093	1.70961	-1.52914	-1.52914	-1.52914	-1.52914	-1.52914	3.34989	-1.52914
hsa-miR-1587	-3.90496	-3.90496	-0.403993	0.708299	1.18431	-3.90496	0.83645	1.60201	0.116399	0.232031	1.73435	-0.409266	0.126773	0.229919	-0.654742	-3.90496	-0.116399	-3.90496	0.885722	0.161029	1.91751	1.88208	-3.90496	-3.90496	-0.638602	-3.90496	-0.221783	0.439838
hsa-miR-15a-3p	0	0	0	0	0	0	0	0	0	0	0	0	0	0	0	0	0	0	0	0	0	0	0	0	0	0	0	3.26581
hsa-miR-15a-5p	-0.223688	0.0877287	0.454817	1.44304	2.05688	0.412083	0.754172	-5.83337	1.10405	0.169965	-2.47387	-0.0877287	0.600461	-5.83337	-5.83337	-1.3542	1.86521	-0.96906	0.405042	2.14617	-5.83337	-5.83337	0.935116	-0.202082	-0.944522	-5.83337	1.67123	-2.28177
hsa-miR-15b-5p	-0.87866	0.053627	0.0775796	0.507623	0.857322	-0.629812	0.25974	-5.83611	0.572912	-0.439549	-1.11933	-1.22255	-0.053627	-5.83611	-5.83611	-0.0940095	2.51251	-1.10666	1.10646	1.99373	-2.4376	-5.83611	1.6298	1.93121	0.108198	-5.83611	2.31275	1.79368
hsa-miR-16-2-3p	3.39247	0	0	0	0	0	0	3.2679	0	0	0	0	0	0	0	0	0	0	3.60805	0	0	0	0	0	0	0	3.34574	3.79678
hsa-miR-16-5p	-0.481684	0.140509	0.252335	0.805962	1.54662	0.00961938	0.171498	-3.85919	0.737629	0.0508825	-1.5882	-1.50109	-0.100031	-4.117	-8.03951	-1.12892	1.60361	-0.995876	-0.00961938	1.78445	-3.1506	-3.03941	0.525696	0.148834	-0.660053	-4.65712	1.69742	0.141347
hsa-miR-17-3p	0	0	0	0	3.96223	0	0	0	0	0	0	0	0	0	0	0	0	0	0	4.596	0	0	3.44066	0	0	0	4.14571	0
hsa-miR-17-5p	-0.608664	-0.557222	0.650887	0.554591	1.70257	0.0341489	0.291395	-2.00802	0.924907	-0.665872	-0.743868	-0.934851	-0.0341489	-6.73133	-6.73133	-0.147559	1.62142	-0.213738	0.878945	3.02745	-1.76955	-1.40193	2.21787	2.23415	0.141047	-6.73133	2.38653	0.406643
hsa-miR-181a-3p	0	0	0	0	4.25867	0	0	3.8451	0	0	0	0	0	0	0	0	0	0	0	3.54991	0	0	0	0	0	0	3.20725	0
hsa-miR-181a-5p	-0.159367	0.537482	0.418031	0.622698	0.966985	-0.0264056	0.0746111	-5.34276	0.136271	-0.866632	-1.33065	-1.12962	-0.482017	-5.34276	-5.34276	0.0264056	1.74993	0.655516	0.401161	1.7123	-0.509665	-1.31661	1.4533	0.19799	-0.107395	-5.34276	1.72856	-1.05601
hsa-miR-181b-3p	3.59125	0	0	0	0	0	0	0	0	0	0	0	0	0	0	0	0	0	0	0	0	0	0	0	0	3.73709	0	0
hsa-miR-181b-5p	-2.61539	1.42625	1.02157	1.62356	1.15304	0.138374	0.407424	-2.61539	-0.138374	-2.61539	-2.61539	0.322333	-0.207482	-2.61539	-2.61539	-2.61539	2.228	0.5309	-2.61539	1.98782	0.909716	-2.61539	1.56126	-2.61539	1.15743	-2.61539	2.57937	-2.61539
hsa-miR-181c-5p	-2.8572	0.806931	0.528335	0.977291	1.37192	0.180692	0.0839021	-2.8572	0.571249	-0.306117	-2.8572	-0.0839021	-2.8572	-2.8572	-2.8572	0.424388	2.17949	-2.8572	0.963226	1.56181	-2.8572	-2.8572	1.13483	-2.8572	0.20317	-2.8572	1.51504	-2.8572
hsa-miR-181d	0	3.95307	3.07158	2.56457	3.11217	3.7026	0	0	2.7515	0	0	0	0	0	0	0	3.97554	0	3.70137	0	0	0	3.34733	0	0	0	4.3145	0
hsa-miR-182-3p	0	0	0	0	0	0	0	0	0	0	0	0	0	0	0	0	0	0	0	0	4.14723	0	0	3.46939	0	0	0	0
hsa-miR-182-5p	-3.3014	-3.3014	-0.350707	0.316465	0.331125	-0.0587734	-0.194695	-3.3014	0.934876	-3.3014	-3.3014	-3.3014	1.73362	-3.3014	-3.3014	0.889716	2.81496	-3.3014	1.15889	3.96334	0.0587734	0.435574	5.15579	1.57361	-3.3014	-3.3014	2.6939	1.63797
hsa-miR-1825	0	0	0	0	0	0	0	0	0	0	0	0	0	0	0	0	0	0	0	0	0	0	0	0	0	0	0	3.7112
hsa-miR-1827	4.64494	0	0	0	0	0	0	0	0	0	0	0	0	0	0	0	0	0	0	0	0	0	0	0	0	0	0	0
hsa-miR-183-3p	0	0	0	0	0	0	0	0	0	0	0	0	0	0	0	0	0	0	0	0	0	0	3.86595	3.7746	0	0	0	3.26964
hsa-miR-183-5p	0	0	2.25143	0	0	0	0	0	3.54003	0	0	0	2.9177	0	0	0	5.31952	0	3.70762	6.35332	3.81782	3.33613	7.07344	4.12856	0	0	5.28115	4.0863
hsa-miR-184	0	0	0	0	0	0	0	0	0	0	3.09466	0	2.44409	0	0	0	0	0	0	0	3.57841	0	0	0	0	0	0	0
hsa-miR-185-3p	-3.02941	-3.02941	-0.842024	-0.226064	-0.362232	1.25624	0.384283	1.00351	1.0863	0.380566	0.226064	0.845975	1.32695	1.20181	-0.346467	-3.02941	0.990411	-3.02941	1.14664	1.27727	2.42053	-3.02941	-3.02941	-3.02941	-3.02941	-3.02941	-3.02941	0.724479
hsa-miR-185-5p	-2.99837	0.591232	-0.924639	0.24253	1.08723	-2.99837	-0.143636	-2.99837	0.244683	-2.99837	0.0454444	-0.6692	0.554538	0.287561	-2.99837	-2.99837	3.11687	-0.0454444	0.904951	2.15858	0.712802	-2.99837	1.54705	-2.99837	-2.99837	-2.99837	1.90594	1.08316
hsa-miR-186-3p	0	0	0	0	0	0	0	0	0	0	2.71004	0	0	0	0	0	3.03159	0	0	3.61808	0	0	0	0	0	0	0	0
hsa-miR-186-5p	0.614914	0.701595	0.239068	1.05505	1.69733	0.0638424	0.482015	-4.07687	0.756945	-0.898607	-0.985977	-0.425609	0.0970909	-4.07687	-4.07687	-4.07687	2.03988	-4.07687	0.93273	1.49252	-4.07687	-4.07687	0.29178	-0.0638424	-0.827017	-4.07687	1.36619	-0.628437
hsa-miR-187-3p	3.90677	0	0	0	0	0	0	0	0	0	0	0	0	0	0	0	0	0	0	0	0	3.54409	0	0	0	0	0	0
hsa-miR-187-5p	-0.465112	0.250091	0.316115	0.471756	0.747963	0.724452	0.0140312	0.857575	0.453874	-0.00798807	0.00798807	-1.37653	0.579318	0.63306	-2.99847	-0.424636	-0.816029	-0.593653	-1.19856	-0.293471	-0.143937	-0.882708	-0.590254	0.0133197	-2.15729	-0.237425	0.159945	0.905667
hsa-miR-188-3p	0	0	0	0	0	0	0	0	0	0	0	0	0	0	0	0	3.49404	0	0	0	0	0	0	0	0	0	0	3.50175
hsa-miR-188-5p	0	0	0	0	2.88545	2.96066	0	0	0	2.6057	0	0	2.78456	0	0	0	0	0	0	0	3.46077	0	0	0	0	0	3.67277	4.25411
hsa-miR-18a-3p	0	0	0	0	0	0	0	0	0	0	0	0	0	0	0	0	0	0	0	0	0	0	0	0	0	0	3.84075	0
hsa-miR-18a-5p	0	0	0	0	0	2.61354	0	0	0	0	0	0	0	0	0	0	4.81998	0	0	4.02975	0	0	5.35036	3.78165	0	0	4.96392	0
hsa-miR-18b-5p	3.34996	0	0	0	2.94217	0	0	0	3.10794	0	0	0	2.89445	0	0	0	4.51543	0	0	4.26158	3.09902	0	5.36886	4.6802	0	0	5.17596	3.32491
hsa-miR-1908	-1.13761	-0.999985	0.456483	0.408429	0.0797966	-0.244009	0.47569	1.62553	0.259986	-0.0714985	0.438763	0.674338	0.193623	0.0496975	-0.780317	-0.854239	-0.0952658	-1.33139	-0.0496975	0.141108	1.15022	-0.516906	-0.414558	-1.69318	-0.8883	-1.9272	0.233234	0.467034
hsa-miR-1909-3p	-0.744044	-0.354852	0.0124953	0.519513	0.236486	-0.704995	0.378411	1.60406	0.333648	-0.000935024	0.109692	-0.348166	0.000935024	0.472116	0.230383	-0.793965	-0.551881	-1.71585	0.341906	-0.432849	1.83654	-0.351241	-0.218904	-1.48295	-1.56658	-1.51442	0.209957	0.730691
hsa-miR-1909-5p	-2.95349	-2.95349	-0.900373	-2.95349	0.167013	0.773486	0.464695	0.105973	0.507397	-2.95349	0.101528	-2.95349	0.261251	0.78544	-2.95349	0.220565	1.27456	-2.95349	-2.95349	-2.95349	0.978462	2.08027	-0.101528	2.55998	-2.95349	-2.95349	-2.95349	0.890894
hsa-miR-190b	0	0	0	0	0	0	0	3.16822	0	0	0	0	0	0	0	0	0	0	0	0	0	0	0	0	0	0	0	0
hsa-miR-191-3p	3.48839	0	0	0	0	0	0	0	0	0	0	0	0	0	0	0	3.65091	0	4.22163	3.91925	0	0	0	0	0	0	0	4.14864
hsa-miR-191-5p	-0.323554	0.459061	0.722999	0.777912	1.38007	-0.0499295	0.109403	-6.2635	0.830675	-0.589001	0.0499295	-0.651848	-0.1817	-2.37099	-6.2635	-0.252915	2.02902	-1.0236	0.528062	2.43675	-1.97384	-0.294367	1.09676	0.695121	-0.367857	-1.71671	1.6501	1.18928
hsa-miR-1910	0	0	0	0	0	0	2.47675	0	0	0	0	0	0	0	0	0	0	0	0	3.3513	0	0	0	0	0	0	0	0
hsa-miR-1911-5p	0	0	0	0	0	0	0	0	0	0	0	0	0	0	0	0	3.22721	0	0	0	0	0	0	0	0	0	0	0
hsa-miR-1912	3.79453	0	0	0	0	0	0	0	0	0	0	0	0	0	0	0	0	0	0	0	0	0	0	0	0	0	0	0
hsa-miR-1913	0.56411	0.786355	-0.715791	0.0587065	0.409531	1.02556	-0.490806	0.571287	-0.0761349	-0.321758	-0.270219	-1.81723	-0.00973868	0.443815	-1.45724	0.105539	-0.806334	-0.840615	-1.60544	0.0244844	0.79194	0.0905907	-0.399286	0.768315	-2.33432	-0.0361057	0.00973868	2.05118
hsa-miR-1914-3p	-0.108151	0.0389029	-0.649989	-0.384917	0.281467	0.497161	-0.00653047	1.79309	0.00653047	-0.169104	0.774278	-0.249454	0.0416028	0.66487	0.685548	-0.26803	0.047605	-1.08101	0.33711	-0.470294	2.46541	1.82471	-0.572382	-1.27606	-1.53083	-0.682353	-0.0547147	0.786278
hsa-miR-1914-5p	0	0	0	0	0	3.21232	0	0	0	0	0	0	0	0	0	0	2.94823	0	0	0	0	3.28358	0	0	0	0	4.57657	3.70643
hsa-miR-1915-3p	-1.18256	-1.2133	-0.202538	0.0371309	-0.623718	-0.513684	0.0318408	0.54238	0.215386	-0.0109768	0.0158949	0.273553	0.396461	-0.615284	-0.950616	-0.145791	0.137972	-1.78633	0.260056	0.913675	1.66195	-0.658439	0.0109768	-1.65162	-0.720508	-2.45608	0.449829	0.353511
hsa-miR-1915-5p	-0.274183	-0.171504	-1.11889	-0.536981	-0.0933414	0.39383	0.0683167	-1.5632	0.369743	-0.472834	0.00792512	0.539733	0.242181	0.254337	-4.96069	-0.386539	-0.0312787	-1.21199	0.256409	1.04392	0.30492	-4.96069	0.349247	0.294629	-0.00792512	-0.559877	0.253501	1.44614
hsa-miR-192-3p	3.35576	3.34316	0	0	0	0	0	0	0	0	0	0	0	0	0	0	0	0	0	0	0	0	0	0	0	0	3.10167	0
hsa-miR-192-5p	0.530571	0.236534	-0.0943281	0.418449	1.32141	-3.14392	-0.100396	-3.14392	-0.0275997	-3.14392	-3.14392	-3.14392	0.125314	-3.14392	-3.14392	0.118629	0.472108	2.30078	0.878204	1.84757	-3.14392	-3.14392	0.0275997	0.879489	-3.14392	-3.14392	1.51191	0.899916
hsa-miR-193a-3p	3.8818	0	0	3.73106	5.45098	0	3.25084	0	2.54757	0	0	2.68701	0	0	0	0	0	0	0	0	3.26042	3.76009	2.97002	0	0	0	3.10601	3.32802
hsa-miR-193a-5p	-4.07206	-0.572153	0.156683	0.327263	-0.0374459	-0.298548	0.7632	1.99616	0.110419	0.372932	-0.00756821	-0.0139635	0.554445	0.332977	0.68962	-4.07206	0.446769	-4.07206	-0.131702	0.778029	2.62648	0.00756821	-0.246151	-0.514621	-4.07206	-4.07206	0.0391835	-0.516233
hsa-miR-193b-3p	2.48068	2.96412	1.84313	2.84525	4.02819	1.47732	-1.23377	-1.23377	-1.23377	-1.23377	-1.23377	1.23377	-1.23377	-1.23377	-1.23377	3.52205	2.75271	-1.23377	2.54965	2.57056	-1.23377	-1.23377	-1.23377	2.37296	-1.23377	-1.23377	3.30194	2.20894
hsa-miR-193b-5p	-4.09306	-4.09306	-0.0411842	-0.220472	-0.694519	-1.25118	0.31041	2.01358	0.455991	0.822413	0.576678	0.266878	0.568557	1.24469	0.40963	-4.09306	-0.0946246	-4.09306	0.57329	-0.423914	2.41991	0.614245	-1.01371	-0.555539	-4.09306	-4.09306	0.0411842	0.554871
hsa-miR-194-3p	0	0	0	0	0	0	0	0	0	0	0	0	0	0	0	0	0	0	0	0	3.31403	3.3403	0	3.70773	0	0	0	3.7562
hsa-miR-194-5p	3.63071	0	0	0	2.83018	0	0	0	0	0	0	0	0	0	0	0	0	6.00628	3.72705	4.14191	0	0	3.35846	0	0	0	0	4.4927
hsa-miR-195-3p	0	0	0	0	0	0	0	0	0	0	0	0	0	0	0	0	0	0	0	0	0	0	0	3.3528	0	0	0	3.26508
hsa-miR-195-5p	0.04061	0.321663	1.09535	1.5956	1.88103	0.356181	0.590091	-3.90272	0.667188	-0.04061	-1.00957	-1.08894	0.387951	-7.04049	-7.04049	-1.81218	1.77342	-1.85445	-0.131135	1.28136	-3.52636	-2.96384	0.920106	0.731056	-1.28734	-3.30346	0.926568	-0.460283
hsa-miR-196a-3p	3.33131	0	0	0	3.30931	0	0	0	0	0	0	0	0	0	0	0	0	0	0	3.37994	0	0	0	0	0	0	0	0
hsa-miR-196a-5p	0	0	0	0	2.76871	2.65634	0	0	0	0	0	0	0	0	0	0	3.33695	0	0	4.82291	3.09902	3.75789	0	3.88911	0	0	0	0
hsa-miR-196b-3p	0	3.88384	0	2.51039	4.04437	0	0	3.96966	5.16628	0	0	0	0	0	0	0	0	0	0	0	3.75029	0	0	0	0	0	0	0
hsa-miR-196b-5p	-0.2372	0.529656	0.241797	0.726453	1.42212	0.0314238	0.409654	-4.31729	1.03036	-0.476734	-1.10136	-1.36887	0.300467	-4.31729	-4.31729	-0.688221	1.05858	-4.31729	0.654558	1.93842	0.0458267	0.500122	-4.31729	-4.31729	-4.31729	-4.31729	0.509086	-0.0314238
hsa-miR-197-3p	1.1229	0.114221	-0.206385	0.0510359	0.497682	-0.0227922	0.46079	-3.47511	-0.488678	-0.920477	-0.557763	-3.47511	0.0227922	-3.47511	-3.47511	-3.47511	2.0126	-3.47511	0.813311	0.64542	0.263758	-0.228453	0.147189	1.1867	-0.385271	-3.47511	1.57051	0.714772
hsa-miR-197-5p	-1.25672	-0.462552	0.156766	0.237465	-0.00869978	-1.47453	0.082914	1.86267	0.266985	-0.0438777	-0.241806	-0.282258	0.365738	0.300249	0.329585	-1.01479	-0.460276	-1.58201	0.320472	0.273423	2.36113	0.37173	0.00869978	-1.19163	-1.25254	-1.65781	0.601919	-0.0679476
hsa-miR-1972	-4.15918	0.0401039	-4.15918	-0.731125	0.304329	-4.15918	-0.597728	0.268014	0.309813	0.636782	-1.51378	-4.15918	1.11613	-4.15918	-4.15918	0.524135	1.56983	-4.15918	0.161583	0.557889	1.32517	0.87801	0.495109	-0.483009	-4.15918	-4.15918	0.340465	-0.0401039
hsa-miR-1973	-1.30641	-1.30641	-1.30641	1.81172	2.97699	1.30641	-1.30641	-1.30641	3.09951	-1.30641	-1.30641	-1.30641	-1.30641	-1.30641	-1.30641	4.65661	4.54735	1.99493	5.17641	5.21	2.11279	6.20842	3.80946	3.32525	-1.30641	-1.30641	-1.30641	2.73855
hsa-miR-1976	0	0	0	0	3.36198	3.27323	0	0	0	0	0	0	0	0	0	0	0	0	0	4.33621	0	3.34572	2.99189	0	0	3.20952	0	3.79728
hsa-miR-198	4.12161	0	0	0	0	0	0	3.72393	2.42734	0	0	0	0	0	0	0	0	0	0	0	3.82913	4.37687	0	3.78952	0	0	3.46525	4.18817
hsa-miR-199a-5p	1.20359	0.682967	0.463118	2.17221	2.55	-0.108248	0.797143	-1.82735	0.537874	-0.42959	-1.86794	0.490521	0.108248	-4.95287	-4.95287	-0.224423	0.720959	-0.610486	0.641623	0.536467	-1.44803	-4.95287	1.02478	-4.95287	-1.96634	-4.95287	0.645165	-1.10929
hsa-miR-199b-5p	1.28639	1.10085	-0.247463	1.75045	2.71708	-0.0864656	0.32246	-0.28962	0.916423	-1.15904	-3.71924	0.0864656	0.622756	-3.71924	-3.71924	-0.708074	1.19947	-0.195306	1.10159	0.988566	-3.71924	0.207518	0.139743	-0.274537	-3.71924	-3.71924	0.595539	-3.71924
hsa-miR-19a-3p	-2.80334	-2.80334	0.324988	0.578604	3.02026	0.0404583	0.0289756	-2.80334	1.02323	-2.80334	-2.80334	-0.0289756	0.336848	-2.80334	-2.80334	-2.80334	0.764671	-2.80334	1.45926	1.01055	-2.80334	-2.80334	1.67625	1.93078	-2.80334	-2.80334	1.95346	0.525818
hsa-miR-19b-1-5p	0	3.43617	0	0	0	0	0	0	0	0	0	0	0	0	0	0	3.1206	0	0	0	0	0	0	0	0	0	3.66589	0
hsa-miR-19b-2-5p	0	0	0	0	0	0	0	0	0	0	0	0	0	0	0	0	0	0	3.5431	0	0	0	0	3.38551	0	0	0	0
hsa-miR-19b-3p	-0.498473	-1.11778	0.358313	0.725446	2.60092	0.679813	0.812373	-2.99225	0.683648	-1.42422	-1.75827	0.414851	-0.0273691	-6.22564	-6.22564	-1.64587	0.525931	-1.01419	0.586129	1.28771	-6.22564	-2.80805	0.904148	1.22272	-1.33153	-6.22564	1.31104	0.0273691
hsa-miR-200a-3p	0.226182	-0.46919	0.683722	0.845634	2.30441	1.08778	1.30161	-5.30603	1.97987	-1.07329	-2.35236	0.92089	1.77465	-5.30603	-5.30603	-5.30603	-5.30603	-0.226182	2.12005	3.43991	-5.30603	-5.30603	0.882137	-5.30603	-0.80536	-5.30603	3.39488	1.58766
hsa-miR-200a-5p	0	0	0	0	0	0	0	0	0	0	2.92311	0	0	0	0	0	0	0	0	0	0	3.59974	0	0	0	0	0	0
hsa-miR-200b-3p	-0.653482	-0.395372	0.986424	0.804168	2.57407	0.971474	0.741526	-7.10822	1.65982	-0.709317	-1.43165	0.395372	1.42133	-7.10822	-7.10822	-2.15467	0.459281	-1.07017	1.70266	2.91947	-3.31894	-1.28701	0.587452	-2.27784	-0.713402	-1.89776	2.81312	0.591985
hsa-miR-200b-5p	0	0	0	0	0	0	0	0	0	0	0	2.55232	0	0	0	0	0	0	0	3.57909	0	0	0	0	0	0	0	0
hsa-miR-200c-3p	-1.28663	-1.60562	0.544199	-0.0355955	1.86034	0.0248545	0.0246694	-0.803473	1.10978	-1.12037	-0.484957	0.0213506	0.0953379	-2.32254	-4.30926	-0.117691	2.66969	-1.15994	1.05593	2.91894	-0.795182	0.357859	0.200226	-0.0213506	-0.344881	-2.95357	1.62216	0.237907
hsa-miR-200c-5p	0	0	0	0	0	0	0	0	0	0	0	0	0	0	0	0	3.57917	0	0	0	0	0	0	0	0	0	0	0
hsa-miR-202-3p	0	0	0	0	0	0	0	0	0	0	0	0	2.76524	0	0	0	3.64469	0	0	0	0	0	2.879	0	0	0	0	0
hsa-miR-203a	4.17359	0	2.76107	3.2368	4.95236	3.53118	2.98313	0	2.44415	0	0	0	0	0	0	0	4.93813	0	0	4.87119	0	0	4.3536	0	0	0	3.18859	3.7036
hsa-miR-203b-3p	0	0	0	0	2.75713	0	0	0	0	0	0	0	0	0	0	0	0	0	0	0	0	0	0	0	0	0	0	0
hsa-miR-203b-5p	5.35066	0	0	0	3.08423	0	0	3.16822	0	0	0	0	0	0	0	0	0	0	0	0	0	0	0	0	0	0	0	0
hsa-miR-204-3p	0.656318	0.296966	0.517417	1.31936	1.68263	-1.12667	0.904114	-0.406382	0.812813	0.374476	1.30232	-0.0461356	-0.287322	-0.320393	-2.2434	-1.61515	-0.802485	-2.95292	0.389599	-0.151009	-0.0657125	0.908747	0.367997	-1.17093	-0.377285	-2.9104	0.0461356	0.582859
hsa-miR-204-5p	1.81979	2.55792	-0.49953	2.06836	2.24168	-0.125408	0.921139	-3.04495	0.298318	1.08772	0.125408	-3.04495	-3.04495	-3.04495	-3.04495	-3.04495	0.626191	3.31799	-3.04495	1.03749	0.450988	0.673372	-3.04495	-3.04495	-3.04495	-3.04495	0.649625	-3.04495
hsa-miR-205-3p	0	0	3.26441	0	4.43368	0	0	0	0	0	0	3.37818	0	0	0	0	0	0	0	0	0	3.32304	0	0	0	0	3.13331	0
hsa-miR-205-5p	4.93785	4.22651	5.93669	4.85395	7.82929	5.40837	5.88017	-3.16518	3.04787	-3.16518	-0.13931	5.9132	2.50379	2.28596	-3.16518	-3.16518	-3.16518	-3.16518	-3.16518	0.13931	0.786635	-3.16518	-3.16518	-3.16518	-3.16518	-3.16518	0.208923	-3.16518
hsa-miR-2052	3.61552	3.49708	0	2.48841	3.65585	0	0	3.17219	0	0	0	0	0	0	0	0	0	0	0	0	0	0	0	0	0	0	3.24923	3.32237
hsa-miR-206	0	0	0	0	0	0	0	0	0	2.67548	6.00563	0	0	0	0	0	0	0	0	3.74731	0	0	0	0	0	0	0	0
hsa-miR-208b	0	0	0	2.44393	4.03327	0	0	3.30302	0	0	0	0	0	0	0	0	0	0	0	0	0	0	0	0	0	0	0	0
hsa-miR-20a-3p	3.36079	0	0	0	3.15388	0	2.45856	0	0	0	0	0	0	0	0	0	0	0	0	3.79961	0	0	0	3.59495	0	0	0	0
hsa-miR-20a-5p	-0.503303	-0.433745	1.04302	1.00709	2.16832	0.623756	0.479445	-1.79623	0.989078	-0.0271232	-0.884156	-0.174504	0.0271232	-6.11387	-6.11387	-0.0638933	1.91679	-0.284201	1.41755	3.10006	-1.79899	-6.11387	2.94341	2.3031	-0.0503372	-6.11387	2.32664	0.359014
hsa-miR-20b-3p	0	0	0	0	0	0	0	0	0	0	0	0	0	0	0	0	0	0	0	0	0	0	0	0	0	0	3.18424	0
hsa-miR-20b-5p	-0.454955	-0.461406	0.398793	0.38676	1.50443	0.646344	0.489696	-2.54335	1.24876	-0.247679	-0.449446	-0.898259	-0.0332032	-6.35936	-6.35936	-0.831524	1.43598	-0.732439	0.811952	2.74388	-1.77035	-1.80369	2.11576	1.62195	0.0341937	-6.35936	2.31491	0.0332032
hsa-miR-21-3p	0.561253	1.89727	-2.86891	0.741286	0.878353	-0.0301886	0.973271	-2.86891	1.46798	0.0301886	0.270091	-2.86891	0.367481	-2.86891	-2.86891	-2.86891	1.35222	0.163155	-2.86891	-2.86891	-2.86891	-2.86891	0.262517	0.659769	-2.86891	-2.86891	0.689726	-2.86891
hsa-miR-21-5p	-0.324771	0.775458	1.52475	2.68125	2.14027	0.107879	0.798865	-3.01028	1.11639	0.463914	-1.86905	-0.552472	0.587299	-4.75564	-9.09783	-1.49136	2.16286	-1.39401	0.428119	1.7701	-4.24026	-4.53467	1.32528	-0.107879	-2.20353	-4.59807	1.75143	-9.09783
hsa-miR-210	-0.0695876	-4.48435	-0.277824	0.0844683	0.397597	-0.469861	0.35613	-4.48435	0.301384	-0.579125	-0.0064601	0.0064601	-0.875616	-4.48435	-4.48435	-0.168884	1.46225	-4.48435	0.989312	0.943118	1.16671	0.349708	1.5015	-1.06469	0.284827	-4.48435	1.67125	2.73886
hsa-miR-211-3p	-0.0592846	0.156487	-0.900551	-0.292294	0.348076	-0.573748	-0.235105	1.98452	0.0592846	-0.658144	0.479484	-0.62952	0.156957	0.743638	0.307915	-0.804182	0.250228	-0.29479	1.00093	-4.62594	2.23889	1.59296	-0.345958	-0.56058	-0.837293	-0.411477	0.180551	0.995349
hsa-miR-211-5p	0	0	0	0	0	0	0	0	0	0	0	0	0	0	0	3.23526	0	0	0	0	0	0	0	4.25631	0	0	3.30354	3.61504
hsa-miR-2110	-0.333476	-0.680006	-1.04561	-0.16076	-0.297736	0.475583	0.025835	0.926749	0.567932	-0.025835	0.196856	-0.590046	0.551528	0.959671	-1.46839	-0.883774	-0.18946	-0.524853	0.547421	-0.0587554	1.29807	0.38544	0.106706	0.478182	-1.47334	-0.426697	0.0836303	1.87644
hsa-miR-2113	0	0	2.40965	2.3248	2.91293	0	2.66928	0	2.83495	0	0	0	0	0	0	0	0	0	0	3.40224	0	0	0	0	0	0	3.14241	0
hsa-miR-2114-3p	0	0	0	0	0	0	0	0	0	0	0	0	0	0	0	0	0	0	3.47953	0	0	0	0	0	0	0	0	3.97089
hsa-miR-2115-3p	0	0	0	0	0	0	0	0	0	0	0	0	0	0	0	0	0	0	3.57376	0	0	0	0	0	0	0	0	0
hsa-miR-2115-5p	0	0	0	0	2.68181	0	0	0	0	0	0	0	0	0	0	0	0	0	0	0	0	0	0	0	0	0	0	3.26713
hsa-miR-2116-3p	0.149719	0.684534	-3.23366	-0.0598975	0.029465	1.38533	-0.000153832	1.4025	0.0765764	-0.171901	-3.23366	-0.904491	0.410093	1.17113	-3.23366	0.208588	0.000153832	-0.0455996	-3.23366	-3.23366	1.87691	0.553013	-0.243077	1.27196	-3.23366	-3.23366	-3.23366	2.01198
hsa-miR-212-3p	1.17749	-3.1175	-3.1175	-3.1175	-3.1175	0.465725	-0.014638	-3.1175	0.333887	-0.0373247	0.460267	-3.1175	0.202866	0.861017	-3.1175	0.014638	-3.1175	-3.1175	-3.1175	0.393519	0.751721	0.335746	0.187059	1.89159	-0.140412	-3.1175	0.646088	2.13121
hsa-miR-212-5p	0	0	0	0	0	0	0	0	0	0	0	2.27651	0	3.23875	0	0	0	0	0	0	0	0	0	0	0	0	0	0
hsa-miR-214-3p	0.40575	1.25715	0.547191	1.35575	1.22103	0.507455	0.751026	-4.51559	1.51357	1.44608	1.01383	-0.205113	-0.0626011	-0.682228	-4.51559	-0.746907	0.359104	-0.831741	-0.143118	0.837337	-4.51559	-1.00173	0.0626011	-1.10007	-1.09374	-4.51559	0.101019	-4.51559
hsa-miR-214-5p	0	0	0	3.4322	4.52882	3.67921	0	3.23719	0	0	0	0	0	0	0	0	0	0	0	0	0	0	0	0	0	0	3.36409	0
hsa-miR-215	0	0	0	0	0	0	0	0	0	0	0	0	0	0	0	0	0	4.27679	0	3.56438	0	0	0	0	0	0	0	3.70925
hsa-miR-216b	0	3.5586	0	0	4.46512	0	0	3.23719	0	0	0	0	0	0	0	0	0	0	0	0	3.34653	0	0	0	0	0	0	0
hsa-miR-218-5p	3.53483	0	2.34926	4.07777	4.84047	2.96185	3.30797	0	3.07612	0	0	0	2.84398	0	0	0	3.82525	0	0	3.9684	0	0	0	0	0	0	3.10794	0
hsa-miR-219-2-3p	4.01227	0	0	0	0	0	0	0	0	0	0	0	0	0	0	0	0	0	0	0	0	0	3.36154	0	0	0	0	3.55897
hsa-miR-219-5p	0	0	0	2.71555	4.54477	0	0	3.65084	0	0	0	0	0	0	0	0	0	0	0	0	3.63574	0	0	0	0	0	3.62533	0
hsa-miR-22-3p	0.722243	0.651645	0.655394	1.87835	2.64019	0.104598	0.784169	-3.68619	0.421989	0.0534042	-0.639898	0.383118	-0.102338	-6.81581	-6.81581	-3.10072	0.421572	-2.83326	0.505525	1.02891	-2.76397	-3.4667	-0.0534042	-2.67731	-1.27583	-6.81581	1.43268	-1.81648
hsa-miR-22-5p	0	4.62386	2.89258	2.80326	4.46498	3.89874	0	0	2.38037	3.36311	0	0	2.59593	0	0	0	0	0	0	3.91582	0	0	0	0	0	0	3.32671	0
hsa-miR-221-3p	2.75671	3.68877	2.37225	3.31112	4.60798	2.04119	2.55251	-1.01246	2.2135	1.40925	1.74367	1.84986	0.304821	-1.70746	-5.12016	-1.73947	-0.250881	-1.06922	-1.18391	0.250881	-0.75506	-1.16032	-0.719634	-5.12016	-5.12016	-5.12016	0.290983	-1.10735
hsa-miR-222-3p	2.48858	3.38837	2.63012	3.15081	4.21104	1.81048	2.40055	-3.92451	2.21427	1.41777	2.10687	1.35391	0.479968	-3.92451	-3.92451	-3.92451	-0.108985	-3.92451	-3.92451	0.108985	-0.29633	-3.92451	-3.92451	-3.92451	-3.92451	-3.92451	0.619744	-3.92451
hsa-miR-222-5p	0	3.55763	0	0	0	0	0	0	0	0	0	0	0	0	0	0	0	0	0	0	0	0	0	0	0	0	0	0
hsa-miR-223-3p	1.14403	1.74953	1.38662	1.54298	1.87892	-0.590768	0.677355	-4.4907	0.654642	0.206356	-1.03835	-1.38528	0.511446	-4.4907	-4.4907	-0.157229	2.01669	-1.41123	-0.345595	0.86777	-0.763349	-1.1974	1.02721	-0.40157	-4.4907	-1.06607	1.39457	0.157229
hsa-miR-224-5p	0	3.6797	3.47421	3.82744	2.93286	0	0	0	0	3.86162	0	0	0	0	0	0	0	0	0	0	0	0	0	0	0	0	0	0
hsa-miR-2276	4.18885	0	0	0	4.17289	0	0	4.12822	0	0	2.9618	0	0	0	0	0	0	0	4.33699	0	3.14113	3.42038	0	0	0	0	0	0
hsa-miR-2277-3p	0	3.81009	0	2.75178	4.15892	3.36447	0	3.64799	0	0	0	0	0	0	0	0	0	0	0	0	3.7294	3.65856	0	0	0	0	0	3.84398
hsa-miR-2277-5p	0	0	0	2.46311	0	2.70552	0	0	0	0	0	0	0	0	0	0	0	0	0	0	0	0	0	0	0	0	0	3.70687
hsa-miR-2278	3.38422	3.69901	0	3.57139	4.26284	3.95938	0	4.52806	2.70433	0	3.10454	0	3.16369	3.23973	0	0	0	0	0	0	3.74474	4.47107	0	0	0	0	0	3.75252
hsa-miR-2355-3p	3.64109	0	0	0	2.77202	0	0	0	0	0	0	0	0	0	0	0	0	0	0	0	0	0	0	0	0	0	0	0
hsa-miR-2355-5p	0	0	0	2.82718	2.73603	3.36884	2.71217	3.92854	0	0	0	0	2.94057	4.20777	0	0	0	2.83638	0	0	3.27969	3.56408	0	0	0	0	0	4.00549
hsa-miR-2392	0	0	0	3.26102	3.37599	0	0	4.77192	2.97789	3.14782	4.97562	0	0	3.63862	3.91001	0	0	0	0	3.30908	5.14704	6.57647	0	0	0	0	0	4.00592
hsa-miR-23a-3p	1.14265	1.71628	1.26325	1.91955	2.0246	0.386506	0.79176	-3.17624	0.699416	0.287156	-0.384223	-0.216488	0.216488	-2.82158	-8.9434	-2.21124	0.24914	-1.87111	-0.912309	0.345845	-3.19233	-3.44544	1.01411	-2.30824	-2.3562	-4.85564	0.238703	-1.46936
hsa-miR-23a-5p	0	0	0	2.33625	0	0	0	3.74858	0	0	3.33992	0	0	4.68328	3.86496	3.18606	0	0	4.00131	0	4.81573	5.11902	0	0	0	0	3.10181	0
hsa-miR-23b-3p	1.00545	1.33702	0.968358	1.6686	1.74585	0.378646	0.553631	-3.2996	0.986643	0.548987	-0.107955	0.262189	0.107955	-2.4185	-9.41542	-2.36201	0.262418	-1.7387	-1.13985	0.233159	-3.44953	-4.27255	0.998554	-1.86924	-2.32362	-5.06807	-0.214038	-1.68341
hsa-miR-23c	0.925848	1.62689	2.09035	2.47457	2.32549	1.43591	1.49866	-5.97173	2.00172	1.74101	0.947675	0.324386	1.22651	-2.29834	-5.97173	-2.84852	-0.0285921	-2.5466	-1.30673	0.197549	-5.97173	-5.97173	-0.138361	-1.35371	-2.07487	-5.97173	0.0285921	-5.97173
hsa-miR-24-1-5p	0	0	0	0	3.61572	0	3.28733	0	3.74321	0	0	2.7257	0	0	0	0	3.05435	0	4.62723	3.51578	0	0	3.35107	0	3.36337	0	3.73376	4.15527
hsa-miR-24-2-5p	0	3.90758	2.68396	2.7916	3.50654	0	0	0	0	0	0	0	0	0	0	0	0	0	0	0	3.33813	0	3.40561	4.48699	0	3.56123	3.55398	0
hsa-miR-24-3p	0.750283	0.862684	0.492502	1.48398	1.63835	0.164077	0.738358	-3.64796	1.10416	0.231093	0.39512	-0.132283	0.0974939	-3.86134	-8.72016	-2.52298	-0.0974939	-2.46651	-0.385705	0.503474	-3.5288	-0.57348	0.5887	-2.64683	-2.05918	-8.72016	0.236655	-1.19816
hsa-miR-2467-3p	3.30107	3.64434	0	0	0	0	0	0	4.04374	3.09927	3.12089	0	4.1689	3.23931	0	3.24655	4.45572	0	0	0	3.32814	0	0	0	0	0	0	3.44387
hsa-miR-25-3p	-3.75165	-3.75165	0.255666	0.889163	1.87556	0.0405061	0.138395	-0.048366	1.17121	-0.454624	-0.246886	-3.75165	1.22021	-3.75165	-3.75165	-0.397115	3.26799	-0.0405061	-0.131617	1.70802	0.0955798	-0.284085	2.04505	2.78686	-0.254618	-3.75165	2.13451	1.10372
hsa-miR-25-5p	-2.61328	1.13248	-2.61328	-2.61328	-2.61328	-2.61328	-2.61328	2.23941	0.208947	0.414347	0.51847	-2.61328	0.858472	0.428589	-0.208947	-2.61328	1.21109	-2.61328	-2.61328	-2.61328	2.69123	2.04623	0.88112	-2.61328	0.433155	-2.61328	1.26531	2.28479
hsa-miR-2681-3p	0	0	0	2.59782	3.32509	0	0	0	0	0	0	0	0	0	0	0	0	0	0	3.32617	0	0	0	0	0	0	0	0
hsa-miR-2681-5p	0	0	0	0	0	0	0	0	0	0	0	0	0	0	0	0	0	0	0	0	3.18787	0	0	0	0	0	0	0
hsa-miR-2682-3p	0	0	0	0	0	0	0	0	0	0	0	0	0	0	0	0	0	0	3.98184	0	0	0	0	0	0	0	0	0
hsa-miR-26a-1-3p	0	0	0	0	0	0	0	0	0	0	0	0	0	0	0	0	0	0	0	3.45082	0	0	0	0	0	0	0	0
hsa-miR-26a-2-3p	0	0	0	0	0	0	0	0	0	0	2.57836	0	0	0	0	0	0	0	0	0	0	0	0	0	0	0	0	3.65826
hsa-miR-26a-5p	0.404348	0.886035	0.699521	1.4839	2.21501	0.627555	0.754824	-3.0568	1.18987	0.152169	-0.0471804	-0.149511	0.274377	-2.79263	-9.53352	-1.55957	1.17094	-1.04472	0.15412	1.08544	-3.98724	-3.43205	-0.278894	-0.0992342	-1.75867	-4.77769	0.0471804	-1.76364
hsa-miR-26b-3p	0	3.63751	0	0	3.95849	0	0	3.36944	0	0	0	0	0	0	0	0	3.55014	0	0	3.35108	0	0	0	3.44188	0	0	0	0
hsa-miR-26b-5p	-0.1011	0.495025	0.357251	0.99354	2.29582	0.978642	0.655753	-3.38183	1.15292	0.1011	-0.358281	-1.82552	0.284019	-3.2091	-7.41694	-1.07284	1.91164	-1.46318	0.990489	1.66546	-3.586	-1.79587	0.666109	-0.546887	-1.46957	-7.41694	0.23257	-1.04804
hsa-miR-27a-3p	0.950967	1.33566	0.894549	1.89012	2.52568	0.953296	1.19252	-3.71929	1.11115	0.357825	-0.845754	-0.140088	0.479081	-3.72688	-7.5619	-2.83831	0.140088	-1.52515	-0.859321	0.16863	-4.49102	-7.5619	0.487717	-2.25921	-3.03246	-7.5619	0.354548	-1.47226
hsa-miR-27a-5p	3.67864	0	0	0	3.71726	0	0	3.23719	3.56046	0	0	0	0	0	0	0	0	0	0	0	0	0	0	3.3546	0	0	3.36263	3.33479
hsa-miR-27b-3p	1.10823	1.52481	1.21425	2.18339	2.63879	1.2603	1.21805	-3.22263	1.44636	1.16821	-0.00317314	0.538458	0.481751	-2.57664	-7.50807	-2.3175	0.703509	-1.22606	-1.21581	0.0592782	-7.50807	-3.3316	0.00317314	-1.24755	-2.43584	-7.50807	-0.27061	-1.60236
hsa-miR-27b-5p	0	0	0	0	0	0	0	0	0	0	0	0	0	0	0	0	0	0	0	0	3.28652	0	0	0	0	0	0	0
hsa-miR-28-3p	1.31365	1.45797	1.31274	1.818	2.36502	0.778497	0.0618377	-0.0618377	1.02111	0.468348	-0.518203	-0.224985	-0.128837	-4.24413	-4.24413	-0.954111	0.966223	-4.24413	-0.263704	0.691253	-0.84935	-0.572303	0.143215	-4.24413	-0.893594	-4.24413	1.56853	0.377933
hsa-miR-28-5p	0.109003	0.290861	0.593685	1.20204	1.79099	0.208672	0.511287	-1.85325	0.355439	-0.341869	-0.977984	-1.80638	-0.0695596	-2.51408	-5.88617	-1.65931	1.52392	-2.27059	0.0578224	1.02229	-1.94423	-1.61841	0.78446	-0.0578224	-2.23604	-5.88617	1.61773	0.498569
hsa-miR-2861	-1.22369	-1.03609	-0.096211	-0.00714178	0.00714178	0.0954285	0.068208	1.36347	0.431325	0.217712	0.301919	0.461745	-0.28412	0.128469	-0.355317	-0.728532	-0.257082	-1.49706	0.0271348	0.143981	1.29797	-1.02694	-0.600353	-1.26268	-1.16386	-1.59748	0.0140538	0.450764
hsa-miR-2909	0	0	0	0	0	0	0	0	0	0	0	0	0	0	0	0	0	0	4.0939	3.3703	0	0	0	0	0	0	0	3.92764
hsa-miR-296-3p	0	0	0	0	0	2.7565	3.156	3.01509	0	0	3.14638	2.72681	2.90008	3.83419	0	2.96934	3.85694	0	4.56317	0	4.04618	0	0	0	3.28956	0	0	4.31496
hsa-miR-296-5p	0.579697	0.455876	-0.808288	-0.0987664	0.633017	1.86991	-0.247018	1.58101	-0.00509447	-0.134097	0.220926	-0.621712	0.174083	1.17927	-0.454984	0.552821	-0.68285	-0.517941	-0.22498	-0.0314654	1.64061	0.475861	-0.516138	0.946205	-1.72169	0.00509447	-0.58441	2.32177
hsa-miR-2964a-3p	0	0	0	0	0	0	0	0	0	0	0	0	0	0	0	0	0	0	0	0	0	0	0	0	0	0	0	3.55583
hsa-miR-2964a-5p	0	0	0	0	0	0	0	0	0	0	0	0	0	0	0	0	0	0	0	3.5959	0	0	3.39846	0	0	0	4.40341	3.51262
hsa-miR-297	0	0	0	0	0	2.88154	0	0	0	0	0	0	0	0	0	0	0	0	0	0	0	3.48236	0	0	0	0	0	0
hsa-miR-298	0	0	0	0	0	0	0	0	0	0	0	0	0	0	0	0	3.23014	0	0	0	0	0	0	0	0	0	0	0
hsa-miR-29a-3p	1.52738	1.38196	1.42783	2.4526	3.82152	1.32205	2.02162	-1.7279	1.28924	-0.0723933	-0.423911	1.73226	0.802554	-2.33252	-6.28322	-2.12126	1.05844	-0.758416	1.32202	0.992544	-6.28322	-1.81484	-0.360699	-2.32669	-1.49249	-6.28322	0.0723933	-1.4692
hsa-miR-29a-5p	0	0	0	2.49274	4.33726	2.75177	0	3.01337	0	0	0	0	0	0	0	0	0	0	0	0	3.56106	3.48735	0	0	0	0	0	0
hsa-miR-29b-2-5p	0	3.48498	2.36265	0	0	0	0	0	0	0	0	0	0	0	0	0	3.10061	0	0	0	0	0	0	0	0	0	0	0
hsa-miR-29b-3p	1.11794	0.462181	0.793116	1.89399	3.38915	0.948558	1.78135	-2.40044	0.967242	-0.444333	-1.21933	0.0867177	0.870452	-3.19324	-6.68587	-3.1117	0.567752	-1.46292	1.83926	1.35348	-6.68587	-2.90815	-0.0867177	-6.68587	-2.01554	-6.68587	0.429727	-2.08785
hsa-miR-29c-3p	1.06116	0.458132	0.847468	1.75082	3.57609	1.1665	1.75633	-2.04292	1.43159	-0.390094	-0.50984	1.75489	0.909566	-6.40877	-6.40877	-2.46723	0.390094	-0.971302	1.78932	1.20841	-6.40877	-1.77712	-0.390719	-0.766124	-1.39914	-6.40877	0.486694	-0.691682
hsa-miR-29c-5p	-2.9091	-2.9091	0.750269	1.24151	3.08021	0.568465	1.2135	-2.9091	0.901429	0.135589	-2.9091	0.641626	-0.135589	-2.9091	-2.9091	-2.9091	1.11394	-2.9091	0.945033	1.42464	-2.9091	-2.9091	1.17277	-2.9091	-2.9091	0.516394	1.63914	-2.9091
hsa-miR-300	0	0	0	0	0	0	2.89633	0	0	0	0	0	0	0	0	0	0	0	0	0	0	0	0	0	0	0	0	0
hsa-miR-301a-3p	0	0	0	2.81012	3.01799	0	0	0	0	0	0	0	0	0	0	0	6.09055	0	0	4.43116	0	0	0	0	0	0	3.26737	0
hsa-miR-301a-5p	0	0	0	0	0	0	0	0	0	0	0	0	0	0	0	0	0	0	0	0	0	0	0	3.33809	0	0	0	0
hsa-miR-301b	4.11363	3.55438	0	2.42494	3.79937	0	0	0	0	0	0	0	0	0	0	0	0	0	0	0	0	0	0	0	0	0	3.38791	0
hsa-miR-302a-3p	0	0	0	0	0	0	0	0	0	2.52671	0	0	0	0	0	0	3.00492	0	0	0	0	0	0	0	0	0	0	0
hsa-miR-302a-5p	0	0	0	0	0	0	0	0	0	0	0	0	0	0	0	0	0	0	0	3.39232	0	0	0	3.60518	0	0	0	0
hsa-miR-302b-3p	0	0	0	0	0	0	0	0	0	0	0	0	0	0	0	0	0	0	3.705	0	0	0	0	0	0	0	0	0
hsa-miR-302b-5p	3.79282	0	0	0	3.08516	0	0	3.30302	0	0	0	0	0	0	0	0	0	0	0	0	3.43707	0	0	0	0	0	0	3.39294
hsa-miR-302c-3p	0	0	0	0	0	0	0	0	0	0	0	0	0	0	0	0	0	0	0	0	0	0	0	3.42028	0	0	0	0
hsa-miR-302c-5p	-3.14915	-3.14915	-3.14915	-3.14915	-3.14915	0.0292612	-0.0292612	0.450224	0.267507	-0.192865	-3.14915	-3.14915	0.357369	1.31647	-0.317003	0.281644	0.214538	0.813079	0.47009	-3.14915	1.93285	0.807585	-3.14915	0.848819	-3.14915	0.877895	-3.14915	1.97911
hsa-miR-302d-5p	0	0	0	0	0	0	0	0	0	0	0	0	0	0	0	0	0	0	0	0	0	0	0	0	0	0	0	3.44387
hsa-miR-302e	0	0	0	0	0	0	0	0	0	0	0	0	0	0	0	0	0	0	0	0	0	0	0	0	0	0	0	3.50063
hsa-miR-3065-3p	0	0	0	0	2.95987	0	0	0	0	0	0	0	0	0	0	0	0	0	0	0	0	0	0	0	0	0	0	0
hsa-miR-3065-5p	4.96703	0	0	0	3.04849	0	0	0	0	0	0	0	0	0	0	0	3.11805	0	0	0	0	0	0	0	0	0	0	0
hsa-miR-3074-3p	0	0	0	0	0	0	0	0	2.5584	0	0	0	0	0	0	0	0	0	0	0	0	0	0	0	0	0	0	0
hsa-miR-30a-3p	0.453838	1.6095	0.813278	1.4624	2.16983	0.202538	1.07205	-3.56835	0.306513	0.0945576	-0.57622	-0.0945576	-0.200003	-3.56835	-3.56835	-3.56835	0.624892	-3.56835	0.604213	1.24716	-3.56835	-3.56835	-0.384914	0.161545	-3.56835	-3.56835	0.965276	-3.56835
hsa-miR-30a-5p	0.452482	0.228619	0.554162	1.20293	2.35577	0.689676	0.941366	-3.53204	0.600363	-0.490278	-0.404107	-0.0225673	0.0225673	-3.00379	-6.92612	-1.87341	1.50976	-1.48582	0.110152	1.59345	-2.52035	-1.45903	0.609323	-0.346078	-0.210776	-3.49574	1.59129	-0.295272
hsa-miR-30b-3p	1.05945	0.381537	-1.15245	-0.248381	1.07368	-0.190904	0.053571	0.663444	0.0470268	-3.26509	0.691964	-3.26509	-0.71005	0.0637744	-3.26509	-0.194481	0.290699	-3.26509	-3.26509	0.609365	1.10388	1.15742	-0.0470268	-3.26509	-3.26509	-3.26509	0.589778	1.08701
hsa-miR-30b-5p	-0.167981	-0.313885	0.326664	0.535056	1.76184	0.381633	0.281219	-0.957854	0.388613	-0.624954	-0.481956	-0.779419	-0.180033	-1.67599	-7.8884	-0.841858	1.88684	-0.980737	0.298152	1.768	-1.68924	-0.198942	1.25685	0.167981	0.243093	-1.47686	1.42543	1.09997
hsa-miR-30c-1-3p	4.57112	0	0	2.80132	3.35538	0	3.15259	0	2.44078	0	3.81876	0	0	0	0	0	3.22494	0	0	0	3.25204	5.70324	0	0	0	0	0	4.25344
hsa-miR-30c-2-3p	0	0	0	0	0	0	0	0	0	2.75666	0	0	0	0	0	0	0	0	0	0	0	0	0	0	0	0	0	0
hsa-miR-30c-5p	0.771246	0.758776	0.729768	0.924372	2.13419	0.518511	0.546989	-1.77823	0.339288	-0.601199	-0.662494	-0.984294	-0.115297	-1.37999	-7.87353	-1.81916	1.30241	-1.59349	0.118278	1.53061	-1.86913	-0.446773	0.460647	0.115297	-0.43684	-1.51135	1.3562	-0.402275
hsa-miR-30d-3p	0	0	0	0	0	0	0	0	0	0	0	0	0	0	0	0	0	0	0	0	0	0	0	0	0	0	0	3.44843
hsa-miR-30d-5p	0.382714	0.0153526	0.0541669	0.481026	1.71972	0.291917	0.440519	-2.11203	0.546314	-0.53368	-0.484958	-0.641355	-0.0153526	-1.99577	-5.31955	-0.526207	1.63891	-1.84293	0.968127	1.94892	-1.80111	-0.59804	1.29305	-0.564572	0.19593	-2.19761	1.86536	-7.82117
hsa-miR-30e-3p	0.509701	1.28872	1.24811	1.3338	2.2203	0.720499	0.919002	-3.91035	0.721491	0.17947	-0.17947	-0.530055	0.190016	-3.91035	-3.91035	-3.91035	1.62109	-3.91035	0.441364	1.74566	-3.91035	-0.518181	-0.318876	-0.24734	-3.91035	-3.91035	1.46853	-3.91035
hsa-miR-30e-5p	0.651983	0.214762	0.671089	1.28019	2.78872	0.531081	1.18068	-5.58113	0.734938	-0.515376	-0.962145	-0.00763466	0.278943	-5.58113	-5.58113	-1.9964	0.934109	-1.96023	0.00763466	1.04491	-5.58113	-5.58113	0.0597822	-0.108158	-1.9663	-5.58113	1.21104	-1.92141
hsa-miR-31-5p	0	3.38709	3.21664	4.81671	5.24334	3.24024	3.88063	0	0	0	0	3.98005	0	0	0	0	0	0	0	3.62084	0	0	0	0	0	4.0026	4.00672	3.45001
hsa-miR-3115	0	0	0	0	0	0	0	0	0	0	0	0	0	0	0	0	0	0	3.71458	0	3.64897	0	0	0	0	0	0	0
hsa-miR-3116	0	0	0	0	0	0	0	0	0	0	0	0	0	3.23931	0	0	0	0	3.70859	0	0	0	0	3.76364	0	0	0	0
hsa-miR-3121-5p	0	0	0	0	0	0	0	0	0	0	0	0	0	0	0	0	0	0	0	3.36593	0	0	0	0	0	0	0	0
hsa-miR-3122	-2.9766	-2.9766	-2.9766	-0.287656	-0.306279	-2.9766	0.709183	0.912036	0.261198	-2.9766	-0.130269	-2.9766	0.922379	1.05551	0.130269	1.12694	0.459882	-2.9766	1.64831	0.300059	1.21858	0.253433	-2.9766	0.646561	-2.9766	-2.9766	-2.9766	0.778666
hsa-miR-3123	3.41341	0	0	0	0	0	0	0	0	0	0	0	0	0	0	0	0	0	3.79471	0	0	0	0	0	0	0	0	0
hsa-miR-3124-5p	-1.20858	-1.20858	1.20858	1.4494	-1.20858	-1.20858	1.45778	2.9575	1.42532	1.81483	-1.20858	1.60975	2.32167	-1.20858	1.68386	1.83497	2.07972	-1.20858	-1.20858	2.27994	3.68435	-1.20858	-1.20858	-1.20858	-1.20858	-1.20858	2.57549	-1.20858
hsa-miR-3126-5p	0	0	0	3.02312	2.64665	3.277	3.16992	0	3.23305	3.21147	4.85733	0	3.02428	3.49286	0	0	3.76341	0	0	0	0	3.92404	0	0	0	0	3.20549	4.28805
hsa-miR-3127-3p	0	0	0	0	0	3.95762	0	0	2.47453	2.55285	2.71775	0	0	0	0	0	0	0	4.46501	0	0	0	0	0	0	0	0	4.57874
hsa-miR-3130-3p	0	0	0	0	4.2821	3.45103	0	4.01185	0	0	0	0	0	0	0	0	0	0	0	0	3.17755	0	0	0	0	0	0	3.32491
hsa-miR-3130-5p	-3.44645	1.00146	-0.307753	0.0136197	0.795118	1.28943	0.159305	-3.44645	0.429619	0.723534	1.26354	-0.162198	0.0327684	-3.44645	-3.44645	0.273135	-0.304332	-0.479	-3.44645	0.821035	-0.0136197	0.769057	-0.331924	0.398783	-3.44645	-3.44645	-3.44645	0.900445
hsa-miR-3131	-0.101934	-0.0435091	-0.632328	-0.598772	0.44969	1.26221	0.825191	-0.247501	0.279033	-0.541867	0.476061	0.917903	0.313653	0.777544	-1.05371	0.00585302	0.116603	-4.49435	-0.155166	0.411723	1.03085	2.0489	-0.430076	-0.00585302	-4.49435	-4.49435	-4.49435	1.47301
hsa-miR-3132	0	0	0	0	0	0	0	0	2.42741	0	0	0	0	0	0	0	0	0	0	0	0	0	0	0	0	0	0	0
hsa-miR-3135a	0	0	0	0	0	0	0	0	0	0	0	0	0	0	0	0	0	0	3.6875	0	3.53952	3.28743	0	0	0	0	0	3.33296
hsa-miR-3135b	-0.317336	0.00810225	0.206599	0.34806	0.474581	-1.19258	0.156203	0.482463	0.013359	-0.129376	0.583517	-0.0240874	0.814466	-0.431718	-1.72374	-0.00810225	0.473159	-1.51016	2.12511	0.526888	0.721797	0.931476	-0.0971177	-3.31997	-0.717434	-7.06305	-0.308163	-0.670213
hsa-miR-3136-3p	0	0	0	0	0	0	0	0	0	0	0	0	0	0	0	0	0	0	0	0	0	3.27823	0	0	0	0	0	0
hsa-miR-3136-5p	0	0	0	0	0	0	0	0	0	0	0	0	0	0	0	0	3.21411	0	0	0	0	0	0	0	0	0	0	0
hsa-miR-3137	0	0	0	2.6485	0	0	0	0	0	0	0	0	0	0	0	0	0	0	0	0	3.06457	0	0	0	0	0	3.40046	0
hsa-miR-3138	0	0	0	0	3.77511	0	0	0	0	0	0	0	0	0	0	0	0	0	0	0	0	3.2489	0	0	0	0	3.43102	0
hsa-miR-3140-3p	0	0	0	0	0	0	0	0	0	0	0	0	0	0	0	0	0	0	3.50425	0	0	0	0	0	0	0	0	0
hsa-miR-3141	-1.14387	-1.12068	0.00152305	0.0485474	-0.246196	-1.16574	0.704146	2.43395	0.32414	0.25472	0.32257	0.321831	0.557764	1.23776	0.532064	-0.698875	-0.122952	-1.02964	-0.302731	-0.00152305	2.05251	0.564585	-0.81767	-1.23998	-1.44549	-1.21917	-0.1907	0.507027
hsa-miR-3144-3p	0	0	0	0	0	0	0	0	0	0	0	0	0	0	0	0	3.67163	0	0	0	0	0	0	0	0	0	0	0
hsa-miR-3144-5p	0	0	0	0	0	2.61653	0	0	3.08146	2.9578	2.91117	2.344	2.72895	3.37222	0	0	0	0	0	0	0	0	0	0	0	0	0	0
hsa-miR-3147	-2.88884	-2.88884	-2.88884	-2.88884	-2.88884	0.617977	-2.88884	1.90485	0.353256	0.958557	0.0694738	-0.0694738	0.67352	1.51613	1.05723	-2.88884	0.160918	0.091399	-2.88884	-2.88884	1.88769	-2.88884	0.274128	-2.88884	-2.88884	-2.88884	0.46544	0.955226
hsa-miR-3150a-3p	-3.29938	-3.29938	-1.12326	0.112517	1.25273	-0.375028	-0.112517	0.451865	0.810031	0.613097	0.305233	1.16268	0.600953	0.407868	-3.29938	-3.29938	0.172563	-3.29938	0.624973	-3.29938	1.41187	1.87093	-0.264692	-3.29938	2.10324	-3.29938	-3.29938	-3.29938
hsa-miR-3150b-5p	0	0	0	0	2.65708	3.36663	0	0	0	0	2.95864	0	0	0	0	0	3.06656	0	3.65459	4.41774	3.51708	3.94391	0	0	0	0	0	4.52122
hsa-miR-3151	-0.573895	-0.438211	-0.371362	-0.064292	0.064292	-4.5598	-0.132621	1.47081	0.591668	0.111404	0.243342	0.191728	0.777984	0.520423	0.528377	-0.467446	-0.176821	-1.6224	0.573205	0.219701	2.06416	-0.259405	-0.570123	0.258978	-1.47368	-4.5598	-0.261184	0.829328
hsa-miR-3152-5p	0	0	0	0	0	0	0	0	0	0	0	0	0	0	0	0	0	0	0	0	0	0	0	3.5122	0	0	0	0
hsa-miR-3153	0	0	0	0	0	0	0	3.65369	0	0	0	0	2.70562	0	0	0	3.04539	0	0	0	3.81639	3.65291	0	0	0	0	0	0
hsa-miR-3154	-0.496422	0.712026	-0.912619	-0.509944	0.0115253	0.301271	-0.0900171	0.703556	0.0977212	-0.0115253	-0.224976	-1.81961	0.133016	1.24315	-1.74459	-0.923894	-0.602941	-0.160773	-1.78589	0.357947	1.12188	0.684861	-0.796819	0.474449	-0.822032	0.911572	0.306349	1.08873
hsa-miR-3155b	3.5468	0	0	0	2.78311	0	0	3.05085	0	0	0	0	2.71205	0	0	0	3.11284	0	0	0	0	3.45604	2.86068	0	0	0	0	3.50938
hsa-miR-3156-5p	0	0	0	0	0	0	0	0	3.03863	2.68895	3.44722	0	2.59592	3.56747	0	0	0	0	3.59693	0	0	0	0	0	0	0	0	0
hsa-miR-3157-3p	0	0	0	0	0	0	0	0	0	0	0	0	0	0	0	0	0	0	0	0	0	0	0	0	0	0	3.61567	0
hsa-miR-3158-5p	-3.54687	-3.54687	-1.15566	-1.17388	0.569657	0.709397	0.286296	0.849454	0.281917	0.103986	1.03952	-0.981837	0.526433	1.49432	-3.54687	-0.454535	0.149418	-3.54687	-3.54687	-0.103986	1.04187	1.36816	-0.205468	0.417873	-0.38693	-3.54687	-3.54687	3.8769
hsa-miR-3159	3.28867	0	0	0	0	0	0	0	0	0	0	0	0	0	0	0	0	0	0	0	0	0	0	0	0	0	0	0
hsa-miR-3160-3p	0	0	0	0	0	3.97721	2.77621	0	0	2.52283	2.56157	0	2.4581	3.24098	0	0	0	0	0	3.3564	3.62708	0	0	3.68624	0	0	0	4.34877
hsa-miR-3162-3p	1.42544	0.3141	0.456269	-0.124536	0.168901	3.89506	-0.0751386	-1.02582	0.672142	-0.074299	0.672091	1.60416	1.06579	0.074299	-4.03648	-0.572622	-0.273063	-0.99914	-0.163673	-0.273198	-0.576295	-4.03648	0.643456	0.688718	-4.03648	-0.815536	0.185566	0.371423
hsa-miR-3162-5p	-0.929305	-5.03474	-0.825363	-0.15614	0.0493214	-1.58367	0.234635	1.29323	-0.231091	-0.907697	0.67411	-1.16296	0.0384361	1.5746	0.955027	-0.00201236	-0.342845	-2.19247	0.855201	0.00201236	2.96726	1.80168	0.0588468	-5.03474	-1.88131	-5.03474	0.188121	0.0782339
hsa-miR-3163	5.33083	0	0	0	0	0	0	0	0	0	0	0	0	0	0	0	0	0	0	0	3.23025	3.92656	0	0	0	3.21812	0	0
hsa-miR-3167	0	3.55356	0	0	0	0	0	0	0	0	0	0	0	0	0	0	0	0	0	0	0	0	0	0	0	0	0	0
hsa-miR-3170	0	0	0	0	0	0	0	0	0	0	0	0	0	0	0	0	0	0	0	0	3.34717	0	0	3.41056	0	0	0	0
hsa-miR-3171	0	3.50228	0	0	0	0	0	0	0	0	0	0	0	0	0	0	0	0	0	0	0	0	0	0	0	0	0	0
hsa-miR-3173-3p	0	0	0	0	0	0	0	0	0	0	0	0	0	0	0	3.14512	0	0	0	0	0	0	0	0	0	0	0	0
hsa-miR-3173-5p	0	0	0	0	0	0	0	0	0	0	0	0	0	0	0	0	0	0	0	3.79537	0	0	0	0	0	0	0	0
hsa-miR-3175	-0.147168	1.40052	0.179814	0.860639	1.98219	0.099351	-0.922979	-1.19851	2.90937	1.98782	1.5523	-0.154224	-1.0702	-0.0604982	-1.20046	-0.372542	-0.149947	-0.557957	-0.775572	1.61634	1.07051	1.47058	0.0604982	-1.83584	0.405888	-5.80687	1.55451	-0.0770336
hsa-miR-3176	-4.50411	-0.498958	-0.724378	1.19001	0.366448	-0.77817	1.35002	-0.355213	0.842309	0.590274	0.961655	0.342082	0.0569733	-0.250019	-4.50411	-1.2663	-0.0569733	-4.50411	1.41656	0.481234	-0.331999	-4.50411	1.22142	0.317109	-4.50411	-4.50411	0.53236	0.677229
hsa-miR-3177-3p	0.176631	1.34946	-1.38199	0.053748	-0.298419	0.269868	0.337159	0.828103	0.597824	-0.0674976	-0.0139161	-3.72781	-0.104268	0.305106	-3.72781	-0.506183	-0.557489	-3.72781	0.227039	-0.0818913	0.913546	0.177288	-0.783546	0.351395	-3.72781	0.0139161	-0.57312	1.27188
hsa-miR-3177-5p	0	3.49919	0	0	0	0	2.69511	3.20042	0	0	0	0	3.01313	3.56736	0	3.41181	0	0	0	0	4.71482	0	0	0	0	0	0	4.65087
hsa-miR-3178	-0.785334	-0.615027	0.729367	0.678529	0.552234	-0.685767	0.267847	1.69278	0.0451544	-0.689964	0.0078509	0.219012	-0.0078509	-0.484707	-0.12303	-0.972364	-0.333119	-1.6378	1.50313	0.0564089	1.59798	-0.639256	0.541606	-1.15951	-1.31876	-1.60115	0.720658	0.922774
hsa-miR-3180	-0.98738	-0.643291	-0.0792642	-0.0863967	-0.307174	-0.157773	0.0384154	2.0717	0.605705	0.292693	0.635888	-0.0384154	0.698666	0.697963	0.253741	-0.534712	0.162297	-0.594373	0.596993	0.465554	2.07635	-0.222632	-0.267126	-0.411354	-0.845907	-1.1754	0.485241	0.751837
hsa-miR-3180-3p	-0.920044	-0.656526	0.003177	0.384109	-0.0348971	-0.421429	0.308026	1.98174	0.409179	-0.003177	0.12398	-0.171986	0.456776	0.632798	0.195246	-0.63873	-0.25391	-1.10402	0.689864	1.40699	1.88997	-0.461749	-0.337211	-0.567198	-1.32221	-1.42581	0.27763	0.931267
hsa-miR-3180-5p	0	0	2.05735	2.60327	0	4.83536	3.2118	3.48739	2.87558	0	2.78545	3.36099	3.30771	0	0	0	0	0	0	0	0	0	0	0	0	0	0	4.25574
hsa-miR-3181	0	0	0	0	0	2.75648	0	0	2.36204	2.57677	2.58416	0	0	0	0	0	0	0	0	0	3.67988	0	2.81089	0	0	0	0	0
hsa-miR-3183	0	3.55653	2.77791	2.81964	3.2121	3.70504	3.7701	3.36597	4.17274	0	0	0	3.7604	0	0	0	0	0	0	4.11648	3.25061	0	0	0	0	0	3.54996	3.88939
hsa-miR-3184-3p	0	0	0	0	0	3.2742	0	3.09159	0	0	0	0	0	0	0	0	0	0	3.68913	0	3.60274	0	0	3.87988	0	0	0	3.75262
hsa-miR-3184-5p	-0.0551208	-0.40676	0.240892	0.649621	0.527771	1.64065	0.131037	0.442425	0.488504	0.228177	0.688835	0.468878	0.507671	-0.703833	-0.9772	-0.820196	-0.416352	-4.47638	-4.47638	0.00473991	0.573266	-0.564955	-0.568192	-0.699056	-4.47638	-4.47638	-0.00473991	1.02476
hsa-miR-3185	-1.17862	-0.887219	0.386049	0.168001	-0.332721	0.691242	0.647961	1.68713	0.827226	0.58298	0.630826	0.85201	0.824121	0.128971	-0.467252	-1.38591	0.0878283	-1.81097	-0.334942	0.089063	2.03119	-0.878575	-0.344154	-2.2349	-1.16864	-2.55294	-0.157887	-0.0878283
hsa-miR-3186-3p	-0.139276	0.326739	-0.141058	0.267193	1.26229	-1.31258	0.0258662	1.22922	0.0771625	-0.293829	0.0458365	-0.667868	-0.319575	0.34053	-1.19924	-4.02227	-0.621141	-0.391605	-0.0258662	0.198003	1.53306	0.648575	-4.02227	-4.02227	-0.857391	0.778129	0.319782	0.414148
hsa-miR-3186-5p	0	0	0	0	0	0	2.36832	0	0	0	0	0	0	0	0	0	0	0	0	0	3.06379	0	0	3.70176	0	0	0	3.6578
hsa-miR-3187-3p	0.32513	-0.457268	0.507431	0.003625	0.647986	2.26263	-0.185854	2.066	-0.29518	-0.936517	-0.170221	0.335238	-0.003625	0.224383	-0.278391	-1.07528	-0.24221	-0.655562	1.15888	1.02959	2.69884	1.49932	-0.5138	-0.918492	-0.876511	-0.858859	0.818486	0.059921
hsa-miR-3187-5p	-3.71005	-3.71005	0.282913	-0.0520858	0.0520858	0.229503	-0.346056	1.64741	0.419136	0.318359	0.611349	0.326825	0.586932	-0.297595	-0.084305	-0.383373	0.852676	-3.71005	-3.71005	1.11727	2.5953	0.101147	-0.533259	-3.71005	-0.79092	-3.71005	-3.71005	0.297737
hsa-miR-3188	-0.100742	0.0255937	0.335582	0.954779	0.917459	-0.195938	1.12628	2.18449	0.536284	-0.0255937	0.860779	-0.111073	0.32057	1.29441	-0.132068	-1.61398	-0.711417	-1.01075	0.275686	-0.448578	1.91116	0.534267	-0.317632	-0.924904	-1.48086	-0.907252	-0.48458	0.739445
hsa-miR-3189-3p	-2.37263	1.00482	-2.37263	0.0711954	-2.37263	-2.37263	1.07909	3.38823	0.0904127	-2.37263	0.471256	-2.37263	0.829372	2.42485	-0.0711954	-2.37263	0.943947	0.9878	-2.37263	-2.37263	2.68241	2.2422	-2.37263	2.15644	-2.37263	-2.37263	-2.37263	2.29949
hsa-miR-3189-5p	0	4.0399	0	0	0	3.30553	0	0	0	0	0	0	0	3.19314	0	0	0	0	0	0	0	3.54369	2.99925	0	0	0	0	0
hsa-miR-3190-3p	0	0	0	0	0	0	0	0	0	0	0	0	2.65131	0	0	0	0	0	0	3.54507	3.11289	0	0	0	0	0	0	0
hsa-miR-3190-5p	3.35476	3.67329	0	2.54372	3.28152	0	0	4.12822	0	0	0	0	0	0	0	0	0	0	0	3.77228	3.35053	0	0	0	0	0	0	4.37908
hsa-miR-3191-3p	-4.12789	0.0267467	-0.63356	-0.0267467	-0.202705	0.279354	0.0851292	0.941108	0.597229	0.0547018	0.974004	-0.412747	0.594093	1.02704	-1.58726	-0.483021	-4.12789	-0.293638	0.121504	0.635811	1.06855	0.385647	-0.203274	-0.0721982	-4.12789	-0.268244	-0.114757	1.60345
hsa-miR-3191-5p	0	0	0	0	0	0	0	0	0	0	0	0	0	0	0	0	0	0	0	0	3.73581	0	0	0	0	0	0	0
hsa-miR-3193	0	0	0	0	2.93656	0	0	0	0	0	0	0	0	0	0	0	0	0	0	3.37843	0	3.26787	0	0	0	3.4817	3.11595	0
hsa-miR-3194-3p	0	0	0	0	0	0	0	0	0	0	0	0	0	0	0	0	0	0	0	0	0	0	0	0	0	0	0	3.65972
hsa-miR-3194-5p	-4.16854	-0.141348	-0.989478	-0.365017	-0.06114	0.00471832	0.215635	0.1491	0.429158	0.184657	0.916503	-0.186636	0.947215	0.998425	-1.323	-0.00471832	0.33273	-0.90244	-0.15796	-0.269542	0.885511	0.792046	0.0139265	-0.299235	-1.20214	-4.16854	0.165321	1.56189
hsa-miR-3195	0.198039	-0.340943	0.118859	0.740358	0.717204	0.121308	0.669179	-0.671982	0.0436534	-0.377287	0.447082	0.356812	-0.0951418	-0.73861	-2.47973	-1.16453	0.0734327	-2.42329	1.09899	0.251758	-0.658198	-0.812761	-0.0436534	-1.52186	-0.975911	-2.77465	0.278186	0.405879
hsa-miR-3196	-1.62716	-0.78285	0.0210564	0.0271626	-0.0514423	0.615654	-0.0217911	1.26147	0.357216	0.244449	0.213676	0.585254	0.295326	-0.175287	0.00582059	-0.0537185	0.125316	-1.26717	-0.00582059	-0.134319	1.51499	-0.618404	-0.330429	-1.21378	-0.950606	-1.30306	0.188368	0.901609
hsa-miR-3197	-0.951295	-1.05284	0.0384067	-0.00849733	-0.20546	-0.0509882	0.221181	1.59973	0.440359	0.00849733	0.896645	0.255818	0.41418	0.517417	-0.187547	-1.00073	-0.0926539	-1.2055	0.639413	0.229104	1.71185	-0.0361446	-0.145253	-1.15015	-1.02834	-1.52547	0.27847	0.459928
hsa-miR-3198	0	0	0	0	0	0	0	0	2.68824	0	3.63189	0	3.04877	3.77197	0	0	3.21286	0	0	0	3.2402	0	0	0	0	0	0	0
hsa-miR-3199	0	0	0	0	0	0	0	0	2.90426	0	0	0	0	4.23024	0	0	0	0	0	0	0	0	0	0	0	0	0	0
hsa-miR-32-5p	0	0	0	0	2.64597	0	0	0	0	0	0	0	0	0	0	0	0	0	4.21938	0	3.09442	3.47234	0	0	0	0	0	0
hsa-miR-3200-3p	0	0	0	0	0	3.79542	0	0	0	0	0	0	0	3.14456	0	0	0	0	0	0	0	0	3.09937	0	0	3.26915	3.35308	3.38589
hsa-miR-3202	0	0	0	0	0	0	0	0	0	2.52852	0	0	0	0	0	0	3.21867	0	0	0	3.08502	0	0	0	0	0	0	0
hsa-miR-320a	0.956269	1.49113	0.732482	1.2102	1.88613	0.430896	0.277462	-1.15822	0.841122	0.162425	0.582501	0.179769	-0.857776	-0.241189	-4.6456	-1.48611	0.0123658	-4.6456	-0.460301	-0.604372	-0.0360574	-0.0123658	-0.314074	-4.6456	-1.03418	-4.6456	0.321268	0.100005
hsa-miR-320b	0.317317	1.23371	0.482098	1.10476	1.60417	0.241642	0.495268	-3.93387	0.981664	0.103106	0.675863	0.517025	-3.93387	-0.295242	-3.93387	-3.93387	0.490201	-3.93387	-0.35063	0.019945	-0.687394	-0.019945	-0.637199	-3.93387	-3.93387	-3.93387	-0.469514	0.32121
hsa-miR-320c	0.193437	1.03554	0.609903	0.820495	1.68945	0.0183963	-0.0183963	-3.58831	0.267891	0.289711	0.191073	0.416089	-3.58831	-0.0212858	-3.58831	-3.58831	0.30274	-3.58831	-3.58831	0.127192	-3.58831	0.87733	-0.49612	-3.58831	-0.652738	-3.58831	0.135493	-3.58831
hsa-miR-320d	2.41751	3.45632	2.77334	3.24249	3.71729	-1.41326	2.25758	-1.41326	2.56196	3.10053	1.41326	2.42811	-1.41326	-1.41326	-1.41326	-1.41326	2.04198	-1.41326	-1.41326	2.41381	1.99411	-1.41326	-1.41326	-1.41326	-1.41326	-1.41326	3.08473	-1.41326
hsa-miR-320e	1.16024	1.31157	1.27057	1.61244	2.22262	0.189723	1.17473	-3.34383	1.30236	1.43795	0.999697	0.866062	-0.216417	-3.34383	-3.34383	-0.289784	0.484911	-3.34383	-3.34383	0.0491306	-0.0491306	-3.34383	-0.221889	-3.34383	-3.34383	-3.34383	0.882559	-3.34383
hsa-miR-323a-3p	0	3.87775	0	0	0	0	0	0	0	0	0	0	0	0	0	0	0	0	0	0	3.22169	0	0	0	0	0	0	0
hsa-miR-323a-5p	3.61957	0	0	0	0	3.74857	0	0	0	0	3.06086	0	0	0	0	0	0	0	4.4018	3.39513	3.18056	0	0	0	0	0	0	3.49961
hsa-miR-323b-5p	4.11016	3.58998	0	0	2.75945	0	0	0	0	0	0	0	0	0	0	0	0	0	0	0	0	3.52207	2.83324	0	0	0	3.30366	0
hsa-miR-324-3p	-3.16959	-3.16959	-0.455908	0.208208	1.11394	0.436753	0.303461	-3.16959	0.730633	0.791145	0.919854	0.0344	0.564916	-3.16959	-3.16959	0.239012	1.92045	-3.16959	-3.16959	0.871646	-3.16959	-3.16959	-0.122542	-3.16959	-0.0344	-3.16959	0.328506	1.11716
hsa-miR-324-5p	0.845735	0.460117	-0.383815	-2.91744	1.48366	0.226662	0.518597	-2.91744	0.242543	-0.226662	-2.91744	0.545463	-0.304397	-2.91744	-2.91744	-2.91744	2.78992	0.38973	-2.91744	1.59219	-2.91744	-2.91744	0.63194	0.469065	-2.91744	-2.91744	1.33438	1.39787
hsa-miR-325	0	0	0	0	0	2.83809	0	0	0	0	0	0	0	0	0	0	0	0	0	0	0	0	0	0	0	0	0	3.27287
hsa-miR-326	0	3.91171	0	3.23336	4.12681	0	0	3.27161	0	0	0	0	0	0	0	0	3.89558	0	4.30281	0	3.25061	0	0	3.41826	0	0	4.67617	3.32929
hsa-miR-328	0	0	0	0	0	0	0	0	0	0	0	0	0	0	0	0	0	0	0	0	0	3.28358	3.23945	0	0	0	0	0
hsa-miR-330-3p	3.42714	0	0	0	0	0	0	0	0	0	0	0	0	0	0	0	3.23249	0	0	3.37076	0	0	0	0	0	0	0	0
hsa-miR-330-5p	0	0	0	0	0	0	0	0	0	0	0	0	0	0	0	0	0	0	3.7255	0	0	0	0	0	0	0	0	0
hsa-miR-331-3p	0.608751	-0.449386	-0.125766	0.0351065	1.19381	0.323249	0.125157	-4.06753	0.596821	-0.0351065	-0.885792	-0.973413	0.283353	-4.06753	-4.06753	-0.471562	3.14463	-4.06753	0.993531	1.61472	-0.80853	-4.06753	0.836214	0.230912	-1.08451	-4.06753	1.77429	0.3966
hsa-miR-335-3p	0	0	0	0	0	0	0	0	0	0	0	0	0	0	0	0	0	0	0	0	0	0	0	3.84523	0	0	0	0
hsa-miR-335-5p	-0.0748229	-3.36905	0.77703	0.189375	3.06522	0.0832523	1.07244	-3.36905	0.529029	-3.36905	-3.36905	-0.930207	0.208536	-3.36905	-3.36905	-3.36905	2.06217	-0.368457	1.79422	0.360905	-3.36905	-3.36905	2.0079	2.1269	-3.36905	-3.36905	1.50411	0.0748229
hsa-miR-337-3p	0	0	0	0	0	0	0	0	0	0	0	0	0	0	0	0	0	0	0	0	0	0	0	0	0	0	3.23773	0
hsa-miR-337-5p	0	0	0	0	2.97167	0	0	0	0	0	0	0	0	0	0	0	0	0	0	0	0	0	0	0	0	0	0	0
hsa-miR-338-3p	0	0	3.93875	4.2298	5.8879	4.70148	3.7234	0	0	3.13057	0	4.15828	0	0	0	0	4.09469	0	0	5.12685	0	0	5.44911	0	0	0	4.46051	3.39063
hsa-miR-339-3p	0	0	0	0	0	0	0	0	0	0	0	0	0	3.23931	0	0	0	0	0	0	3.11446	0	0	0	0	0	0	0
hsa-miR-339-5p	0	0	0	0	3.68391	0	3.03174	0	2.6126	0	0	0	2.70884	0	0	3.34236	4.64931	0	0	3.90234	0	0	5.22181	0	2.96114	0	4.12596	4.98045
hsa-miR-33a-3p	0	0	0	0	2.82419	0	0	0	0	0	0	0	0	0	0	0	0	0	0	0	0	0	0	3.53521	0	0	3.14751	0
hsa-miR-33a-5p	0	0	0	0	4.10947	2.95832	0	0	0	0	0	0	0	0	0	0	3.76302	0	0	0	0	3.5587	0	3.90039	0	0	3.87993	0
hsa-miR-33b-3p	0	0	0	0	0	0	0	0	0	0	0	0	0	0	0	0	0	0	0	0	0	0	0	3.5878	0	0	3.52736	3.84655
hsa-miR-33b-5p	0	0	0	0	0	0	0	0	0	0	0	0	0	0	0	0	0	0	0	0	0	0	0	0	0	0	3.19064	0
hsa-miR-340-3p	0	0	0	0	0	0	0	0	0	0	0	0	0	0	0	0	3.44935	0	0	3.58137	0	0	0	0	0	0	0	3.26581
hsa-miR-340-5p	0	3.44427	0	2.89577	3.17227	0	0	0	0	0	0	0	0	0	0	0	0	0	0	3.35863	0	0	0	0	0	0	0	0
hsa-miR-342-3p	0.612202	1.50682	1.19484	2.02808	1.52047	-0.0827377	0.552317	-5.30531	0.506571	0.280142	0.0827377	-0.986275	0.687981	-1.41226	-5.30531	-0.892604	1.2923	-1.04258	-0.319881	1.33282	-2.01061	-1.28348	0.239947	-0.641174	-1.18889	-1.6461	0.911778	-0.488663
hsa-miR-342-5p	0.00151011	1.02989	-1.1527	-0.167141	1.01889	0.423082	-0.00151011	1.54988	-0.166157	-0.537459	0.196124	-0.244065	0.100576	1.69285	-3.34778	-3.34778	-3.34778	-0.215449	0.572861	-3.34778	1.56095	1.11534	-3.34778	0.412462	-3.34778	0.355987	-0.148143	0.49363
hsa-miR-345-3p	-3.73253	-3.73253	-3.73253	-3.73253	-3.73253	-0.556635	-0.649346	1.7672	0.934845	0.158814	0.756913	-0.548751	0.788462	1.01752	-0.336665	0.341363	0.644422	-0.793229	0.0100401	-0.411811	2.19817	0.284253	-0.122227	1.62424	-3.73253	0.261257	-0.0100401	0.704747
hsa-miR-345-5p	3.66996	0	2.05623	0	2.99942	0	2.96502	0	2.70427	0	0	0	2.90104	0	0	0	5.85276	0	4.15111	0	0	3.86848	3.58687	0	0	0	4.73684	3.26641
hsa-miR-346	0.140911	0.599827	-0.4649	-0.300228	-0.2456	0.563848	0.230798	-3.27411	0.329812	-3.27411	0.0398236	-3.27411	0.402197	0.399392	-3.27411	-0.0470628	-0.0398236	-3.27411	-3.27411	0.442613	-3.27411	-3.27411	0.672312	1.77803	-3.27411	1.05505	0.649405	1.66263
hsa-miR-34a-3p	0	0	0	0	0	0	0	0	0	0	0	0	0	0	0	0	0	0	0	3.39492	0	0	0	0	0	0	0	0
hsa-miR-34a-5p	-0.0534277	1.32169	0.385314	1.31422	1.55542	0.270068	0.828095	-5.11357	1.25677	0.81758	-0.422476	-0.495097	-0.370099	-1.37325	-5.11357	-0.923538	0.866283	-0.812936	0.225256	0.732186	-1.3847	-1.17354	0.425402	-5.11357	-0.187996	-5.11357	1.10368	0.0534277
hsa-miR-34b-3p	0	0	0	0	0	0	0	0	0	0	0	0	0	0	0	0	0	0	0	0	3.56221	0	0	0	0	0	0	0
hsa-miR-34b-5p	-3.04909	1.64246	0.633701	1.76264	1.78963	0.584053	1.49485	-3.04909	1.63049	1.03564	-0.0130234	0.592197	-0.017991	-3.04909	-3.04909	-3.04909	1.59627	-3.04909	-3.04909	-3.04909	0.522594	-3.04909	0.430725	-3.04909	0.0130234	-3.04909	1.47505	-3.04909
hsa-miR-34c-3p	3.46722	4.43407	0	0	0	0	0	0	0	0	0	0	0	0	0	0	3.24684	0	0	3.84329	0	0	0	0	2.99042	0	3.42778	3.26832
hsa-miR-34c-5p	0	0	0	0	0	0	0	0	0	0	0	0	0	0	0	0	0	0	0	0	0	3.27286	0	0	0	0	0	0
hsa-miR-3605-3p	0	0	0	0	0	3.65906	0	0	0	0	0	0	0	0	0	0	0	0	0	0	0	0	0	0	0	0	0	0
hsa-miR-3605-5p	0	0	0	0	0	0	2.49276	0	0	0	3.40254	0	2.40789	0	0	0	3.56	0	3.47075	0	3.74587	4.07582	0	0	0	0	0	3.75347
hsa-miR-3606-3p	0	0	0	0	0	0	0	0	0	0	0	0	0	0	0	0	0	0	0	0	0	3.50761	0	0	0	0	3.29282	0
hsa-miR-3606-5p	0	0	0	0	0	3.20843	0	0	0	0	0	0	0	0	0	0	0	0	3.65177	0	0	0	0	0	0	0	0	0
hsa-miR-3607-3p	-0.347522	0.597938	0.244512	0.519428	0.641305	0.373654	-0.119623	-5.37874	1.95469	1.29585	1.3188	-2.16586	1.10378	-1.10193	-5.37874	-1.56332	1.00584	-0.178264	-0.241928	0.119623	-2.22261	-0.542324	0.561134	1.48781	-1.50549	-5.37874	2.0102	-0.678794
hsa-miR-3607-5p	0	0	3.73526	2.97361	3.0251	0	0	0	5.22455	4.38114	4.41692	0	4.47035	0	0	0	3.98234	0	4.7403	3.40993	0	0	2.95676	0	0	0	5.4381	0
hsa-miR-3609	0	0	0	0	0	0	0	0	0	0	0	0	0	0	0	0	3.14212	0	0	3.94618	0	0	3.7527	0	0	0	0	0
hsa-miR-361-3p	0.455188	0.273677	-0.851794	0.308441	0.162304	1.67502	0.00563285	1.55735	-0.00563285	-0.489079	-0.84899	-0.439837	0.580921	1.24228	-0.791826	0.264856	-0.185816	-0.0653147	-0.496603	0.0283014	1.62784	-0.147334	-0.0336668	0.219431	-4.01885	-4.01885	-0.284259	2.12432
hsa-miR-361-5p	0.0270183	1.49156	1.06259	1.21717	1.83811	0.810911	0.616325	-4.60051	0.590886	0.216111	-0.129173	-0.0270183	-0.392271	-1.45625	-4.60051	-1.48921	0.898801	-0.947391	-0.642225	1.20359	-1.10985	-1.21624	-0.438726	0.339687	-1.59117	-4.60051	1.19182	0.214827
hsa-miR-3610	-3.36964	-3.36964	-3.36964	-0.548	-0.7138	-0.0312113	-0.175532	1.31811	0.426645	-0.423002	0.190418	0.00924709	0.437791	0.433681	-0.25134	0.194978	0.190439	-3.36964	1.04636	1.88548	1.36401	0.461761	0.141016	-0.00924709	-3.36964	-3.36964	-3.36964	1.50985
hsa-miR-3612	0	0	0	0	0	0	0	0	0	0	0	0	0	0	0	0	0	0	0	0	3.22023	0	0	0	0	0	0	0
hsa-miR-3613-3p	0	3.37463	0	0	0	0	0	0	0	0	0	0	0	0	0	0	0	0	0	0	0	0	0	0	0	0	0	0
hsa-miR-3614-5p	0.227114	-0.0399343	-0.578456	-0.268403	0.450048	1.25383	-0.331622	1.69417	0.0210739	-0.0210739	-0.612192	-0.834173	0.187358	1.1016	-0.636403	0.41694	-0.228742	-0.5912	-4.01633	-4.01633	1.56089	1.17883	-1.19484	0.382257	-4.01633	0.525515	0.600552	2.14434
hsa-miR-3615	0	0	0	0	0	0	0	0	0	0	0	0	0	0	0	0	0	0	0	0	0	0	0	0	0	0	0	3.56053
hsa-miR-3616-3p	-3.21349	-3.21349	-0.0476804	0.681583	1.66449	-3.21349	0.0919353	0.302891	0.0476804	0.0847494	2.02034	-0.478718	-0.335082	0.493446	-3.21349	-3.21349	-3.21349	-3.21349	1.65583	0.0843198	0.966339	2.13581	-3.21349	-3.21349	-3.21349	-3.21349	0.334677	1.84416
hsa-miR-3616-5p	3.60892	0	0	0	0	0	0	0	0	0	0	0	0	0	0	0	0	0	0	0	0	0	0	0	0	0	0	0
hsa-miR-3617-3p	3.6008	0	0	0	0	0	0	0	0	0	0	0	0	0	0	0	0	0	0	0	0	0	0	0	0	0	0	0
hsa-miR-3617-5p	0	3.51772	0	0	0	0	0	0	0	0	0	0	0	0	0	0	0	0	0	0	0	0	0	0	0	0	0	0
hsa-miR-3619-3p	-0.177723	-3.51328	-0.530952	-1.08254	-0.158925	-3.51328	-0.976867	0.850156	0.129913	-0.65409	0.313916	-3.51328	0.674471	0.289947	0.242139	-0.0960402	0.721836	-0.402705	0.477077	-3.51328	2.06131	1.58543	0.565294	0.0960402	-3.51328	-3.51328	0.615717	2.39169
hsa-miR-3619-5p	3.70749	0	2.07639	2.47531	0	0	2.74283	0	3.2488	2.75179	2.83204	0	2.83621	3.74001	0	0	3.64173	0	0	0	4.3808	0	0	0	0	0	3.22571	4.18817
hsa-miR-362-3p	0	0	0	0	0	0	0	0	0	0	0	0	0	0	0	0	0	0	0	3.39836	0	0	0	0	0	0	0	3.32618
hsa-miR-362-5p	3.56656	3.83681	0	2.39809	3.51587	0	0	0	0	0	0	0	0	0	0	0	0	0	4.37144	3.86171	0	3.90143	3.49448	4.04314	0	0	3.4245	4.35205
hsa-miR-3620-3p	-0.0243458	-3.66112	-0.768559	-0.901648	-0.692185	0.785882	-0.377589	-3.66112	0.792892	-0.00164141	0.477271	-3.66112	0.659105	0.615624	-3.66112	0.141993	0.445799	-3.66112	0.0947321	0.0138997	-3.66112	0.241586	0.00164141	1.28786	-3.66112	-3.66112	0.371659	1.21754
hsa-miR-3620-5p	-0.711752	-0.466697	-0.153442	0.236336	0.280311	-0.738874	0.140962	1.76353	0.0737762	-0.459916	0.122231	-0.44157	0.0754471	0.312478	0.267393	-0.693414	-0.22599	-1.31306	0.282232	0.466009	2.12314	0.511508	-0.513804	-1.14361	-1.42831	-0.857635	-0.0737762	0.825701
hsa-miR-3621	-0.776429	-0.46523	0.201836	0.163194	0.0946839	0.0438963	0.119767	0.96671	0.266492	-0.511157	0.198544	0.0674969	0.320183	0.536339	-0.840958	-1.29062	-0.948004	-1.35826	-0.34289	-0.0438963	1.47988	0.0754108	-0.892856	-1.54559	-2.05622	-1.49153	-0.279649	0.315787
hsa-miR-3622a-3p	0	0	0	0	0	0	0	0	0	0	0	0	0	0	0	0	0	0	0	3.31251	0	0	0	0	0	0	0	0
hsa-miR-3622a-5p	-0.298333	-0.0323085	0.0996575	0.421667	0.331163	-0.258364	1.01822	1.33441	-0.022026	-0.0582781	0.545942	-0.364042	0.424703	0.888664	-0.0844069	-0.189133	0.500096	-3.70735	1.62212	-0.213774	1.51765	1.31284	0.022026	-3.70735	-3.70735	-3.70735	-3.70735	0.916217
hsa-miR-3622b-3p	0	0	0	0	0	0	0	0	0	3.51928	0	0	0	0	0	0	0	0	0	0	0	0	0	0	0	0	0	0
hsa-miR-3622b-5p	-1.43742	-1.43742	-1.43742	-1.43742	1.64589	-1.43742	2.68814	-1.43742	2.8482	2.81368	3.24583	1.71747	2.68262	3.27943	1.43742	2.45603	3.54988	-1.43742	-1.43742	-1.43742	3.98152	3.14309	-1.43742	-1.43742	-1.43742	-1.43742	-1.43742	2.31553
hsa-miR-363-3p	-0.532907	-0.894844	1.12434	0.702343	2.26946	0.78618	1.13068	-1.37083	0.0962542	-2.04874	-1.70889	0.584085	-0.58876	-5.3613	-5.3613	-1.74804	1.22442	-0.0962542	1.36439	0.724751	-1.78847	-1.54314	1.57264	0.925137	-1.37221	-5.3613	2.00176	0.470264
hsa-miR-363-5p	0	0	0	0	0	0	0	0	0	0	0	0	0	0	0	0	0	0	0	0	0	3.2802	0	0	0	0	0	0
hsa-miR-3646	3.72266	0	0	0	0	2.66063	2.93589	0	0	0	0	0	0	0	0	3.0909	0	0	3.92926	0	0	4.07255	2.92382	0	0	0	0	4.69929
hsa-miR-3648	-0.448615	-0.373753	-0.0089452	0.575651	0.63016	-0.316381	0.545475	0.606458	0.391099	0.322201	0.56131	-0.287779	-0.0198444	0.750074	-1.80462	-1.68199	-0.641897	-1.08511	0.0089452	0.0387072	0.757768	0.347932	-0.337558	-1.00556	-0.630911	-0.235283	0.46431	0.0520262
hsa-miR-3649	0	0	0	0	0	0	0	0	0	0	3.60881	0	0	0	0	0	0	0	0	0	3.19735	4.45923	0	0	0	0	0	3.27096
hsa-miR-3650	4.26161	0	0	0	0	0	0	0	0	0	0	0	0	0	0	0	0	0	0	0	0	0	0	0	0	0	0	3.88891
hsa-miR-3651	2.0923	-1.35505	-1.35505	1.35505	2.2194	-1.35505	-1.35505	-1.35505	1.61482	2.47485	-1.35505	-1.35505	-1.35505	-1.35505	-1.35505	3.07812	3.82968	-1.35505	2.42857	-1.35505	1.91704	2.03675	3.23565	2.14178	-1.35505	-1.35505	2.2474	2.2565
hsa-miR-3652	-0.683884	-0.0384478	-0.796913	-0.345921	-0.278268	-1.32688	0.0384478	2.8575	-0.133143	0.259605	0.452998	-0.71943	-0.203983	0.661403	1.43516	0.610191	0.558439	-0.64276	-0.465374	0.493147	3.67187	0.976152	0.126317	-0.680676	-0.869976	-0.307879	0.675783	1.16482
hsa-miR-3653	0.988142	0.665264	-0.0162755	0.468215	1.59784	-0.351521	0.110692	-4.25055	1.71286	0.223159	1.01738	0.443493	0.126038	-4.25055	-4.25055	-0.986506	0.0762775	-4.25055	1.36434	-0.416304	-0.569612	-4.25055	-0.416098	0.0162755	-0.0297982	-4.25055	1.37949	-0.858703
hsa-miR-3654	0	0	2.4076	0	0	0	2.43333	0	2.39766	0	2.48793	0	0	0	0	0	3.92345	0	3.53218	0	0	0	0	0	0	0	0	3.33226
hsa-miR-3655	0	0	0	0	0	0	0	0	0	0	0	0	0	0	0	0	0	0	0	0	0	0	0	0	0	0	0	3.66073
hsa-miR-3656	-1.3519	-0.884802	0.0321497	0.0447715	-0.198031	-0.472634	0.412041	2.03308	0.123932	0.220764	0.445543	0.0575102	0.265974	0.704635	0.0844891	-0.334946	-0.190436	-0.720199	-0.179351	0.0624163	1.66573	-0.593418	-0.631303	-0.759512	-1.20523	-1.0529	-0.0321497	0.877058
hsa-miR-3657	0	0	0	0	0	0	0	0	2.43495	0	0	0	0	0	0	0	0	0	0	0	0	0	0	0	0	0	0	0
hsa-miR-365a-5p	-1.22242	-0.0418477	-0.286477	0.378279	0.730278	-4.62861	0.57785	1.83337	-0.189342	-0.947823	1.33628	-1.24465	0.115644	1.88887	-0.511197	-0.754679	0.225045	-1.07233	1.26682	0.275715	2.28535	3.65023	-0.308806	-4.62861	-0.565405	-0.178305	0.0418477	2.33598
hsa-miR-365b-5p	-3.57084	-0.147978	-0.479105	-1.18264	-3.57084	0.0860674	-0.339808	1.42042	0.415817	0.719773	0.405079	-0.550992	0.522127	-0.118165	0.0548624	0.0387003	-0.0197983	-0.264681	-3.57084	0.0197983	2.82539	0.705635	0.126219	-3.57084	-3.57084	-3.57084	0.298391	1.2447
hsa-miR-3660	0	0	0	0	0	0	0	3.86533	0	0	5.38515	0	2.68307	3.95155	0	0	3.11222	0	0	0	0	0	0	0	0	0	0	3.44726
hsa-miR-3661	0	0	0	0	0	0	0	0	0	0	0	0	0	0	0	0	3.22191	0	0	0	0	0	0	0	0	0	0	0
hsa-miR-3663-3p	-0.614889	-0.456383	-0.662767	0.128184	0.64613	0.279572	0.679838	0.730415	0.228199	-0.521698	-0.211726	-0.914678	-0.0776506	0.0776506	-2.18792	-0.457787	-0.119287	-0.927967	2.91714	0.155637	0.528514	0.238854	0.568359	-0.173481	-1.58396	-0.681007	0.154014	1.92176
hsa-miR-3663-5p	3.52299	0	0	0	0	0	2.40872	3.88863	0	2.70089	2.9536	0	0	3.41295	0	0	3.24477	0	3.51851	0	4.69364	4.74247	0	0	0	0	3.3941	0
hsa-miR-3664-3p	0	4.13395	0	0	0	0	0	0	0	0	0	0	0	0	0	0	0	0	0	0	0	0	0	0	0	0	0	0
hsa-miR-3665	-0.476747	-0.216807	0.624944	0.715934	0.386822	0.247302	0.325895	1.7379	-0.533595	-0.0957649	0.0403092	0.241365	0.53248	0.233684	-0.601407	-0.0471988	-0.0679915	-1.13202	-0.0403092	0.39333	1.37893	-0.373922	-0.120867	-0.884816	-0.816285	-0.867719	0.759326	1.0528
hsa-miR-3666	0	0	0	0	0	0	0	3.01951	0	0	0	0	0	0	0	0	0	0	0	0	0	0	0	0	0	0	0	0
hsa-miR-3667-3p	0	0	0	0	0	0	0	0	0	0	0	0	0	3.89384	0	0	0	0	3.473	0	0	0	0	0	0	0	0	0
hsa-miR-3667-5p	0	3.60256	0	0	0	0	0	0	0	0	0	0	0	0	0	0	0	0	0	3.48893	0	3.33879	0	0	0	0	0	0
hsa-miR-3668	0	3.9179	0	0	0	0	0	0	0	0	0	0	0	0	0	0	0	0	0	0	0	0	0	0	0	0	0	0
hsa-miR-367-5p	0	0	0	0	0	0	0	0	0	0	0	0	0	0	0	0	0	0	0	0	0	3.33955	0	0	0	0	0	0
hsa-miR-3675-3p	0.532632	0.406563	-1.03227	-0.0114184	0.720907	1.60322	-0.0754264	1.57654	-0.0387122	-0.0325159	-0.376925	-1.09387	0.3219	1.18563	-0.585622	0.472005	-0.13286	-0.221776	-0.142061	0.0114184	1.8108	0.85707	-0.445953	0.7779	-4.58486	0.212981	-0.618969	2.485
hsa-miR-3676-3p	0.0597199	-0.478336	0.0175636	-0.394615	0.921268	1.63804	0.555706	1.35582	-0.199554	0.0882314	-0.463868	-1.37001	-0.205743	0.628309	-0.346379	0.125588	-0.382331	-0.486375	-3.87604	-0.269844	1.33307	0.824398	-0.38069	0.695589	-3.87604	-0.0175636	0.766926	1.75676
hsa-miR-3676-5p	-1.01062	-0.233282	-0.691557	-0.12676	0.728468	-1.27769	0.00827533	1.93135	-0.488212	-0.826135	1.84679	-0.357039	0.38228	0.176981	-0.824317	0.106951	0.771195	-0.302736	-0.00827533	1.0007	2.12829	2.30922	-0.0740984	-0.999931	-0.727029	0.240477	1.45505	0.868713
hsa-miR-3677-3p	0	0	0	0	0	0	0	0	0	0	0	0	0	0	0	0	0	0	0	0	0	0	0	0	0	3.38653	0	0
hsa-miR-3677-5p	0	0	0	0	0	0	0	0	0	0	0	0	0	0	0	0	0	0	0	0	0	0	0	3.38412	0	0	3.24773	0
hsa-miR-3678-3p	3.92223	0	2.31151	3.54215	4.58519	0	5.4473	0	3.06645	0	4.07723	2.66704	3.09766	0	0	0	0	0	0	0	0	5.77052	0	0	0	0	0	0
hsa-miR-3678-5p	0	3.40392	2.27308	0	0	0	2.70338	3.23719	0	0	0	2.37998	0	0	0	0	0	0	0	0	0	0	0	0	0	0	0	0
hsa-miR-3679-3p	0.632038	0.71971	-0.530069	-0.162549	0.681275	1.492	-0.207089	1.94469	-0.144364	-0.282064	0.124022	-1.83173	0.247803	0.916027	-0.323378	0.397251	-0.404354	-0.334889	-0.124022	-0.375744	1.87718	1.05987	-0.951673	0.526883	-4.65006	0.620216	-0.372858	2.30474
hsa-miR-3679-5p	-3.55761	-0.113582	-0.704232	0.173607	1.22711	-3.55761	0.763665	1.31615	0.113582	0.191259	1.13018	-0.246925	0.361727	1.87345	-0.533773	-3.55761	0.408508	-3.55761	0.589714	-3.55761	1.84161	2.44471	-0.725226	-3.55761	-3.55761	-3.55761	0.587427	-3.55761
hsa-miR-3680-3p	0	0	0	0	0	0	0	0	0	0	0	0	0	0	0	0	0	0	3.46221	0	0	0	2.79922	0	0	0	0	0
hsa-miR-3681-3p	3.37533	0	0	0	0	0	0	0	0	0	0	0	0	0	0	0	0	0	0	0	0	0	0	0	0	0	0	0
hsa-miR-3681-5p	0	0	0	0	0	0	0	0	0	0	0	0	0	3.60311	0	0	0	0	0	0	0	0	0	0	0	0	0	0
hsa-miR-3682-3p	0	0	2.34796	3.25556	3.26417	0	3.17036	0	4.60569	4.32031	5.36585	0	2.81951	3.23987	0	0	3.98547	0	3.77401	0	0	5.90623	3.22993	0	0	0	0	0
hsa-miR-3687	-0.631743	0.776359	-4.3334	-0.712823	-0.156878	-4.3334	0.175293	-0.997479	1.3698	1.58647	0.178193	-1.60083	1.80149	-4.3334	0.335455	2.63281	3.78822	-4.3334	0.156878	-0.729269	2.04672	-0.647	3.44308	-4.3334	-1.03934	-4.3334	0.656397	1.33615
hsa-miR-3688-3p	0	0	0	0	2.72647	0	0	0	0	0	0	0	0	0	0	0	0	0	0	0	0	0	0	0	0	0	0	0
hsa-miR-3689a-3p	0	0	0	0	0	0	0	3.59937	0	0	0	0	0	0	0	0	0	0	3.54603	0	0	3.40357	0	0	0	0	0	0
hsa-miR-3689d	4.07607	0	2.63006	2.70303	3.70758	0	2.54582	3.70603	0	0	3.27067	0	0	0	0	0	0	0	0	0	3.88693	4.85737	0	0	0	0	0	0
hsa-miR-3689f	0	0	0	0	0	0	0	0	0	0	2.70521	0	0	0	0	0	0	0	0	0	0	0	0	0	0	0	0	0
hsa-miR-369-3p	0	0	0	0	0	0	0	0	0	0	0	0	0	0	0	0	0	0	0	3.513	0	0	0	0	0	0	0	0
hsa-miR-369-5p	0	0	0	0	0	0	0	0	0	0	0	0	0	0	0	0	0	0	0	4.04041	0	3.31192	0	3.59113	0	0	0	3.70784
hsa-miR-3691-5p	0	0	0	0	2.67591	0	0	0	0	0	0	0	0	0	0	0	0	0	0	0	3.21177	0	0	0	0	0	0	0
hsa-miR-3692-5p	0	0	0	0	2.92625	0	0	0	0	0	0	0	0	0	0	0	0	0	0	0	0	4.07996	0	0	0	0	0	0
hsa-miR-370	-0.264348	-0.646711	-1.3481	-0.218499	0.552179	-0.487094	0.840126	0.0602663	0.223989	0.113823	0.809543	-0.468205	0.257534	1.65458	-1.00174	0.515917	0.878026	-0.553922	-0.0602663	-0.533687	1.39764	2.06174	-0.837181	0.647913	-0.926323	-0.261451	-4.32314	1.62343
hsa-miR-3713	0	0	0	0	0	0	0	0	0	0	0	0	0	0	0	0	0	0	0	0	0	3.42002	0	0	0	0	0	3.65972
hsa-miR-3714	3.46672	0	0	0	3.02317	2.88095	3.32356	0	3.72895	3.06317	4.67954	0	3.1504	0	0	0	0	0	0	0	0	5.27552	0	3.75498	0	0	0	4.40817
hsa-miR-371a-3p	0	0	0	0	0	0	0	0	0	0	0	0	0	0	0	0	0	0	4.20732	0	0	0	0	3.95492	0	0	0	0
hsa-miR-371a-5p	0.291242	-1.07078	-0.795985	-0.604682	-0.671917	0.79044	-0.536923	0.924061	-0.0973148	-0.309116	0.177212	-0.616702	0.0206437	-0.343628	0.147988	0.251268	-0.0206437	-1.06566	0.502067	0.564299	2.10858	0.471914	-0.0610488	0.462774	-1.45801	-1.05015	0.553181	2.35843
hsa-miR-371b-3p	0.851189	0.251945	-0.959355	0.0224152	0.16637	1.47568	-0.0702863	1.49977	0.172211	-0.0224152	-0.270288	-0.0551491	-0.0648177	1.4939	-0.483543	0.630382	-0.180133	-0.227128	-3.27215	-3.27215	1.03235	0.314282	-3.27215	0.913006	-3.27215	-0.0587771	0.26736	2.18886
hsa-miR-371b-5p	-0.778616	-0.198004	0.167181	-0.0114709	0.130754	1.17847	0.142771	1.01569	0.353282	0.0435445	0.309009	0.441082	0.145864	-0.0537022	-0.194961	0.856257	-0.0881298	-1.50305	-0.63483	-0.241833	2.54239	0.0114709	-0.149876	-0.854934	-1.26195	-4.8198	-0.316515	1.73355
hsa-miR-373-3p	0	0	0	0	0	0	0	0	0	0	0	0	0	0	0	0	0	0	0	0	3.73785	0	0	0	0	3.37554	0	0
hsa-miR-373-5p	0.914904	-0.0289388	-0.136861	-0.409544	0.714128	1.53329	0.0164225	1.41777	-0.0164225	-4.30548	-0.36401	0.257669	0.0258107	-4.30548	-0.776628	-0.62672	-0.27138	-1.09896	1.87927	0.656374	1.60061	-0.890327	0.475264	0.427746	-4.30548	-1.09688	0.678428	2.97442
hsa-miR-374a-5p	0	0	0	2.55796	4.71264	0	3.32676	0	0	0	0	0	0	0	0	0	3.43729	0	0	3.45247	0	0	2.82676	0	0	0	0	0
hsa-miR-374b-3p	0	0	0	0	2.85207	0	0	0	0	0	0	0	0	0	0	0	0	0	4.38176	0	0	0	0	0	0	0	0	0
hsa-miR-374b-5p	0.440756	0.96431	0.524181	1.04897	2.69177	0.592076	0.483708	-3.67777	0.707325	0.126658	-3.67777	-3.67777	-0.136732	-3.67777	-3.67777	-3.67777	0.678015	-3.67777	-3.67777	0.232607	-0.470405	-3.67777	0.407723	0.456661	-3.67777	-3.67777	0.514305	-0.126658
hsa-miR-374c-5p	0.765215	1.11847	0.836847	1.33698	2.97757	0.919172	0.76638	-0.452177	0.840484	0.0812586	-1.1773	-0.624294	0.17833	-4.33597	-4.33597	-4.33597	0.763891	-4.33597	0.16469	-0.220272	-4.33597	-0.350112	0.75824	-0.977461	-4.33597	-4.33597	0.7558	-0.0812586
hsa-miR-375	-1.1679	-1.22519	0.806047	-0.30941	1.86655	0.409284	0.0668517	-1.08011	1.29932	0.187392	0.731967	-1.05146	0.990195	-1.19496	-6.28766	-1.85924	1.57017	-2.51356	3.0514	0.252834	-1.02702	0.817024	1.13164	-0.57505	-0.339869	-0.642857	2.51154	-0.0668517
hsa-miR-376a-2-5p	0	0	0	0	0	0	0	3.16976	0	0	0	0	0	0	0	0	0	0	0	0	0	0	0	0	0	0	0	0
hsa-miR-376a-3p	0	3.84562	2.06954	3.50562	4.67575	0	0	0	0	0	0	0	0	0	0	0	0	0	0	4.26771	0	0	0	3.48992	0	0	3.62578	0
hsa-miR-376a-5p	3.33501	0	0	0	0	0	0	0	0	0	0	0	0	0	0	0	0	0	0	0	0	0	0	0	0	0	0	0
hsa-miR-376b-3p	0	0	0	0	0	0	0	0	0	0	0	0	0	0	0	0	0	0	3.97833	3.58041	0	3.54442	0	0	0	0	0	0
hsa-miR-376b-5p	0	3.52414	0	0	0	0	0	0	0	0	0	0	0	0	0	0	0	0	0	0	0	0	0	0	0	0	3.09899	0
hsa-miR-376c-3p	3.45901	0	0	2.83423	4.22407	2.88582	2.98376	0	3.03091	0	2.59548	0	0	0	0	0	0	0	0	3.71239	0	0	0	0	0	0	3.95786	0
hsa-miR-377-3p	4.16034	0	0	3.62764	4.14855	2.61134	0	0	0	0	0	0	0	0	0	0	0	0	3.57061	3.70772	0	0	0	0	0	0	0	0
hsa-miR-377-5p	0	3.49834	0	0	0	0	0	0	0	0	0	0	0	0	0	0	0	0	0	0	0	0	0	0	0	0	0	0
hsa-miR-378a-3p	-0.057102	0.0596341	1.01467	0.497756	2.2072	0.057102	0.285281	-4.58571	0.374537	0.850592	0.294043	0.359553	-0.2944	-4.58571	-4.58571	-1.20705	0.501473	-4.58571	-0.949003	0.678655	-4.58571	-1.0261	0.830881	-4.58571	-1.55027	-4.58571	1.28861	-0.658066
hsa-miR-378a-5p	3.43659	0	2.42043	2.53779	4.25687	0	0	0	0	0	0	0	0	0	0	0	0	0	0	0	3.72682	0	0	0	0	0	4.08597	0
hsa-miR-378b	-1.2116	-1.2116	2.20012	1.64848	3.89142	-1.2116	1.56093	-1.2116	1.2116	2.03811	1.52132	1.41392	1.38779	-1.2116	-1.2116	-1.2116	-1.2116	-1.2116	2.34807	-1.2116	2.40357	-1.2116	1.80446	-1.2116	1.82978	-1.2116	1.88942	-1.2116
hsa-miR-378c	-0.0879977	1.05415	1.67683	1.34813	2.99195	-0.569969	0.420154	-3.45216	-0.185348	0.61703	0.0879977	0.334308	-0.100715	-3.45216	-3.45216	-3.45216	0.891072	-3.45216	1.02248	0.675662	0.104411	-3.45216	0.725483	-3.45216	-0.218006	-3.45216	1.62518	-3.45216
hsa-miR-378d	0.402579	0.308854	1.23895	0.978158	2.69728	-0.24532	-0.000147366	-3.64009	-0.0541611	0.853543	0.000147366	0.56853	0.111526	-3.64009	-3.64009	-3.64009	0.178703	-3.64009	-3.64009	0.514743	-3.64009	-3.64009	1.21845	-3.64009	-3.64009	-3.64009	1.83288	0.0196279
hsa-miR-378e	1.87908	-1.41272	3.14589	2.9091	4.57974	1.98161	1.94347	-1.41272	2.02665	2.67262	1.96135	2.52618	1.41272	-1.41272	-1.41272	-1.41272	2.06687	-1.41272	-1.41272	-1.41272	-1.41272	-1.41272	2.81105	-1.41272	-1.41272	-1.41272	3.89588	-1.41272
hsa-miR-378f	0.786367	-3.11294	1.54748	1.35545	2.86258	-0.359177	0.783924	-3.11294	0.0168932	1.04181	0.132902	0.602203	-0.0168932	-3.11294	-3.11294	-3.11294	0.636451	-3.11294	-3.11294	1.16244	0.202599	-3.11294	1.17398	-3.11294	-3.11294	-3.11294	2.03581	-3.11294
hsa-miR-378g	0.21327	0.210257	1.17377	1.29156	2.86116	0.392601	0.252102	-0.184301	0.485197	0.866298	-0.3432	0.477847	-0.200753	-3.58518	-3.58518	-3.58518	-0.0409579	-3.58518	-3.58518	1.06455	-0.408184	0.157191	0.0409579	-3.58518	-3.58518	-3.58518	1.95471	-3.58518
hsa-miR-378h	0	0	0	0	3.4888	0	0	0	0	0	0	0	0	0	0	0	0	0	0	0	0	0	0	0	0	0	0	0
hsa-miR-378i	-3.35513	0.982535	-1.01278	1.17596	2.57363	0.52384	0.144472	-3.35513	0.274243	0.965182	0.669369	0.374591	-0.264751	-3.35513	-3.35513	-3.35513	0.228258	-3.35513	-3.35513	0.856706	-3.35513	0.251487	0.340874	-3.35513	-0.144472	-3.35513	2.05473	-3.35513
hsa-miR-379-5p	0	0	0	0	0	0	0	0	0	0	2.79732	0	0	0	0	0	0	0	3.99654	0	0	0	0	0	0	0	0	0
hsa-miR-380-3p	0	0	0	2.39501	0	0	0	0	0	0	0	0	0	0	0	0	0	0	0	0	0	0	0	0	0	0	0	0
hsa-miR-380-5p	0	0	0	0	0	0	0	0	0	0	0	0	0	0	0	0	0	0	0	0	0	0	0	0	0	0	3.59072	4.00707
hsa-miR-381-5p	0	0	0	0	0	0	0	0	0	0	0	0	0	0	0	0	0	0	0	0	3.6239	0	0	0	0	0	0	0
hsa-miR-382-5p	0	0	0	0	0	0	0	0	0	0	0	0	0	0	0	0	0	0	0	0	3.39282	0	0	0	2.91781	0	0	0
hsa-miR-383	0	0	0	0	0	0	0	0	0	0	0	0	0	0	0	0	0	0	4.44044	0	0	3.25253	0	0	0	0	0	0
hsa-miR-3907	-0.207125	0.749387	-0.365206	-0.0102351	0.390329	0.665017	0.268641	2.24139	0.915654	0.722845	1.00022	-1.19812	1.62362	0.750589	-2.56675	0.0102351	-0.193125	-0.928288	-2.85315	0.0798903	-0.0931399	-0.415227	-0.917523	2.91059	-1.91837	-1.09552	-0.224415	3.53106
hsa-miR-3909	0	0	0	0	0	0	0	0	0	0	0	0	0	0	0	0	2.93798	0	0	0	0	0	0	0	0	0	0	0
hsa-miR-3911	-2.71323	-2.71323	-0.139686	-0.0228005	0.0228005	-0.098921	-2.71323	1.19834	0.511598	1.25534	0.820017	-2.71323	1.26862	0.925823	-2.71323	-2.71323	1.10526	-2.71323	1.98115	1.14955	1.9217	0.884299	-2.71323	-2.71323	-2.71323	-2.71323	1.36594	1.04067
hsa-miR-3913-5p	0	0	0	0	0	0	0	0	0	0	0	0	0	0	0	0	0	0	0	0	0	0	0	0	0	0	3.11009	0
hsa-miR-3914	0	0	0	0	0	0	0	0	0	0	0	0	0	0	0	0	0	0	3.70218	0	0	0	0	0	0	0	0	0
hsa-miR-3915	0	0	0	0	0	0	0	0	0	0	0	0	0	0	0	0	0	0	0	0	0	3.48803	0	0	0	0	0	0
hsa-miR-3916	5.06872	0	0	0	3.2034	0	0	3.30523	2.66849	0	0	0	2.63568	0	0	3.27463	3.85038	0	0	0	4.17069	3.91666	0	0	0	0	0	0
hsa-miR-3917	0.122451	0.798935	-0.0287817	0.430044	0.757496	-0.522192	0.419954	1.88488	0.236318	-0.131528	-0.289891	-0.347641	-0.165488	-0.132166	0.00630939	-0.640511	0.445596	-4.05415	1.56218	-0.00630939	1.84036	1.01628	-0.136754	-0.360826	-0.862102	-4.05415	0.370591	0.646288
hsa-miR-3918	-1.24626	-1.24626	1.24626	1.81586	1.84359	1.82627	3.22858	-1.24626	2.76414	2.36417	4.71764	1.60743	2.64332	3.03015	-1.24626	-1.24626	-1.24626	-1.24626	-1.24626	-1.24626	-1.24626	2.01802	-1.24626	-1.24626	-1.24626	1.95949	-1.24626	2.31427
hsa-miR-3919	0	0	0	0	0	0	0	0	0	0	0	0	0	0	0	0	0	0	0	0	0	0	0	0	0	0	0	4.41078
hsa-miR-3922-5p	0	0	0	0	0	0	0	0	0	2.68385	2.529	0	0	0	0	0	0	0	0	0	0	0	0	0	0	0	0	0
hsa-miR-3923	0	0	0	0	0	0	0	0	0	0	0	0	0	3.2407	0	0	0	0	0	0	0	0	0	0	0	0	0	0
hsa-miR-3924	0	3.68254	0	0	0	0	0	0	0	0	0	0	0	0	0	0	0	0	0	0	0	0	0	0	0	0	0	0
hsa-miR-3925-3p	0	0	0	0	0	0	0	0	0	0	0	0	0	0	0	0	0	0	0	4.10359	0	0	0	0	0	0	0	0
hsa-miR-3925-5p	-3.11889	-3.11889	-3.11889	-0.153481	0.268767	0.780739	0.0989982	1.58155	0.696751	-0.51858	-0.0711816	-3.11889	0.385137	1.34649	-3.11889	-3.11889	-3.11889	0.484258	-3.11889	-3.11889	1.61903	2.14205	0.0711816	1.11295	-3.11889	0.745072	-3.11889	1.6256
hsa-miR-3927-3p	0	0	0	0	0	0	0	0	0	0	0	0	0	0	0	0	0	0	0	3.40287	0	0	0	0	0	0	0	0
hsa-miR-3927-5p	0	0	0	0	0	0	0	0	0	0	0	0	0	0	0	0	0	0	0	0	0	3.38602	0	0	0	0	0	0
hsa-miR-3928	-0.0255306	0.295713	0.645798	0.467305	0.685735	0.820758	-0.156391	1.43753	0.249777	-0.487003	0.374273	1.01203	0.0874105	-0.2783	-0.945544	-1.21865	-1.17318	-2.26203	0.0255306	-0.516768	1.21226	0.413292	-0.587841	-5.07559	-1.13592	-1.1788	-0.382408	0.544949
hsa-miR-3929	0	0	0	0	3.47613	0	0	0	0	0	0	0	0	0	0	0	0	0	0	3.77063	3.56336	3.45052	0	0	0	0	0	0
hsa-miR-3934-3p	0	0	0	0	0	0	0	0	2.34697	0	0	0	0	0	0	0	0	0	0	0	0	0	0	0	0	0	0	0
hsa-miR-3934-5p	-2.96664	0.762113	-0.756646	0.959548	1.35968	-2.96664	0.541869	-2.96664	0.710177	-0.173425	0.296684	-0.624092	0.915855	0.77268	-2.96664	-2.96664	0.888461	-2.96664	0.848421	-2.96664	1.01078	2.54794	-2.96664	-2.96664	-2.96664	-2.96664	0.173425	1.15243
hsa-miR-3935	0	4.06914	0	0	0	3.3046	0	0	3.52829	3.63595	2.90409	0	3.30208	4.11009	0	0	3.25604	0	0	0	0	0	0	0	0	0	3.40503	4.22201
hsa-miR-3936	0	0	0	0	0	0	0	0	0	0	3.40963	0	3.38782	3.04299	3.03831	0	3.23325	0	0	0	3.37947	0	0	0	0	0	0	0
hsa-miR-3937	-1.73655	-1.4627	0.0333072	0.054991	-0.177848	-0.634781	0.196257	1.66066	0.470374	0.116135	0.262285	0.160138	0.478935	0.00163555	-0.151586	-0.831186	0.226155	-1.08219	-0.356237	0.494262	2.12737	-0.342719	-0.449169	-1.69056	-1.15975	-1.58031	-0.00163555	0.282884
hsa-miR-3940-3p	0.562415	0.785036	-0.515348	-0.952812	0.211904	0.671099	-0.42324	-0.559707	0.47213	0.0222801	0.162506	-1.41194	0.262819	-0.233201	-4.18416	0.356262	-0.129014	-0.890026	-4.18416	0.415499	-1.00582	-0.0222801	-0.519702	1.40755	-4.18416	0.427346	0.291446	1.8311
hsa-miR-3940-5p	-0.877021	-0.443743	0.118812	0.255253	0.210031	0.474593	0.169243	1.85512	0.16996	-0.263343	-0.0247474	0.293513	0.24362	0.33514	-0.335284	-0.339583	-0.38641	-0.874809	-0.224275	0.728431	1.8282	-0.245921	-0.654378	-0.0501061	-1.39591	-1.08329	0.0247474	0.98852
hsa-miR-3941	0	0	0	0	0	0	0	0	0	0	0	0	0	0	0	0	0	0	0	0	0	0	0	0	0	0	0	3.39415
hsa-miR-3942-3p	0	4.63027	0	0	0	2.84253	0	0	0	0	0	0	0	0	0	0	3.13468	0	3.59707	0	0	0	0	0	0	0	0	0
hsa-miR-3943	2.256	2.59607	1.07145	1.86642	2.19403	2.86778	-1.07145	3.01917	2.10813	-1.07145	-1.07145	-1.07145	2.23136	2.25624	-1.07145	-1.07145	-1.07145	-1.07145	-1.07145	-1.07145	2.78593	2.63344	1.71047	-1.07145	-1.07145	-1.07145	-1.07145	4.03651
hsa-miR-3944-3p	0	3.48511	0	0	0	2.74905	2.58258	4.56831	2.68965	0	3.26786	0	3.33355	0	0	0	3.21114	3.12993	0	0	3.3061	3.29743	0	0	0	0	0	0
hsa-miR-3944-5p	0	3.3953	0	0	0	0	0	0	2.87066	2.90507	3.4599	0	3.13945	3.67267	0	0	2.97876	0	0	0	0	0	0	0	0	0	0	4.04538
hsa-miR-3945	0	3.87471	0	0	2.99837	0	0	0	0	0	0	0	2.5251	0	0	0	0	0	0	0	0	4.71476	0	0	0	0	0	0
hsa-miR-3960	-0.737718	-0.342993	0.0916304	0.215374	-0.116812	0.301166	0.0230437	0.754177	0.035421	-0.0230437	0.116199	0.118723	0.227644	-0.48237	-1.66812	-0.551667	0.104418	-1.51294	-0.198954	0.547865	0.210886	-1.64157	-0.389227	-1.25031	-0.628881	-1.70219	0.4519	0.328493
hsa-miR-3972	0	0	2.09667	0	0	2.83937	0	0	2.85759	0	0	0	2.99483	3.14456	0	0	0	0	0	0	0	0	0	3.71715	0	0	3.51	3.39766
hsa-miR-3973	0	0	0	0	0	0	0	0	0	0	0	0	0	0	0	0	0	0	0	0	0	0	0	0	0	0	0	4.15033
hsa-miR-3975	0	0	0	0	0	0	0	0	0	0	0	0	0	0	0	0	0	0	3.91494	0	0	0	0	0	0	0	0	0
hsa-miR-3976	6.41524	0	0	2.58152	2.91593	0	0	0	0	0	0	0	0	0	0	0	0	0	0	0	0	0	0	0	0	0	0	0
hsa-miR-409-3p	0	0	0	0	0	0	0	0	3.15746	0	0	0	2.84196	3.37184	0	3.63706	0	0	0	3.7822	3.28507	0	0	4.28813	0	0	3.42357	4.72377
hsa-miR-409-5p	0	0	0	0	0	0	0	0	0	0	0	0	0	0	0	0	0	0	3.49374	0	0	0	0	0	0	0	0	0
hsa-miR-410	0	3.38709	0	0	0	0	0	0	0	0	0	0	0	0	0	0	0	0	0	3.6582	0	0	0	0	0	0	0	0
hsa-miR-411-5p	0	0	0	0	0	0	0	0	0	0	0	0	0	0	0	0	0	0	0	0	0	0	0	0	0	0	3.61191	0
hsa-miR-412	0	0	0	0	0	0	0	0	0	0	2.63984	0	0	0	0	0	5.06598	0	0	0	0	0	0	0	0	0	0	0
hsa-miR-421	0	0	0	0	0	0	0	0	0	0	0	2.3887	0	0	0	0	3.88507	0	0	4.04055	0	0	0	0	0	0	0	0
hsa-miR-422a	-0.333721	0.338258	0.0448129	0.338207	1.39043	-0.986704	-0.328683	1.07247	0.462873	0.871558	0.209117	-0.755783	0.634318	0.0817755	-1.95546	-0.266821	-0.0448129	-1.61358	-1.03107	-0.306105	0.690357	0.780542	-0.0655461	-1.84599	-1.91094	-1.36501	1.03822	1.33365
hsa-miR-423-3p	1.17364	1.12077	0.0872016	0.558697	1.84788	-0.723554	0.0813136	-0.386572	0.379862	-0.322346	-0.574875	-1.18862	-0.426199	-3.90296	-3.90296	-0.211013	2.02708	-3.90296	1.06169	1.35174	-3.90296	-0.373112	0.351071	0.862287	-0.347728	-0.0813136	2.30423	0.562584
hsa-miR-423-5p	0.135085	0.314374	-0.455246	0.905961	0.292571	-0.6958	0.764095	0.683298	0.213724	0.20194	0.0333088	-0.298751	-0.113664	-0.220701	-0.503002	-1.20435	-0.292622	-4.25402	0.799314	0.195752	0.818336	0.0351518	-1.01821	-0.568843	-0.754364	-4.25402	0.0936483	-0.0333088
hsa-miR-424-3p	0	0	0	0	0	0	0	0	0	0	0	0	0	0	0	0	3.14832	0	0	3.2874	0	3.77034	0	0	0	0	0	0
hsa-miR-424-5p	-2.98298	1.53572	-0.21933	1.12967	3.09927	-0.10266	0.941087	0.417902	-0.0774618	-0.348912	-0.296191	-2.98298	0.180723	-2.98298	-2.98298	-2.98298	1.9959	-2.98298	1.43186	1.96379	1.20633	-2.98298	0.745282	-2.98298	0.0774618	-2.98298	1.79845	1.13643
hsa-miR-425-3p	0	3.55492	2.19122	4.0647	4.77567	0	0	3.45979	2.39681	0	0	0	0	0	0	0	3.53967	0	4.50421	3.80889	3.67681	0	2.80299	0	0	0	3.51885	3.55691
hsa-miR-425-5p	-2.77467	0.577279	0.00232779	0.383622	1.52512	-2.77467	-0.0848401	-2.77467	0.824024	-2.77467	-2.77467	-2.77467	-0.00232779	-2.77467	-2.77467	0.62621	2.25602	-0.040416	0.969434	3.26485	-2.77467	-2.77467	2.42308	0.636297	-2.77467	0.54199	3.72818	2.59737
hsa-miR-4253	-3.14779	-3.14779	-0.158203	0.439738	-0.32582	-3.14779	0.766128	2.04247	1.06211	1.3531	1.11557	-0.117838	1.11698	2.33313	1.8441	0.117838	0.331632	-0.11843	-3.14779	-3.14779	2.96651	-3.14779	0.307466	-3.14779	-3.14779	-3.14779	-3.14779	1.79358
hsa-miR-4254	-0.282754	0.340411	0.35936	0.670776	1.10012	0.860414	0.448085	0.529356	1.0064	0.184149	0.207122	-0.372563	0.7403	-0.333618	-2.59823	-1.33111	-0.649835	-0.815495	-5.09986	0.535922	-0.969641	-0.28122	-0.381615	-0.184149	-1.44765	-0.302624	1.07338	0.865433
hsa-miR-4255	0	0	0	0	0	0	0	0	0	2.74046	0	0	0	0	0	0	0	0	0	0	0	0	0	0	0	0	0	0
hsa-miR-4256	0	0	0	0	0	0	0	0	0	0	0	0	0	0	0	0	2.97955	0	0	0	0	0	0	0	0	0	0	0
hsa-miR-4257	0.0690519	-0.0386085	0.161904	0.44968	0.458028	-0.427276	0.567145	0.794641	0.162061	-0.248891	1.18373	-0.319066	-0.517273	-0.12492	-0.337574	-0.773319	-0.0392452	-1.83953	1.37759	-0.626159	1.41354	0.978867	0.0386085	-0.909806	-1.06719	-1.41335	0.192057	1.45489
hsa-miR-4258	0.325823	-0.474308	0.0796513	0.186599	0.0945372	1.50797	0.319427	-5.30925	0.485948	-0.0796513	0.674182	-0.0965372	0.653303	-1.05523	-5.30925	-5.30925	-0.233522	-5.30925	1.66877	0.147732	-1.81738	-1.19007	0.108012	-0.333138	-1.04388	-5.30925	0.764088	1.04672
hsa-miR-4259	0.0934321	-3.20418	-3.20418	-0.249803	0.502238	0.132439	0.816954	0.938658	0.717399	0.594786	0.99048	-3.20418	0.530269	1.49626	-0.18208	-3.20418	0.506989	-3.20418	-3.20418	-3.20418	1.53922	-3.20418	-0.0934321	-3.20418	-3.20418	-3.20418	0.369576	1.46916
hsa-miR-4260	-3.75316	-3.75316	-1.31671	-0.494555	-0.0444883	0.421095	-0.793914	0.0444883	0.555928	0.839449	0.269668	-3.75316	0.452452	0.589093	-1.37775	0.17176	0.30453	-3.75316	-3.75316	-3.75316	1.39461	0.670566	-3.75316	0.273813	-3.75316	-3.75316	0.743131	1.39356
hsa-miR-4261	0.102526	0.770497	-1.49846	-0.323595	0.628919	0.352026	-0.406495	0.935035	0.429448	0.647736	0.391423	-4.02517	0.403455	0.62411	-4.02517	-0.588985	-0.165607	-0.305993	-4.02517	0.0986209	0.952884	0.397132	-0.203718	-0.350655	-4.02517	-0.0986209	-0.116352	0.408103
hsa-miR-4264	0	0	0	0	0	0	0	0	0	0	0	0	0	0	0	0	0	0	0	3.44831	0	0	0	0	0	0	0	0
hsa-miR-4265	0	0	0	0	0	3.00627	3.30128	0	2.87374	0	2.67152	0	2.64797	0	0	0	0	0	0	0	0	0	0	0	0	0	0	0
hsa-miR-4266	0	0	0	0	0	0	0	0	0	0	0	0	0	0	0	0	0	0	3.6762	0	0	0	0	0	0	0	0	0
hsa-miR-4267	-3.08171	0.946961	-3.08171	-0.261395	0.186756	0.795093	0.265623	-3.08171	0.995614	1.3015	0.915882	0.168534	0.790409	0.112589	-3.08171	0.45911	-3.08171	-0.112589	-3.08171	-3.08171	0.313072	-3.08171	-3.08171	-3.08171	-3.08171	-3.08171	0.605129	1.13565
hsa-miR-4269	0.300696	0.674432	-0.028213	0.702793	0.665935	0.723184	0.360918	-0.463993	0.622702	0.301202	0.028213	-0.625506	-0.0639655	-0.231046	-4.03484	-0.592081	-4.03484	-0.961137	0.411865	0.335146	-0.422878	0.525927	-0.287397	-0.136561	-4.03484	-4.03484	0.419109	1.30643
hsa-miR-4270	-1.32102	-0.38265	-0.302055	0.234537	0.876761	-0.456414	0.358025	1.33523	0.911794	0.278556	0.642515	-0.16232	0.642097	0.842654	-0.630392	-1.02696	-0.672074	-1.41303	0.773644	0.0908066	1.63372	-0.0908066	-0.734672	0.694381	-1.31056	-1.33958	-0.610512	0.485379
hsa-miR-4271	-0.819553	0.0550902	-0.237339	0.138182	0.668409	-5.83122	-0.120708	2.27672	0.517123	-0.153987	-0.0351228	-1.30761	-0.095535	0.638144	1.55872	0.0351228	0.248274	-1.00119	0.394641	-0.386754	2.65623	0.89444	-0.059308	-0.227716	-1.81924	-0.299573	0.57815	0.146458
hsa-miR-4274	0.796343	0.857628	-0.615488	-0.498017	-0.264788	1.76095	-0.708435	1.05568	-0.0181312	-0.968058	-0.0643806	-0.439481	-0.275532	0.0582093	-0.952452	0.21658	0.0181312	-0.930275	0.219812	0.23071	1.54062	0.483954	-0.409598	0.818069	-0.857304	-0.431422	0.211132	1.94499
hsa-miR-4276	0.106926	1.0232	-0.256242	0.323742	0.476564	-3.73991	0.508312	1.30076	-0.0744384	-0.771018	0.226668	-0.637055	-0.0746272	-0.171439	-0.335829	-3.73991	-0.314933	-3.73991	2.20134	0.875022	2.04014	0.0744384	0.54457	-3.73991	-0.658563	-3.73991	1.39161	1.52512
hsa-miR-4279	0.79048	1.99353	0.35225	-0.172575	0.867208	0.172575	-2.5785	-2.5785	-2.5785	-2.5785	-2.5785	-0.316001	-2.5785	-2.5785	-2.5785	0.383114	0.766318	-2.5785	1.4599	1.32523	0.556625	1.66041	1.73534	-2.5785	-2.5785	-2.5785	0.882044	1.12793
hsa-miR-4280	0	0	0	0	0	0	0	0	0	0	0	0	0	0	0	0	0	0	0	3.76159	0	0	0	0	0	0	0	0
hsa-miR-4281	-1.51407	0.0827971	-0.592818	0.237846	0.309637	-2.11755	-0.0102411	2.48842	0.0134109	0.294512	0.251665	-0.859415	-0.136069	0.874349	1.08593	-0.0816849	-0.337401	-0.890744	0.47997	-0.329823	2.41898	0.966512	-0.707314	-1.5048	-1.33432	-0.134128	0.0102411	0.667039
hsa-miR-4283	0	0	0	0	0	0	0	0	0	0	0	0	0	0	0	0	0	0	3.46036	0	0	0	0	0	0	0	0	0
hsa-miR-4284	-0.481394	0.179761	-0.735125	-0.156184	0.805303	0.488313	-0.0686864	-2.68	0.944785	0.0217832	0.47823	-1.85213	-0.0217832	-1.30882	-4.01567	0.882186	-0.17044	-1.00628	-1.09743	2.67164	-2.34177	0.0851212	1.58811	3.86926	-0.229744	0.100014	1.16827	1.03268
hsa-miR-4285	0	0	2.17757	0	3.67322	0	0	3.75124	2.77472	0	0	0	2.43651	0	0	0	0	0	0	0	4.42724	3.85891	0	0	0	0	3.15148	0
hsa-miR-4286	-0.00324494	0.873789	0.0994082	0.41848	1.11162	1.13536	-0.0839311	-0.384399	0.539111	0.047281	0.372097	-1.30217	0.537387	0.377619	-4.30824	-0.58114	-0.0507513	-0.00765572	-3.62251	0.214044	-1.26628	-1.54605	-0.418055	0.00324494	-1.55308	-0.124558	0.776013	0.737392
hsa-miR-4287	0	0	0	0	0	2.70832	2.88079	0	0	0	0	0	2.45679	0	0	0	0	0	0	0	0	0	0	0	0	0	0	0
hsa-miR-4289	-0.0274826	1.18925	0.404342	1.07516	1.75223	0.411713	0.969111	-4.09145	1.24439	0.0274826	-1.15805	-1.05593	0.631553	-4.09145	-4.09145	-4.09145	1.60912	-4.09145	0.374482	2.08413	-4.09145	-4.09145	0.996151	-0.641344	-4.09145	-4.09145	2.03587	-0.38785
hsa-miR-429	-1.20053	-1.20053	1.29906	1.20053	4.1498	2.73933	1.70211	-1.20053	3.2116	-1.20053	-1.20053	2.31738	3.51456	-1.20053	-1.20053	-1.20053	-1.20053	-1.20053	2.96613	4.04307	-1.20053	-1.20053	2.06349	2.25363	-1.20053	-1.20053	4.52348	3.44735
hsa-miR-4291	1.04952	1.28969	0.608772	1.74133	1.97893	1.00774	0.544809	-0.143957	1.17303	0.143957	-0.511675	-0.280127	0.38864	-3.63453	-3.63453	-3.63453	0.320093	-0.833462	-3.63453	-3.63453	-3.63453	-3.63453	1.02583	-3.63453	-3.63453	-3.63453	0.232125	0.714175
hsa-miR-4292	0	0	0	0	0	3.6324	0	0	2.52337	2.91951	3.36539	2.72459	2.82746	3.49216	0	3.31554	0	0	0	0	3.92937	0	0	0	0	0	0	4.04461
hsa-miR-4293	0	4.05274	0	0	0	0	2.71692	0	0	0	0	0	0	0	0	0	0	0	0	0	4.12297	0	0	0	0	3.42715	0	0
hsa-miR-4294	-0.422647	-0.0848127	-0.882338	0.258023	0.419184	-1.25284	0.705304	1.39834	0.144826	-0.0840687	0.921025	-1.41243	0.0225269	2.80533	0.129314	-0.364962	-0.0283625	0.910188	0.746518	-0.108954	1.90062	3.58266	-0.0225269	-1.09706	-1.64141	-1.11819	-0.0267069	0.95353
hsa-miR-4295	0	3.81041	0	0	0	0	0	0	0	0	0	0	0	0	0	0	0	0	0	3.82466	0	0	0	3.78024	0	0	0	3.38412
hsa-miR-4296	0	3.53632	0	0	0	0	0	0	0	2.66353	2.62886	0	0	3.09305	0	0	0	0	3.56948	0	0	0	3.1546	0	0	0	0	0
hsa-miR-4297	0	0	0	0	0	0	0	0	0	0	0	0	0	0	0	0	0	0	0	0	0	3.61887	0	0	0	0	0	0
hsa-miR-4298	-0.747048	1.00384	-0.514267	0.317455	1.11848	-0.238716	0.593483	1.70949	0.419046	0.36697	-0.100965	-0.368874	0.856048	0.270576	-0.406601	-0.524606	0.619999	-1.22859	-0.219934	-0.301813	2.19696	0.92704	0.049585	-4.27093	-1.27691	-0.790825	-0.049585	0.564669
hsa-miR-4299	0.137109	1.10166	-0.501249	0.507077	1.26678	0.56613	0.599665	0.690821	0.33077	-0.251387	2.35345	-1.35003	-0.187506	0.408054	-3.62502	-3.62502	-3.62502	-3.62502	0.229229	-3.62502	0.279203	2.5183	-0.137109	-3.62502	-3.62502	-3.62502	-3.62502	0.529852
hsa-miR-4300	0	0	2.13895	0	0	0	0	0	3.09426	0	3.03043	0	3.50218	3.41209	0	0	3.65969	0	0	0	0	0	0	0	0	0	0	3.60947
hsa-miR-4301	0	3.44427	0	0	0	0	0	0	0	2.61449	0	0	0	0	0	0	0	0	0	0	0	0	0	0	0	0	0	0
hsa-miR-4302	3.52931	0	0	0	0	0	0	0	0	0	0	0	0	0	0	0	0	0	0	0	0	0	0	0	0	0	0	0
hsa-miR-4303	0	0	2.06423	0	0	0	0	0	0	0	2.50649	0	2.67765	0	0	0	0	0	4.90345	0	0	0	0	0	0	0	0	0
hsa-miR-4304	1.11942	1.0639	-0.545935	0.180296	0.100656	1.41736	-2.77303	0.656583	0.0273339	-0.160249	-0.0273339	0.143264	0.505622	0.794664	-2.77303	-2.77303	0.75517	-2.77303	-2.77303	-2.77303	1.51113	0.931851	-2.77303	-2.77303	-2.77303	-2.77303	-2.77303	1.87563
hsa-miR-4306	0.819933	0.879599	-2.89565	-0.18514	0.441314	1.13878	-0.201449	-2.89565	0.574251	-0.335459	0.18514	-0.494112	0.261737	-2.89565	-2.89565	-2.89565	1.73859	-2.89565	0.658773	0.681354	0.530868	-2.89565	1.36305	-2.89565	-2.89565	-2.89565	1.47073	0.660176
hsa-miR-4308	0	0	0	0	0	0	0	0	0	3.26685	4.15186	0	0	0	0	0	0	0	0	0	0	0	0	0	0	0	3.17405	0
hsa-miR-4309	0	0	0	0	0	0	0	0	0	0	0	0	0	0	0	0	0	0	4.26538	0	0	0	0	0	0	0	0	0
hsa-miR-431-3p	3.54395	0	0	0	3.55994	0	0	0	0	0	0	0	0	0	0	0	0	0	0	0	0	4.18781	0	0	0	0	3.8905	3.88603
hsa-miR-431-5p	3.43169	0	0	0	0	0	0	0	0	0	0	0	0	0	0	0	0	0	0	0	0	0	0	0	0	0	0	0
hsa-miR-4311	0	0	0	0	0	0	0	0	0	0	0	0	0	0	0	0	0	0	3.6242	0	0	0	0	0	0	0	0	0
hsa-miR-4313	1.49932	0.547305	-0.0523409	-0.158594	0.340527	3.20638	0.410469	0.250509	-0.106356	-3.5921	-0.491531	0.326259	0.325367	-3.5921	-3.5921	-0.254531	-0.336806	-3.5921	-3.5921	-0.109042	0.732416	-3.5921	0.0523409	0.433741	-3.5921	0.147597	0.826539	0.373623
hsa-miR-4314	0	3.69159	0	0	0	0	0	0	0	0	0	0	0	0	0	0	0	0	0	0	0	0	2.82532	0	0	0	0	3.32605
hsa-miR-4316	4.07187	3.79901	0	3.06277	4.13808	3.3032	2.4317	4.59927	0	0	2.49879	0	3.10976	0	0	0	0	0	0	3.6918	4.04938	0	0	0	0	0	3.37731	3.55897
hsa-miR-4317	0.829208	0.856145	1.37162	1.96374	2.10723	0.548919	0.883942	-4.72184	1.27887	0.79988	-0.0493236	-0.0909822	0.730929	-4.72184	-4.72184	-4.72184	0.0568093	-4.72184	-4.72184	0.174584	-4.72184	-0.853351	0.105052	-1.36328	-1.79695	-4.72184	0.0493236	-4.72184
hsa-miR-4318	0	0	0	0	0	0	0	0	0	0	0	0	0	0	0	0	0	0	0	3.49659	0	0	0	0	0	0	0	0
hsa-miR-4319	-3.71367	0.331734	-0.908571	0.130736	0.552493	0.225581	-0.8596	0.258269	0.0104773	0.0122951	0.359214	-3.71367	0.240643	0.649841	-3.71367	-0.70523	-0.678202	-0.933576	-3.71367	-0.0104773	-0.0393856	0.545086	-0.259358	0.694742	-0.752865	0.611055	-0.0861238	0.911676
hsa-miR-432-3p	0	0	0	0	0	0	0	0	0	0	0	0	0	0	0	0	0	0	0	0	0	0	2.82726	3.61379	0	0	0	0
hsa-miR-432-5p	3.51505	0	0	0	0	0	0	0	0	0	0	0	0	0	0	0	3.008	0	3.55325	3.45143	0	0	0	0	0	0	3.40398	0
hsa-miR-4320	0	0	0	0	0	0	0	0	0	0	0	0	0	0	0	0	0	0	0	0	0	0	0	0	0	0	3.51233	3.70838
hsa-miR-4321	0	0	0	0	0	0	0	0	0	2.76958	0	0	0	0	0	0	0	0	0	0	0	4.52929	0	3.5195	0	0	0	3.56053
hsa-miR-4322	-4.10412	-4.10412	-0.318939	-0.335356	-0.136374	-0.12718	0.274962	2.02624	0.461451	0.483541	0.992749	0.172976	0.384355	0.12718	0.715436	-0.618594	0.688554	-0.548483	-4.10412	-0.494001	2.20334	0.505522	-0.210473	-0.706382	-4.10412	-4.10412	0.397662	0.873001
hsa-miR-4323	-0.0618081	1.11529	-0.585299	0.0325307	0.490421	1.24842	-0.257822	0.885032	0.211952	-0.114681	-0.00325478	-0.887124	0.162082	0.466592	-1.39469	-0.811503	-0.0734719	-0.630629	-3.99867	-0.395845	0.992819	0.482168	-0.326622	0.470545	-3.99867	0.610643	0.00325478	1.67015
hsa-miR-4324	-0.0150066	1.16473	1.22917	1.72961	2.09424	0.0247491	1.1081	-4.35587	1.41111	0.958124	0.418478	0.517062	-0.828285	-2.74905	-8.00955	-3.8894	1.05494	-2.54483	-0.352252	0.0150066	-4.69472	-1.62559	0.365616	0.127023	-2.4813	-3.44337	-0.137149	-1.43589
hsa-miR-4325	0	0	0	2.41304	3.93321	0	0	3.01509	0	0	0	0	0	0	0	0	0	0	0	0	3.67681	0	0	0	0	0	0	3.60947
hsa-miR-4326	0	3.56953	0	2.76169	4.73449	0	0	0	0	0	0	0	0	0	0	0	0	0	0	0	3.22169	3.47468	0	0	0	0	0	0
hsa-miR-4327	-1.04001	-0.448829	-0.375514	0.372313	0.318579	-1.08178	0.211679	1.50164	0.0821874	-0.0821874	0.267787	-0.314131	-0.183708	0.195153	-0.106936	-1.11604	0.78637	-1.24383	0.703328	0.446473	1.88061	0.792189	-0.269484	-0.909603	-1.08692	-1.32261	0.41726	0.725513
hsa-miR-4328	3.09083	3.78146	4.22674	4.68296	4.88535	2.50068	3.98511	-0.115343	3.21601	3.53782	2.5001	2.36232	2.55511	-3.45481	-3.45481	-3.45481	-3.45481	-3.45481	-3.45481	0.115343	-3.45481	-3.45481	-3.45481	-3.45481	-3.45481	-3.45481	0.282255	-3.45481
hsa-miR-4329	2.99262	2.59045	2.84788	3.2487	3.92288	3.36759	3.3612	-1.2253	2.8542	2.86259	3.15259	2.63329	1.2253	-1.2253	-1.2253	-1.2253	-1.2253	-1.2253	-1.2253	-1.2253	-1.2253	-1.2253	-1.2253	-1.2253	-1.2253	-1.2253	1.99085	2.33475
hsa-miR-433	0	3.38801	0	0	0	0	0	0	0	0	0	0	0	0	0	0	3.28277	0	0	0	0	0	0	0	0	0	0	0
hsa-miR-4330	0	0	0	0	0	0	0	0	0	0	0	0	0	0	0	0	0	0	4.0473	0	0	0	0	0	0	0	0	0
hsa-miR-4417	-1.55824	-0.442287	-0.486047	0.0705944	-0.0965743	-2.03692	-0.0803502	1.16854	0.382111	0.193045	-0.0705944	-0.957767	0.630488	-0.434696	0.50407	1.18768	2.36827	-1.83751	0.205389	0.420102	1.95065	-1.03863	1.88697	-1.35715	-1.08047	-1.9878	0.601393	0.962389
hsa-miR-4418	0	0	0	0	0	0	0	0	0	0	3.20699	0	0	3.04315	0	0	0	0	4.07451	3.80467	0	0	0	0	0	0	0	0
hsa-miR-4419a	-3.10287	0.551124	-3.10287	-0.438675	-0.461928	0.554025	0.190361	0.026746	-0.026746	0.672468	0.441901	-3.10287	0.499631	1.05652	-0.0839497	0.352395	1.25917	-3.10287	-3.10287	-3.10287	1.81755	2.00454	0.286033	-3.10287	-3.10287	-3.10287	-3.10287	1.24436
hsa-miR-4419b	-4.14879	0.0624573	-0.808851	0.354614	0.666345	-1.07786	0.247193	0.538958	1.14162	1.45313	0.637167	-0.657797	1.47936	0.235284	-1.54335	0.046158	1.10702	-4.14879	-0.046158	-0.727998	1.46528	1.05224	-0.201367	-4.14879	-0.992593	-4.14879	-4.14879	-0.70609
hsa-miR-4422	4.73483	0	0	0	0	0	0	0	0	0	0	0	0	0	0	0	0	0	0	0	0	0	0	0	0	0	0	0
hsa-miR-4426	0	0	0	0	2.97054	0	0	0	0	0	0	0	0	0	0	0	0	0	3.71171	3.512	3.46018	0	0	0	0	0	0	0
hsa-miR-4427	0	0	0	0	0	0	0	0	0	0	0	0	0	0	0	0	0	0	0	3.79929	0	0	0	0	0	0	0	3.70599
hsa-miR-4428	-3.26054	-3.26054	-3.26054	-0.0258785	-0.130834	-0.302219	0.354477	0.0110707	0.628431	0.877043	1.30595	-0.0110707	0.558197	0.87448	-0.259901	0.563305	0.341769	-0.0819871	1.185	0.764484	1.35444	2.25232	-3.26054	-3.26054	-3.26054	-3.26054	-0.150448	1.33876
hsa-miR-4429	-0.372631	-0.27856	0.169584	0.791903	1.5389	-0.330273	0.603834	-0.442299	1.29032	1.1108	0.71885	0.307199	0.192495	-3.80827	-3.80827	-3.80827	1.12256	-3.80827	0.143513	0.0332911	-0.0089289	-0.427961	0.00883533	-3.80827	-0.567372	-3.80827	0.432485	-0.00883533
hsa-miR-4430	-3.198	-3.198	-3.198	-0.184552	0.556819	1.22191	-0.291336	0.931473	0.6523	0.605679	1.06319	1.26885	1.30311	0.752702	-3.198	0.308089	1.52357	-3.198	-3.198	0.184552	1.27698	1.02433	-0.384908	-3.198	-3.198	-3.198	-3.198	-3.198
hsa-miR-4431	3.56921	0	0	0	0	0	0	0	0	0	0	0	0	0	0	0	0	0	0	0	0	0	0	0	0	0	0	0
hsa-miR-4432	0	0	0	0	0	0	0	0	0	0	0	0	0	0	0	0	0	0	0	3.43726	0	0	0	0	0	0	0	0
hsa-miR-4433-3p	-0.6023	0.0466838	0.170684	0.406058	0.959221	-0.580458	0.652828	1.64	0.628983	-0.0466838	0.211804	-0.282719	0.232185	0.635872	0.59184	-0.986432	-0.548427	-1.70981	0.0601182	-0.359913	1.9061	-0.190252	-0.74863	-0.918714	-2.80393	-1.93044	-0.238155	0.394029
hsa-miR-4433-5p	0.609578	-0.27678	0.266691	0.0886075	0.10519	2.46068	-0.0203678	0.592818	0.193859	-0.154677	0.0203678	0.312467	0.671232	0.424955	-1.13145	-0.35864	-0.175989	-0.796573	-0.434203	-0.543915	0.904966	-0.717006	-0.0917763	0.426855	-4.35634	-0.231793	-0.219846	2.01465
hsa-miR-4434	0	0	0	0	0	0	0	0	0	0	0	0	0	0	0	0	0	0	0	3.65099	0	0	0	0	0	0	0	0
hsa-miR-4435	0.0411572	-3.81946	-0.0169083	0.700168	1.60706	-0.486408	0.640121	1.65961	0.762841	-0.000282857	2.03728	3.04674	1.27977	0.479118	-3.81946	-0.627853	0.401382	0.000282857	-3.81946	-0.107419	0.818137	0.993302	-0.674194	-3.81946	-3.81946	-3.81946	-0.0802652	-0.0236002
hsa-miR-4436a	0	0	0	0	0	0	0	0	3.04361	0	2.65235	0	3.53923	0	0	0	0	0	0	0	0	0	2.96739	0	0	0	0	0
hsa-miR-4436b-3p	0	0	0	0	0	0	2.38468	0	2.89882	3.12307	0	0	3.30982	0	0	3.51987	0	0	3.98378	4.55148	4.35248	3.59075	0	0	0	0	0	4.15209
hsa-miR-4436b-5p	3.98089	0	0	2.33905	0	0	0	3.27531	0	0	0	0	0	0	0	0	0	2.95279	3.62018	4.0018	3.2288	0	0	3.53862	0	0	0	0
hsa-miR-4437	3.91107	0	0	0	0	2.75241	0	0	0	0	2.94353	0	0	0	0	0	0	0	0	0	3.29259	0	0	0	0	0	0	0
hsa-miR-4438	0	3.76809	0	0	0	0	0	0	0	0	0	0	0	0	0	0	0	0	0	0	0	0	0	0	0	0	0	0
hsa-miR-4439	0	3.54757	0	0	2.78873	0	0	0	0	0	0	0	0	0	0	0	0	0	4.39303	0	3.66479	4.1474	0	0	0	0	0	0
hsa-miR-4440	0	3.85782	0	0	0	0	0	3.59642	2.37603	0	0	0	2.74973	0	2.51068	0	3.54438	0	0	3.97765	4.74188	3.73025	0	0	0	0	0	3.5045
hsa-miR-4441	0	0	0	0	0	0	0	0	0	0	0	0	0	0	0	0	0	0	0	0	0	4.06481	0	0	0	0	0	0
hsa-miR-4442	-1.59186	-0.000473402	-0.0792817	0.284289	0.502097	-0.838991	0.421999	1.38476	0.44786	-0.148764	0.410216	-0.128942	0.289029	0.681253	-0.486657	-1.09233	-0.426553	-1.57063	0.558915	-0.21047	1.64252	0.365177	-0.544779	1.42331	-1.53618	-1.68172	0.000473402	0.493666
hsa-miR-4443	-0.391118	0.0609492	-0.121323	0.196219	0.473355	-0.723522	0.258389	1.81604	0.0499539	-0.0499539	1.72663	-0.109758	0.0885027	0.153442	-1.25375	-0.921489	-0.692102	-0.516886	-0.586613	0.0499855	1.30424	2.5068	-0.705709	-0.802732	-0.832489	-0.879137	0.279959	0.855136
hsa-miR-4444	0	0	0	0	3.50585	0	0	3.80022	5.55442	0	0	0	0	0	0	0	0	0	0	0	0	0	0	0	0	0	0	0
hsa-miR-4445-3p	0	3.41656	0	0	0	0	0	0	0	0	0	0	0	0	0	0	0	0	0	0	0	0	0	0	0	3.37889	0	0
hsa-miR-4445-5p	0	0	0	0	0	2.96181	0	0	0	0	0	0	0	0	0	3.09569	2.94087	0	0	0	0	0	0	0	0	0	0	0
hsa-miR-4446-3p	-1.08275	-0.0548059	0.0939246	0.3722	0.149092	-1.16597	0.0228155	1.9972	0.123897	-0.0688704	-0.222068	-0.796569	0.497806	0.263011	0.128016	-0.0228155	-0.572688	-1.30282	0.645366	-0.348894	2.60785	0.386058	-0.928969	-1.13445	-1.59236	-0.975976	0.0363461	1.04283
hsa-miR-4447	-0.0302287	-0.963846	0.127617	0.0302287	0.346047	2.31798	0.17052	1.74913	-0.0478948	-1.08515	-0.0457208	0.852978	0.177887	0.799284	0.239833	-1.46871	-0.465624	-1.88055	-0.640938	-0.0328379	1.63447	0.195343	-0.627929	-1.18942	-4.64202	-1.11466	0.25954	0.257285
hsa-miR-4448	-3.80969	0.50277	-0.43118	0.542651	0.43298	-1.00986	0.313455	1.67593	0.468696	0.729576	2.21267	0.130165	-0.130165	-0.480822	-3.80969	-0.748397	-3.80969	-0.474271	1.52728	-3.80969	1.33866	1.95581	-0.23185	-3.80969	-3.80969	-3.80969	0.927686	0.838976
hsa-miR-4449	-1.20861	-0.297938	-0.374857	-0.125786	0.420061	0.705104	-0.443123	-0.073338	1.0489	1.0593	1.27132	-0.662042	-0.293164	-0.708345	-0.888408	-0.720538	0.361212	-1.10793	0.369305	1.38396	0.284247	1.54767	0.073338	-1.30931	0.124118	-2.03714	1.75955	0.112088
hsa-miR-4450	0	0	0	0	0	2.92255	3.06582	0	3.13498	0	3.39011	0	3.0639	3.92207	2.7294	0	3.17347	3.04703	3.65728	0	3.95616	9.02799	0	0	0	0	0	0
hsa-miR-4451	-1.34809	2.32256	-1.34809	2.66598	-1.34809	-1.34809	1.34809	-1.34809	1.94202	1.80109	-1.34809	-1.34809	2.66352	-1.34809	1.90618	2.62903	2.66621	-1.34809	-1.34809	2.49394	3.69149	-1.34809	1.91383	-1.34809	-1.34809	-1.34809	2.6413	2.90536
hsa-miR-4452	0	0	0	0	3.44555	0	0	3.65369	0	0	0	0	0	0	0	0	0	0	0	0	0	0	0	0	0	0	0	0
hsa-miR-4454	-0.0403816	0.161085	-0.269714	-0.106713	0.539351	0.470186	-0.261768	0.120933	0.386114	0.0403816	0.314453	-0.764707	0.408205	0.488527	-2.99726	-0.0850037	-0.0930655	-15.4929	-2.66624	0.343354	0.458609	-0.134491	-0.794899	0.637128	-1.17299	-0.17452	0.173722	0.904543
hsa-miR-4455	0	0	0	0	0	2.70621	0	3.24098	0	0	0	0	0	0	0	0	0	0	0	0	0	0	0	0	0	0	0	3.26448
hsa-miR-4457	0	0	0	0	0	0	0	0	0	0	0	0	0	0	0	0	0	0	0	0	0	0	0	0	0	0	0	3.44959
hsa-miR-4458	0	0	0	0	4.19408	0	0	3.79507	0	0	0	0	0	0	0	0	0	0	4.071	0	3.59389	4.05415	0	0	0	0	0	0
hsa-miR-4459	-0.354571	-0.476348	0.11595	0.0998697	0.0918125	0.105468	0.472165	0.79739	0.221848	0.0207969	1.07241	-0.0207969	0.458965	1.28697	-0.586249	-1.04642	-0.224065	-2.04123	-0.520813	-0.566858	1.63887	2.26407	-0.680676	-2.29386	-1.92313	-2.12264	-0.644574	0.569755
hsa-miR-4461	0	3.93482	0	0	3.86456	0	0	3.09578	0	0	0	0	0	0	0	0	0	0	0	0	0	0	0	0	0	0	0	0
hsa-miR-4462	-0.754263	-4.47043	-0.759827	-0.744428	0.0287825	1.0767	-0.177491	0.626993	0.344379	0.038586	0.214239	0.604849	0.0647514	0.230461	0.361201	-1.05949	-0.432549	-1.73634	0.196736	-0.0287825	1.90313	1.68179	-0.450641	-4.47043	-0.976252	-4.47043	0.078994	-0.316594
hsa-miR-4463	-0.237483	0.0270988	0.177757	0.581437	0.802879	-0.233247	0.557721	1.93348	0.471489	-0.0270988	-0.489108	-0.0791347	0.266902	0.42705	-0.0281738	-0.792018	-0.214577	-0.963495	0.965955	0.213469	1.80831	-0.185752	-0.389459	-1.06685	-1.13449	-1.32829	0.569645	0.824914
hsa-miR-4464	3.73067	0	0	0	0	0	0	0	0	0	0	0	0	0	0	0	0	0	0	0	0	0	0	0	0	0	0	0
hsa-miR-4465	0	0	0	0	0	0	3.15304	3.70054	0	0	3.13248	0	0	3.14426	0	0	0	0	5.6471	0	3.90785	0	3.61164	0	0	0	0	5.58247
hsa-miR-4466	-1.14144	-1.14726	0.0235265	0.147829	0.00346264	-0.308486	-0.00346264	1.29738	0.468502	0.129553	0.224251	0.419253	0.151872	0.0855322	-0.125553	-0.798127	-0.0331113	-1.2985	0.171388	-0.044631	0.98621	-0.663331	-0.278668	-1.27249	-0.944774	-1.5641	0.191738	0.390986
hsa-miR-4467	-0.854506	-0.680189	0.880225	0.754779	0.189922	0.0751779	0.519352	1.34243	0.275225	-0.017506	0.1261	0.637547	0.225925	-0.644096	-0.718342	-0.33782	-0.159324	-1.69587	-0.145821	0.017506	1.42203	-0.513214	-0.195202	-2.23226	-0.775791	-2.24136	0.441558	0.114715
hsa-miR-4470	0	0	0	0	0	0	0	0	0	0	2.9896	0	0	3.19257	0	0	3.37653	0	0	0	3.68506	4.14169	0	0	0	0	3.2946	3.79902
hsa-miR-4471	0	0	0	0	0	0	0	0	0	3.14648	0	0	0	0	0	0	3.17376	0	0	0	3.69232	0	0	0	0	0	3.24853	0
hsa-miR-4472	-3.27263	0.12219	-3.27263	-3.27263	-0.240717	-0.0942343	0.65988	2.6017	-0.436463	-0.282954	-0.399759	0.0185396	0.604218	1.82019	1.5957	1.08787	-0.0185396	0.209615	-3.27263	0.492818	3.02065	0.358578	0.410728	-3.27263	-3.27263	-3.27263	-3.27263	0.0535518
hsa-miR-4473	3.92182	0	0	0	0	0	0	0	0	0	0	0	0	0	0	0	0	0	0	0	0	0	0	0	0	0	0	0
hsa-miR-4474-3p	0	0	0	0	2.74026	0	0	0	3.79301	0	0	0	0	0	0	0	0	0	0	4.02988	0	0	0	0	0	0	4.07773	3.33296
hsa-miR-4476	-0.246122	-0.115812	-3.67926	0.192059	0.478986	0.179035	0.404802	0.115812	0.561816	0.15294	1.76682	-0.683321	0.646169	1.13356	-3.67926	-3.67926	0.294251	-3.67926	-3.67926	-3.67926	0.1229	1.1255	-3.67926	-3.67926	-3.67926	-3.67926	-3.67926	1.83737
hsa-miR-4477a	0	0	0	0	0	0	0	0	0	0	0	0	0	0	0	0	0	0	0	0	0	3.27445	0	0	0	0	0	0
hsa-miR-4478	-3.34073	-3.34073	-0.987109	-0.122704	0.415563	-3.34073	0.77804	0.707805	1.19334	1.48396	0.514571	-0.200256	1.68256	0.188723	-0.879577	-3.34073	1.56773	-3.34073	0.31358	0.260421	1.13486	0.0163935	0.144696	-3.34073	-3.34073	-3.34073	-3.34073	-0.0163935
hsa-miR-4479	0.676975	-2.85068	0.318847	0.1995	0.547067	0.423018	-0.170846	1.12442	-0.415735	-2.85068	-2.85068	-0.577205	0.342248	-2.85068	-2.85068	-2.85068	0.93781	-2.85068	0.893764	0.425739	1.89938	-2.85068	0.170846	-2.85068	-2.85068	-2.85068	1.25277	0.599439
hsa-miR-4481	0	0	0	0	0	0	0	0	2.54291	0	2.82752	0	2.49693	3.80323	0	0	0	0	0	0	3.58396	4.87446	0	0	0	0	0	0
hsa-miR-4482-3p	0	0	0	0	0	3.30462	0	3.16423	0	0	0	2.66588	2.71303	3.49286	0	0	0	0	0	0	3.27142	0	0	0	0	0	0	4.00549
hsa-miR-4483	-1.22361	-1.22361	-1.22361	1.80849	-1.22361	3.47683	2.53719	3.18823	2.51586	2.53333	2.43775	1.22361	2.7927	3.67925	2.63929	-1.22361	-1.22361	-1.22361	-1.22361	2.16156	3.75492	2.97341	-1.22361	-1.22361	-1.22361	-1.22361	-1.22361	-1.22361
hsa-miR-4484	-0.291548	-0.325786	-0.0396599	0.477676	0.65891	-0.200448	0.713261	2.03186	0.698865	-0.723376	0.826965	-0.50423	0.097209	0.612146	-1.64106	-0.29584	0.25181	1.08076	-0.51739	1.7145	0.984387	1.74578	-1.03644	-0.877971	-1.65374	-1.11726	-0.31347	0.0396599
hsa-miR-4485	0	0	0	0	4.04954	0	0	3.70329	3.18158	0	0	0	0	0	0	3.99419	3.8769	0	5.5259	4.57882	3.51006	5.53257	3.14575	0	0	0	0	3.60994
hsa-miR-4486	-0.980903	-0.922936	0.234079	0.181851	-0.224906	-0.409786	0.338467	1.92187	0.559701	0.215609	0.34435	0.520032	0.408143	0.431785	-0.377044	-0.958284	-0.0107317	-1.22306	-0.0734244	0.0107317	2.23064	0.989443	-0.394036	-1.13663	-1.12422	-1.77009	-0.0524522	0.427937
hsa-miR-4487	-2.8183	-2.8183	-0.366028	-0.0529432	0.76288	-2.8183	-0.448447	1.71036	2.42751	0.0529432	-0.128949	-2.8183	0.582644	-2.8183	-2.8183	0.780487	1.63887	-2.8183	1.35769	0.512831	1.76682	1.66911	0.850274	-2.8183	-2.8183	-2.8183	0.77308	0.509718
hsa-miR-4488	-0.396395	-0.106168	0.342044	0.715383	0.424555	-0.217095	0.306678	1.63137	-0.0107581	-0.363624	0.11868	0.0607616	0.0107581	0.0114576	-0.280542	-0.642697	-0.194741	-1.11398	0.698475	0.527038	1.3703	-0.39591	-0.14494	-0.704478	-0.43552	-1.06893	0.736323	0.914928
hsa-miR-4489	-3.15119	-3.15119	-0.296943	-0.134997	-0.0149828	0.64194	0.446612	1.02913	1.25369	0.79695	0.559181	0.459895	0.879306	-3.15119	-0.0823953	-3.15119	0.735799	-3.15119	-3.15119	0.164963	0.0351853	1.25409	0.0149828	-3.15119	-3.15119	-3.15119	0.87326	-3.15119
hsa-miR-4490	0	0	0	0	0	0	0	0	0	0	0	0	0	3.23903	0	0	0	0	3.6911	0	3.65478	0	0	0	0	0	0	0
hsa-miR-4491	3.29657	0	0	0	3.00916	0	0	3.84011	0	0	4.89038	0	0	0	0	0	0	0	0	0	3.12072	4.61227	0	0	0	0	0	0
hsa-miR-4492	0.217735	0.442315	0.678221	0.792862	0.848836	-0.0542107	0.144932	1.21756	0.256451	-0.421222	0.775213	0.0542107	-0.098459	-0.676264	-0.885632	-1.65468	-0.124366	-2.09113	0.726707	-0.066584	1.27197	-0.398873	-0.122986	-1.12773	-1.17074	-1.4048	0.526284	0.795131
hsa-miR-4495	0	0	0	0	0	0	0	0	0	0	0	0	0	0	0	0	0	0	0	0	0	0	0	0	0	0	0	3.44334
hsa-miR-4496	0	3.56587	0	0	0	0	0	3.24098	3.43726	2.66001	0	0	3.89193	0	0	0	0	0	0	0	3.52747	0	2.83245	0	0	0	0	0
hsa-miR-4497	0.0888591	-0.154339	0.114206	0.981711	1.10424	-0.566106	1.05255	0.551654	0.264473	-0.328915	1.04629	-0.230158	-0.393782	-0.95677	-1.82873	-1.00729	-0.525616	-2.49083	0.732038	0.0388165	0.661414	-0.0388165	0.921429	-0.45357	-0.800253	-2.26305	0.691721	0.904752
hsa-miR-4498	-1.0378	-1.42553	0.178928	-0.273912	-0.929931	-0.190911	-0.0941751	1.77279	0.0702577	-0.0229036	0.0629694	0.636702	0.390503	0.321567	0.0229036	-0.7806	0.188079	-0.765634	-0.310379	0.46382	2.51626	0.0883131	-0.473213	-1.43628	-1.54822	-1.59509	0.371516	0.414844
hsa-miR-4499	4.40937	0	0	0	4.08323	0	0	3.92945	2.51392	0	0	0	0	0	0	0	0	0	0	0	4.10529	0	3.22727	0	0	0	0	3.39063
hsa-miR-449a	0	3.39608	0	0	0	0	0	0	0	0	0	0	0	0	0	0	0	3.22571	0	0	0	0	0	0	0	0	0	0
hsa-miR-449b-3p	3.51261	3.36051	2.3524	0	0	5.71788	2.87751	3.16822	2.33621	0	0	3.31452	3.42908	0	0	0	0	0	0	0	3.39349	0	2.83854	0	0	0	0	4.00283
hsa-miR-449c-3p	0	0	0	0	0	0	2.65017	0	0	0	0	0	0	0	0	0	0	0	0	0	0	0	0	0	0	0	0	0
hsa-miR-449c-5p	3.7157	0	0	0	4.25835	0	0	0	0	0	0	0	0	0	0	0	3.48891	0	3.76756	0	3.48945	0	0	0	0	0	0	0
hsa-miR-4500	0	0	0	0	0	0	0	0	0	0	0	0	0	0	0	0	0	0	0	0	0	0	0	0	0	0	0	3.76072
hsa-miR-4501	0	0	0	0	0	0	0	0	0	0	0	0	0	0	0	0	0	0	3.52524	0	0	0	0	0	0	0	0	0
hsa-miR-4502	-0.209806	1.68298	-0.363706	0.772044	1.4392	-0.0888738	0.0484474	0.0662138	0.520791	0.389374	0.538443	-1.57354	-0.433348	-0.0484474	-4.39083	-4.39083	-4.39083	-4.39083	-0.526061	-4.39083	0.723938	1.15502	-4.39083	0.131506	-0.877054	0.996649	0.226099	0.936506
hsa-miR-4503	0	0	0	0	0	0	0	0	0	0	0	0	0	0	0	0	0	0	0	0	0	0	0	0	0	0	3.39241	0
hsa-miR-4504	0	0	0	0	0	0	0	0	0	0	0	0	0	0	2.428	0	0	0	0	0	0	0	0	0	0	0	0	0
hsa-miR-4505	-1.18567	-0.794434	0.158479	0.670966	0.71088	-1.95036	0.398311	1.18959	0.536481	0.021747	0.58748	-0.39849	-0.021747	-0.279971	-0.568258	-1.21109	0.152241	-1.74739	0.321053	1.08902	1.54855	-0.0929894	-0.304618	-1.68527	-1.33398	-2.06998	0.172988	0.226655
hsa-miR-4506	-2.72942	-2.10693	-2.38359	-1.78831	-0.744493	-2.0013	-2.00483	2.43718	1.30174	-0.616406	0.0048049	-1.40021	0.364098	-0.264776	-1.10285	0.876274	1.85607	0.0185276	-0.361163	0.583214	2.49666	0.894737	0.752942	2.4539	-0.887659	0.288813	-0.0048049	0.423255
hsa-miR-4507	-1.35183	-1.09252	0.00103074	0.365996	0.470132	-0.929934	0.594927	1.7667	0.28428	0.175406	0.682903	-0.172273	0.259338	0.541484	-0.533441	-0.675091	0.101809	-1.39013	-0.091888	-0.00103074	1.50432	0.931666	-1.01727	-1.61246	-1.5602	-1.47478	-0.339756	0.550099
hsa-miR-4508	-1.51424	-0.570443	0.344785	0.275947	-0.00230923	0.0269	0.143438	0.965887	-0.170826	-0.481066	0.0849432	0.25981	0.119359	-0.415329	-1.18378	-0.640383	0.293263	-1.56201	0.00230923	0.456124	1.13314	-0.942106	-0.253512	-1.75067	-0.902773	-1.94241	0.271436	0.126048
hsa-miR-450a-5p	0	3.73245	0	0	0	0	0	0	0	0	0	0	0	0	0	0	0	0	0	0	0	0	0	0	0	0	0	0
hsa-miR-450b-3p	0	0	0	0	0	0	0	0	0	0	0	0	0	0	0	0	0	0	0	3.59627	0	3.33955	0	0	0	0	0	3.4393
hsa-miR-4510	-0.726445	1.33377	0.91315	1.26312	1.37344	-0.635074	0.497327	-1.95438	0.873754	0.904291	0.190898	-1.44459	-0.580614	-5.52221	-5.52221	-2.30589	0.872087	-0.737339	0.739315	-0.190898	-1.09553	1.18384	1.0679	-0.925285	-1.16426	-5.52221	0.658623	1.268
hsa-miR-4513	-0.0840355	-0.0346029	-0.490326	-0.314128	0.0846058	-0.279989	-0.233298	1.91085	0.0511553	-0.0228307	0.429963	-0.797286	0.390531	1.04093	0.38169	-0.167351	0.0228307	-0.992205	0.159354	-0.493173	2.41429	1.75182	0.1725	-0.240022	-0.802067	-0.250513	0.586891	1.25073
hsa-miR-4514	0	0	0	0	0	0	0	0	0	0	0	0	2.92504	0	0	0	0	0	0	0	0	0	0	0	0	0	0	0
hsa-miR-4515	0.187781	0.405766	-0.864982	-0.63092	-0.25831	0.0969614	0.294451	-3.82247	0.349515	-0.585334	0.0073008	-0.237818	0.0713015	-0.778525	-3.82247	0.350219	-0.0475589	-3.82247	0.13896	0.411129	0.377424	-0.0073008	0.25022	0.0423445	-0.819217	-0.552353	-3.82247	1.53878
hsa-miR-4516	-0.693832	0.125769	0.178951	0.602874	0.694358	-0.308842	0.296828	1.91671	0.0375928	-0.167607	-0.127897	-0.00113974	0.157408	0.244027	-0.15288	0.775166	-0.270969	-1.16289	-0.244191	-0.207927	2.13548	0.00113974	-0.245112	-1.33881	-1.50509	-0.593035	0.121983	1.22731
hsa-miR-4518	0	0	0	0	2.67155	0	0	0	0	0	0	0	0	0	0	0	0	0	0	0	0	0	0	0	0	0	0	0
hsa-miR-4519	0	0	0	0	0	3.072	0	0	0	0	0	2.26556	2.85082	0	0	0	0	0	0	3.41696	0	0	0	0	0	0	0	0
hsa-miR-451a	-5.03648	-0.468543	-0.559344	0.248858	4.71506	-0.930969	0.541225	-5.03648	1.00579	-5.03648	-2.03952	-1.5081	-2.29181	-5.03648	-5.03648	1.52769	4.69432	2.21363	4.02299	4.36636	-0.248858	-0.337636	4.12581	1.55956	0.379377	-0.656617	3.66257	2.19082
hsa-miR-452-3p	0	0	0	0	2.99397	4.22553	0	0	0	0	0	0	0	0	0	0	0	0	4.15929	0	3.84584	0	0	0	0	0	0	0
hsa-miR-452-5p	3.67912	0	0	2.86109	3.86062	3.97808	0	0	0	0	0	0	0	0	0	0	0	0	4.47025	3.72549	3.34519	3.22995	0	0	0	0	3.86108	0
hsa-miR-4520b-3p	0	0	0	0	0	0	0	0	0	0	0	0	0	0	0	0	0	0	0	0	0	0	0	0	0	3.7404	0	0
hsa-miR-4521	0	0	0	0	2.63082	0	0	0	0	0	0	0	0	0	0	0	2.95601	0	0	0	0	0	0	0	0	0	0	0
hsa-miR-4522	0	0	0	0	0	0	2.36949	0	0	0	2.88275	0	0	0	0	0	0	0	4.09714	0	0	0	0	0	0	0	0	5.0352
hsa-miR-4523	0	0	0	0	0	0	0	0	0	0	0	0	2.48703	0	0	0	0	0	0	0	0	3.289	0	0	0	0	0	0
hsa-miR-4524a-3p	0	4.02348	0	0	0	0	0	0	0	0	0	0	0	3.2386	0	0	0	0	0	0	0	0	0	0	0	0	0	0
hsa-miR-4524a-5p	0	0	0	0	0	0	0	0	0	0	0	0	0	0	0	0	0	0	0	0	0	3.45219	0	0	0	0	0	0
hsa-miR-4524b-3p	0	0	0	0	0	0	0	0	0	0	0	0	0	0	0	0	0	0	0	0	0	3.54847	0	0	0	0	0	0
hsa-miR-4524b-5p	0	0	0	0	0	0	0	0	0	0	0	0	0	0	0	0	0	0	0	0	0	3.3406	0	0	0	0	0	0
hsa-miR-4525	0	0	0	0	0	0	0	0	3.37974	0	2.89461	0	3.59043	4.1357	3.51609	3.32479	3.2883	0	4.93851	0	4.24894	6.37014	3.1386	0	3.02129	0	0	0
hsa-miR-4526	0.661627	0.807613	-0.62769	0.562096	1.24198	0.842121	-0.0591345	1.93518	-0.175988	-0.866383	0.0591345	-0.120633	0.632263	-3.47575	-3.47575	-0.246369	-0.13164	-3.47575	-3.47575	0.65778	1.53505	1.30874	-0.696472	0.319134	-3.47575	-3.47575	0.775712	2.09232
hsa-miR-4527	0	0	0	0	0	0	0	0	0	0	0	0	0	0	0	0	2.94593	0	0	0	0	0	0	0	0	0	0	0
hsa-miR-4528	3.29624	0	0	0	0	0	0	0	0	0	0	0	0	0	0	0	0	0	0	0	0	0	0	0	0	0	0	0
hsa-miR-4529-3p	0	0	0	0	0	0	0	0	0	0	0	0	0	0	0	0	0	0	0	0	0	0	2.84261	0	0	0	0	3.50338
hsa-miR-4530	-0.805716	-1.05214	-0.379484	0.33192	0.0440253	-0.917027	0.309144	0.798109	-0.0101121	-0.496686	0.559966	-0.350982	0.0101121	-0.658985	-1.7158	-1.08074	0.133326	-1.61273	0.488417	0.174014	0.823055	0.842979	0.20983	-1.20305	-1.63069	-1.85039	0.36318	0.694813
hsa-miR-4531	0	0	0	0	0	0	3.14457	0	0	0	3.11523	0	0	0	0	0	0	0	0	0	0	4.43173	0	0	0	0	0	0
hsa-miR-4532	-0.3186	0.356982	-0.199671	0.316364	0.456006	0.270065	-0.0977945	1.59412	0.175431	-0.0973815	-0.193493	-1.18548	0.0973815	0.834726	-1.44333	-1.25461	-0.925172	-0.38092	-2.08176	-0.127015	1.00513	0.554074	-0.360121	0.755131	-1.49101	0.460322	0.35358	0.78042
hsa-miR-4533	0	3.46845	0	0	3.14015	0	0	3.65084	0	0	0	0	2.40927	0	0	0	3.47847	0	5.05827	0	4.02959	4.28553	0	0	0	0	0	3.55209
hsa-miR-4534	-0.254503	0.495268	-1.04938	-0.239392	0.514961	1.09452	0.185435	1.20491	0.366256	0.027711	0.490569	0.615846	0.278954	0.911987	0.294237	-0.619834	-0.346888	-1.95886	-0.777102	0.105152	1.37756	-0.0510395	-1.30833	-1.27667	-1.02367	-1.3472	-0.787184	-0.027711
hsa-miR-4535	0.366841	-0.605191	0.0457095	1.59462	0.545496	-0.499764	1.60627	0.779947	0.577349	-0.274707	1.31607	-0.0457095	-0.368773	-0.689103	-1.2519	-1.03947	-0.11227	-2.97209	1.58771	0.206637	1.12486	-0.609462	1.5413	1.29162	-1.24693	-1.79897	-0.166526	1.61773
hsa-miR-4537	0	0	0	0	0	0	0	0	0	0	0	0	0	0	0	0	0	0	0	4.15126	0	0	0	0	0	0	0	0
hsa-miR-4538	0	0	0	0	0	0	3.01098	0	0	0	5.07281	0	3.16909	3.77264	0	0	0	0	0	0	3.89623	3.4219	0	0	0	0	0	3.88603
hsa-miR-4539	-0.19756	0.427981	0.155294	0.75734	1.03998	-3.74442	-0.0246547	1.45421	0.117716	-0.702426	1.17257	-0.552432	0.405782	-0.0049013	-1.20386	-3.74442	0.0049013	-3.74442	0.170998	0.419443	1.11204	0.999159	-0.460959	-0.0571246	-3.74442	-3.74442	-3.74442	0.605812
hsa-miR-454-3p	0	0	0	3.16834	3.17842	0	0	0	2.63541	2.63767	3.13979	0	2.66778	0	0	0	5.10473	0	0	0	0	0	0	0	0	0	3.41843	0
hsa-miR-4540	0	0	0	0	2.73074	0	0	0	0	0	0	0	0	0	0	0	0	0	4.21505	0	0	0	0	0	0	0	0	0
hsa-miR-455-3p	1.30835	1.80666	1.40611	2.04435	2.34361	0.979317	1.19397	0.321323	-0.0680273	-0.183081	-3.10829	0.0680273	-0.454693	-3.10829	-3.10829	-3.10829	2.27892	-0.160824	0.375197	-3.10829	0.349415	-3.10829	-3.10829	0.356571	-3.10829	-3.10829	0.702251	-3.10829
hsa-miR-4632-3p	0	3.44869	0	0	2.94482	0	0	0	0	0	0	0	0	0	0	0	0	0	0	0	0	0	0	0	3.1535	0	0	3.61145
hsa-miR-4632-5p	-1.32122	-1.31241	0.0712123	-0.101619	-0.449799	1.10726	0.129861	1.43163	0.461396	0.323442	0.463175	0.826937	0.710037	0.131678	-0.0154539	-0.536916	-0.0486916	-1.58401	-0.200506	0.212632	2.14151	-0.476401	-0.472041	-2.27603	-1.20032	-1.9928	0.0154539	0.219427
hsa-miR-4633-3p	0	0	0	0	0	2.75312	0	0	0	0	2.54868	0	0	0	0	0	0	0	0	3.39081	0	0	0	0	0	0	0	0
hsa-miR-4633-5p	-3.34034	1.32443	-0.333583	-0.21088	0.506429	0.0518537	-0.340056	2.72459	0.571952	-3.34034	1.65335	-3.34034	1.23689	0.843878	-3.34034	-3.34034	0.608848	-0.0518537	-3.34034	-3.34034	0.743608	0.905449	-3.34034	2.95554	-3.34034	-3.34034	0.244553	3.6633
hsa-miR-4634	-0.511972	0.450356	0.103176	0.477319	0.608362	0.704261	0.15867	1.11311	0.229417	-0.120816	0.0630073	-0.755909	0.418827	0.891273	-1.73971	-0.534824	-0.668356	-0.279121	-0.627289	-0.16739	0.898747	-0.375333	-0.731802	-0.0630073	-1.5371	0.478458	-0.117506	0.65031
hsa-miR-4635	0	0	0	2.49248	0	0	0	0	0	0	0	0	0	0	0	0	2.97528	0	0	0	0	6.32582	0	0	0	0	0	0
hsa-miR-4636	0	0	0	0	3.97329	0	0	3.80022	3.32254	0	0	0	0	0	0	0	0	0	0	0	0	0	0	0	0	0	0	3.38942
hsa-miR-4638-3p	0	3.79094	0	2.90141	3.431	2.6621	3.90615	0	0	2.6162	4.91693	0	0	0	0	0	4.07371	0	4.20255	0	0	6.22232	0	0	0	0	0	3.75894
hsa-miR-4638-5p	-0.600346	-0.432117	0.188925	0.765065	0.649915	0.0189461	1.54744	0.308324	0.710422	0.230431	1.78747	0.894088	-0.0189461	-0.309428	-0.994451	-0.666627	-0.227715	-5.15288	0.2345	-0.492333	1.32062	0.585991	-1.33711	-5.15288	-1.3017	-5.15288	-0.902512	0.205984
hsa-miR-4640-3p	0.608521	0.938652	-0.267748	-0.680725	-0.0884019	0.906682	-0.646582	0.680023	-0.734013	-0.710663	-0.327856	-1.07359	0.0685735	0.0523322	-1.30752	-0.0706148	-0.427898	-0.335477	0.106371	0.169846	1.61006	1.13831	-0.0523322	0.819665	-0.826126	0.588668	0.479602	1.79422
hsa-miR-4640-5p	-0.292126	-0.0015605	-0.108365	0.50922	0.812948	-0.387339	0.528259	1.98697	0.362297	0.396443	0.484262	-0.298762	0.405104	0.689134	0.182479	-0.94857	-0.175532	-1.71484	0.485724	-0.0431602	2.08263	1.16655	-0.964721	-1.5761	-1.99354	-0.87849	-0.273279	0.0015605
hsa-miR-4643	0	0	0	0	0	0	0	0	0	0	0	0	0	0	0	0	0	0	0	0	0	0	0	3.88869	0	0	0	0
hsa-miR-4644	0	0	0	0	0	0	0	0	0	0	0	0	0	0	0	0	0	0	0	4.19011	0	0	0	0	0	0	0	0
hsa-miR-4646-3p	0	4.06276	0	0	0	0	0	0	0	0	0	0	0	0	0	0	0	0	0	3.42926	3.63999	0	0	0	0	0	0	0
hsa-miR-4646-5p	0.456505	-0.0331505	-1.01565	-0.80498	0.35816	-3.38389	-0.531946	0.853164	0.313308	0.135525	-0.262491	-1.10738	0.44624	-3.38389	-3.38389	0.0331505	0.144616	-3.38389	0.705912	0.0569169	0.150506	0.941806	0.0537231	-3.38389	-0.346449	-3.38389	-0.152097	0.585823
hsa-miR-4647	3.32085	0	0	2.37952	0	0	0	0	0	0	0	0	0	0	0	0	0	0	0	0	3.53205	3.62607	0	0	0	0	3.42969	0
hsa-miR-4648	-3.1481	-3.1481	-0.399815	-0.607626	-3.1481	-3.1481	0.00338863	1.33758	1.354	1.53754	1.30567	-3.1481	1.11776	-0.00338863	-0.0830581	0.0533573	0.456474	-3.1481	0.975443	-3.1481	1.09103	-3.1481	0.638844	0.398248	-3.1481	-3.1481	1.13936	2.17708
hsa-miR-4649-3p	0	3.99497	0	0	3.70038	0	2.39788	3.33237	0	0	0	0	0	0	0	0	0	0	3.5974	3.78783	3.37506	3.627	0	0	0	3.32549	0	4.28391
hsa-miR-4649-5p	-0.928019	0.139508	0.0457948	0.573493	0.615645	-0.956904	0.19077	2.03562	0.211875	-0.109977	-0.3528	-0.107042	0.0282208	0.174486	0.703258	-0.801088	-0.644822	-1.48916	1.1144	-0.0282208	2.32913	0.0534258	-0.825063	-1.06648	-1.74835	-0.774894	-0.356066	0.269615
hsa-miR-4650-3p	0	0	0	0	0	0	0	0	0	0	0	0	0	3.09536	0	0	0	0	0	0	0	0	0	0	0	0	0	0
hsa-miR-4651	-1.39859	-0.627095	-0.0233517	0.237274	-0.0714584	-0.887831	0.420472	1.95389	0.720262	0.722856	0.658395	0.0677919	0.568621	1.19449	0.587983	-0.433494	-0.187061	-0.881927	-0.0384971	-0.0944143	2.23569	0.608871	-0.590543	-1.68814	-1.38206	-1.07825	0.0233517	0.387401
hsa-miR-4652-3p	0	0	0	0	0	0	0	0	0	0	0	0	0	0	0	0	0	0	0	0	0	0	0	0	0	0	0	3.61504
hsa-miR-4652-5p	0	0	0	0	0	0	0	0	0	0	0	0	0	0	0	0	0	0	0	0	0	3.24149	0	0	0	0	0	0
hsa-miR-4653-3p	0	0	0	0	0	0	0	0	0	0	4.26385	0	0	0	0	0	0	0	0	0	0	5.31181	0	0	0	0	0	0
hsa-miR-4654	0	0	0	0	0	0	0	3.62445	3.26113	3.61567	2.62804	0	3.36967	3.63979	0	3.73478	4.08419	0	0	0	4.86946	0	3.31585	0	0	0	0	4.15559
hsa-miR-4655-3p	1.82476	-2.87568	-0.0396469	0.57198	1.01683	0.428921	0.671737	1.3207	-0.137081	-2.87568	-2.87568	0.0396469	-2.87568	-2.87568	-2.87568	-2.87568	-2.87568	-2.87568	2.19296	0.755488	0.351669	-2.87568	0.879063	0.776499	-2.87568	-2.87568	1.11759	1.82022
hsa-miR-4655-5p	-0.653438	0.0462537	-0.221608	0.3932	0.510655	-0.513211	0.64857	1.60602	0.0790187	0.156776	0.722335	0.0886889	-0.0542555	1.36261	-0.0462537	-1.10718	-0.115359	-1.2759	0.736656	-0.379293	2.32473	1.89818	-0.844227	-2.05446	-1.33045	-0.55587	-0.600064	0.216151
hsa-miR-4656	-0.537055	-0.0496838	-1.09051	-0.118391	-0.408313	-1.29925	0.0496838	1.11269	0.977179	0.664173	0.847761	-0.457865	1.13732	0.525144	-0.388493	-0.185417	0.939241	-1.79397	0.191434	0.412146	2.00188	-0.0958906	0.427429	-1.23217	-1.08547	-1.48927	0.231482	0.842425
hsa-miR-4657	-0.541358	-0.000771104	-0.795769	-0.365513	0.308966	-4.49623	-1.61883	1.13299	1.4189	0.000771104	0.463954	-1.77854	0.372878	0.169995	-4.49623	-0.287821	0.35513	-0.929704	-4.49623	0.163786	1.41251	1.67859	-0.272161	1.60131	-0.3959	-0.0941686	0.788252	0.178784
hsa-miR-4658	0	0	0	0	0	0	0	0	0	0	0	0	2.74564	0	0	0	0	0	0	0	0	0	0	0	0	0	0	0
hsa-miR-4659a-3p	0	0	0	0	0	0	0	0	0	0	0	0	0	0	0	0	0	0	0	0	0	3.58923	0	0	0	0	0	0
hsa-miR-4659a-5p	3.45493	0	0	0	0	0	0	0	0	0	2.72529	0	0	0	0	0	0	0	0	0	0	0	0	0	0	0	0	0
hsa-miR-4660	0	0	0	0	0	0	0	0	0	0	0	0	0	0	0	0	0	0	3.6957	0	0	0	0	0	0	0	0	0
hsa-miR-4661-5p	0	0	0	0	0	0	0	0	0	0	0	0	0	0	0	0	0	0	3.8482	0	0	0	0	0	0	0	0	0
hsa-miR-4662a-5p	0	0	0	0	0	0	0	0	0	0	0	0	0	0	0	0	0	0	0	0	0	0	0	0	0	3.32193	0	0
hsa-miR-4662b	0	3.9702	0	0	3.54245	0	0	3.09159	0	0	0	0	0	0	0	0	0	0	0	0	0	0	0	0	0	0	0	0
hsa-miR-4663	0	3.70195	0	0	0	0	0	0	0	0	0	0	0	0	0	0	0	0	0	3.46855	0	0	0	0	0	0	0	0
hsa-miR-4664-3p	0	0	0	0	0	2.96354	0	0	0	0	0	0	0	0	0	0	0	0	4.24574	4.05195	3.60874	0	0	0	0	0	3.21072	4.859
hsa-miR-4664-5p	-0.450762	0.0098154	-0.340921	0.00147699	0.378878	0.484919	-0.0710374	1.5963	0.237496	-0.460637	0.00671204	-0.00147699	0.520766	1.37235	-0.661833	-1.10127	-0.652129	0.409781	-3.7516	-1.00415	0.536719	0.603405	-1.83298	-0.0130076	-2.34999	0.207101	-0.685954	0.493305
hsa-miR-4665-3p	0.683405	0.839765	-0.327547	-0.0672478	0.646729	0.999083	-0.64703	0.879385	1.05717	-0.578609	-0.371706	-0.856714	0.0672478	0.259044	-1.61219	-0.411078	-0.352457	-1.12978	-0.15118	0.0831972	0.743715	0.413261	-0.155058	0.250352	-1.10268	-0.220811	0.603344	1.95318
hsa-miR-4665-5p	-0.794308	-0.869715	0.0797266	0.340635	0.196557	-0.510379	0.327301	1.42274	0.0277757	-0.377934	0.562664	0.08714	-0.162926	0.559723	-0.184695	-0.822882	-0.0277757	-1.07318	0.702146	0.0388428	1.57384	1.25594	-0.764494	-1.08047	-0.982993	-1.0143	-0.0839035	0.717351
hsa-miR-4667-3p	0	0	0	0	0	3.47677	0	0	0	0	0	0	0	0	0	0	0	0	0	3.34328	0	0	0	0	0	0	0	3.4427
hsa-miR-4667-5p	-0.977991	0.0420635	-0.492622	0.296277	0.978701	-0.335683	0.846609	0.616261	0.563744	0.357487	1.27424	-0.996178	0.314027	0.837478	-2.50477	-1.80483	-0.583796	-1.27227	-1.24562	-0.910722	0.698114	2.22657	-0.629377	-1.25193	-1.32181	0.448985	-0.0420635	0.429487
hsa-miR-4668-3p	0	3.35554	0	0	0	0	0	0	0	0	0	0	0	0	0	0	0	0	4.01197	3.63718	0	0	0	0	0	0	3.20463	0
hsa-miR-4669	0	0	0	0	0	0	2.89383	0	3.44685	0	0	0	3.83986	3.04171	0	0	2.93591	0	0	0	0	4.95948	0	0	0	0	0	0
hsa-miR-4670-3p	0	0	0	0	0	0	0	3.34083	0	0	0	0	0	0	0	0	0	0	0	0	0	0	0	0	0	0	0	3.79545
hsa-miR-4671-3p	0	0	0	0	0	0	0	17.4107	0	0	0	0	0	0	0	0	0	0	0	0	0	3.28179	0	0	0	0	0	0
hsa-miR-4671-5p	0	0	0	0	3.88674	0	0	3.3729	0	0	0	0	0	0	0	0	0	0	0	0	3.2295	0	0	0	0	0	0	0
hsa-miR-4672	0	0	0	0	0	0	0	0	0	0	0	0	0	0	0	0	3.77846	0	0	0	3.71881	4.02672	0	0	0	0	0	0
hsa-miR-4673	-2.84595	0.938035	-2.84595	0.0480968	0.923439	-0.0480968	-2.84595	0.978644	0.200934	0.097784	0.896971	-2.84595	0.135751	0.392941	-2.84595	-2.84595	0.561871	-2.84595	-2.84595	-2.84595	1.69331	2.08657	-2.84595	-2.84595	-2.84595	-2.84595	0.5928	1.85214
hsa-miR-4674	-0.824151	-0.958733	0.629121	0.501349	-0.0728196	-0.789647	0.19906	1.76747	0.0726141	-0.696448	-0.0188894	0.345618	0.589755	0.0188894	-0.469468	-1.09236	0.316638	-0.806343	0.934625	0.782074	2.48802	-0.538841	-0.148084	-1.28472	-0.737202	-1.41507	0.735557	0.564027
hsa-miR-4675	0.0549364	0.732248	-0.0704024	0.700005	1.39278	-0.626153	-0.0603376	2.10532	0.567907	-0.556206	0.133603	-0.209242	0.293096	-0.00699411	-0.589305	-1.49292	-0.341955	-2.03723	1.44153	0.125537	1.27017	-0.651938	0.104834	-0.414187	-1.68246	-1.10517	0.00699411	0.747197
hsa-miR-4676-3p	0	0	0	0	0	0	0	0	2.58723	0	0	0	0	3.95104	0	0	0	0	0	3.47856	0	0	0	0	0	0	0	0
hsa-miR-4677-5p	0	0	0	0	3.60826	0	0	3.33592	4.95995	0	0	0	0	0	0	0	0	0	0	0	0	0	0	0	0	0	0	0
hsa-miR-4680-5p	0	0	0	0	0	0	0	0	0	0	0	0	0	0	0	0	0	0	0	0	0	3.46077	0	0	0	0	0	0
hsa-miR-4681	0	0	0	0	0	0	0	4.33471	0	0	0	0	0	3.9786	0	0	0	0	0	0	4.7072	0	0	0	0	0	0	0
hsa-miR-4682	0	3.61409	0	0	0	0	0	0	2.6918	0	2.63323	0	0	0	0	0	3.72643	0	3.5351	3.88185	3.7057	0	3.1163	0	0	0	4.12068	4.46245
hsa-miR-4683	0	0	0	0	0	0	0	0	0	0	0	0	0	0	0	0	0	0	3.7896	3.97765	0	0	0	0	0	0	0	0
hsa-miR-4684-3p	0	0	0	0	0	0	0	0	0	0	2.98808	0	0	0	0	0	0	0	0	0	0	3.58547	0	0	0	0	0	0
hsa-miR-4684-5p	3.88866	0	0	0	4.20182	0	0	3.60232	0	0	0	0	0	0	0	0	0	0	0	0	3.40352	0	0	0	0	0	0	0
hsa-miR-4685-3p	0	0	0	0	0	0	0	0	0	0	0	0	0	0	0	0	0	0	3.68061	0	0	0	0	0	0	0	0	0
hsa-miR-4685-5p	-0.0441449	-0.682166	0.0834688	0.464014	1.07323	-0.581744	0.361111	1.57487	0.362371	0.10889	-0.216422	-0.332737	0.189596	0.478373	-0.473684	-1.14882	-0.37157	-1.34398	0.523378	0.0441449	1.39201	-0.382323	-0.0465225	-0.400438	-4.39489	-0.238405	0.305829	0.441559
hsa-miR-4686	0	0	0	0	3.46905	0	0	3.51638	0	0	0	0	0	0	0	0	0	0	0	0	0	0	0	0	0	0	0	0
hsa-miR-4687-3p	-1.06896	-0.268888	0.000398797	-0.0137165	0.202339	-0.42949	0.191031	1.66341	0.0611064	-0.000398797	0.076691	0.0951548	0.151944	-0.0308771	-0.0224887	-0.939022	0.149965	-1.06847	0.245061	0.96548	2.12578	-0.110633	-0.37803	-1.18357	-0.592407	-0.8503	0.325492	0.587945
hsa-miR-4687-5p	1.9798	0.438126	1.23659	1.03073	0.54182	3.37615	0.666288	-1.82498	0.820154	0.0809801	1.02848	1.32086	0.76992	-1.52208	-5.77584	-0.629093	-0.548434	-2.99202	-0.287389	-0.597408	-1.79969	-2.03324	-0.0809801	-0.709978	-1.50502	-5.77584	0.273003	1.40574
hsa-miR-4688	-0.355479	-0.483545	0.248536	0.938432	1.04315	-1.15051	2.07706	1.203	0.919536	0.271315	1.50226	-0.161614	0.573899	1.47322	-0.530785	-0.288621	-0.194246	-1.418	0.0369682	-0.604917	2.34826	2.14356	-0.502055	-2.06079	-1.37072	-1.76903	-0.0369682	0.758276
hsa-miR-4689	-0.170502	0.0663615	-0.465503	0.0241942	0.236535	1.07174	-0.0233416	1.54295	-0.102908	-0.411669	0.00622226	0.116383	0.12532	-0.00622226	0.0540545	-0.451113	-0.511685	-1.74407	0.147116	0.0183282	1.99249	0.62657	-0.625562	-0.167423	-1.55754	-0.473424	-0.451971	1.22891
hsa-miR-4690-3p	-4.50086	0.00973551	-0.26541	-0.00973551	0.168759	0.246806	0.0533764	-4.50086	1.04109	0.731916	0.382617	-1.74746	1.36902	0.459142	-4.50086	-0.419052	-0.0628408	-0.686388	-0.492226	1.1689	0.146358	-4.50086	-0.0332267	0.928583	-1.38129	-0.533783	0.799953	1.10667
hsa-miR-4690-5p	-0.59429	-0.102218	0.456544	0.76489	0.516698	-0.688248	0.453268	2.43884	0.551051	0.0601906	0.577825	0.322807	0.55107	0.829149	-0.198457	-1.48206	0.0617864	-0.952319	-0.576301	-0.0969115	2.41158	0.0951646	-0.997626	-1.25926	-1.25392	-1.05055	-0.0601906	-0.254174
hsa-miR-4691-5p	5.3907	3.82863	2.29401	2.5949	0	0	0	0	0	0	0	0	0	0	0	0	3.12689	0	3.73367	0	0	4.0417	0	0	0	0	0	3.75252
hsa-miR-4694-3p	0	3.66527	0	0	0	3.17736	0	0	3.03423	2.90347	0	0	0	0	0	0	0	0	0	0	0	3.33841	0	0	0	0	0	3.38711
hsa-miR-4694-5p	0	0	0	0	0	0	0	0	2.74608	0	0	0	0	0	0	0	0	0	0	0	0	0	0	0	0	0	0	0
hsa-miR-4695-3p	-0.603028	0.371562	-0.187738	-0.0443297	0.218662	0.0443297	0.170024	-0.699968	1.21357	1.03588	0.964818	-1.03384	1.28222	1.26371	-4.42175	-0.965552	-0.345214	-0.307535	-3.03013	0.502573	-1.24297	-0.528076	-0.748031	1.61407	-1.24426	1.04589	0.394461	1.24564
hsa-miR-4695-5p	-1.65845	-1.27089	0.099115	0.0375307	-0.579646	-0.930948	0.120732	1.73562	0.107787	0.12771	0.492736	0.429077	0.314387	-0.0375307	0.0603141	-0.484239	0.160293	-1.27734	-0.241682	0.202891	2.23847	0.306439	-0.557735	-2.32172	-1.26951	-1.99072	-0.0444778	-0.0440137
hsa-miR-4697-3p	0	3.75338	0	0	0	0	0	4.21878	0	0	0	0	0	0	0	0	0	0	0	0	4.71708	3.45562	0	0	0	0	0	4.31688
hsa-miR-4697-5p	-0.145001	-0.260736	0.226234	0.620735	0.541467	1.15072	-0.000340641	2.01457	0.230945	-0.80516	-0.148414	0.502792	0.147149	-0.504114	-0.572872	-1.10728	-0.592516	-1.83426	1.22453	0.158107	1.10224	-0.696503	0.177733	0.000340641	-1.51744	-1.39265	-0.0154245	2.14378
hsa-miR-4698	0	0	0	0	0	3.85577	0	3.27161	3.72997	2.78069	3.50455	2.52044	3.0985	4.15976	0	3.62042	3.06984	0	0	0	3.82913	0	0	3.98956	0	0	0	4.8356
hsa-miR-4699-3p	0	0	0	2.83014	3.79224	0	0	0	0	0	0	0	0	0	0	0	0	0	0	0	0	0	0	0	0	0	0	0
hsa-miR-4700-3p	0	0	0	0	0	3.11062	0	3.49057	0	0	0	0	0	0	0	3.18425	3.70697	0	0	3.91369	3.86698	0	0	3.46908	0	0	0	3.75757
hsa-miR-4700-5p	0	0	0	0	0	0	2.6055	0	2.86813	0	0	2.26403	2.64462	0	0	3.4716	0	3.2602	0	0	0	0	3.69742	3.45741	0	0	0	3.55317
hsa-miR-4701-3p	3.30322	0	0	0	0	0	0	0	0	0	0	0	0	0	0	0	0	0	0	0	3.31022	0	0	0	0	0	3.43896	0
hsa-miR-4701-5p	0.540431	0.80911	-1.02288	-0.552348	-0.237295	1.40509	-0.565575	0.00116665	-0.0702586	-0.830909	-1.52799	-1.56624	-0.00116665	0.382977	-4.30102	0.432976	-0.171555	0.141306	-0.541938	0.18752	0.658357	0.55818	-0.410753	0.898439	-4.30102	0.791202	0.182208	1.24288
hsa-miR-4704-3p	3.35634	0	0	0	0	0	0	0	0	0	0	0	0	0	0	0	0	0	0	0	0	0	0	0	0	0	0	0
hsa-miR-4706	-1.37511	-0.701381	-0.0199966	-0.209823	-0.00493855	-0.632833	0.00493855	1.84822	0.278858	-0.0770481	0.324101	-0.370275	0.356817	0.605973	0.415492	-0.449523	0.142538	-1.16072	0.177632	0.136555	2.63232	0.937469	-0.302117	-1.26291	-1.08415	-1.3256	0.395971	0.076984
hsa-miR-4707-3p	1.11441	1.29366	-0.77048	0.327196	-0.324914	0.358877	-0.692861	-0.0535878	0.322259	-0.511119	0.0535878	-3.14517	-0.425754	-3.14517	-3.14517	-3.14517	1.02631	-3.14517	1.48738	0.678542	1.07162	-3.14517	0.381881	0.317733	-3.14517	-3.14517	1.12816	1.28922
hsa-miR-4707-5p	-0.925853	-0.989226	0.0767587	-0.00344999	-0.164975	-0.0653908	0.248148	1.81129	0.381844	0.160686	0.285748	0.240312	0.520045	0.47728	0.00344999	-0.816544	-0.204873	-0.940944	0.0363079	0.100953	2.05309	-0.510212	-0.405384	-1.35276	-1.28649	-1.82596	-0.0350414	0.474887
hsa-miR-4708-3p	-3.27941	-3.27941	0.102939	0.819953	0.0786848	-0.00571046	1.03795	1.53954	0.968357	0.720037	0.858155	0.736474	0.00571046	-3.27941	-0.179349	-3.27941	-3.27941	-3.27941	0.330692	0.6955	1.33452	-3.27941	-3.27941	-3.27941	-3.27941	-3.27941	-3.27941	0.381771
hsa-miR-4709-3p	0	0	0	0	3.34199	0	0	4.07334	0	0	0	0	0	0	0	0	0	0	0	0	3.259	3.82627	0	0	0	0	0	0
hsa-miR-4710	-4.09002	-4.09002	-0.713825	-0.774442	-0.0519546	0.0519546	-0.099241	1.23041	0.847218	0.354979	0.103682	0.355021	1.40916	1.22665	0.277005	-0.102519	-0.152398	-4.09002	-0.35882	0.202136	2.23711	0.0964052	-0.0645243	-4.09002	-1.06686	-4.09002	0.355041	0.343519
hsa-miR-4711-5p	0	0	0	0	0	0	0	0	0	0	0	0	0	0	0	0	0	0	0	0	0	0	0	0	0	0	3.3336	3.60748
hsa-miR-4712-5p	0	0	0	0	0	0	2.46491	0	0	0	0	0	0	0	0	0	0	0	0	0	0	0	0	0	0	0	0	0
hsa-miR-4713-3p	3.40491	3.7595	0	0	0	0	0	0	0	0	0	0	0	0	0	0	3.33642	0	3.83834	3.39211	3.93719	3.59791	2.88122	0	0	0	0	3.39482
hsa-miR-4714-3p	0	0	0	0	0	0	0	0	0	0	2.7504	0	0	0	0	0	0	0	0	0	0	0	0	0	0	0	0	0
hsa-miR-4714-5p	0	0	0	2.38872	3.61679	0	0	4.39802	4.67587	0	0	0	0	0	0	0	0	0	0	0	3.7294	3.76455	0	3.36735	0	0	0	3.96882
hsa-miR-4716-3p	0	0	2.15192	0	0	0	0	0	3.18062	3.78554	3.34284	3.1107	3.92253	3.83327	2.72491	3.61809	4.25157	0	0	0	3.40737	0	0	0	0	0	0	3.8423
hsa-miR-4716-5p	0.0633347	-0.480066	-4.23378	-1.78412	-0.011443	1.47784	-0.0790838	1.15433	0.196706	0.0224773	0.011443	-0.253265	0.066405	1.30431	-0.569997	0.628119	-0.631027	-0.662507	0.10609	-4.23378	1.50042	0.186771	-0.381173	1.32107	-4.23378	-0.417726	-1.07442	2.44594
hsa-miR-4717-3p	0	0	0	0	0	3.7938	0	3.12962	3.69087	3.20679	3.50998	3.18297	3.68116	4.32002	2.99643	0	0	0	0	3.554	4.06219	0	0	0	0	0	0	0
hsa-miR-4720-3p	0	0	0	0	3.02141	0	0	0	0	0	0	0	0	0	0	0	0	0	0	0	0	0	0	0	0	3.48086	0	0
hsa-miR-4721	-3.49034	0.441521	0.00906933	0.134727	0.542316	-0.0119377	0.713226	1.36407	-0.00906933	-3.49034	0.027224	-0.207597	-0.638627	-3.49034	-0.606343	0.0530185	0.084593	-3.49034	1.02962	0.113254	1.46263	1.16535	-0.0918027	-3.49034	-3.49034	-3.49034	-3.49034	0.590517
hsa-miR-4722-3p	0	0	0	0	0	2.61061	0	0	0	0	0	2.33063	0	0	0	0	0	0	0	0	0	0	0	3.76413	0	0	0	0
hsa-miR-4722-5p	-0.595767	-0.00614322	-0.722495	-0.352641	0.267712	0.193389	0.390256	1.00317	0.0870758	0.191491	0.349885	-0.426901	0.492338	-0.124371	-0.689015	-0.278176	0.441802	-4.50895	0.48002	0.00614322	1.70999	0.395101	-0.329652	-4.50895	-1.36681	-4.50895	-0.415187	0.367161
hsa-miR-4723-3p	0	0	0	0	3.06707	0	0	3.12552	2.45656	0	2.5579	0	0	3.86333	0	0	0	0	0	3.7544	3.48716	0	0	0	0	0	0	0
hsa-miR-4723-5p	-0.890257	0.0392079	-0.762494	-0.0392079	0.368754	0.542839	-0.214376	1.69068	0.407679	0.606454	0.329554	-1.54121	0.567195	1.40533	-1.47705	-1.04643	-0.674243	0.698135	-2.59264	-0.159362	1.03302	0.119168	-1.52595	-0.0439937	-2.01287	0.685204	-0.596554	0.633623
hsa-miR-4724-5p	0	0	0	0	4.44826	0	0	3.3729	0	0	0	0	0	0	0	0	3.14141	0	0	0	0	0	0	0	0	0	0	0
hsa-miR-4725-3p	-0.818751	-1.27841	0.0157671	0.334145	0.391714	-0.573086	1.11241	1.04973	0.637512	0.246588	1.39347	-0.409857	0.341427	1.37892	-0.366159	-1.4125	-0.0157671	-1.30372	0.766146	-0.537871	1.67706	1.40073	-0.570874	-1.467	-0.620261	-1.82574	-0.268839	0.607436
hsa-miR-4725-5p	0	3.68156	0	0	0	0	0	0	0	0	0	0	0	0	0	0	0	0	0	0	0	0	0	0	0	0	0	3.44959
hsa-miR-4726-3p	0	3.76457	2.96832	3.63382	4.74783	0	2.56639	3.54293	0	2.62684	3.43938	0	2.74564	0	0	0	3.40113	0	0	3.95074	0	0	2.95648	0	0	0	0	3.66118
hsa-miR-4726-5p	-4.42767	0.0456905	-1.88418	-0.838518	-0.27113	-0.305002	-0.0456905	0.830908	0.320529	0.58105	0.130855	-1.07327	0.451858	0.952407	-0.977379	-0.38728	0.49831	-0.83826	-0.156673	0.216162	1.25246	0.972467	-0.718781	0.210491	-4.42767	-0.998077	0.373244	0.837693
hsa-miR-4727-3p	0	0	0	0	0	0	0	3.81953	0	0	0	0	0	0	0	3.3354	0	0	0	0	3.27969	4.43862	0	0	0	0	0	3.83972
hsa-miR-4727-5p	0	0	0	0	0	0	0	0	0	0	2.51292	0	0	0	0	0	0	0	0	0	0	0	0	0	0	0	0	0
hsa-miR-4728-3p	0.817771	0.730405	-3.09126	-3.09126	-0.215556	1.75385	0.185557	0.302831	0.149454	-0.0825719	-0.111795	-0.229258	0.695632	1.27232	-3.09126	-3.09126	-3.09126	-3.09126	-3.09126	0.557021	0.888664	-3.09126	0.340036	0.585463	-3.09126	-3.09126	0.0825719	2.03859
hsa-miR-4728-5p	-0.186524	0.0602572	-0.720233	0.0451002	0.867209	-1.12673	-0.116043	1.20609	-0.0197565	-0.0731923	0.761472	-1.21643	0.729619	0.682033	-0.542308	-0.49972	0.870291	-4.46111	0.635352	-0.385929	2.39617	0.480578	0.0197565	-4.46111	-0.315018	-4.46111	0.507485	0.956048
hsa-miR-4729	0	4.14158	0	0	0	0	0	0	0	0	0	0	0	0	0	0	0	0	0	0	0	0	0	0	0	0	0	0
hsa-miR-4730	-0.576289	-1.57208	-0.573617	0.988497	1.20439	-0.537312	1.16591	0.103527	0.328521	-1.09401	0.608126	-0.19002	-0.320114	-1.75588	-2.80355	-0.103527	0.922964	-1.45966	2.47906	1.17616	0.545311	-1.23028	1.99868	1.06931	-0.423697	-2.18225	2.03308	2.86842
hsa-miR-4731-3p	0.656543	0.263295	-1.62612	-0.0819846	0.14081	1.22134	-0.224209	1.22181	0.0329229	-0.690832	-0.646692	-2.07848	0.00349699	1.35634	-0.493729	0.619385	-0.149864	-0.00349699	-4.333	-0.300885	1.88871	0.420601	-0.545651	0.985195	-4.333	-0.0632316	0.174974	2.72837
hsa-miR-4731-5p	-0.728148	0.472623	0.392806	0.666346	0.725979	0.10482	0.286896	1.1326	0.442772	0.00363603	0.448708	-0.0284421	0.206155	0.6607	-0.781635	-0.659018	-0.846896	-1.29431	-0.803836	-0.73774	0.983453	-0.00363603	-1.33102	-1.10257	-1.93572	-0.898305	-0.829728	0.0739302
hsa-miR-4732-5p	-0.572482	0.103077	-1.31414	-1.0276	0.208497	-4.34276	-0.138604	0.216198	-0.119263	0.0383784	-0.0613913	-0.96967	0.0981035	-0.0220106	0.0220106	0.837979	0.283726	-4.34276	-4.34276	0.610847	1.51771	1.58337	0.882235	-4.34276	0.471369	-4.34276	-0.799403	1.2523
hsa-miR-4734	-1.12829	-0.0372337	1.09548	1.06093	0.576814	-0.0891875	0.430037	1.92996	0.228252	-0.0452245	0.0987869	0.818666	0.46293	-0.196887	-0.734697	-1.00128	-0.21525	-1.49613	0.101483	0.0372337	1.65032	-0.0790945	-0.565336	-1.78895	-0.591168	-1.10646	0.751025	0.266903
hsa-miR-4735-3p	0	3.35834	0	0	0	0	0	0	0	0	0	0	0	0	0	0	0	0	0	0	3.74587	0	0	0	0	0	0	0
hsa-miR-4735-5p	0	0	0	0	0	0	0	0	0	0	0	0	0	3.09505	0	0	0	0	0	0	0	0	0	3.5644	0	0	0	0
hsa-miR-4736	-3.55838	0.140747	-3.55838	-0.909513	-3.55838	-3.55838	-0.105671	0.451256	0.75344	0.948288	0.105671	-3.55838	1.15647	-3.55838	-3.55838	0.533482	1.35223	-3.55838	0.792286	0.324549	0.990012	-3.55838	0.504307	-3.55838	-3.55838	-3.55838	0.167525	0.598249
hsa-miR-4737	0	0	0	0	0	0	0	0	0	0	0	0	0	0	0	0	3.01634	0	0	0	0	0	0	0	0	0	0	0
hsa-miR-4738-3p	-2.94846	1.21254	-2.94846	-0.264558	-2.94846	-2.94846	-0.302165	1.23186	-0.519441	-0.147514	-2.94846	-2.94846	0.547011	0.147514	-2.94846	1.13835	1.77793	-2.94846	1.21176	1.13022	2.74302	1.02527	1.09143	-2.94846	-2.94846	0.336183	0.438726	1.90712
hsa-miR-4739	0.173768	-0.44463	0.326401	0.244195	0.277037	2.3562	-0.0209319	0.426674	-0.531693	0.0209319	0.806696	1.00492	0.407071	0.192868	-0.780765	-0.915771	-0.234145	-2.06507	-0.435569	0.101001	1.18072	-1.04455	-0.557864	-1.38731	-0.892789	-1.77246	-0.141286	1.07746
hsa-miR-4740-5p	3.32792	3.63043	0	0	2.74129	0	0	3.86383	2.35139	0	0	0	2.7226	0	0	0	3.02735	0	3.8138	0	4.04865	3.32983	0	0	0	0	0	3.4479
hsa-miR-4741	-0.995526	-1.0032	-0.129036	0.00254562	-0.361488	-0.27326	0.554473	2.66121	0.500946	0.247251	0.786229	0.536346	0.532347	1.45782	-0.401202	-1.00799	-0.202418	-1.20937	0.190238	-0.00254562	2.02467	0.267715	-0.268047	-0.839647	-1.02541	-1.45457	0.0137258	0.639174
hsa-miR-4742-3p	0	3.87309	0	2.46838	0	0	0	0	0	0	0	0	0	0	0	0	0	0	0	0	0	0	0	0	0	0	0	0
hsa-miR-4743-5p	-3.26689	0.188215	-3.26689	-0.875076	-0.38151	-3.26689	0.13901	0.90041	0.14044	0.256283	0.433375	-0.651152	0.529029	0.336541	-0.40577	-0.0249184	1.03497	-3.26689	-3.26689	0.569584	1.87637	1.21898	0.0249184	-3.26689	-3.26689	-3.26689	-3.26689	0.0574452
hsa-miR-4745-3p	0	0	2.04075	0	0	0	0	0	0	0	0	0	0	0	0	0	3.44358	0	0	0	0	0	0	0	0	0	0	0
hsa-miR-4745-5p	-0.194912	-0.825232	-0.0943142	0.64953	0.588124	-0.239387	1.28769	0.637352	0.720373	-0.0162614	1.17501	0.446487	0.0162614	-0.32803	-1.05472	-1.23569	-0.338154	-1.99155	0.837078	0.0855221	1.127	-0.868176	1.02618	-0.25196	-0.691783	-2.23884	0.742877	1.03737
hsa-miR-4746-3p	-0.478771	-0.389673	-0.0534828	-0.17356	-0.528493	-0.537294	-0.496016	1.91409	0.105273	-0.146417	0.347452	-0.708891	0.433044	0.173769	0.0534828	-0.643512	0.109435	-0.767678	0.882539	0.274564	2.91417	0.340029	0.240919	-1.46188	-0.301386	-0.91221	0.498566	1.04291
hsa-miR-4746-5p	3.61996	0	0	0	0	0	2.8457	0	2.40535	0	2.69014	0	0	3.14486	0	0	0	0	0	0	0	0	0	0	0	0	0	0
hsa-miR-4747-3p	-0.702429	-1.29075	-0.892425	-0.00724538	-0.27793	0.0994721	-0.398434	-0.62	0.27158	0.161076	0.364494	-0.338365	0.400915	-1.57194	-1.09237	0.658377	1.72213	-4.85705	1.09898	1.27574	0.0144382	-1.28117	1.05686	-0.537465	0.00724538	-4.85705	1.41352	1.74818
hsa-miR-4747-5p	1.03846	-2.72913	-2.72913	-2.72913	-2.72913	-2.72913	-0.292166	0.730661	0.539048	0.735996	0.0161967	-2.72913	1.22253	-2.72913	-0.0161967	0.547464	0.844922	-2.72913	1.23007	0.788041	2.33449	1.8947	0.826366	-2.72913	-2.72913	-2.72913	-2.72913	0.97447
hsa-miR-4748	0	4.23299	2.51669	2.34503	3.77241	0	0	3.70054	3.23924	0	2.73737	0	3.84374	0	0	0	0	0	0	0	3.83751	4.69205	2.86481	0	0	0	3.11518	3.84407
hsa-miR-4749-3p	0.443284	0.626018	-0.149279	0.211752	0.577466	1.48958	-0.601893	0.991961	0.0118972	-0.52359	-0.51217	-0.880961	-0.0118972	0.0640012	-1.71415	-0.591648	-1.04356	-0.789644	-0.616717	-0.521677	0.599314	0.239928	-1.00481	0.0439703	-1.69121	0.0336397	0.146803	1.84227
hsa-miR-4749-5p	-0.653548	-0.200138	0.000449722	0.328666	0.229001	-0.542765	0.569775	1.61522	0.336525	-0.0137059	1.32116	-0.326129	0.0974143	0.787936	-0.381791	-1.11122	-0.389761	-0.926938	-0.000449722	0.133637	1.89035	0.985259	-0.623635	-1.12231	-0.656781	-0.535497	0.0848557	0.941186
hsa-miR-4750-3p	0.412401	-0.502132	-0.522764	-0.307849	-0.364596	2.40585	-0.00146699	0.399504	0.433305	0.0136589	0.480481	-0.421722	0.588522	1.01392	-1.40218	0.483859	-0.126508	-0.639344	-4.02667	-0.232938	0.884486	0.104139	-0.360658	0.651492	-4.02667	0.00146699	-0.124968	1.86911
hsa-miR-4750-5p	-1.37479	-0.396539	0.571547	-0.156606	0.108061	0.607279	0.594752	2.27724	0.132371	-0.146516	0.135293	0.951605	0.500746	0.185283	0.0266477	-1.1857	0.00488765	-1.70838	-0.641775	-0.17184	2.6398	-0.00488765	-0.782937	-2.33377	-1.16997	-0.954094	0.052581	-0.593358
hsa-miR-4751	3.52258	0	0	2.4752	4.39232	3.36265	0	4.25437	0	0	0	0	2.98262	3.19401	0	0	0	0	0	0	4.05266	4.16068	0	0	0	0	3.57874	0
hsa-miR-4753-5p	3.29132	0	0	0	0	0	0	0	0	2.74358	3.91459	0	0	0	0	0	4.59401	0	0	0	3.177	0	0	0	0	0	0	0
hsa-miR-4754	0	0	0	0	0	0	0	0	0	0	0	2.38139	0	0	0	0	0	0	0	0	0	0	0	0	0	0	0	0
hsa-miR-4755-3p	0	0	0	0	0	0	0	0	0	0	0	0	2.41971	0	0	0	0	0	3.64919	0	0	0	0	0	0	0	3.56859	0
hsa-miR-4756-5p	-3.86495	0.0502511	-0.856232	0.308589	-0.00693613	0.241891	0.518521	0.452687	-0.0735605	-0.174783	2.18762	-1.60093	0.335356	2.50281	-3.86495	-0.504079	0.00693613	0.117176	1.90254	-0.428749	0.794935	4.96641	-0.713586	-0.0216242	-3.86495	-3.86495	-0.0967631	2.56435
hsa-miR-4757-3p	0	0	0	0	0	0	0	0	0	0	0	0	0	3.67195	0	0	0	0	0	0	0	0	0	0	0	0	0	0
hsa-miR-4758-3p	-0.0761204	0.552545	-8.60109	0.149093	0.348948	-0.448404	-0.184573	-0.238306	0.439434	0.0761204	0.303544	-1.15854	0.52135	1.01996	-4.76492	-0.639227	-0.306704	-0.396898	-2.51235	0.57541	-1.39226	0.295863	-0.579118	2.18784	-1.07507	0.98101	0.592444	1.54959
hsa-miR-4758-5p	-0.555038	0.176613	0.510413	0.823629	0.695619	-0.0740246	0.116421	1.80918	0.239046	-0.303831	0.0134262	0.23674	-0.0134262	0.312216	-0.0723455	-1.70127	-1.06991	-1.40128	0.211703	-0.473726	1.50177	0.157177	-0.95729	-1.72161	-1.85498	-0.782515	-0.329505	0.304478
hsa-miR-4760-3p	0	0	0	0	0	0	0	0	0	0	0	0	0	0	0	0	0	0	3.67045	0	0	0	0	0	0	0	0	0
hsa-miR-4760-5p	0	0	0	0	0	0	0	0	0	0	0	0	0	0	0	0	0	0	3.55597	0	0	0	0	0	0	0	0	0
hsa-miR-4761-3p	-1.14653	2.75247	1.14653	2.30799	2.70307	1.96515	-1.14653	3.52927	2.18191	-1.14653	2.24858	-1.14653	2.01942	3.08441	-1.14653	-1.14653	-1.14653	-1.14653	-1.14653	-1.14653	2.76132	2.53904	-1.14653	-1.14653	-1.14653	2.51824	-1.14653	3.26077
hsa-miR-4761-5p	0	0	0	0	0	0	0	0	0	0	0	0	0	0	0	0	2.96465	0	0	0	0	0	0	0	0	0	0	0
hsa-miR-4762-3p	0	0	0	0	0	0	0	0	0	0	0	0	0	0	0	0	0	0	0	0	3.32749	0	0	0	0	0	0	0
hsa-miR-4762-5p	0	0	0	0	0	2.61354	0	0	0	0	0	0	0	0	0	0	0	0	0	0	0	0	0	3.4955	0	0	0	0
hsa-miR-4763-3p	-1.39128	-1.28058	0.322488	0.0700967	-0.151912	-0.473464	0.334745	2.05183	0.581509	0.350915	0.515941	0.497512	0.610708	0.813454	0.0918303	-0.771405	-0.381624	-1	-0.0865694	-0.0700967	1.9516	-0.511703	-0.60827	-1.14128	-1.44252	-1.30713	0.138373	0.409154
hsa-miR-4763-5p	0	4.02425	0	0	0	2.75443	0	0	0	0	0	0	2.79866	0	0	0	0	0	0	0	0	0	0	0	0	0	0	3.61249
hsa-miR-4764-5p	3.3578	0	0	0	0	0	0	0	0	0	0	0	0	0	0	0	0	0	0	0	0	0	0	0	0	0	0	0
hsa-miR-4766-3p	0	0	0	0	0	0	0	0	0	0	0	0	0	0	0	0	0	0	3.71122	0	0	0	0	0	0	0	0	0
hsa-miR-4766-5p	3.66273	0	0	0	0	0	0	0	0	0	0	0	0	0	0	0	0	0	0	0	0	0	0	0	0	0	0	0
hsa-miR-4767	-2.96737	0.64177	0.159704	0.394198	0.091225	-0.0460036	0.329936	0.0460036	-0.369657	-0.336901	-2.96737	-0.338275	0.26465	-2.96737	-2.96737	-2.96737	0.377884	-2.96737	0.882351	0.374784	-2.96737	1.16449	0.176535	-2.96737	-2.96737	-2.96737	0.654655	1.28868
hsa-miR-4769-3p	0.61387	0.957527	-2.76323	0.0342064	-2.76323	1.13641	-0.238121	-2.76323	0.702595	-0.0342064	1.31688	-2.76323	0.485767	0.76816	-2.76323	-2.76323	-2.76323	-2.76323	1.26335	0.818511	0.648452	-2.76323	0.155937	1.22061	-2.76323	-2.76323	-2.76323	2.13669
hsa-miR-4769-5p	0	0	0	0	0	0	0	0	0	0	0	0	0	0	0	0	0	0	0	0	3.07249	0	0	0	0	0	0	0
hsa-miR-4771	0	0	0	0	0	0	0	0	0	0	0	0	0	0	0	0	0	0	3.72303	0	0	0	0	0	0	0	0	0
hsa-miR-4772-3p	0	0	0	0	0	0	0	0	2.61039	0	0	0	0	0	0	0	0	0	0	0	0	0	0	0	0	0	0	0
hsa-miR-4773	0	0	0	0	0	0	0	0	0	2.84868	2.71417	0	0	3.14381	0	0	0	0	0	3.33564	0	0	0	0	0	0	3.54413	3.84447
hsa-miR-4776-5p	-3.45068	-3.45068	-0.612415	0.363803	0.516086	-0.448327	-0.00584816	0.00584816	0.836317	-0.198461	1.46148	0.443294	0.895409	-0.211519	-1.0741	-0.316669	0.821793	-3.45068	-3.45068	0.718758	1.6708	0.853711	0.37347	-3.45068	-3.45068	-0.124184	0.404793	0.737105
hsa-miR-4777-5p	0	0	0	0	0	2.70829	0	0	0	0	0	0	0	0	0	0	0	0	0	0	0	0	0	0	0	0	0	0
hsa-miR-4778-3p	0	0	0	0	0	0	0	0	0	0	0	0	0	0	0	0	0	0	0	0	0	0	0	3.52516	0	0	0	0
hsa-miR-4778-5p	0	0	0	2.39991	2.99843	2.71246	0	0	0	0	0	0	0	0	0	0	2.93301	0	0	0	3.31007	0	0	0	0	0	0	0
hsa-miR-4780	3.91764	0	0	0	3.67655	2.61281	0	3.1337	0	0	0	0	0	0	0	0	0	0	0	0	0	0	0	0	0	0	3.0995	3.50124
hsa-miR-4781-3p	0	0	0	0	2.86781	0	0	0	0	0	0	0	0	0	0	0	0	0	0	0	0	0	0	0	0	0	0	0
hsa-miR-4781-5p	0	0	0	0	0	0	0	0	0	0	0	0	0	0	0	0	0	0	0	0	3.23239	3.9265	0	0	0	0	0	0
hsa-miR-4783-3p	-0.0518665	0.361393	-0.137922	0.155278	0.486799	1.35245	0.0518665	2.13308	0.993773	-0.538345	0.221941	-0.26827	0.27323	0.264533	-0.409366	-0.363158	-0.378654	-1.12054	-0.835412	-0.151787	1.57214	0.0918071	-0.570289	0.370087	-4.53304	-0.290479	-0.138442	2.1704
hsa-miR-4783-5p	-0.592154	0.407537	0.0307651	0.310169	0.386783	0.741064	-0.383093	0.278504	0.391843	-0.0307651	-0.0308417	-1.20549	0.512307	0.487119	-5.12385	-0.206782	-0.622227	0.126759	-5.12385	0.0564001	-0.261643	-1.62975	-0.732237	0.217816	-1.91319	-0.530428	0.48434	1.07162
hsa-miR-4784	0	0	0	0	0	0	0	0	0	0	0	0	0	0	0	0	0	0	0	0	0	3.38251	2.9647	0	0	0	0	0
hsa-miR-4785	0	0	0	2.925	0	4.0876	0	0	2.78664	3.03547	3.36047	2.33355	2.43651	3.37235	0	0	0	0	4.0298	3.52033	0	0	0	0	0	0	4.04488	3.50338
hsa-miR-4786-3p	0	0	0	0	0	0	0	0	0	0	0	0	0	0	2.79444	0	0	0	0	0	3.70609	3.65139	0	0	0	0	0	0
hsa-miR-4786-5p	0.554178	0.134552	-0.786046	0.0889857	0.637393	0.33948	-0.373447	-4.09573	1.262	0.70996	0.794751	-0.011855	0.119255	-0.492723	-4.09573	0.011855	-0.389566	-0.89029	-4.09573	-0.664791	0.725927	0.261567	-0.0485175	-0.505657	-0.975718	-0.570651	0.847565	1.15447
hsa-miR-4787-3p	1.15951	0.523076	0.596003	0.671537	0.550782	1.62885	-0.0278781	-1.79997	0.179141	-0.219337	0.0907475	0.066	0.331493	-2.08806	-5.50051	-1.73037	-0.324055	-5.50051	1.45627	-0.170435	-2.00864	-1.35376	0.0278781	-0.96254	-0.770013	-2.28048	0.741997	0.761455
hsa-miR-4787-5p	-0.374309	-0.190951	0.321339	0.495119	0.114648	0.583395	0.0273103	0.919133	0.0457464	-0.0681544	-0.885475	-0.0273103	0.3714	-0.681244	-1.12216	0.193606	0.0674265	-1.3761	-0.257351	0.771936	1.24176	-0.940268	-0.0377415	-0.800776	-0.88252	-1.62948	0.719723	0.714981
hsa-miR-4788	-2.99262	0.504707	-0.726823	0.171509	0.429254	-2.99262	-0.429724	1.11589	0.243785	-0.171509	0.296904	-2.99262	0.185776	-2.99262	-2.99262	-2.99262	0.653423	-2.99262	1.76481	-2.99262	1.49341	1.25711	-2.99262	0.625825	-2.99262	-2.99262	1.19631	1.26246
hsa-miR-4789-5p	0	0	0	0	0	0	0	0	0	0	0	0	0	0	0	0	3.41738	0	0	0	0	0	0	0	0	0	0	0
hsa-miR-4790-3p	0	0	0	0	0	0	0	0	0	0	0	0	0	3.04235	0	0	0	0	0	0	0	0	0	0	0	0	0	0
hsa-miR-4790-5p	0	0	0	0	0	0	0	0	2.60963	0	0	0	0	0	0	0	0	0	0	0	0	0	0	0	0	0	0	0
hsa-miR-4791	0	0	0	0	0	0	0	0	0	0	0	0	0	3.04347	0	0	0	0	0	0	0	0	0	0	0	0	0	0
hsa-miR-4792	0.353588	-0.015729	0.235327	0.500348	1.66678	0.015729	1.68202	-4.41801	1.15858	-0.0521152	1.30477	0.111332	0.457977	-0.744625	-1.57408	-4.41801	-1.00487	-4.41801	-4.41801	0.401763	-4.41801	0.264891	-0.210677	-4.41801	-0.692038	-4.41801	0.444605	0.924787
hsa-miR-4793-3p	0	0	0	0	0	0	0	5.341	0	0	0	0	0	0	0	0	0	0	0	0	0	0	0	0	0	0	0	0
hsa-miR-4793-5p	3.48019	0	0	0	0	0	0	0	0	0	0	0	0	0	0	0	0	0	0	0	0	0	0	0	0	0	0	0
hsa-miR-4794	0	0	0	0	0	0	0	0	0	0	0	0	0	0	0	0	0	0	0	0	0	0	0	0	0	0	0	3.38345
hsa-miR-4795-3p	0	0	0	0	3.20806	0	0	0	0	0	0	0	0	0	0	0	0	0	0	0	0	0	0	0	0	0	0	3.84101
hsa-miR-4796-3p	5.02664	0	0	2.58827	0	0	0	0	0	0	0	0	0	0	0	0	0	0	0	0	0	0	0	0	0	0	0	0
hsa-miR-4796-5p	0	0	0	0	0	3.50445	0	0	0	0	0	0	0	0	0	0	0	0	0	0	0	3.47034	0	0	0	0	0	3.33169
hsa-miR-4797-5p	4.08238	0	0	0	0	0	0	0	0	2.70914	0	0	0	0	0	0	0	0	0	0	0	0	0	0	0	0	0	0
hsa-miR-4798-5p	0	0	0	0	0	0	0	0	0	0	0	0	0	0	0	0	0	0	3.89869	0	0	0	0	0	0	0	0	0
hsa-miR-4799-3p	3.36615	0	0	0	3.30294	0	0	3.43293	0	0	0	0	0	0	0	0	0	0	0	0	0	0	0	0	0	0	0	0
hsa-miR-4799-5p	0	0	0	0	0	0	0	0	0	0	0	0	0	3.19314	0	0	0	0	0	0	0	0	0	0	0	0	0	0
hsa-miR-4800-3p	0	4.09586	3.66341	3.78681	4.55007	0	3.53711	0	4.68277	3.57798	3.65381	0	3.51931	0	0	0	0	0	0	4.09498	3.54871	0	0	0	0	0	0	0
hsa-miR-4800-5p	-3.718	-3.718	-1.66337	-3.718	-3.718	-0.413416	-0.00578301	-0.414982	1.12592	1.38686	0.0530378	-1.27916	1.24272	0.260183	-0.766838	0.331109	0.820282	-3.718	0.116415	0.0203158	0.896489	0.00578301	0.677816	-3.718	-3.718	-3.718	0.528444	0.498679
hsa-miR-4803	0	0	0	0	3.35415	0	0	0	0	0	0	0	0	0	0	0	0	0	0	0	0	0	0	0	0	0	0	0
hsa-miR-4804-3p	0	0	0	0	0	0	0	3.09578	0	0	0	0	0	0	0	0	0	0	0	0	0	0	0	0	0	0	0	0
hsa-miR-483-3p	0	3.47412	0	0	0	0	0	0	0	0	0	0	0	0	0	0	0	0	0	0	3.72438	5.46127	0	0	0	0	0	3.50074
hsa-miR-483-5p	1.16693	-2.66522	-0.467712	-2.66522	0.467712	-2.66522	-2.66522	1.98266	0.62677	0.487637	-2.66522	-2.66522	0.807176	1.22906	0.917917	1.08543	1.61242	-2.66522	-2.66522	-2.66522	3.18538	1.55915	0.65132	-2.66522	-2.66522	-2.66522	0.610352	-2.66522
hsa-miR-484	-0.0319871	0.580118	-0.757551	0.295943	0.453196	0.21492	-0.0837605	-4.24691	0.107102	-0.564379	-1.30429	-1.14491	-0.0629744	-0.642933	-4.24691	0.189052	1.76478	-4.24691	0.6826	1.29094	0.109728	-0.0819238	0.50922	0.0319871	-0.546279	-4.24691	1.28122	0.734707
hsa-miR-485-5p	0	0	0	0	0	0	0	0	0	0	0	0	0	0	0	0	3.34525	0	0	3.95014	0	0	0	0	0	0	0	0
hsa-miR-486-3p	-1.08379	0.066934	-0.266487	0.096665	0.0326075	-1.80019	0.01824	2.44968	0.0285833	0.479757	-0.0620044	-0.937971	0.735126	1.14638	0.508069	0.786673	-0.262117	-0.78665	-0.137213	-0.355783	3.28484	0.858352	-1.0479	-1.73852	-1.39966	-0.323719	-0.01824	1.14792
hsa-miR-486-5p	-1.17468	-1.17468	-1.17468	-1.17468	-1.17468	1.74666	-1.17468	2.22281	-1.17468	-1.17468	1.38986	-1.17468	-1.17468	-1.17468	1.17468	2.38436	1.81338	-1.17468	3.28878	3.63736	2.97178	2.5322	-1.17468	2.9488	-1.17468	2.10272	2.54781	3.95269
hsa-miR-487a	0.363065	1.02745	-0.832784	-0.720451	0.227495	1.22595	-0.229888	-0.121519	-0.648912	-0.158311	-3.25114	-3.25114	-0.268504	0.67085	-3.25114	-3.25114	0.292709	0.121519	-3.25114	0.584719	1.31448	0.959706	-3.25114	1.55425	-3.25114	0.272391	0.342415	2.35626
hsa-miR-487b	-0.271493	0.356015	0.0040379	0.375382	0.680279	0.572777	0.425929	1.05233	0.681901	-0.104657	-0.0838699	-0.0040379	0.488965	0.835547	-2.66118	-1.13867	-0.903674	0.0768569	-3.26583	-0.0636822	0.331499	-0.315444	-1.44267	-0.15635	-2.34179	0.138534	-0.0997565	0.855332
hsa-miR-488-3p	0	0	0	0	0	0	0	0	0	0	0	0	0	0	0	0	0	0	0	0	3.78249	0	0	0	0	0	0	0
hsa-miR-488-5p	0	0	0	0	0	0	0	0	0	0	0	0	0	0	0	0	0	0	0	0	3.43157	0	0	0	0	0	0	3.32561
hsa-miR-489	3.50513	0	0	0	3.09992	0	0	0	0	0	0	0	0	0	0	0	0	0	3.51805	0	0	0	3.00376	0	0	0	4.22933	3.88814
hsa-miR-490-3p	0	0	0	2.69303	2.90854	0	0	0	0	0	0	0	0	0	0	0	0	0	0	3.64754	3.55875	0	0	0	0	0	0	4.00743
hsa-miR-490-5p	0	0	0	0	0	0	0	0	0	0	0	0	0	0	0	0	0	0	3.8582	0	3.32749	0	0	0	0	0	0	0
hsa-miR-491-3p	0	3.4459	0	0	0	0	0	0	2.40109	0	2.56443	0	0	0	0	0	2.96693	0	0	0	0	0	0	0	0	0	3.50663	4.11588
hsa-miR-491-5p	0.260605	0.609505	-1.28751	-0.224154	0.693826	0.0180288	-1.07599	2.03589	-0.120925	-0.281829	0.498624	-1.98308	-0.739429	1.13026	-1.31994	-0.0987722	0.322201	-0.4412	-0.740367	-0.0180288	1.72389	3.22809	-0.72031	1.0086	-0.863699	0.0830799	0.106328	2.50989
hsa-miR-492	0	0	0	0	0	0	0	0	0	0	3.31514	0	0	0	0	0	3.32029	0	0	3.8926	0	0	0	0	0	0	0	0
hsa-miR-493-3p	0	0	0	0	0	0	0	0	0	0	0	0	0	0	0	0	0	0	0	3.36414	0	0	0	0	0	0	3.37135	3.33112
hsa-miR-493-5p	3.83488	0	0	0	3.23411	0	0	0	0	0	0	0	0	0	0	0	0	0	0	0	3.28108	0	0	0	3.10673	0	4.35016	0
hsa-miR-494	0.63733	-0.708506	-0.602441	0.631788	1.5363	-1.64815	-0.366121	-0.656421	0.118084	0.192087	1.46206	-0.444791	-0.394531	0.0134563	-2.70166	-0.384129	0.738465	-0.0134563	1.29694	0.554244	0.406779	2.84148	-0.901613	-0.936939	-1.21213	-0.902068	0.0429112	2.27528
hsa-miR-495-3p	0	0	0	0	0	0	0	0	0	0	0	0	0	0	0	0	3.33932	0	0	0	3.55772	0	0	0	0	0	0	0
hsa-miR-495-5p	3.50915	0	0	0	0	0	0	0	0	0	0	0	0	0	0	0	0	0	3.61073	0	0	0	0	0	0	0	0	0
hsa-miR-497-5p	0.398328	-0.175207	0.632071	1.49825	1.74955	-0.0196832	0.678002	-5.92027	0.322479	-0.443082	-1.4013	0.0157972	0.0506338	-5.92027	-5.92027	-1.94489	2.32818	-1.76628	0.179762	1.00322	-2.04061	-5.92027	1.16867	1.21465	-1.50368	-5.92027	1.45934	-0.0157972
hsa-miR-498	0.0700125	1.63234	-0.648539	0.50719	1.65745	0.957432	-3.28247	1.94159	0.369045	-3.28247	-3.28247	-3.28247	-0.619137	-0.137903	-0.87261	-3.28247	0.393947	-3.28247	1.1117	0.141086	2.05645	0.553592	-0.0846406	-3.28247	-3.28247	-0.0700125	0.799365	1.03406
hsa-miR-4999-3p	0	0	0	0	0	0	0	0	0	0	0	0	0	0	0	0	0	0	0	0	0	0	0	0	0	0	0	3.44282
hsa-miR-4999-5p	0	3.40818	0	0	0	0	0	0	0	0	0	0	0	0	0	0	0	0	3.53589	0	0	0	0	0	0	0	0	0
hsa-miR-5001-5p	-0.691883	-0.934747	0.717596	0.669501	0.232389	-0.0184551	0.279598	1.9166	0.04527	-0.332513	-0.0941297	0.573043	0.0184551	-0.261232	-0.3484	-0.56069	-0.419624	-1.55266	0.299701	0.0579414	2.12654	0.252555	-0.375141	-1.06961	-1.18908	-1.73208	0.339386	0.80646
hsa-miR-5002-3p	3.38422	3.50861	0	0	3.07828	0	0	0	0	0	0	0	0	0	0	0	0	0	0	3.39987	0	3.56447	0	0	0	3.48094	0	0
hsa-miR-5003-3p	3.36786	0	0	0	0	0	0	0	0	0	0	0	0	0	0	0	0	0	0	0	0	0	0	0	0	0	0	0
hsa-miR-5003-5p	0	0	0	2.54511	2.90442	0	0	0	0	0	0	0	0	0	0	0	0	0	0	0	3.11916	0	2.88854	0	0	0	0	0
hsa-miR-5004-3p	0	0	0	0	0	3.9582	0	0	0	0	0	0	0	0	0	0	0	0	0	0	0	0	0	0	0	0	0	0
hsa-miR-5004-5p	0	0	0	0	3.18674	0	0	3.05516	0	0	0	0	0	0	0	0	0	0	0	0	3.97906	0	0	0	0	0	0	3.3913
hsa-miR-5006-5p	-2.82433	-2.82433	-2.82433	-0.367498	-2.82433	0.0162905	-2.82433	0.511588	1.25624	1.50194	2.23416	-0.314428	1.95098	2.22951	-0.143324	0.784411	1.70527	-0.0162905	0.810714	-2.82433	1.85827	3.73088	0.28398	-2.82433	-2.82433	-2.82433	-2.82433	1.84778
hsa-miR-5008-3p	0	0	0	0	0	2.87907	0	0	0	0	0	0	0	0	0	0	0	0	0	0	0	0	0	0	0	0	0	0
hsa-miR-5008-5p	-1.1635	-1.1635	-1.1635	1.5717	1.61495	-1.1635	-1.1635	2.32707	1.81493	-1.1635	1.36679	-1.1635	1.90618	-1.1635	1.1635	3.06565	1.7853	-1.1635	2.92137	-1.1635	3.02224	2.9801	2.38051	-1.1635	-1.1635	-1.1635	-1.1635	2.33713
hsa-miR-5009-3p	6.88775	0	0	0	3.55473	0	0	0	0	0	0	0	0	0	0	0	0	0	3.48543	0	0	0	0	0	0	0	0	0
hsa-miR-500a-3p	0	0	2.13896	0	0	0	0	0	0	0	0	0	0	0	0	0	3.45121	0	0	0	0	0	0	0	0	0	3.69424	0
hsa-miR-500b	0	0	0	0	0	0	0	0	0	0	0	0	0	0	0	0	0	0	3.47223	0	0	0	0	0	0	0	0	0
hsa-miR-501-3p	0	0	0	2.75747	2.69394	0	2.85419	0	0	0	0	2.3915	2.69707	0	0	0	0	0	3.81815	0	0	0	0	0	0	0	0	3.66073
hsa-miR-5010-3p	0	3.85408	0	0	4.2956	2.88402	0	4.30218	0	0	0	0	0	0	0	0	0	0	0	0	4.13438	3.32746	0	0	0	0	3.3349	0
hsa-miR-5010-5p	3.96145	-0.189614	-0.00763277	0.874689	0.779898	-0.425934	0.334199	0.939364	-0.740248	-0.736256	0.635487	0.249929	0.00763277	0.152254	-1.15406	-0.947814	-0.25996	-3.9583	0.454609	-0.069517	1.0488	1.5994	0.271385	-3.9583	-3.9583	-3.9583	-0.0785008	0.454218
hsa-miR-5011-3p	0	0	0	0	0	0	0	0	0	0	0	0	0	0	0	0	0	0	3.57503	0	0	0	0	0	0	0	0	0
hsa-miR-5011-5p	0	0	0	0	3.893	0	3.24282	3.86383	0	0	0	0	0	0	0	0	0	0	0	0	0	0	0	0	0	0	0	0
hsa-miR-502-3p	0	0	2.17507	3.14131	3.03626	0	0	0	2.65412	0	0	0	0	0	0	0	3.74617	0	0	0	3.22099	0	0	0	0	0	0	0
hsa-miR-502-5p	0	0	0	0	0	0	0	0	0	0	0	0	0	0	0	0	0	0	0	0	0	0	0	0	0	0	3.37548	0
hsa-miR-503-3p	0	0	0	0	2.7166	0	0	3.70329	0	0	0	0	0	0	2.57824	0	0	0	0	0	4.16101	3.91194	0	0	0	0	0	0
hsa-miR-503-5p	0	0	0	0	0	0	0	0	0	0	0	0	0	3.1917	0	0	0	0	0	0	3.57114	0	0	3.99483	0	0	0	0
hsa-miR-504	0	0	0	0	0	0	0	0	0	0	0	0	0	0	0	0	2.94961	0	0	0	0	0	0	0	0	0	0	0
hsa-miR-5047	0	0	0	2.47434	4.03324	0	0	3.24098	0	0	0	0	0	0	0	0	0	0	0	0	3.40109	0	0	0	0	0	0	0
hsa-miR-505-3p	3.64648	3.84599	0	2.54083	0	0	0	0	0	0	0	0	0	0	0	0	3.74986	0	0	3.85889	0	0	3.2778	0	0	0	3.40742	0
hsa-miR-505-5p	0.0359845	0.642182	-1.05407	-0.68389	-0.117779	0.69387	-0.0359845	0.789571	0.091605	0.446354	-0.20052	-4.17178	0.51411	1.25958	-4.17178	-0.602891	-0.619377	0.0892705	-4.17178	-0.820698	1.1441	0.293035	-4.17178	0.106147	-4.17178	0.198274	-0.472778	1.31539
hsa-miR-507	0	0	0	0	0	0	0	0	0	0	0	0	0	0	0	0	0	0	0	3.67341	0	3.50525	0	0	0	0	0	0
hsa-miR-508-3p	0	3.35928	0	0	0	4.15871	2.55629	0	0	0	0	0	0	3.04443	0	0	0	0	3.96979	0	0	0	0	3.61105	0	0	0	0
hsa-miR-508-5p	3.63009	0	0	0	3.70308	0	0	0	0	0	0	0	0	4.29898	0	0	3.46137	0	0	0	3.50244	5.74838	0	0	0	0	0	3.65533
hsa-miR-5087	0	0	0	0	0	0	0	0	0	0	0	0	0	0	0	0	0	0	0	0	0	0	0	0	0	0	3.11719	0
hsa-miR-5088	0	0	0	0	0	0	2.73372	0	3.60284	3.49147	3.44316	0	3.39251	3.3721	2.41982	0	0	0	0	3.68917	5.0984	4.33202	3.26331	0	0	0	3.37685	4.18786
hsa-miR-5089-3p	0	0	0	0	0	0	0	0	0	0	0	0	0	0	0	0	0	0	0	0	0	3.43022	0	0	0	0	0	0
hsa-miR-5089-5p	0	0	0	0	0	4.08868	0	0	0	0	0	2.45821	0	0	0	0	0	0	0	0	0	0	0	0	0	0	0	0
hsa-miR-509-3p	0	0	0	0	0	3.44815	0	0	2.64915	0	0	0	0	0	0	0	0	0	0	3.4005	0	0	0	0	0	0	0	3.96381
hsa-miR-509-5p	3.82062	0	0	0	0	0	0	0	0	0	0	0	0	0	0	0	3.38368	0	0	3.56629	0	0	0	0	0	0	0	3.60994
hsa-miR-5090	-1.0749	-0.81683	0.118837	0.669073	0.253298	-0.727682	0.754911	1.84414	0.379892	-0.261797	0.0690856	0.116192	-0.0690856	0.571174	0.220536	-1.61615	-1.231	-1.8573	0.304414	-0.404887	1.64835	0.292208	-1.15974	-1.37825	-1.87199	-1.27049	-0.182181	0.161865
hsa-miR-5091	0	0	0	0	0	0	0	0	0	0	0	0	0	0	0	0	0	0	0	0	0	0	0	3.38529	0	0	0	0
hsa-miR-5093	0	3.48411	0	0	0	0	0	0	0	0	0	0	0	3.14396	0	0	3.55805	0	0	0	3.29331	4.65	0	0	0	0	0	0
hsa-miR-5095	0.252481	0.234243	-1.50092	-0.545526	-0.561971	-0.552742	-0.285027	0.0149848	0.128185	0.276085	-0.437196	-1.13324	1.10124	-0.291783	-3.66286	0.693504	1.3525	-0.729795	-0.0149848	0.894406	0.740419	1.45201	0.165802	-0.0684174	-3.66286	-3.66286	0.540698	0.935395
hsa-miR-5096	-3.64848	0.927724	-1.00531	0.171754	-0.0340025	-3.64848	1.03892	-3.64848	1.2111	1.31454	0.0335384	-1.01441	2.14973	-0.364846	-3.64848	1.08361	1.5924	-3.64848	0.734062	1.26567	-0.0694843	-0.0335384	1.08699	-3.64848	-3.64848	-0.377484	0.597146	0.700908
hsa-miR-510	0	0	2.2454	0	0	0	0	0	0	0	0	0	0	0	0	0	0	0	0	0	0	0	0	0	0	0	0	0
hsa-miR-5100	-0.171882	0.775573	0.18227	0.5937	0.99863	0.513077	0.0435717	-0.291818	0.538572	0.0973413	-0.0435717	-1.23095	0.539516	-0.432753	-3.62391	-0.120511	-0.163488	-1.00628	-2.37977	0.491408	-0.182521	-0.487933	0.386843	0.525083	-1.10831	-0.555254	0.84118	1.07383
hsa-miR-511	3.33131	0	0	0	3.30268	3.50445	0	3.2679	0	0	0	0	0	0	0	0	0	0	3.77424	0	3.36532	0	0	0	0	0	4.01796	0
hsa-miR-512-3p	4.07776	4.04863	0	0	3.54954	0	0	0	0	0	0	0	0	0	0	0	0	0	0	0	0	0	0	0	0	0	0	3.50714
hsa-miR-512-5p	4.36086	0	0	0	3.18178	0	0	3.16822	0	0	0	0	0	0	0	0	3.51246	0	0	0	0	0	3.00803	0	0	0	3.3349	0
hsa-miR-513a-3p	3.35315	0	0	0	0	0	0	0	0	0	0	0	0	0	0	0	0	0	0	0	0	0	0	0	0	0	0	0
hsa-miR-513a-5p	3.85217	0	0	0	0	0	0	0	0	0	4.15622	0	0	0	0	0	0	0	6.69748	3.88201	3.20589	6.20186	0	0	0	0	0	3.60852
hsa-miR-513b	0	0	0	0	0	0	0	0	0	0	3.45052	0	0	0	0	0	0	0	0	0	0	4.26156	0	0	0	0	0	0
hsa-miR-514a-3p	0	0	0	0	0	0	0	0	0	0	2.45155	0	0	0	0	0	0	0	0	0	0	0	0	0	0	0	0	0
hsa-miR-514b-5p	-2.66884	1.41063	-2.66884	-2.66884	0.221353	0.0889626	0.438665	1.17377	0.751166	0.0336658	-0.0336658	-0.299056	1.10383	1.30934	-0.148327	0.781379	0.972237	-2.66884	-2.66884	-2.66884	2.43615	1.16175	-2.66884	-2.66884	-2.66884	-2.66884	-2.66884	1.76928
hsa-miR-515-5p	0	0	0	0	0	0	0	0	0	0	0	0	0	0	0	0	0	0	0	0	0	0	0	3.54816	0	0	0	0
hsa-miR-516a-5p	0	0	0	0	0	0	0	0	0	0	0	0	0	0	0	0	0	0	0	0	3.20736	0	0	0	0	0	0	0
hsa-miR-516b-5p	4.05057	0	0	0	0	0	0	0	0	0	0	0	0	0	0	0	0	0	0	0	0	4.01631	0	0	0	0	0	0
hsa-miR-517-5p	0	3.57087	0	0	0	0	0	0	0	0	0	0	0	0	0	0	0	0	0	0	0	0	2.89986	0	0	0	3.27398	3.55642
hsa-miR-517c-3p	0	0	0	0	0	0	2.52374	0	0	0	2.54284	0	0	0	0	0	0	0	0	0	0	0	0	0	0	0	3.87845	0
hsa-miR-5186	0	3.55983	0	0	0	0	0	0	0	0	0	0	0	0	0	0	0	0	0	0	0	0	0	0	0	0	0	0
hsa-miR-5187-5p	0	0	0	0	0	0	0	0	0	0	0	0	0	0	0	0	0	0	0	0	3.31159	0	0	0	0	0	0	0
hsa-miR-5188	6.97772	0	0	0	3.34148	0	0	3.05946	0	0	0	0	0	0	0	0	0	0	0	0	0	0	0	0	0	0	0	0
hsa-miR-5189	1.26993	-1.08186	-0.136066	-0.543385	-0.282077	-1.38187	0.0481365	1.81163	1.0587	-0.112401	0.0301846	-0.756619	0.0814742	0.0865803	-0.0445332	-0.480891	0.668709	-4.49197	0.129726	-0.0301846	2.77314	0.668659	0.0663696	-1.15757	-0.953936	-0.795709	0.797149	0.708172
hsa-miR-518a-3p	0	0	0	0	0	3.42276	0	0	2.45072	0	0	0	2.83621	3.41283	0	0	0	0	0	3.42758	3.32884	0	0	0	0	0	0	0
hsa-miR-518b	3.5768	3.65667	0	0	3.90729	3.50841	0	4.51531	0	0	0	0	0	0	0	0	2.9488	0	4.41482	0	4.00624	0	0	3.41238	0	0	0	0
hsa-miR-518c-3p	0	0	0	0	0	0	0	0	0	0	0	0	0	0	0	0	0	0	3.80049	0	0	0	0	0	2.95333	0	0	0
hsa-miR-518c-5p	0	0	0	0	0	3.58249	0	0	3.00186	3.08001	3.06307	0	3.57705	4.50366	0	3.98289	0	0	3.8633	3.72465	4.19005	0	0	4.27854	0	0	3.34402	4.40556
hsa-miR-518d-3p	0	0	0	0	0	0	2.36755	0	0	0	0	0	0	0	0	0	0	0	0	0	0	0	0	0	0	0	3.10001	0
hsa-miR-518e-3p	3.83631	0	0	0	0	0	0	0	0	0	0	0	0	0	0	0	0	0	0	0	3.42905	0	0	0	0	0	3.48442	0
hsa-miR-518f-3p	0	0	0	0	2.97608	0	0	3.24098	0	0	0	0	0	0	0	0	0	0	0	3.62234	0	0	0	0	0	0	3.63535	0
hsa-miR-5190	0	3.98249	0	0	4.35136	3.11064	0	4.20028	3.19502	0	0	0	3.33771	3.89384	0	0	0	0	0	0	4.26286	4.32195	0	0	0	4.154	0	3.70784
hsa-miR-5191	0	0	0	0	3.78605	0	0	3.59937	0	0	0	0	0	0	0	0	0	0	0	0	0	0	0	3.44937	0	0	3.4801	0
hsa-miR-5195-3p	-0.694568	-0.456409	-0.170663	-0.196187	-0.230706	0.0177541	0.0335277	0.675463	0.225117	-0.0929228	-0.322461	-0.416751	0.226226	0.384192	-0.0177541	-0.516492	0.548501	-1.07811	1.14513	0.537416	1.91159	-0.0190165	0.273212	0.263616	-1.57255	-1.25185	0.259496	1.44491
hsa-miR-5195-5p	0.156724	0.94972	-1.59436	-0.0278497	-0.898952	-0.349531	0.164695	1.7117	1.91289	2.70328	1.79575	-0.803653	2.15647	1.89702	-0.532256	1.29637	-0.278216	-0.400037	-0.991102	0.0278497	1.88801	2.02809	-0.307167	-0.961207	-1.60673	-1.3823	-0.890448	2.02858
hsa-miR-5196-5p	-0.246755	-0.679483	-0.230385	-0.0457761	-0.0292101	-4.18104	0.805013	2.23622	0.851472	0.357773	0.259006	-1.19935	0.908387	1.54951	1.57882	0.0292101	0.386513	-1.38683	0.129002	-0.581011	2.36887	0.806137	-0.194312	-4.18104	-4.18104	-4.18104	-0.100123	0.654065
hsa-miR-5197-3p	0	0	0	0	0	0	0	0	0	0	0	0	0	0	0	2.98194	0	0	0	0	0	3.3961	0	0	0	0	3.3592	0
hsa-miR-519d	0	0	0	0	0	0	0	0	0	0	0	0	0	0	0	0	0	0	0	0	0	0	0	3.81747	0	0	0	0
hsa-miR-519e-3p	0	0	0	0	0	0	0	0	0	0	0	0	0	0	0	0	0	0	0	0	0	0	0	0	0	0	3.27726	0
hsa-miR-519e-5p	0	0	0	0	0	0	0	0	0	0	2.55747	0	0	0	0	0	3.26777	0	0	0	0	0	0	0	0	0	4.31631	0
hsa-miR-520a-3p	0	0	0	0	0	0	0	0	0	0	0	0	0	0	0	0	0	0	3.99337	0	0	0	2.90956	0	0	0	0	0
hsa-miR-520a-5p	3.74241	0	0	0	0	0	0	0	0	0	0	0	0	0	0	0	0	0	0	0	0	0	0	0	0	0	0	0
hsa-miR-520b	0	0	0	0	2.98505	0	0	0	0	0	0	0	0	0	0	0	0	0	0	0	0	0	0	0	0	0	3.46873	0
hsa-miR-520c-3p	0	0	0	0	0	0	0	0	0	0	0	0	0	0	0	0	0	0	0	3.31775	0	0	0	3.48883	0	0	0	0
hsa-miR-520d-3p	0	0	0	0	0	0	0	0	0	0	0	0	0	0	0	0	0	0	0	0	0	0	0	3.51732	0	0	0	0
hsa-miR-520d-5p	3.53559	3.76468	0	0	0	0	0	4.58358	0	0	0	0	0	3.24043	0	3.15713	0	3.25279	0	0	4.44597	5.19936	0	5.08195	0	0	0	5.29655
hsa-miR-520e	0	3.49879	0	0	3.60994	4.0884	0	3.27161	0	0	0	0	0	0	0	0	0	0	0	0	3.56336	0	3.0115	0	0	0	3.27545	0
hsa-miR-520g	0	0	0	0	0	0	0	0	0	0	0	0	0	0	0	0	0	0	0	0	3.58396	0	0	0	0	5.35044	0	0
hsa-miR-520h	0	0	0	0	0	2.84315	0	0	2.37603	0	0	0	0	0	0	0	3.60871	0	0	3.38126	0	0	0	0	0	0	3.59164	0
hsa-miR-521	0	4.331	0	0	0	0	0	0	0	0	0	0	0	0	0	0	0	0	0	0	0	3.81599	0	0	0	0	0	0
hsa-miR-522-3p	0	0	0	0	0	0	0	0	0	0	0	0	0	0	0	0	0	0	0	3.34684	0	0	0	0	0	0	0	0
hsa-miR-523-3p	0	4.15878	0	0	0	0	0	0	0	0	0	0	0	0	0	0	0	0	0	0	0	0	0	0	0	0	0	0
hsa-miR-524-5p	0	0	0	0	0	0	0	0	0	0	0	0	0	0	0	0	0	0	0	0	0	0	0	4.28285	0	0	0	3.70828
hsa-miR-525-5p	0	0	0	0	0	0	0	0	0	0	0	0	0	0	0	0	0	0	3.99455	0	0	0	0	0	0	0	0	0
hsa-miR-526b-3p	0	0	0	0	0	0	0	0	0	0	0	0	0	0	0	0	0	0	4.00469	0	0	0	0	0	0	0	0	0
hsa-miR-532-3p	3.3902	3.82211	0	0	3.90068	0	2.38613	3.17219	0	0	0	0	2.81067	0	0	0	0	0	0	0	0	3.41272	0	0	0	0	0	3.92521
hsa-miR-532-5p	0	0	0	0	2.99653	0	0	0	2.54833	0	0	0	0	0	0	0	0	0	0	0	0	0	2.85316	0	0	0	0	3.38534
hsa-miR-542-5p	0	0	0	0	0	0	0	0	2.60222	2.60204	0	0	0	3.28445	0	0	3.43346	0	0	0	0	5.01728	0	0	0	0	0	3.60596
hsa-miR-543	0	0	0	0	0	0	0	0	0	0	0	0	0	0	0	0	0	0	3.6776	0	0	3.43369	0	0	0	0	0	0
hsa-miR-544a	0	0	0	0	0	0	0	0	0	0	0	0	0	0	0	0	0	0	0	0	0	3.3648	0	0	0	0	0	0
hsa-miR-544b	0	0	0	0	0	0	0	0	0	3.08898	0	0	0	0	0	0	0	0	0	0	0	0	0	0	0	0	0	0
hsa-miR-548a-3p	0	0	0	0	0	0	0	0	0	0	2.65195	0	0	0	0	0	2.96613	0	4.01266	3.30886	0	0	0	3.46332	0	0	0	0
hsa-miR-548ac	0	0	0	0	0	0	0	0	0	0	0	0	0	0	0	0	0	0	3.52887	0	0	0	0	0	0	0	0	0
hsa-miR-548ae	0	0	0	0	0	0	0	0	0	0	2.91384	0	0	0	0	0	0	0	0	0	0	0	0	0	0	0	0	0
hsa-miR-548ag	0	0	0	2.7717	3.84425	0	0	3.05085	0	0	0	0	0	0	0	0	0	0	3.63674	0	3.13667	0	0	0	0	0	3.12579	0
hsa-miR-548ah-5p	3.35437	3.62955	0	0	0	0	0	0	0	0	0	0	0	0	0	0	0	0	0	0	0	0	0	0	0	0	0	0
hsa-miR-548aj-3p	5.58111	0	0	0	0	0	0	0	0	0	0	0	0	0	0	0	0	0	0	0	0	0	0	0	0	0	0	0
hsa-miR-548al	0	0	0	0	0	0	0	0	0	0	0	0	0	0	0	0	0	3.27459	0	0	0	0	0	0	0	3.38231	0	0
hsa-miR-548aq-5p	0	0	0	0	3.2317	0	0	0	0	0	0	0	0	0	0	0	0	0	0	0	0	0	0	0	0	0	0	3.92886
hsa-miR-548ar-3p	0	0	0	0	0	0	2.40489	0	0	0	0	0	0	0	0	0	0	0	0	0	0	0	0	0	0	0	0	0
hsa-miR-548as-5p	0	0	0	0	0	0	0	0	0	0	0	0	0	3.45256	0	0	0	0	0	0	0	0	0	0	0	0	0	0
hsa-miR-548at-3p	0	0	0	0	0	0	0	0	0	0	0	0	0	0	0	0	0	0	0	3.34505	0	3.69192	0	0	0	0	0	0
hsa-miR-548at-5p	6.70487	0	0	0	2.68728	0	0	0	0	0	0	0	0	0	0	0	0	0	0	0	0	0	0	0	0	0	0	3.39118
hsa-miR-548av-3p	0	0	0	0	0	0	0	0	0	0	0	0	0	0	0	0	0	0	4.18535	0	0	0	0	0	0	0	3.73343	0
hsa-miR-548ax	0	0	0	0	0	0	0	0	0	0	0	0	0	0	0	0	0	0	0	0	0	0	0	0	0	0	0	3.75158
hsa-miR-548ay-3p	3.75852	0	0	0	4.04405	0	0	3.3625	0	0	0	0	0	0	0	0	0	0	0	0	0	3.66025	0	0	0	0	0	0
hsa-miR-548ay-5p	0	0	0	0	3.35045	0	0	3.57084	5.3424	0	0	0	0	0	0	0	0	0	0	0	0	0	0	0	0	0	0	0
hsa-miR-548az-5p	0	0	0	0	0	0	0	0	0	0	0	0	0	0	0	0	0	0	3.63982	0	0	0	0	0	0	0	0	0
hsa-miR-548b-3p	0	0	0	0	0	0	0	3.40088	2.52173	0	0	0	0	3.37133	0	0	0	0	0	0	0	0	0	0	0	0	0	0
hsa-miR-548c-3p	0	0	0	0	0	0	0	0	2.38037	0	0	0	0	0	0	0	0	0	0	0	0	0	0	0	0	0	0	0
hsa-miR-548d-3p	0	3.4573	0	0	0	0	0	0	0	0	0	0	0	0	0	0	0	0	0	0	0	0	0	0	0	0	0	0
hsa-miR-548e	0	0	0	2.57483	4.20182	3.24312	0	3.59937	0	0	0	0	0	0	0	0	0	0	0	0	0	0	0	0	0	0	0	0
hsa-miR-548g-3p	0	0	0	0	0	0	0	0	0	0	0	0	0	0	0	0	0	0	0	0	0	0	0	0	0	0	3.8128	0
hsa-miR-548h-5p	0	0	0	0	0	0	0	0	0	0	0	0	0	0	0	0	0	0	0	0	0	0	0	3.71414	0	0	0	0
hsa-miR-548i	0	0	0	0	0	0	0	0	0	0	0	0	0	0	0	0	0	0	0	0	0	0	0	0	0	0	3.28573	0
hsa-miR-548k	0	0	0	0	0	0	0	0	0	0	0	0	0	0	0	0	0	0	3.70881	0	0	0	0	0	0	0	0	0
hsa-miR-548l	3.62521	3.55561	0	0	3.35317	0	0	3.86873	0	0	0	0	0	0	0	0	3.36265	0	0	3.56669	0	0	0	0	0	0	0	0
hsa-miR-548q	0.0807605	-0.198204	0.803708	0.803426	0.869719	0.827731	0.0531583	2.77887	0.170896	-0.374592	-0.126612	0.232215	0.260613	0.784235	-0.322461	-1.31188	-0.702805	-4.64728	-0.0216516	-1.07946	1.54381	-0.31446	-0.0775784	-1.15267	-4.64728	-4.64728	0.0216516	1.10442
hsa-miR-548s	0	0	0	0	0	0	0	0	0	0	0	0	0	0	0	0	3.33818	0	0	0	0	0	0	0	0	0	0	0
hsa-miR-548w	0	0	0	0	0	0	0	0	0	0	0	0	0	3.32808	0	0	0	0	0	4.19036	0	0	0	0	0	0	0	0
hsa-miR-548y	0	0	0	0	0	0	0	0	0	0	0	0	0	0	0	0	0	0	0	0	3.10219	0	0	0	0	0	0	0
hsa-miR-549a	0	0	0	0	0	0	0	0	0	0	2.44915	0	0	0	0	0	0	0	0	0	0	0	0	0	0	0	0	0
hsa-miR-550a-3-5p	0	0	0	0	0	0	0	0	3.22001	0	3.36875	0	2.597	0	0	0	0	0	0	3.39945	0	0	0	0	0	0	3.16723	0
hsa-miR-550a-5p	-3.02081	1.42379	-3.02081	-0.222024	-0.0648592	-3.02081	0.848703	-3.02081	0.349324	-0.053243	1.22917	-0.030586	0.030586	-3.02081	-3.02081	-3.02081	0.49568	-3.02081	0.703032	1.11762	0.394703	0.982907	0.800977	-3.02081	0.887751	-3.02081	1.63807	1.13303
hsa-miR-550b-2-5p	0	0	0	0	0	0	0	0	0	0	2.73947	0	0	0	0	0	0	0	0	0	0	3.45938	0	0	0	0	0	0
hsa-miR-550b-3p	0	0	0	3.09257	4.72121	0	2.45162	0	0	0	0	0	0	0	0	0	0	0	3.94762	0	0	0	0	0	0	0	0	0
hsa-miR-551a	3.64109	0	0	0	0	0	0	3.12962	0	0	0	0	0	0	0	0	0	0	0	0	0	0	0	0	0	0	0	0
hsa-miR-551b-5p	0	0	0	0	0	0	0	0	2.70015	3.39758	0	0	3.35208	0	0	0	0	0	0	0	0	0	0	0	0	0	0	0
hsa-miR-552	0	0	0	0	0	0	0	0	0	0	0	0	0	0	0	0	0	0	3.51324	0	3.08644	0	0	0	0	0	0	0
hsa-miR-554	0	0	0	0	0	0	0	0	0	0	0	0	0	3.2858	0	0	0	0	0	3.67217	0	0	0	0	0	0	0	0
hsa-miR-557	-1.41475	-0.7727	-0.0927521	0.29418	0.91775	0.0927521	0.719991	0.633425	0.862465	-0.193484	0.56727	0.324318	0.278841	-0.726399	-1.35629	-1.634	-0.639642	-5.34042	0.679672	0.682041	0.40978	-0.822132	-0.80384	-0.757966	-5.34042	-5.34042	0.338988	0.2427
hsa-miR-5571-3p	4.01833	0	0	0	0	0	0	0	0	0	0	0	0	0	0	0	0	0	0	0	0	0	0	0	0	0	3.30722	0
hsa-miR-5571-5p	0	0	0	0	0	0	2.6525	3.9318	2.39415	0	0	0	0	3.28445	0	0	0	0	0	0	0	0	0	0	0	3.22567	0	3.83972
hsa-miR-5572	-0.727184	0.904613	-0.962155	-0.128222	-0.313087	-2.35542	-0.00985909	2.86597	0.00985909	0.625007	0.103462	-2.23651	0.59867	1.20386	1.43087	0.684919	-0.51123	-0.490803	-1.10377	0.063303	3.12123	0.685181	-0.503116	-0.752609	-1.54313	0.523996	-0.27811	1.15629
hsa-miR-5580-3p	0	0	0	0	0	0	0	0	0	0	0	0	0	0	0	0	0	0	0	0	0	0	0	0	0	0	3.66589	0
hsa-miR-5581-3p	5.78162	0	2.39458	0	3.05953	0	0	0	2.66631	0	0	0	2.6401	0	0	0	0	0	0	3.38604	0	0	0	0	0	0	4.05133	0
hsa-miR-5582-3p	0	0	0	0	0	0	3.24959	0	0	0	0	0	0	0	0	0	0	0	0	0	0	0	0	0	0	0	0	0
hsa-miR-5582-5p	0	0	0	0	2.97955	0	0	0	0	0	0	0	0	0	0	0	0	0	0	0	0	3.44329	0	0	0	0	0	0
hsa-miR-5584-5p	0	0	0	0	0	0	0	0	0	2.55842	0	0	0	3.19141	0	0	3.11356	0	0	0	0	0	0	0	0	0	0	0
hsa-miR-5585-3p	-0.78504	-0.231474	-4.09162	-0.954839	-1.11907	-4.09162	0.0225412	-0.0225412	0.638448	0.654904	0.131382	-0.774148	1.53666	-0.112601	-1.66782	1.89258	2.92482	-1.27885	0.933529	0.634147	1.43417	1.08848	1.07676	-4.09162	-1.15338	-4.09162	1.09945	0.964887
hsa-miR-5586-3p	0	0	0	0	0	0	0	0	0	0	0	0	0	0	0	0	0	0	0	0	0	0	0	0	0	3.32734	0	0
hsa-miR-5587-3p	0	0	0	0	0	4.25555	0	0	0	0	0	0	0	0	0	0	0	0	3.66961	0	0	0	0	0	0	0	3.12416	0
hsa-miR-5587-5p	0	0	0	2.47044	0	0	0	0	0	0	0	0	0	0	0	0	0	0	3.46942	0	0	0	2.97062	0	0	0	0	0
hsa-miR-5588-5p	0	0	0	0	0	0	0	0	0	0	0	0	0	0	0	0	0	0	0	0	0	0	0	0	0	0	0	4.0416
hsa-miR-5589-5p	0	3.84476	0	0	0	0	0	0	2.68684	0	3.11692	2.40293	2.93235	0	0	0	0	0	3.82275	3.36457	3.84857	0	0	0	0	0	0	0
hsa-miR-559	0	0	0	0	0	0	0	0	0	0	0	0	0	0	0	0	3.02333	0	0	0	0	0	0	0	0	0	0	0
hsa-miR-563	0	0	0	0	0	0	0	0	0	0	0	0	0	0	0	0	0	0	0	0	0	0	0	0	0	0	3.18799	0
hsa-miR-564	-0.515311	-0.470957	0.35824	0.445326	0.227197	-0.572837	0.621651	1.58907	0.235356	0.253451	1.28811	-3.84466	0.262182	-0.0730807	-0.63158	-0.587874	-0.0706561	-3.84466	-0.177534	0.15388	2.68193	2.24282	-3.84466	-3.84466	-0.464813	-3.84466	0.0706561	0.444338
hsa-miR-566	-3.93507	1.14262	-0.51632	-0.155323	-0.275441	0.920968	-0.426209	0.209791	0.319153	-0.0291351	-0.508549	-1.1072	0.401465	1.0662	-3.93507	0.0291351	0.20417	-0.41538	-3.93507	1.05993	0.511822	-0.149229	-0.573859	0.542361	-3.93507	0.186461	0.732055	1.6469
hsa-miR-567	4.21774	0	0	0	0	0	0	0	0	0	0	0	0	0	0	0	0	0	0	3.50061	0	0	0	0	0	0	0	0
hsa-miR-568	4.74211	0	0	0	0	0	0	0	0	0	0	0	0	0	0	0	0	0	4.31663	3.28926	0	0	0	0	0	0	0	0
hsa-miR-5683	0	0	0	0	0	0	0	3.05516	0	0	0	0	0	0	0	0	0	0	0	0	0	3.26889	0	0	0	0	0	0
hsa-miR-5684	3.92764	4.51473	2.94034	4.01139	5.30993	2.61058	0	0	4.3591	4.5214	4.47011	0	3.35611	0	0	0	3.27674	0	0	0	0	4.44777	0	0	0	0	0	4.59954
hsa-miR-5685	1.02862	0.832995	-2.63229	-2.63229	-2.63229	0.900848	0.199885	0.41856	0.454491	-2.63229	-2.63229	-0.160514	0.708844	1.73154	-2.63229	-2.63229	-2.63229	-2.63229	-2.63229	-2.63229	0.519423	-2.63229	0.160514	1.47913	-2.63229	0.945374	1.17331	2.26558
hsa-miR-5687	0	0	0	0	0	0	0	0	0	0	0	0	2.58319	0	0	0	0	0	0	0	0	0	0	3.35039	0	0	0	3.39185
hsa-miR-569	0	0	0	0	0	0	0	0	0	0	0	0	0	0	0	0	0	0	0	0	3.25135	0	0	0	0	0	3.25269	0
hsa-miR-5691	0	0	0	0	0	0	0	0	0	0	0	0	0	0	0	0	0	0	3.76447	0	0	0	0	0	0	0	0	0
hsa-miR-5692a	0	0	0	0	0	0	0	0	0	0	0	0	0	0	0	0	0	0	0	0	0	0	0	0	0	0	3.67597	0
hsa-miR-5692b	0	0	0	0	0	0	0	0	0	0	0	0	0	0	0	0	0	0	0	3.35575	0	0	0	0	0	3.7729	0	0
hsa-miR-5692c	0	0	0	0	0	0	0	0	0	0	0	0	0	0	0	0	0	0	0	0	0	0	0	0	0	0	0	3.26892
hsa-miR-5694	0	0	0	0	0	0	0	0	0	0	0	0	0	0	0	0	0	0	0	3.40546	3.40927	0	0	0	0	0	3.1031	0
hsa-miR-5695	0	3.64036	0	0	0	0	0	0	0	0	0	0	0	0	0	0	0	0	0	0	0	3.62241	0	0	0	0	0	0
hsa-miR-5696	3.39758	0	0	0	0	0	0	0	0	0	0	0	0	0	0	0	0	0	0	0	3.53322	0	0	0	0	0	0	4.15455
hsa-miR-5697	0	0	0	2.64638	2.6742	0	0	0	0	0	0	0	0	0	0	0	0	0	0	0	3.94152	0	0	0	0	0	3.67106	4.00628
hsa-miR-5698	-4.07021	0.0206936	-1.33216	-0.905849	-1.22411	0.291938	0.0925099	-0.0982699	0.464288	-0.526323	-0.380045	-0.65591	0.423177	0.526843	0.214117	-0.0206936	1.39578	-1.07238	0.471361	0.141258	1.62115	0.118859	-0.121115	-0.724442	-0.634919	-4.07021	0.0614136	0.369091
hsa-miR-5699	0	0	0	0	2.70251	0	0	0	0	0	0	0	0	0	0	0	0	0	0	0	0	0	0	0	0	0	0	0
hsa-miR-570-3p	0	0	0	0	0	0	0	0	0	0	0	0	0	0	0	0	0	0	0	0	3.07961	0	0	0	0	0	0	0
hsa-miR-5700	0	0	0	0	0	0	0	0	0	2.78697	0	0	0	0	0	0	0	0	0	3.40974	0	0	0	0	0	0	0	0
hsa-miR-5701	0	0	0	0	0	0	0	0	2.5568	3.04344	2.77698	0	0	3.04155	0	0	0	0	0	0	0	0	0	3.57764	0	0	0	0
hsa-miR-5702	0	3.95676	0	0	0	0	0	0	0	0	0	0	0	0	0	0	0	0	0	0	0	0	0	0	0	0	0	0
hsa-miR-5703	0	0	0	0	0	0	0	0	2.92049	0	0	0	0	0	0	0	0	0	0	0	0	3.70554	0	0	0	0	0	0
hsa-miR-5705	0	0	0	2.64648	0	0	0	3.27161	2.80807	0	0	0	2.97289	0	0	0	0	0	4.20038	3.78897	4.063	0	0	3.48412	0	0	3.28427	3.66017
hsa-miR-5708	0	0	0	0	0	0	0	0	0	0	0	0	0	0	0	0	0	0	0	0	0	3.54054	0	3.47656	0	0	0	0
hsa-miR-571	0	0	0	0	0	0	0	0	0	0	0	0	0	0	0	0	3.24823	0	4.36107	0	3.51113	0	0	0	0	0	0	3.39821
hsa-miR-572	-0.4441	-0.512465	-0.813761	-0.63127	-0.649674	1.73145	-0.0895101	0.218839	0.0895101	0.270975	-0.234219	0.322416	0.803302	-0.605692	0.447956	1.95041	0.441615	-1.07235	-1.07799	1.25937	2.58852	0.734527	0.585533	-0.137375	-1.45601	-1.33624	-0.636694	0.42691
hsa-miR-573	0	0	0	0	0	0	0	0	0	0	0	0	0	0	0	0	0	0	0	0	0	0	0	0	0	0	3.36186	0
hsa-miR-5739	-1.21672	-0.0905996	-0.791135	-0.27105	-0.162467	-0.248804	0.0856227	1.27533	0.310598	0.457326	0.171455	-0.73533	0.27078	1.58741	-1.48305	-0.528422	-0.283011	-0.0856227	-0.454135	0.747445	1.70171	0.148902	-1.4086	0.145196	-0.610553	0.647149	0.65321	0.66693
hsa-miR-574-3p	0.455537	0.978956	0.204083	0.0663447	0.942663	0.206968	0.702374	-3.91755	-0.0663447	-0.243515	-0.111464	-0.366199	-0.224491	-0.545585	-3.91755	0.0911978	0.924913	-3.91755	1.54594	0.677505	-3.91755	0.350212	0.101048	-3.91755	-3.91755	-3.91755	0.28762	-3.91755
hsa-miR-574-5p	0	0	0	0	0	3.27605	0	0	2.66494	0	0	0	0	0	0	0	0	0	0	0	0	3.5587	0	0	0	0	0	0
hsa-miR-575	-0.627005	-0.328206	-0.0992844	0.972112	0.550467	-0.884731	1.04999	-0.317194	0.717097	0.504764	2.08347	-0.231573	0.794972	-1.23989	-1.62341	-0.332883	0.0992844	-1.58274	0.886884	0.248711	0.456359	-0.233417	0.240223	-5.04321	-0.556287	-5.04321	0.297352	0.742517
hsa-miR-576-3p	0	0	0	0	0	0	0	0	0	0	0	0	0	0	0	0	0	0	0	0	3.09283	0	0	0	0	0	3.18437	3.55051
hsa-miR-5787	-0.619362	-0.612416	0.0390756	0.329313	0.296024	-0.81598	0.432257	0.758643	-0.0122726	-0.712439	0.442843	0.0122726	-0.458478	0.0350281	-0.367777	-1.35393	-0.764598	-1.27526	0.501122	0.0934265	1.30402	0.32066	-0.456062	-1.79935	-0.923527	-1.83974	0.164776	0.645184
hsa-miR-579	0	0	0	0	0	0	0	0	0	0	0	0	0	0	0	0	0	0	0	0	3.69337	0	0	0	0	0	0	0
hsa-miR-582-5p	3.55254	0	0	0	4.60986	0	2.93789	0	3.89991	0	0	0	0	0	0	0	4.06167	0	3.71544	3.45372	3.42173	0	0	0	0	0	3.27296	0
hsa-miR-583	3.75576	0	0	0	0	0	0	0	0	0	0	0	0	0	0	0	3.24721	0	0	3.4974	0	0	2.96833	3.78822	0	0	0	0
hsa-miR-584-5p	0	3.53793	0	0	3.46967	0	0	3.36944	0	0	0	0	0	0	0	0	0	0	0	0	3.64583	3.61731	0	0	0	0	3.50614	4.15312
hsa-miR-585	0	0	0	0	0	0	0	0	0	0	0	0	0	0	0	0	0	0	0	0	0	0	2.81426	3.34581	0	0	0	0
hsa-miR-586	0	0	0	0	0	0	0	0	0	0	0	0	0	0	0	0	0	0	3.49665	0	0	0	0	0	0	0	0	0
hsa-miR-587	0	0	0	0	0	0	0	0	0	0	0	0	0	0	0	0	0	0	0	0	0	0	0	0	0	0	3.41372	0
hsa-miR-588	0	0	0	0	0	2.65631	0	0	0	0	0	0	0	0	0	0	0	0	3.52055	0	0	0	0	0	0	0	0	0
hsa-miR-589-5p	0	0	0	0	0	0	0	0	0	0	0	0	0	0	0	0	0	0	0	0	0	3.40385	0	0	0	0	0	0
hsa-miR-590-5p	0	0	0	0	0	0	0	0	0	0	0	0	0	0	0	0	3.11345	0	0	0	0	0	0	0	0	0	0	0
hsa-miR-591	0	0	0	0	0	0	0	0	0	0	0	0	0	0	0	0	0	0	0	0	0	0	0	0	0	0	3.79098	0
hsa-miR-592	0	0	0	0	0	0	2.60547	0	0	0	0	0	0	0	0	0	3.10904	0	0	0	0	0	0	0	0	0	0	0
hsa-miR-593-3p	0	0	0	0	0	0	0	0	0	0	0	0	0	0	0	0	0	0	0	3.47142	0	0	0	0	0	0	0	0
hsa-miR-593-5p	0	0	0	0	0	0	0	0	0	0	3.40594	0	0	0	0	0	0	0	0	3.65026	0	0	0	0	0	0	3.51743	3.61051
hsa-miR-596	3.29519	0	0	0	0	0	0	0	0	0	0	0	0	0	0	0	0	0	4.00236	3.74053	0	3.41596	0	3.70027	0	0	0	0
hsa-miR-598	0	0	0	0	0	0	0	0	0	0	0	0	0	0	0	0	3.13336	0	0	3.35531	3.32749	0	0	0	0	0	0	0
hsa-miR-600	0	0	0	0	0	0	0	0	0	0	0	0	0	3.37171	0	0	0	0	0	0	0	0	0	0	0	0	0	0
hsa-miR-601	0	0	0	0	0	0	0	0	0	0	0	0	0	0	0	0	0	0	0	0	0	0	0	0	0	3.21629	0	0
hsa-miR-602	-0.805556	-0.371373	-0.316585	-0.143121	-0.900857	0.361388	0.0586556	1.01529	-0.134527	0.389735	0.493815	-0.0586556	0.296844	0.434614	-0.399811	1.2911	0.736891	-1.06067	-4.56629	1.00553	3.17467	-4.56629	0.704314	-0.180111	-0.0670461	-4.56629	0.563282	0.950346
hsa-miR-603	0	0	0	0	0	0	0	0	0	0	2.94543	0	2.50063	0	0	0	0	0	0	0	0	0	0	0	0	0	0	0
hsa-miR-604	0	0	0	0	0	0	0	0	0	0	0	0	0	0	0	0	2.98884	0	3.61685	0	0	0	0	0	0	0	0	0
hsa-miR-605	0	0	0	0	0	0	0	0	2.49388	2.53985	0	0	0	3.74021	0	3.48827	0	0	0	0	5.27646	0	0	0	0	0	3.3834	4.22498
hsa-miR-6068	-1.00147	0.158378	0.447784	0.219605	0.0421136	0.371802	0.0975751	0.970202	-0.206814	-0.0456895	0.0681892	0.428211	0.0989525	-0.672912	-0.0421136	0.831613	-0.0839914	-1.69477	0.369745	-0.130323	2.52563	0.720412	-0.0805019	-4.75817	-1.06994	-4.75817	-0.303416	-0.26491
hsa-miR-6069	-2.57353	-2.57353	0.0378638	0.85998	0.568936	1.3669	-2.57353	1.35736	0.152052	0.0622235	-2.57353	-2.57353	0.739141	-2.57353	-0.0378638	0.458772	-2.57353	-2.57353	1.20815	-2.57353	2.2758	0.753715	-2.57353	1.03579	-2.57353	-2.57353	-2.57353	2.28205
hsa-miR-607	0	0	0	0	0	0	0	0	0	0	0	0	0	0	0	0	0	0	0	3.32547	0	3.4003	0	0	0	0	0	0
hsa-miR-6070	0	0	0	0	0	0	0	0	0	0	0	0	0	0	0	0	0	0	0	3.48914	0	0	0	0	0	0	0	0
hsa-miR-6071	0	0	0	0	0	0	0	3.20581	0	0	0	0	0	0	0	0	0	0	0	0	0	3.89408	0	0	0	0	0	4.2214
hsa-miR-6073	2.38754	2.7228	1.34098	2.30969	2.65386	1.45423	-1.34098	1.67239	1.35076	1.45394	2.47262	-1.34098	2.61697	-1.34098	-1.34098	-1.34098	-1.34098	-1.34098	-1.34098	-1.34098	-1.34098	1.95341	-1.34098	-1.34098	1.71171	-1.34098	-1.34098	2.31627
hsa-miR-6074	3.33758	0	0	0	3.25205	0	0	3.60232	0	0	0	0	0	0	0	0	0	0	0	0	3.21747	0	0	0	0	3.38142	0	0
hsa-miR-6075	-0.836297	-0.077569	0.797473	0.959788	0.903542	-0.452256	0.2234	1.15839	0.242638	-0.06371	0.799864	0.282055	0.06371	-0.311044	-0.846508	-0.468113	-0.308202	-0.941513	0.249216	-0.308867	2.09925	4.10504	-0.493142	-2.60789	-0.938507	-2.21202	0.207641	0.309215
hsa-miR-6076	-3.639	0.36765	0.224238	0.752219	1.61768	0.0667337	0.57984	0.356835	0.270864	-0.204704	1.95628	-0.73266	0.0263422	1.72006	-3.639	-3.639	-0.391797	-3.639	-0.0263422	-0.254266	0.949738	3.73439	-3.639	-3.639	-3.639	-3.639	-3.639	1.74922
hsa-miR-6077	0	0	0	0	0	3.14518	0	0	2.75608	3.8299	2.46285	0	2.92419	3.32887	0	0	0	0	0	3.75204	3.17097	0	0	0	0	0	3.69083	4.28391
hsa-miR-608	0	3.79563	0	0	0	0	0	0	0	0	0	0	0	0	3.07297	0	0	0	0	0	4.6101	0	0	0	0	0	0	0
hsa-miR-6081	0	4.30987	0	0	0	0	2.95009	0	0	4.04367	4.55619	0	2.89823	3.04235	0	0	0	0	4.60189	0	0	0	0	0	0	0	3.2839	0
hsa-miR-6083	0	0	0	0	0	0	2.47446	4.03292	0	0	2.82199	0	0	0	0	0	0	0	0	0	0	0	0	0	0	0	0	0
hsa-miR-6084	0	0	0	0	0	0	0	0	2.76882	0	0	0	0	0	0	0	0	0	0	0	0	0	0	0	0	0	0	0
hsa-miR-6085	-0.800558	0.279322	-1.00672	-0.266298	-0.531028	-0.667354	-0.295323	1.54667	0.189796	0.430683	-0.161239	-1.46265	0.535747	0.551084	-0.0413977	0.0413977	0.155213	-0.19303	-0.391248	0.446704	2.09768	0.137256	-0.415898	-0.135708	-1.30802	0.193848	0.310417	0.907274
hsa-miR-6086	-2.59863	-2.59863	-2.59863	-0.179005	-2.59863	-2.59863	1.27007	2.36866	1.04381	0.831672	0.179005	-2.59863	1.53582	1.84648	0.516901	0.483733	0.963544	-2.59863	1.16024	-2.59863	3.09927	2.18356	0.6126	-2.59863	-2.59863	-2.59863	-2.59863	-2.59863
hsa-miR-6087	-0.715669	-0.60253	0.203788	0.097672	0.217826	0.000678102	0.129144	1.35022	-0.000678102	-0.40458	0.265253	-0.111639	0.0704884	0.0496041	-0.38081	-1.41418	-0.474717	-1.72066	0.405964	0.0649743	1.11257	0.162413	-0.637038	-1.51672	-1.14691	-1.57975	-0.0696543	0.080424
hsa-miR-6088	-0.597477	0.314697	0.0142894	0.393589	0.743071	-0.0596818	0.65193	1.7363	0.0624499	-0.238088	0.480761	0.0440744	-0.122653	0.346003	-0.95837	-1.89542	-0.745141	-1.55733	0.546436	-0.0142894	1.33009	0.463354	-0.862172	-0.721995	-1.13289	-1.19538	-0.641956	0.225793
hsa-miR-6089	-0.740414	0.00999432	0.480771	0.73204	0.372661	-0.122129	0.168519	1.74556	0.375026	0.0683462	0.17194	-0.101271	0.265139	0.220298	-0.615798	-1.27681	-0.828018	-1.3763	-1.15963	-0.00999432	1.05928	-0.2895	-0.736105	-1.1352	-1.10843	-0.293738	0.478367	0.364755
hsa-miR-6090	-0.342121	-0.137185	0.329883	0.541169	0.28296	0.249433	0.188956	2.03255	0.0868248	-0.302705	0.00880995	0.0626912	0.211502	0.29851	-0.00880995	-0.58428	-0.621378	-1.24229	-0.0718706	-0.0784341	1.56661	-0.150495	-0.479512	-0.925992	-1.24244	-0.571006	0.349631	0.697518
hsa-miR-610	0	0	0	0	0	0	0	0	0	0	0	0	0	0	0	0	0	0	0	0	0	0	0	0	0	0	3.15656	0
hsa-miR-612	-0.0854367	0.0372546	0.00359915	0.898211	1.50285	-0.212845	1.48604	1.61664	-0.0508223	-0.994934	1.67249	-0.18808	-0.00359915	-0.435714	-1.04841	-0.104314	-0.0111077	-1.38329	1.8199	-0.21841	1.34798	0.0444708	1.34532	0.264431	-1.07587	-4.20768	1.50969	2.9168
hsa-miR-6124	-1.52366	0.0415222	-1.03912	0.00531564	0.649031	-1.31982	0.168846	1.68328	0.329612	-0.116622	0.662333	-1.21837	0.415867	1.39876	0.0803363	-1.17168	0.290347	-1.30556	-0.00531564	-0.335348	1.89045	2.04738	-0.831223	-5.04575	-1.52435	-0.43352	-0.414967	0.33002
hsa-miR-6125	-0.906531	-0.165278	0.794637	0.746175	0.241956	-0.0267909	0.288295	1.55304	0.151419	-0.142208	0.144278	0.675431	0.294561	-0.508794	-0.778081	-0.40345	-0.114529	-1.39916	0.0267909	0.760562	1.35369	-0.119764	-0.175591	-1.58646	-0.412256	-1.1437	1.02659	0.526114
hsa-miR-6126	0.143986	-0.480039	-0.0216245	0.21286	0.384823	-0.183142	0.489029	0.730819	0.559658	0.230086	1.77014	-0.246022	0.0216245	0.586361	-2.33474	-1.65267	-1.04321	-2.7443	0.470045	-0.989518	0.0887252	1.81316	-0.761402	-0.497443	-0.914976	-2.83949	-0.628123	1.73991
hsa-miR-6127	-3.20535	-3.20535	-1.07402	-0.737234	0.166749	-3.20535	0.201934	1.5545	0.28843	0.899707	-0.070292	-0.438726	1.0874	1.42657	0.186506	0.070292	0.740569	-3.20535	-3.20535	0.402896	2.16891	0.932909	0.0941704	-3.20535	-3.20535	-3.20535	-3.20535	-3.20535
hsa-miR-6128	0	0	0	0	0	0	0	0	0	0	0	0	0	0	0	0	0	0	0	0	0	3.48408	0	0	0	0	0	0
hsa-miR-6129	0	0	0	0	0	0	0	0	0	0	0	0	0	0	0	0	0	0	0	0	0	4.21167	0	0	0	0	0	0
hsa-miR-613	0	0	0	0	0	0	0	0	0	0	0	0	0	0	0	0	0	0	0	0	0	0	0	0	0	0	0	4.11548
hsa-miR-6130	0	0	0	0	0	0	0	0	0	0	0	0	0	0	0	0	2.95326	0	0	0	3.56106	0	0	0	0	0	0	0
hsa-miR-6131	0.0546195	0.985475	1.28294	0.985485	1.02764	-0.950608	-0.0380107	-0.297031	0.355118	1.61731	1.43582	0.0839657	1.80427	-1.09642	-2.69194	-5.58092	0.0380107	-2.24749	1.55119	-0.120064	-0.374201	0.825441	-2.55055	-5.58092	0.594882	-5.58092	-0.778783	-1.6945
hsa-miR-6132	-1.6251	-0.323711	-0.185081	0.408433	0.763912	-3.08163	0.197706	0.716642	0.335221	0.0283404	0.859916	-0.508191	-0.341337	0.396615	-0.381762	-1.02463	0.741197	-0.989869	0.880776	0.688678	1.14871	3.30179	-0.247548	-6.08224	-0.930185	-1.55861	0.421771	-0.0283404
hsa-miR-6133	0	0	0	0	0	0	0	3.01951	0	0	0	0	0	0	0	0	0	0	0	0	0	4.05935	0	0	0	0	0	0
hsa-miR-614	0.373906	0.815076	-0.759802	0.00835505	0.452896	-3.37328	0.898676	0.70006	-0.00835505	-3.37328	0.437041	-3.37328	-0.518665	-3.37328	-3.37328	-3.37328	0.385565	-3.37328	2.91731	0.932375	0.865773	0.830273	-0.264363	-3.37328	-0.0400092	-3.37328	1.42526	0.91383
hsa-miR-615-3p	0	0	0	0	2.94108	0	0	3.01509	0	0	0	0	0	0	0	0	0	0	3.56283	3.73729	0	4.33111	0	0	0	0	0	0
hsa-miR-615-5p	0.832629	-3.71294	-0.832012	0.0764796	0.72251	-0.870387	0.141146	0.621085	-0.343644	-0.732869	-0.0780204	-0.808552	-0.219392	-0.301478	0.0315766	-0.0315766	-0.0979225	-3.71294	0.687308	-3.71294	1.1606	1.32893	0.514571	0.0682674	0.304485	-0.27933	1.32842	0.635205
hsa-miR-616-3p	0	0	0	0	0	0	0	0	0	0	0	0	0	0	0	0	0	0	0	0	0	3.73698	0	0	0	0	0	0
hsa-miR-616-5p	0	0	2.10487	0	0	0	0	0	0	0	0	0	0	0	0	0	0	0	3.72654	0	0	0	0	0	0	0	0	0
hsa-miR-6165	-4.70354	-0.27467	-0.867755	-0.956777	0.100672	-0.0982042	0.0165602	1.98295	-0.0165602	0.474061	0.425388	-1.06343	0.240762	1.1216	0.468443	-0.37563	0.110688	-0.44082	-0.0705964	0.139529	2.5282	2.65817	-0.33557	-0.847953	-1.70777	0.38504	-0.340139	0.623794
hsa-miR-617	0	0	0	0	0	2.70552	0	0	0	0	0	0	0	3.53094	0	0	0	0	0	0	0	0	0	0	0	0	0	0
hsa-miR-618	0	0	0	0	0	0	2.72238	0	0	0	0	0	0	0	0	0	0	0	0	0	0	0	0	0	0	0	0	0
hsa-miR-622	0	0	0	0	0	0	0	0	0	0	0	0	0	0	0	0	0	0	0	0	0	0	0	0	0	0	0	3.3341
hsa-miR-623	0	0	0	0	0	0	0	0	0	0	0	0	0	0	0	0	0	0	0	0	0	3.58216	0	0	0	0	0	0
hsa-miR-624-3p	0	0	0	0	0	0	0	0	0	0	3.07854	0	0	0	0	0	3.17091	0	0	3.49619	0	0	0	0	0	0	0	0
hsa-miR-625-3p	0.231569	-0.0013495	-1.1605	-0.953179	-0.0757251	1.68818	-0.0805018	1.12609	0.246002	-0.0472806	0.418843	-0.460906	0.204394	1.15415	-0.721058	0.123873	-0.277581	-0.375411	-0.134643	-0.322218	1.51735	0.0013495	0.0655506	0.676685	-4.61622	-0.459269	0.186381	2.287
hsa-miR-625-5p	0	0	0	0	0	0	0	0	0	0	0	0	0	0	0	0	0	0	0	0	0	0	0	0	0	0	3.39659	0
hsa-miR-628-3p	0	0	0	0	0	0	0	0	0	0	0	0	0	0	0	0	0	0	0	0	0	3.29213	0	0	0	0	3.12475	0
hsa-miR-628-5p	3.36891	0	0	0	0	2.88156	0	0	0	2.8135	2.77405	0	0	3.09351	0	0	0	0	3.74153	0	0	0	0	0	0	0	0	3.38832
hsa-miR-629-3p	0	0	2.15944	0	3.84462	2.92013	0	0	0	0	0	0	0	0	0	0	0	0	3.78921	3.30427	0	0	0	0	0	0	3.35587	3.50562
hsa-miR-629-5p	0	0	0	2.49823	0	3.17736	0	0	0	0	3.30462	0	2.67222	3.53048	0	0	3.16144	0	0	0	0	0	3.05451	3.69234	0	0	0	3.55475
hsa-miR-630	0	0	0	0	0	0	0	0	0	0	0	0	0	0	0	0	0	0	3.61981	0	3.09283	0	0	0	0	0	0	0
hsa-miR-631	0	0	0	0	0	0	0	0	0	0	0	0	0	0	0	0	4.30491	0	0	0	0	0	0	0	0	0	0	0
hsa-miR-632	0	0	0	0	0	0	0	0	0	0	0	0	0	0	0	0	0	0	0	3.87321	0	0	0	0	0	0	0	0
hsa-miR-634	-2.88038	0.731367	-2.88038	-2.88038	0.468526	0.955989	-0.429619	0.962228	-0.0632644	-2.88038	-2.88038	-2.88038	-0.128511	0.724244	-2.88038	-2.88038	0.305199	0.518321	1.11991	0.949084	2.0197	1.07684	0.0632644	1.71319	-2.88038	-2.88038	-2.88038	2.03851
hsa-miR-635	0	0	0	0	0	0	0	0	0	0	0	0	0	0	0	0	0	0	0	0	0	3.24463	0	0	0	0	0	0
hsa-miR-636	3.66128	0	0	0	0	0	0	0	0	0	0	0	0	3.32834	0	0	0	0	0	3.78668	3.16733	0	0	0	0	0	0	0
hsa-miR-637	0.281117	0.696545	-3.0375	-3.0375	-0.00186789	-3.0375	0.00186789	1.1448	-3.0375	0.280454	-0.562223	-3.0375	0.105802	0.290983	0.847596	-0.0548622	0.0856481	-3.0375	0.996673	0.403102	1.92084	0.702228	0.00621944	-3.0375	-3.0375	-3.0375	-3.0375	-3.0375
hsa-miR-638	-0.723466	-0.331133	0.118374	0.082603	-0.210866	0.395813	0.137889	1.07888	0.00828306	-0.304129	-0.123527	0.145508	0.33124	-0.317448	-0.565152	-0.0690327	0.0801785	-1.34544	0.284409	0.523612	1.3654	-0.53689	-0.00828306	-1.31504	-0.796365	-1.51412	0.51656	0.483831
hsa-miR-639	0	0	0	2.46088	0	0	0	0	0	0	0	0	0	0	0	0	0	0	0	0	0	3.70031	0	0	0	0	0	0
hsa-miR-640	0	0	0	0	0	0	0	0	0	0	0	0	0	0	0	0	0	0	0	0	0	0	0	3.3323	0	0	0	0
hsa-miR-641	0	3.3618	0	0	0	0	0	0	0	0	0	0	0	0	0	0	3.27519	0	3.52273	0	0	3.43637	0	0	0	0	0	3.26773
hsa-miR-642a-3p	0.336704	-0.0267282	-0.865521	0.0777915	1.12546	0.130309	1.62192	-0.0641415	0.0251786	-0.645585	1.88872	-0.969376	-0.0372187	1.30868	-2.08151	-0.887426	-0.435346	-1.31552	0.134101	0.284932	0.878288	2.45263	-0.790548	-0.0251786	-0.633598	-0.318516	0.399912	2.52893
hsa-miR-642a-5p	0	0	0	0	3.80749	0	0	3.49057	0	0	0	0	0	0	0	0	3.19228	0	4.07078	0	0	0	0	0	0	4.15248	3.63251	0
hsa-miR-642b-3p	0.0637743	-0.327146	-0.963242	0.11256	0.64183	0.0457267	0.574045	1.24939	-0.0490441	-0.0457267	1.25861	-0.654401	-0.173755	0.121543	-0.134563	-0.685649	-0.381296	-1.76925	0.916307	0.101472	1.57327	1.65853	-0.196354	-0.773577	-0.363088	-1.17798	0.440441	2.54134
hsa-miR-642b-5p	0	0	0	0	2.78021	0	0	0	0	0	0	0	0	0	0	0	0	0	0	0	0	0	0	0	0	0	0	0
hsa-miR-643	4.61204	0	0	0	3.08664	0	0	3.54906	0	0	0	0	0	0	0	0	0	0	3.63235	0	0	0	0	3.4916	0	0	0	3.96853
hsa-miR-644a	0	3.36007	0	0	4.1316	0	0	3.48739	0	0	0	0	0	0	0	0	0	0	0	0	3.08181	3.71092	0	0	0	0	3.2784	0
hsa-miR-645	0	3.77428	0	0	4.20099	0	0	3.12552	0	0	0	0	0	0	0	0	0	0	0	0	3.51351	3.36189	0	0	0	0	0	3.6141
hsa-miR-648	0	0	0	0	0	0	0	0	0	0	2.69851	0	0	0	0	0	0	0	0	3.89091	0	0	0	0	0	0	0	0
hsa-miR-6499-3p	0	0	0	0	3.36274	0	0	4.25437	4.32901	0	0	0	0	0	0	0	0	0	0	0	0	0	0	0	0	0	0	0
hsa-miR-6499-5p	-0.918882	0.669487	-0.770337	-0.607473	-0.354585	0.685903	-0.068845	1.83766	0.0670866	-0.166188	-0.18273	-4.66707	1.06196	0.638125	-1.86804	0.451076	0.32797	0.609957	-4.66707	0.557886	1.4252	1.16518	-0.819767	-0.0258059	-4.66707	-0.457411	0.0258059	0.388536
hsa-miR-650	0	0	0	0	0	0	0	0	0	0	0	0	2.82064	0	0	0	3.32754	0	0	0	3.3314	0	0	0	0	0	0	0
hsa-miR-6500-3p	0	3.50721	0	0	0	0	0	0	0	0	0	0	0	0	0	0	0	0	0	0	0	0	0	3.35215	3.33874	0	0	0
hsa-miR-6500-5p	4.18485	0	0	0	3.87274	0	0	3.75757	0	0	0	0	0	0	0	0	0	0	0	0	0	0	0	0	0	0	0	3.32929
hsa-miR-6501-3p	0	0	0	0	3.30628	3.14518	2.79366	0	0	0	4.57417	0	0	0	2.31708	0	3.85547	0	0	3.83712	0	0	0	0	0	0	0	4.57458
hsa-miR-6501-5p	0	0	0	0	0	0	0	0	0	0	0	0	2.7259	0	0	0	0	0	0	0	0	0	0	0	0	0	0	3.39306
hsa-miR-6502-3p	0	0	0	0	0	0	0	0	0	0	0	0	0	0	0	0	0	0	3.98702	0	0	0	0	0	0	0	0	0
hsa-miR-6502-5p	0	0	0	0	0	3.00458	0	0	0	0	0	0	0	0	2.32206	0	0	0	0	0	0	0	0	0	0	0	0	0
hsa-miR-6503-3p	0	0	0	2.3575	0	0	0	0	0	0	0	0	0	0	0	0	0	0	3.51134	3.71776	0	3.51292	0	0	0	3.3832	3.75824	3.54894
hsa-miR-6505-3p	0	0	0	2.53944	2.89487	0	0	0	0	0	0	0	0	0	0	0	0	0	3.8905	0	3.8944	3.91392	0	0	0	0	0	3.51423
hsa-miR-6505-5p	0	0	0	0	0	0	0	0	0	0	0	0	0	0	0	0	0	0	0	0	0	0	0	0	0	3.48086	0	0
hsa-miR-6506-3p	0	3.61002	0	0	2.63193	0	0	3.20581	0	0	0	0	0	0	0	0	0	0	0	3.28248	3.49656	0	0	0	0	0	3.21179	0
hsa-miR-6506-5p	3.88557	0	0	2.54083	3.09495	0	0	0	0	0	0	0	0	0	0	0	0	0	0	0	3.52051	0	0	0	0	0	0	3.60795
hsa-miR-6507-3p	0	0	0	0	0	0	0	0	0	0	0	0	0	0	0	0	0	0	0	0	0	0	0	0	0	0	0	3.84327
hsa-miR-6507-5p	0	3.8835	2.08468	3.12843	3.28949	2.65921	0	3.01951	0	0	0	0	0	0	0	0	2.98191	0	0	0	3.69033	3.47633	0	0	0	0	0	3.61202
hsa-miR-6508-5p	0	0	0	0	0	2.61433	0	0	0	0	0	0	0	0	0	0	0	0	0	0	0	0	0	0	0	0	0	0
hsa-miR-6510-3p	0	0	0	0	0	0	0	0	0	0	0	0	0	0	0	0	0	0	0	0	0	0	0	0	0	0	0	3.26521
hsa-miR-6510-5p	0.585993	-3.32724	-3.32724	-0.584128	0.692321	-3.32724	0.0172864	0.472983	0.271077	-0.145202	0.723184	0.595586	-0.23194	0.444924	-0.0172864	0.225637	0.195585	-0.295846	0.442849	-3.32724	2.14909	2.57042	-3.32724	-3.32724	-3.32724	-3.32724	-3.32724	0.518118
hsa-miR-6511a-3p	0	3.77362	0	0	0	0	0	0	0	0	0	0	0	0	0	0	0	0	0	0	3.08038	0	0	0	0	0	0	3.39009
hsa-miR-6511a-5p	-4.98419	-1.31349	-0.320171	-0.0916229	-0.274688	-0.842988	0.0702496	1.9006	0.0430774	0.292298	0.213317	-0.0430774	0.26301	0.170787	0.142593	-0.308166	0.746172	-0.801265	0.174133	0.601357	2.56969	0.432148	-1	-4.98419	-0.916761	-0.582129	0.258026	-0.0643484
hsa-miR-6511b-3p	0	0	0	0	0	2.92375	0	3.05516	2.57819	0	0	0	0	0	0	0	0	0	0	0	0	0	0	3.35035	0	0	0	4.37636
hsa-miR-6511b-5p	0.223333	-3.14268	-0.311562	0.205746	-0.471277	-3.14268	-0.0589086	0.654972	-0.385205	-0.153012	-0.00158463	0.108339	0.0264093	0.00158463	-0.826035	0.0967506	0.953315	-3.14268	-3.14268	1.63657	1.65766	1.55806	0.485051	-3.14268	-3.14268	-3.14268	0.0607903	1.17043
hsa-miR-6512-5p	3.4501	0	0	0	0	0	0	0	0	0	0	0	0	0	0	0	0	0	0	0	0	0	0	0	0	0	0	0
hsa-miR-6513-3p	6.33956	0	0	0	2.69394	0	0	0	0	0	0	0	0	0	0	0	0	0	3.4777	0	0	0	0	0	0	0	0	0
hsa-miR-6513-5p	0	3.44222	0	0	2.72194	2.88032	0	0	0	0	0	0	0	3.28512	0	0	0	0	0	0	0	0	0	0	0	3.27372	0	3.32618
hsa-miR-6514-3p	3.4491	0	0	0	3.3882	0	0	0	0	0	0	0	0	0	0	0	0	0	0	0	0	0	0	0	0	0	0	0
hsa-miR-6514-5p	6.90224	3.82211	0	0	0	0	0	0	0	0	0	0	0	0	0	0	0	0	3.85938	0	0	0	0	0	0	0	0	0
hsa-miR-6515-3p	0.460406	0.0907086	-0.879063	-0.10164	0.0714439	1.95775	-0.0527195	1.26213	0.178473	-0.281199	0.164198	-0.438784	0.399309	1.16064	-0.601336	0.552313	-0.525111	-0.32302	-0.551706	-0.892134	1.3992	0.0527195	-0.753003	1.21157	-2.31106	-0.278687	-0.675084	2.27738
hsa-miR-6515-5p	0	0	0	2.89876	3.97676	0	0	4.25061	2.44326	0	0	0	0	0	0	0	0	0	0	0	4.6328	0	0	0	0	0	4.03448	0
hsa-miR-652-3p	0	0	2.47597	0	2.78646	2.92253	0	0	3.05179	0	0	0	0	3.04171	0	0	3.30873	0	0	3.37796	3.99879	0	3.30665	0	2.9625	3.8235	3.28731	0
hsa-miR-652-5p	-0.390068	0.521718	-0.0770651	-0.162594	0.90447	0.520888	0.752003	1.22638	0.145978	-0.320745	1.27688	0.0770651	0.357529	1.4662	-0.163702	-0.508692	-0.441143	0.18322	-4.59174	-0.255527	1.12901	3.04119	-1.16903	-4.59174	-1.52917	-0.192619	-0.346407	1.66241
hsa-miR-653	0	0	0	0	0	0	0	0	0	0	0	0	0	0	0	0	0	0	0	0	3.40799	0	0	0	0	0	0	0
hsa-miR-654-5p	3.58373	3.73752	0	0	3.45873	0	0	4.14688	0	0	0	0	2.7631	0	0	0	0	0	3.91387	3.3637	4.50253	0	0	0	0	0	3.4245	3.889
hsa-miR-655	0	3.4029	0	0	2.60442	0	0	0	0	0	0	0	0	0	0	0	0	0	0	0	0	0	0	0	0	0	0	0
hsa-miR-658	-0.858385	-1.22374	-0.0276268	0.183644	0.828648	1.39138	0.0276268	1.7296	0.450715	0.571079	0.45434	1.26005	0.295299	0.751623	0.0499265	-1.27211	-0.11979	-0.920968	-0.138915	-0.276023	2.04946	0.931513	-1.24406	-1.99507	-1.94599	-1.6011	-0.533497	-0.126876
hsa-miR-659-3p	-2.5755	-2.5755	-2.5755	-2.5755	0.455454	0.536704	0.929075	1.09846	-0.0600195	-2.5755	0.582889	-2.5755	1.33232	1.87027	0.0600195	0.693587	1.33324	-2.5755	-2.5755	-2.5755	2.40044	2.87491	-2.5755	1.6679	-2.5755	-2.5755	-2.5755	1.97161
hsa-miR-659-5p	0	0	0	0	0	0	0	0	0	0	0	0	0	0	0	0	0	0	0	0	0	4.93365	0	0	0	0	0	0
hsa-miR-660-3p	0	0	0	0	0	0	0	0	0	0	0	0	0	0	0	0	0	0	0	3.49619	0	0	0	0	0	0	0	0
hsa-miR-660-5p	0	0	0	0	2.60406	0	2.8699	0	0	0	0	0	0	0	0	0	0	0	4.21583	0	0	0	0	0	0	0	0	0
hsa-miR-663a	-0.528909	-0.291421	0.0358513	-0.121857	0.010915	0.148951	0.0747592	1.14123	-0.223494	-0.315199	-0.010915	-0.0742515	0.0459762	-0.307146	-0.76047	-0.788916	0.228375	-1.52321	0.630598	0.641978	1.64971	1.15554	0.0915282	-1.60684	-0.777255	-1.46045	0.345804	0.779851
hsa-miR-663b	-0.457371	-0.804887	-0.417109	0.611403	0.0618056	-1.6015	0.0142914	1.40326	-0.285471	-0.958973	-0.996438	-0.256757	-0.0316872	-0.880057	0.922331	0.19222	0.360979	-4.48306	1.65899	-0.0142914	1.88061	0.461814	0.683493	0.121641	-1.30884	-4.48306	0.819765	0.415859
hsa-miR-664a-3p	-0.770183	-0.047917	0.070049	-0.309376	0.106551	0.703552	-0.230331	-5.95814	0.45025	0.667923	0.910806	-1.24242	-0.251353	-0.720263	-5.95814	0.276077	0.867012	-2.08497	-2.22396	1.19727	-2.13607	-5.95814	0.447667	1.64862	-0.393322	0.652983	1.26649	0.047917
hsa-miR-664a-5p	0	0	0	0	0	0	0	0	2.48585	0	0	2.33355	3.09283	0	0	0	0	0	0	0	0	3.49708	0	0	0	0	0	0
hsa-miR-664b-3p	-0.470217	0.57786	0.241607	0.756241	0.438754	-0.230502	-0.306606	-6.92197	0.811764	0.724036	0.543955	-0.917711	-0.519082	-1.97607	-6.92197	-1.17521	0.831009	-3.11444	-0.669794	1.56029	-3.64707	-2.24638	0.715444	0.992351	0.334627	0.230502	1.91816	-1.61134
hsa-miR-664b-5p	0	0	0	0	0	0	0	0	0	0	0	0	0	0	0	0	0	0	3.66404	0	0	0	0	0	0	3.27372	0	0
hsa-miR-665	-0.127572	0.0194368	-2.46132	-0.384331	0.249762	-1.0148	-0.0194368	0.546658	0.443378	0.628274	-0.0780691	-1.00405	0.973151	0.996046	-0.0790348	1.01159	1.35514	-1.24433	-0.639908	0.586088	1.80037	1.17794	0.50291	-0.738193	-1.36982	-1.05306	-0.0704168	0.658136
hsa-miR-668	3.96696	0	0	2.62742	3.64112	0	0	3.546	0	2.90646	0	0	2.70241	0	0	0	3.20453	0	0	0	0	3.40703	0	3.50258	0	0	0	3.32859
hsa-miR-670	0	0	0	3.3191	4.67883	0	0	3.30523	0	0	0	0	2.59246	0	0	0	0	0	3.97951	0	3.77526	5.12962	0	0	0	0	0	0
hsa-miR-671-3p	0.417186	0.931427	-0.192467	0.0378263	-0.531349	0.283814	-0.162364	-0.608002	-0.158103	-0.0959269	-0.534075	-1.56341	0.292547	0.458329	-3.83992	-3.83992	0.0243367	-0.0243367	-3.83992	0.310326	0.531279	0.595914	-3.83992	0.171177	-3.83992	0.513099	0.872665	0.626201
hsa-miR-671-5p	-0.0221083	0.0221083	-0.399907	0.258204	1.0773	0.897249	1.0856	0.639321	-0.0999844	-0.910733	1.17893	0.0749351	-0.0639002	0.55797	-1.94786	-4.72526	-0.02516	-4.72526	0.199451	-0.347394	0.611339	1.55493	-0.58343	-1.29952	-1.20363	-4.72526	0.0265882	1.65259
hsa-miR-6715b-5p	0	0	0	0	0	0	0	0	2.37168	0	4.11256	0	2.59246	0	0	0	0	0	0	0	0	3.55447	0	0	0	0	0	3.75021
hsa-miR-6716-3p	0	0	0	0	0	0	0	0	0	0	0	0	0	0	0	0	0	0	0	0	0	0	0	3.66447	0	0	0	0
hsa-miR-6716-5p	-0.27984	0.365528	-0.297421	-0.0321894	0.305007	-2.50524	0.172319	1.48552	0.370123	-0.00241564	0.487218	-0.468669	0.118408	0.82302	0.77834	-0.900197	-0.0615623	-1.39096	0.00241564	-0.285734	2.24624	0.617127	-0.762283	-5.16158	-0.796741	-1.12861	0.211958	0.0866457
hsa-miR-6717-5p	0	0	0	0	0	0	0	3.23719	0	0	0	0	0	0	0	0	0	0	0	0	4.24014	0	3.18078	0	0	0	0	0
hsa-miR-6721-5p	1.30146	-0.518197	0.25911	0.61176	0.478127	-0.000674508	0.302009	2.12153	0.310705	-0.168089	0.0748043	-0.161537	0.167236	0.232608	-0.190609	-0.338953	-0.763894	-1.84485	0.000674508	-0.676496	2.08585	0.0304959	-0.47161	-1.77471	-2.24117	-1.7999	-0.162251	0.904125
hsa-miR-6722-3p	-1.17007	0.0630879	0.143134	0.519544	0.576001	-0.249706	0.0776435	2.15387	0.0573603	-0.0181983	0.101044	-0.181256	0.0181983	0.488201	0.448558	-0.820709	-0.951378	-1.2466	-0.486174	-0.527627	2.36823	0.36321	-1.3309	-2.01616	-1.88651	-0.820811	-0.348305	0.148157
hsa-miR-6722-5p	1.9394	0.915124	-0.403592	0.0238755	0.225995	0.0510424	0.17511	1.12868	-0.0682475	-0.486318	-0.199185	-0.670924	-0.326069	0.805076	-5.50913	-0.0238755	-0.579754	-1.04859	-0.899644	-0.748104	0.436002	1.44091	-0.366815	0.616611	-1.96861	0.316938	0.0431188	1.41531
hsa-miR-6723-5p	-0.0661137	1.24734	-0.330998	-0.0270049	0.798804	1.23184	0.743759	2.83242	0.122707	-0.599535	0.00747572	0.705002	0.303152	-0.00747572	-1.69276	-1.26499	-0.570593	-0.388487	-4.80476	-0.493958	0.964221	0.241736	-1.08345	1.76688	-4.80476	0.363297	-0.104599	1.98596
hsa-miR-6724-5p	-1.14947	-1.2233	0.0441328	-0.0036718	-0.386797	-0.415681	0.0384489	1.21334	0.324323	-0.131165	0.449132	0.125496	0.263381	-0.0634635	-0.137691	-0.407972	0.137266	-1.36192	0.539344	0.0975596	1.6979	-0.436635	0.0036718	-1.12491	-0.927791	-1.91097	0.279446	1.26858
hsa-miR-675-3p	0	3.48855	0	0	2.92831	0	0	3.05946	0	0	0	0	0	0	0	3.068	0	0	0	0	0	3.35787	2.88482	3.39572	0	0	0	3.50226
hsa-miR-675-5p	0.028095	-0.524992	0.462457	-0.0729411	0.28965	2.70202	-0.0498084	0.61985	0.632515	0.205597	0.959047	1.72994	0.81042	-0.028095	-1.00012	-0.682836	-0.166985	-1.67943	-0.350092	0.314987	1.07025	-0.788998	-0.671821	-0.984904	-1.33544	-1.48104	0.127741	1.12938
hsa-miR-676-3p	3.34079	0	0	0	2.95595	0	0	0	0	0	0	0	0	0	0	0	0	0	0	0	0	0	0	0	0	0	0	0
hsa-miR-7-2-3p	0	3.76199	0	0	0	0	0	0	0	0	0	0	0	0	0	0	0	0	0	0	0	0	0	0	0	0	0	0
hsa-miR-7-5p	0	0	0	0	0	2.88404	0	0	0	2.79324	2.8496	0	2.77846	0	0	0	4.47396	3.44307	0	3.64846	0	3.44196	4.76274	3.43466	0	0	4.01218	0
hsa-miR-708-3p	0	0	0	0	0	0	0	0	0	0	0	0	0	0	0	0	3.08306	0	0	0	0	0	0	0	0	0	0	0
hsa-miR-708-5p	0	0	0	2.88639	3.05279	0	0	0	0	0	0	0	0	0	0	0	3.22474	0	0	0	0	0	0	0	0	0	0	3.32929
hsa-miR-711	-0.370643	-0.678822	-0.507282	0.268445	0.191904	-0.505028	0.822079	0.43283	0.645786	0.675595	1.55229	0.0597514	0.359076	1.26893	-1.08481	-1.10898	-0.349628	-2.27885	0.422283	-0.0597514	0.516263	0.745867	-0.12153	-1.58556	-0.954001	-5.25321	-0.166633	0.88403
hsa-miR-718	0.651062	-0.917318	-0.0173763	0.482055	0.111232	2.18061	0.223143	-1.36001	0.202228	-0.749161	0.0173763	0.793489	0.126634	-1.36055	-3.37405	-1.12612	-0.648169	-6.36157	0.610654	0.0245933	-1.46326	-2.15474	0.69	-0.0802569	-1.33614	-2.09457	0.418583	0.731477
hsa-miR-744-5p	-0.870667	-0.629482	0.146204	0.261355	0.176929	-0.323727	0.220734	2.07616	0.533351	0.0959742	0.652383	-0.0644254	0.231685	0.704992	-0.0606381	-1.32752	0.352457	-1.05949	-0.104921	0.164643	2.09608	-0.575734	-0.272578	-0.427618	-1.38627	-1.25202	0.0606381	-0.117232
hsa-miR-758-3p	0	3.64379	0	0	0	0	0	0	0	0	0	0	0	0	0	0	0	0	4.65372	0	0	3.51016	0	0	0	0	3.69206	0
hsa-miR-758-5p	3.68711	0	0	0	0	2.99893	3.02171	0	2.6577	2.96201	3.18626	0	0	4.03187	0	0	0	2.73659	4.27037	0	4.57708	0	2.82883	0	0	0	0	3.39118
hsa-miR-760	-0.610948	-0.234395	-0.0638222	0.479638	0.44501	-0.718743	0.421939	2.37664	0.143547	-0.135962	0.456032	-0.354205	0.371898	0.372295	0.365001	-0.367854	-0.435095	-1.48889	0.0638222	-0.358264	2.73228	0.407401	-0.360379	-0.902442	-1.54645	-0.891899	0.436422	0.99699
hsa-miR-762	-0.642859	0.425354	0.509147	0.961308	0.888797	-0.765992	0.426198	1.8007	0.26186	-0.246053	0.232381	0.23596	0.158951	-0.0369123	-0.186972	-1.35505	-0.560344	-1.59915	0.217284	-0.196396	1.73184	-0.327886	-0.717599	-1.74967	-1.43351	-0.881654	0.0369123	0.407377
hsa-miR-764	-3.44979	0.592329	-0.793915	-0.0335265	-0.424749	1.85908	-0.61977	-3.44979	0.289331	0.408947	0.229775	-3.44979	0.850394	0.914041	-3.44979	0.354749	-0.436299	-0.384524	-3.44979	-3.44979	0.428025	0.0335265	0.255128	1.24717	-3.44979	0.257358	-0.239541	1.76422
hsa-miR-765	0	0	0	0	0	0	2.81276	0	0	0	2.96335	0	0	0	0	0	0	0	3.7855	3.98283	0	4.83497	0	0	0	0	0	0
hsa-miR-766-3p	3.51367	0	0	0	0	0	2.64987	0	0	0	0	0	3.35413	0	0	0	3.26427	0	0	0	3.35236	0	0	3.6935	0	0	0	4.60211
hsa-miR-766-5p	0	0	0	0	0	0	0	0	0	0	0	0	0	0	0	0	0	0	0	0	3.86874	3.2506	0	0	0	0	4.04675	3.7036
hsa-miR-767-5p	0	0	0	2.51113	3.88238	0	0	0	0	0	0	0	0	0	0	0	0	0	0	0	0	0	0	0	0	0	0	3.26641
hsa-miR-769-3p	0	0	0	0	0	0	0	0	0	0	0	0	0	0	0	0	3.43893	0	0	0	3.28233	0	0	0	0	0	0	0
hsa-miR-769-5p	-3.45712	0.597578	-0.0847517	0.445222	0.891726	-3.45712	-3.45712	-3.45712	1.80105	0.92402	0.760229	-0.778339	0.21641	-3.45712	-3.45712	0.0847517	1.63152	-3.45712	-3.45712	0.794713	-3.45712	-0.103747	0.37103	0.117207	0.0898629	-3.45712	1.21738	-3.45712
hsa-miR-802	0	0	0	0	0	0	0	0	0	0	0	0	0	0	0	0	0	0	0	0	0	0	0	3.35897	0	0	3.21602	0
hsa-miR-873-3p	0	0	0	0	0	0	2.72006	0	3.16406	0	3.09119	0	0	4.34206	0	0	0	0	3.9061	0	0	4.12055	0	0	0	0	0	0
hsa-miR-874	0.698079	0.716652	0.125425	0.85291	1.08622	0.60716	0.667568	0.754701	0.14035	-0.0632503	0.0330587	-0.430373	-0.0330587	-0.318729	-4.45323	-0.941624	-0.364711	-0.873324	-0.110187	-0.425298	0.390537	0.14899	-0.501414	-0.212275	-1.36532	-0.525512	0.217788	1.73293
hsa-miR-875-3p	3.60378	4.02337	0	0	0	0	0	0	0	0	0	0	0	0	0	0	0	0	0	0	0	0	0	0	0	0	3.27873	0
hsa-miR-875-5p	0	0	0	0	0	0	0	0	0	0	0	0	0	0	0	0	0	0	0	0	0	0	0	0	0	0	0	3.70828
hsa-miR-877-3p	3.38689	0	0	0	0	0	0	0	0	0	0	0	0	0	0	0	0	0	0	0	0	0	0	0	0	0	0	3.88517
hsa-miR-877-5p	0	0	0	0	0	0	0	0	3.8603	0	0	0	0	0	0	0	3.58803	0	0	0	4.29305	0	0	0	0	0	0	0
hsa-miR-885-3p	-5.58693	-1.27527	0.00705351	-0.202251	-0.705334	-0.422495	0.022766	2.82265	0.298355	0.811853	0.243763	0.575042	0.747279	0.483974	1.96215	0.956603	0.546457	-0.623725	-0.00705351	0.630903	3.01898	-0.0580023	-0.557519	-1.8821	-1.27752	-1.18071	-0.0238748	-0.0830562
hsa-miR-887	-0.504482	0.133969	-0.464042	-0.0999722	0.417258	0.777161	-0.0132121	1.0008	0.374283	0.0021393	-0.0901025	-0.812371	0.414057	1.08705	-1.93767	-0.253078	-0.0021393	0.174405	-1.83649	0.528425	0.518064	-0.127172	-1.01332	-0.335128	-1.41934	0.138657	0.19969	0.267757
hsa-miR-888-3p	0	0	0	0	0	0	0	0	0	0	0	0	0	3.28607	0	0	0	0	0	0	0	0	0	0	0	0	0	0
hsa-miR-888-5p	0	0	0	0	0	0	0	0	0	0	0	0	0	3.14411	0	0	0	0	0	0	0	0	0	0	0	0	0	0
hsa-miR-890	0	0	0	0	0	0	0	0	0	0	0	0	0	0	0	0	0	0	0	0	0	0	0	0	2.96104	0	0	3.44217
hsa-miR-891a	0	0	0	0	0	0	0	0	0	0	0	0	0	0	0	0	0	0	0	0	0	3.28947	0	0	0	0	3.33293	0
hsa-miR-891b	0	0	0	0	0	0	0	0	0	0	0	0	0	3.4534	0	0	0	0	0	0	0	0	0	0	0	0	0	0
hsa-miR-9-3p	0	0	0	0	0	0	0	0	0	0	0	0	0	0	0	0	3.22201	0	0	0	0	0	5.90138	0	0	0	0	0
hsa-miR-9-5p	0	0	0	0	3.16352	0	0	0	0	0	0	0	0	0	0	0	0	2.8036	0	0	0	0	7.85323	3.45316	0	0	0	3.33593
hsa-miR-920	-3.9309	-0.13711	-1.38739	-0.147132	-0.391596	0.504309	-0.138667	1.31965	0.776153	0.664865	0.126559	-1.58835	1.04629	1.75824	-1.45127	-0.117032	0.800334	0.117032	-0.327699	-0.611999	1.73189	0.842676	-0.22984	1.4034	-3.9309	0.446439	-3.9309	1.35046
hsa-miR-921	3.37397	0	0	0	0	0	3.29681	0	2.81263	2.92089	4.96504	0	3.1017	3.09429	0	0	4.12216	0	0	0	3.41792	3.25966	2.96212	0	0	0	0	0
hsa-miR-92a-1-5p	0	0	0	0	0	0	0	0	0	0	0	0	0	0	0	0	0	0	0	0	0	3.29165	0	0	0	0	0	0
hsa-miR-92a-2-5p	-4.95316	-0.712252	-0.543712	0.288644	1.35388	-4.95316	2.01125	0.680511	0.369945	-1.14257	1.47977	-0.835491	-0.274058	0.352333	-0.788556	-1.49851	-0.222096	-1.86403	1.56373	0.228091	0.456874	1.36766	0.222096	-1.29384	-0.608888	-4.95316	0.812903	1.08137
hsa-miR-92a-3p	-0.402439	0.0331862	0.649615	0.541269	1.22995	-0.0834675	0.00135182	-1.2418	0.738484	0.176142	-0.561077	-0.459162	-0.00135182	-2.26875	-6.07282	0.107277	1.77415	-0.547101	1.03151	2.51505	-1.32795	-0.872733	1.93781	2.19242	-0.137814	-2.07463	1.56696	-0.0571778
hsa-miR-92b-3p	-0.801258	-0.0353218	0.195233	-0.11691	0.222924	0.0353218	0.441863	-2.65033	1.16657	0.181574	0.334328	-1.06865	-0.0972596	-1.53422	-5.78811	-0.477655	1.13019	-1.49729	0.963353	2.80488	-2.30689	-5.78811	1.30124	1.19086	0.35752	-5.78811	1.90933	-0.413837
hsa-miR-92b-5p	-0.964188	-1.01093	-0.52657	-0.20914	-0.416766	-0.637497	0.344299	1.74569	0.482134	0.220338	1.16099	-0.146447	0.571825	0.65862	-0.161855	-1.01641	0.181764	-1.15194	0.603242	0.146447	1.82255	0.59193	-0.248976	-1.29903	-0.926104	-2.30824	0.182937	1.32947
hsa-miR-93-5p	-0.366554	-0.220016	0.70682	0.746055	1.93151	-0.116057	0.0378156	-1.32465	1.19908	-0.0378156	-0.684336	-0.426438	0.650781	-5.25554	-5.25554	0.398018	3.20895	-0.405018	0.788327	2.37836	-0.441689	-0.52758	2.84821	2.5163	-0.291379	-1.40198	2.32078	1.12231
hsa-miR-933	-2.8428	0.85778	-0.539345	-0.350326	-2.8428	-2.8428	-0.175038	0.428809	-2.8428	-0.329333	0.54949	-2.8428	-2.8428	0.896918	-2.8428	-2.8428	0.0929863	0.0517465	0.81048	0.977218	1.97673	1.14093	-0.0517465	0.754255	0.125691	-2.8428	1.23896	1.3789
hsa-miR-935	0	0	0	0	0	0	0	0	0	0	0	0	0	0	0	0	0	0	0	0	0	0	0	0	0	0	3.87238	0
hsa-miR-936	0	0	0	0	0	0	0	0	0	0	0	0	0	0	0	0	0	0	0	0	0	0	0	0	0	0	0	3.60539
hsa-miR-937-3p	0	0	0	0	0	0	0	0	0	0	0	0	0	0	0	0	0	0	3.80426	0	3.2031	0	0	0	0	0	0	0
hsa-miR-937-5p	-0.424215	-0.681269	-0.0676528	0.382555	0.79055	-0.559583	0.553982	1.55052	0.543839	-0.416336	0.34954	0.0309282	-0.0403311	-0.0309282	-0.382585	-1.36738	-0.343423	-1.17816	1.68404	0.280008	1.53715	-0.529562	0.608114	0.116828	-1.10027	-1.77798	0.924646	0.998523
hsa-miR-939-3p	-2.82986	-2.82986	-0.591519	-0.234416	-2.82986	0.444302	0.380361	-2.82986	0.808989	0.852666	0.452931	-0.212926	1.07371	1.03482	-2.82986	-2.82986	0.212926	-2.82986	1.41671	1.37005	-2.82986	-2.82986	0.519141	0.80519	-2.82986	-2.82986	1.38659	1.17412
hsa-miR-939-5p	-1.27437	0.508084	-0.915573	-1.47188	-0.869343	-1.83341	-0.848016	3.23704	-0.200035	0.834483	-0.466965	-2.06611	-0.454765	1.20158	2.03587	1.80492	-0.0722126	0.323376	-1.86546	0.773178	3.49077	0.514369	0.0722126	-0.381925	-1.64939	0.815397	0.76031	2.18225
hsa-miR-940	1.12526	0.276567	-0.0916835	0.229242	0.644445	0.8627	0.0136653	-0.0971911	-0.0136653	-0.265445	-0.488218	-0.0519122	0.299838	-1.67788	-2.45171	0.52966	0.98171	-2.16921	1.12176	1.09155	-0.347057	-1.20742	1.36194	-0.0743425	-0.488663	-1.11138	1.79747	1.72876
hsa-miR-941	3.53968	0	0	0	3.81902	0	0	4.05285	3.87857	0	0	0	0	0	0	0	3.25186	0	4.56252	3.55803	0	0	0	0	0	0	0	0
hsa-miR-942	0	3.90928	0	0	4.36799	0	0	3.05516	0	0	0	0	0	0	0	0	0	0	3.49263	0	0	0	0	0	0	0	0	3.26641
hsa-miR-943	0	0	0	2.56502	4.27687	0	0	3.70603	0	0	0	0	0	0	0	0	2.97528	0	0	4.35853	0	0	0	0	0	0	0	0
hsa-miR-95	0	0	0	2.96056	0	2.92196	0	0	0	0	0	0	0	0	0	0	3.97993	0	0	0	3.3215	0	0	0	0	0	0	3.60492
hsa-miR-96-3p	0	0	0	0	0	0	0	0	0	0	2.89757	0	0	0	0	0	0	0	0	0	0	0	0	0	0	0	0	0
hsa-miR-96-5p	-3.2967	-3.2967	-0.529759	-0.307394	1.82626	0.910902	0.151094	-3.2967	0.319423	-3.2967	-3.2967	-3.2967	1.04495	-0.151094	-3.2967	-3.2967	2.10202	-3.2967	1.66734	2.82309	0.186821	0.732276	3.81672	1.4438	-3.2967	-3.2967	2.14398	1.19682
hsa-miR-98-3p	3.85484	0	0	0	0	0	0	3.05516	0	0	0	0	0	0	0	0	0	0	0	0	4.31324	0	0	0	0	0	3.55172	4.22337
hsa-miR-98-5p	-0.599948	0.669041	-0.0415536	0.432644	0.752361	0.246019	0.0506031	-5.88426	1.06983	0.521975	-0.170258	-1.40538	0.0415536	-1.77463	-5.88426	-1.40076	1.43575	-1.21055	0.522875	1.90872	-1.65826	-1.02609	1.0945	-0.445107	-0.562427	-5.88426	0.935955	0.0923427
hsa-miR-99a-3p	0	0	0	0	2.61934	0	0	0	0	0	0	0	0	0	0	0	0	0	0	0	0	3.8478	0	0	0	0	3.68967	3.92316
hsa-miR-99a-5p	0.961456	0.95153	0.508962	1.27385	2.03942	0.301729	0.971916	-2.29946	0.809964	0.0504629	-0.184459	-0.793894	-0.0504629	-2.10591	-8.00573	-2.62227	0.968695	-0.646833	-0.474326	-0.67974	-2.12425	0.605592	0.859575	0.921323	-3.21095	-3.17102	-0.443485	1.6277
hsa-miR-99b-3p	0	3.83126	0	0	0	2.70689	0	0	2.73244	0	3.62808	2.94747	0	3.80304	0	0	0	0	4.17974	0	4.11338	0	0	3.99113	3.38422	0	0	3.60748
hsa-miR-99b-5p	0.365317	0.723115	0.904966	1.39992	1.94363	-0.0254316	0.783308	-5.76042	0.559447	0.500505	0.0131426	-0.039398	-0.00757226	-2.1925	-5.76042	-2.32424	1.6138	-0.658026	-0.225304	0.921829	-1.94926	-0.00376514	-0.00503307	0.270926	-5.76042	-5.76042	0.00376514	0.468996
