# Supplementary material for: Investigating microRNA Profiles in Prostate Cancer Bone Metastases and Functional Effects of microRNA-23c and microRNA-4328
Source: Cancers (Basel). 2023 Apr 24;15(9):2437. doi: 10.3390/cancers15092437 (PMC10177411; doi:10.3390/cancers15092437)
Supplement: Supplementary file 1 [file cancers-15-02437-s001.zip › Supplementary Table S2.xlsx]

## Sheet: 22Rv1
Table S2. Relative protein levels in 22Rv1 cells overexpressing miRNA-23c, miRNA-4328, or a nontarget control sequence (NTC), obtained by LC-MS/MS analysis.
Accession	Gene	Description	Coverage	# Peptides	# PSMs	# Unique Peptides	MW [kDa]	Ratio (sample/REF)									Normalized abundance										miRNA-23c vs. NTC			miRNA-4328 vs. NTC
								NTC			miRNA-23c			miRNA-4328			REF PC-3	NTC			miRNA-23c			miRNA-4328
								1	2	3	1	2	3	1	2	3		1	2	3	1	2	3	1	2	3	log2fc	p.val	p.adj	log2fc	p.val	p.adj
A0A0B4J2D5	GATD3B	Glutamine amidotransferase-like class 1 domain-containing protein 3B, mitochondrial OS=Homo sapiens OX=9606 GN=GATD3B PE=1 SV=1	40	8	13	8	28.1	0.967	1.21	1.174	0.87	1.037	0.853	0.949	1.001	1.076	2487.8	2405	3009.1	2921.3	2164.4	2580.6	2122.3	2360.7	2490.6	2676.8	-1.06	0.22067	0.909	-1.87	0.0430717	0.983
A0A0U1RRL7	MMP24OS	Protein MMP24OS OS=Homo sapiens OX=9606 GN=MMP24OS PE=1 SV=1	37	1	1	1	7.7	0.987	1.259	1.26	1.17	0.688	0.834	0.617	0.782	0.989	49.1	48.4	61.7	61.8	57.4	33.8	40.9	30.3	38.3	48.5	-3.16	0.0242012	0.53	-2.17	0.0995616	0.991
A0AV96	RBM47	RNA-binding protein 47 OS=Homo sapiens OX=9606 GN=RBM47 PE=1 SV=2	14	6	8	6	64.1	0.904	0.868	1.105	0.759	0.812	0.772	0.851	1.28	1.451	1201.5	1086.6	1043	1328	912.3	975.6	927.1	1022.6	1538.2	1743.5	1.53	0.192615	0.899	-1.71	0.14893	0.993
A0AVF1	TTC26	Intraflagellar transport protein 56 OS=Homo sapiens OX=9606 GN=TTC26 PE=2 SV=1	1	1	1	1	64.1	0.969	1.027	0.953	1.055	1.092	0.974	1.299	1.082	1.353	148.7	144.1	152.8	141.7	157	162.4	144.9	193.3	160.9	201.2	2.12	0.00860433	0.312	0.828	0.233131	0.995
A0AVT1	UBA6	Ubiquitin-like modifier-activating enzyme 6 OS=Homo sapiens OX=9606 GN=UBA6 PE=1 SV=1	15	15	20	15	117.9	1.015	1.051	1.008	1.025	1.048	1.047	0.789	0.989	0.996	3122.7	3168.1	3281.2	3148.5	3201.9	3271.6	3268.2	2464	3088.6	3111.4	-1.19	0.0816883	0.804	0.356	0.575151	0.997
A0FGR8	ESYT2	Extended synaptotagmin-2 OS=Homo sapiens OX=9606 GN=ESYT2 PE=1 SV=1	10	7	7	7	102.3	0.953	0.929	0.997	1.049	1.004	1.098	0.954	1.007	0.882	684.6	652.4	636.3	682.4	718	687.6	751.5	653.3	689.5	603.7	-0.16	0.781964	0.966	1.22	0.0551911	0.986
A0JNW5	UHRF1BP1L	UHRF1-binding protein 1-like OS=Homo sapiens OX=9606 GN=UHRF1BP1L PE=1 SV=2	0	1	1	1	164.1	1.078	1.045	0.828	1.197	1.211	1.079	1.031	0.915	0.812	229.9	247.9	240.2	190.3	275.2	278.4	248	237.1	210.5	186.7	-0.719	0.417375	0.944	1.84	0.0557118	0.986
A0MZ66	SHTN1	Shootin-1 OS=Homo sapiens OX=9606 GN=SHTN1 PE=1 SV=4	20	12	13	12	71.6	0.826	0.637	0.802	0.995	0.621	1.134	1.091	0.977	1.324	2610.3	2154.9	1662.3	2094	2597.2	1620.8	2960.7	2847.6	2550.1	3457	3.11	0.0161072	0.41	1.7	0.145295	0.993
A1IGU5	ARHGEF37	Rho guanine nucleotide exchange factor 37 OS=Homo sapiens OX=9606 GN=ARHGEF37 PE=2 SV=2	3	2	2	2	76.2	1.444	1.268	0.67	1.905	1.709	1.777	2.196	0.417	0.551	184.2	265.9	233.5	123.3	350.9	314.8	327.2	404.5	76.9	101.4	-1.46	0.483234	0.95	3.06	0.158116	0.993
A1L0T0	ILVBL	2-hydroxyacyl-CoA lyase 2 OS=Homo sapiens OX=9606 GN=ILVBL PE=1 SV=2	8	4	5	4	67.8	0.944	0.953	0.934	1.049	0.987	1.185	0.963	1	0.854	474.6	448	452.1	443.1	497.7	468.5	562.5	457.1	474.7	405.2	-0.0197	0.976454	0.971	1.56	0.0368758	0.981
A1L390	PLEKHG3	Pleckstrin homology domain-containing family G member 3 OS=Homo sapiens OX=9606 GN=PLEKHG3 PE=1 SV=1	1	1	1	1	134.3	0.892	1.124	0.956	1.032	0.859	1.009	1.01	1.132	1.158	44.4	39.6	49.9	42.4	45.8	38.1	44.8	44.8	50.2	51.4	1.16	0.178652	0.893	-0.0158	0.984649	0.998
A1X283	SH3PXD2B	SH3 and PX domain-containing protein 2B OS=Homo sapiens OX=9606 GN=SH3PXD2B PE=1 SV=3	4	4	4	4	101.5	1.025	0.665	0.886	1.053	0.957	0.836	1.04	1.23	1.481	148.4	152	98.7	131.5	156.2	142	124	154.4	182.4	219.7	2.91	0.00951897	0.33	0.643	0.497098	0.997
A2RRP1	NBAS	Neuroblastoma-amplified sequence OS=Homo sapiens OX=9606 GN=NBAS PE=1 SV=2	3	8	10	8	268.4	0.954	0.849	1.109	0.904	0.89	0.916	0.944	1.164	1.031	958.3	914.2	813.3	1062.5	866.3	852.9	877.4	904.9	1115	987.8	0.639	0.426181	0.945	-0.846	0.297797	0.995
A2RTX5	TARS3	Threonine--tRNA ligase 2, cytoplasmic OS=Homo sapiens OX=9606 GN=TARS3 PE=1 SV=1	2	2	2	1	92.6	1.072	1.207	1.335	0.952	1.186	0.94	0.959	1.121	1.269	73.7	79	89	98.3	70.2	87.4	69.3	70.7	82.6	93.6	-0.843	0.356919	0.937	-1.52	0.111843	0.991
A2RU48	SMCO3	Single-pass membrane and coiled-coil domain-containing protein 3 OS=Homo sapiens OX=9606 GN=SMCO3 PE=1 SV=1	5	1	1	1	24.9	1.001	1.122	0.827	1.072	0.848	1.036	1.14	0.904	1.065	61	61.1	68.5	50.5	65.4	51.8	63.2	69.6	55.2	65	0.458	0.666386	0.961	0.177	0.867266	0.998
A2RUC4	TYW5	tRNA wybutosine-synthesizing protein 5 OS=Homo sapiens OX=9606 GN=TYW5 PE=1 SV=1	2	1	1	1	36.5	0.987	1.199	1.21	0.915	1.008	0.885	0.878	0.986	1.117	127.5	125.9	152.9	154.2	116.7	128.5	112.8	111.9	125.8	142.4	-1.43	0.105711	0.839	-1.88	0.0404905	0.983
A3KMH1	VWA8	von Willebrand factor A domain-containing protein 8 OS=Homo sapiens OX=9606 GN=VWA8 PE=1 SV=2	12	20	23	20	214.7	1.006	1.083	0.998	1.014	1.037	1.021	1.058	0.98	1.018	2303.2	2317	2493.8	2298.5	2335.2	2388.2	2352.4	2436.5	2258.1	2344.2	-0.154	0.786848	0.966	0.13	0.819057	0.997
A3KN83	SBNO1	Protein strawberry notch homolog 1 OS=Homo sapiens OX=9606 GN=SBNO1 PE=1 SV=1	3	3	3	3	154.2	0.903	0.867	0.754	1.167	0.906	1.224	1.114	0.971	0.842	256.4	231.6	222.3	193.3	299.2	232.3	313.8	285.7	249.1	215.8	1.34	0.209764	0.906	2.57	0.0278915	0.977
A4D1E9	GTPBP10	GTP-binding protein 10 OS=Homo sapiens OX=9606 GN=GTPBP10 PE=1 SV=1	21	7	9	7	42.9	0.951	1.105	1.055	0.959	0.982	0.921	1.043	1.059	1.18	2091.6	1988.5	2310.9	2207.4	2006.5	2054	1927.4	2182.1	2215	2468.1	0.55	0.375681	0.94	-0.87	0.17347	0.994
A4D1P6	WDR91	WD repeat-containing protein 91 OS=Homo sapiens OX=9606 GN=WDR91 PE=1 SV=2	6	4	4	4	83.3	0.975	0.89	1.037	0.928	0.962	0.895	1.005	1.099	1.061	259.4	252.8	230.8	269.1	240.7	249.6	232.3	260.7	285.1	275.4	0.882	0.150408	0.878	-0.513	0.386559	0.996
A4D2B0	MBLAC1	Metallo-beta-lactamase domain-containing protein 1 OS=Homo sapiens OX=9606 GN=MBLAC1 PE=1 SV=1	10	1	1	1	27.2	0.654	1.642	1.442	0.999	1.489	1.135	1.186	1.481	1.121	31.8	20.8	52.1	45.8	31.7	47.3	36	37.7	47	35.6	0.905	0.552905	0.955	0.531	0.726246	0.997
A5PLN9	TRAPPC13	Trafficking protein particle complex subunit 13 OS=Homo sapiens OX=9606 GN=TRAPPC13 PE=1 SV=2	5	2	2	2	46.5	0.986	1.752	1.171	1.036	0.907	0.868	0.942	0.767	0.919	268.7	265	470.8	314.6	278.3	243.6	233.2	253	206	247	-2.95	0.0103815	0.345	-2.3	0.0340124	0.98
A5YKK6	CNOT1	CCR4-NOT transcription complex subunit 1 OS=Homo sapiens OX=9606 GN=CNOT1 PE=1 SV=2	14	26	29	26	266.8	0.948	0.707	1.008	0.956	0.81	0.993	0.946	1.075	1.004	3972.6	3766.7	2808.9	4002.4	3797.8	3217.2	3944.7	3759.8	4269.2	3990.3	0.948	0.246997	0.917	0.161	0.839008	0.998
A6H8Y1	BDP1	Transcription factor TFIIIB component B'' homolog OS=Homo sapiens OX=9606 GN=BDP1 PE=1 SV=3	2	4	4	4	293.7	1.006	0.915	0.779	1.187	0.978	1.089	1.109	0.969	1.099	338.7	340.7	309.9	263.8	402.1	331.5	368.9	375.7	328.3	372.4	1.48	0.100188	0.832	1.96	0.0376115	0.982
A6NC98	CCDC88B	Coiled-coil domain-containing protein 88B OS=Homo sapiens OX=9606 GN=CCDC88B PE=1 SV=1	0	1	1	1	164.7	1.014	1.072	1.094	1.017	1.227	0.928	1.058	0.991	1.2	143.7	145.7	154	157.2	146.1	176.2	133.3	152	142.4	172.4	0.0523	0.948872	0.971	-0.112	0.890714	0.998
A6NCM1	IQCA1L	IQ and AAA domain-containing protein 1-like OS=Homo sapiens OX=9606 GN=IQCA1L PE=3 SV=3	1	1	1	1	95	1.072	1.068	1.061	0.915	1.113	0.906	0.894	1.002	0.962	317.3	340.1	338.9	336.5	290.3	353.2	287.6	283.6	317.9	305.4	-1.45	0.072121	0.784	-1.05	0.174101	0.994
A6NDG6	PGP	Glycerol-3-phosphate phosphatase OS=Homo sapiens OX=9606 GN=PGP PE=1 SV=1	31	9	15	9	34	0.88	1.113	0.975	1.129	1.168	1.035	1.05	1.071	0.968	2253.8	1983.8	2509.5	2196.5	2544.2	2631.5	2333.7	2367.5	2412.8	2181.1	0.536	0.483546	0.95	1.56	0.0597339	0.987
A6NDU8	C5orf51	UPF0600 protein C5orf51 OS=Homo sapiens OX=9606 GN=C5orf51 PE=1 SV=1	9	2	2	2	33.6	1.085	1.02	0.824	1.231	1.042	1.12	1.138	0.995	0.99	54.2	58.8	55.3	44.6	66.7	56.5	60.7	61.7	53.9	53.7	0.517	0.563625	0.956	1.63	0.0891744	0.99
A6NFI3	ZNF316	Zinc finger protein 316 OS=Homo sapiens OX=9606 GN=ZNF316 PE=1 SV=1	3	2	2	2	108.4	1.076	0.952	1.038	1.074	0.896	1.068	1.136	1.036	1.043	252.7	271.9	240.4	262.3	271.3	226.4	269.9	286.9	261.6	263.5	0.432	0.5853	0.957	0.00317	0.996779	0.998
A6NHL2	TUBAL3	Tubulin alpha chain-like 3 OS=Homo sapiens OX=9606 GN=TUBAL3 PE=1 SV=2	7	3	10	1	49.9	0.979	1.026	1.048	1	1.068	1.032	0.94	1.031	1.017	444.4	434.9	456	465.9	444.6	474.5	458.6	417.8	458.4	452.1	-0.364	0.510502	0.952	0.345	0.531699	0.997
A6NHR9	SMCHD1	Structural maintenance of chromosomes flexible hinge domain-containing protein 1 OS=Homo sapiens OX=9606 GN=SMCHD1 PE=1 SV=2	19	32	41	32	226.2	1.044	0.974	0.91	1.039	1.064	1.064	1.071	0.979	0.964	5635.9	5886.7	5487.5	5130.6	5854.6	5995.1	5995.7	6033.8	5515.4	5434.8	0.244	0.713196	0.963	1.06	0.129719	0.992
A6NHX0	CASTOR2	Cytosolic arginine sensor for mTORC1 subunit 2 OS=Homo sapiens OX=9606 GN=CASTOR2 PE=1 SV=3	2	1	1	1	36	0.897	1.13	1.18	0.515	0.782	0.622	0.574	1.021	1.396	84.4	75.7	95.3	99.5	43.5	65.9	52.4	48.4	86.1	117.8	-0.763	0.56378	0.956	-3.37	0.0244953	0.974
A6NIH7	UNC119B	Protein unc-119 homolog B OS=Homo sapiens OX=9606 GN=UNC119B PE=1 SV=1	20	4	4	4	28.1	0.98	1.084	1.055	0.901	0.978	0.928	0.963	0.96	1.048	147.6	144.6	160.1	155.8	133.1	144.3	137	142.1	141.7	154.7	-0.666	0.269012	0.922	-1.17	0.0662083	0.988
A6NJ78	METTL15	12S rRNA N4-methylcytidine (m4C) methyltransferase OS=Homo sapiens OX=9606 GN=METTL15 PE=1 SV=1	10	3	3	3	46.1	1.057	1.006	0.911	1.106	1.049	1.162	1.148	0.978	0.975	356.3	376.7	358.3	324.6	394.1	373.9	414	409.1	348.3	347.4	0.337	0.66732	0.961	1.37	0.100856	0.991
A6NK59	ASB14	Ankyrin repeat and SOCS box protein 14 OS=Homo sapiens OX=9606 GN=ASB14 PE=2 SV=2	1	1	3	1	65.3	0.998	0.976	0.966	0.851	0.936	0.924	0.9	0.931	0.909	2081.1	2076.8	2031	2009.4	1771	1948.7	1922.3	1873.1	1938.4	1891.8	-0.863	0.121488	0.856	-0.893	0.110371	0.991
A6NKD9	CCDC85C	Coiled-coil domain-containing protein 85C OS=Homo sapiens OX=9606 GN=CCDC85C PE=1 SV=1	5	2	2	2	45.2	0.971	1.097	1.103	0.859	0.933	0.781	0.957	1.215	1.475	269.6	261.8	295.8	297.4	231.6	251.6	210.6	258.1	327.5	397.7	0.798	0.36764	0.939	-2.11	0.0314627	0.979
A6NKF1	SAC3D1	SAC3 domain-containing protein 1 OS=Homo sapiens OX=9606 GN=SAC3D1 PE=1 SV=2	5	1	1	1	43.5	0.981	0.981	1.065	1.067	1.048	1.045	1.33	1.306	1.042	29.4	28.9	28.8	31.3	31.4	30.8	30.7	39.1	38.4	30.6	1.68	0.0351961	0.632	0.722	0.321842	0.996
A6ZKI3	RTL8C	Retrotransposon Gag-like protein 8C OS=Homo sapiens OX=9606 GN=RTL8C PE=1 SV=1	17	2	2	1	13.2	0.824	1.002	0.978	0.999	1.235	1.085	0.973	1.09	1.047	72.1	59.4	72.3	70.6	72.1	89.1	78.2	70.2	78.6	75.5	1.03	0.192447	0.899	1.87	0.029164	0.978
A8CG34	POM121C	Nuclear envelope pore membrane protein POM 121C OS=Homo sapiens OX=9606 GN=POM121C PE=1 SV=3	5	3	4	3	125	0.918	1.045	0.888	0.955	0.808	0.968	0.929	0.965	0.88	248.4	228.1	259.6	220.7	237.2	200.7	240.4	230.9	239.7	218.7	-0.333	0.630543	0.959	-0.343	0.620717	0.997
A8MPP1	DDX11L8	Putative ATP-dependent RNA helicase DDX11-like protein 8 OS=Homo sapiens OX=9606 GN=DDX11L8 PE=1 SV=1	3	3	3	2	101.7	1.019	0.787	0.868	0.993	1.149	1.031	0.926	0.928	0.929	53.3	54.3	42	46.3	52.9	61.3	55	49.4	49.5	49.6	0.0567	0.936539	0.97	1.73	0.031378	0.979
A8MSI8	LYRM9	LYR motif-containing protein 9 OS=Homo sapiens OX=9606 GN=LYRM9 PE=3 SV=2	13	1	1	1	9.4	1.481	1.121	1.613	1.418	1.348	0.74	1.505	1.598	1.033	99	146.6	110.9	159.6	140.3	133.4	73.3	149	158.2	102.2	-0.294	0.841442	0.968	-1.42	0.344737	0.996
A8MT69	CENPX	Centromere protein X OS=Homo sapiens OX=9606 GN=CENPX PE=1 SV=1	11	1	1	1	9	1.194	1.057	0.821	1.079	0.995	1.037	0.979	0.871	0.661	112.5	134.4	118.9	92.4	121.3	112	116.7	110.2	97.9	74.4	-1.68	0.108449	0.842	0.333	0.733291	0.997
A8MXV4	NUDT19	Nucleoside diphosphate-linked moiety X motif 19 OS=Homo sapiens OX=9606 GN=NUDT19 PE=1 SV=1	15	4	5	4	42.2	0.904	1.168	1.047	0.955	1.176	0.964	0.987	1.18	1.256	464.2	419.8	542.1	486.3	443.2	545.9	447.4	458.1	547.8	583.1	0.869	0.363381	0.938	0.0256	0.978191	0.998
A9UHW6	MIF4GD	MIF4G domain-containing protein OS=Homo sapiens OX=9606 GN=MIF4GD PE=1 SV=1	6	1	2	1	25.4	1.074	1.06	1.031	0.846	1.069	0.892	1.017	1.105	0.863	442.1	474.7	468.8	455.9	373.9	472.6	394.3	449.6	488.4	381.4	-0.657	0.454659	0.948	-1.35	0.142248	0.993
B2RBV5		Putative MORF4 family-associated protein 1-like protein UPP OS=Homo sapiens OX=9606 PE=1 SV=1	7	1	1	1	13.4	1.083	0.872	0.992	0.968	0.97	0.985	1.093	1.01	0.702	211.5	229	184.4	209.7	204.6	205.1	208.3	231.1	213.6	148.5	-0.253	0.787224	0.966	-0.132	0.887443	0.998
B5MD39	GGTLC3	Putative glutathione hydrolase light chain 3 OS=Homo sapiens OX=9606 GN=GGTLC3 PE=5 SV=1	11	2	2	2	24.1	1.621	3.171	0.639	1.44	1.142	1.034	0.96	0.324	0.509	250.8	406.5	795.2	160.4	361.2	286.4	259.3	240.8	81.1	127.7	-4.3	0.03195	0.607	-0.134	0.939877	0.998
B7ZAP0	RABGAP1L	Rab GTPase-activating protein 1-like, isoform 10 OS=Homo sapiens OX=9606 GN=RABGAP1L PE=1 SV=1	10	2	3	1	29	1.146	1.084	0.914	1.111	1.048	1.1	0.934	0.817	0.76	788.8	904.3	854.8	721.2	876.4	826.9	867.4	736.8	644.5	599.4	-2.1	0.0172777	0.429	0.666	0.387648	0.996
B9A064	IGLL5	Immunoglobulin lambda-like polypeptide 5 OS=Homo sapiens OX=9606 GN=IGLL5 PE=2 SV=2	11	2	2	1	23	1.076	0.926	0.929	0.927	0.891	0.882	1.195	0.891	1.345	469.2	504.8	434.4	436.1	435.1	418.2	413.8	560.9	418.1	631.2	1.2	0.238469	0.915	-0.969	0.333905	0.996
C9JI98	TMEM238	Transmembrane protein 238 OS=Homo sapiens OX=9606 GN=TMEM238 PE=1 SV=1	10	1	1	1	18	0.92	0.834	0.775	1.408	0.983	1.141	1.021	1.085	0.84	114.3	105.1	95.3	88.6	160.9	112.4	130.4	116.7	123.9	96	1.43	0.141251	0.872	3.08	0.00623343	0.917
E9PQ53	NDUFC2-KCTD14	NADH dehydrogenase [ubiquinone] 1 subunit C2, isoform 2 OS=Homo sapiens OX=9606 GN=NDUFC2-KCTD14 PE=1 SV=1	13	2	2	2	13.4	1.069	1.264	1.125	1.049	0.928	0.987	0.937	0.898	0.991	447.2	478	565.4	503.2	469	415.2	441.5	419.2	401.4	443.1	-2.2	0.00469852	0.197	-1.44	0.0394484	0.982
E9PRG8	C11orf98	Uncharacterized protein C11orf98 OS=Homo sapiens OX=9606 GN=C11orf98 PE=4 SV=2	21	2	3	2	14.2	1.022	1.129	0.969	1.076	1.286	1.155	1.291	0.864	1.127	527.5	539.3	595.4	510.9	567.7	678.4	609.2	681	456	594.4	0.273	0.785624	0.966	1.38	0.187987	0.994
L0R6Q1	SLC35A4	SLC35A4 upstream open reading frame protein OS=Homo sapiens OX=9606 GN=SLC35A4 PE=3 SV=1	17	2	4	2	11.1	1.087	1.028	0.999	1.031	0.98	0.947	1.047	1.003	0.909	227.1	246.7	233.4	226.8	234.1	222.4	214.9	237.7	227.7	206.4	-0.608	0.361915	0.938	-0.531	0.423302	0.996
L0R8F8	MIEF1	MIEF1 upstream open reading frame protein OS=Homo sapiens OX=9606 GN=MIEF1 PE=1 SV=1	21	2	2	2	8.4	1.022	1.013	1.108	1.055	0.921	0.845	1.09	1.072	1.12	362.8	370.6	367.6	402.1	382.8	334	306.6	395.3	388.7	406.3	0.429	0.541912	0.955	-1.13	0.126607	0.992
O00115	DNASE2	Deoxyribonuclease-2-alpha OS=Homo sapiens OX=9606 GN=DNASE2 PE=1 SV=2	7	3	3	3	39.6	0.949	1.168	1.055	1.055	1.216	1.185	0.837	0.939	0.899	290.3	275.5	339	306.1	306.3	353.1	344	243	272.4	260.9	-1.78	0.0253947	0.544	1.15	0.120462	0.992
O00116	AGPS	Alkyldihydroxyacetonephosphate synthase, peroxisomal OS=Homo sapiens OX=9606 GN=AGPS PE=1 SV=1	4	2	2	2	72.9	0.844	0.893	1.197	0.794	0.927	0.86	0.898	1.337	1.274	345.2	291.4	308.4	413.2	274.2	320	296.9	310	461.4	439.7	1.42	0.231564	0.913	-1.18	0.317284	0.996
O00139	KIF2A	Kinesin-like protein KIF2A OS=Homo sapiens OX=9606 GN=KIF2A PE=1 SV=3	16	8	9	7	79.9	1.003	0.945	0.943	0.93	1.069	1.006	1.094	1.077	1.185	828.4	830.5	783.1	780.9	770.4	885.6	833.8	906	892.3	981.6	1.56	0.0282491	0.574	0.494	0.436718	0.996
O00148	DDX39A	ATP-dependent RNA helicase DDX39A OS=Homo sapiens OX=9606 GN=DDX39A PE=1 SV=2	32	12	23	5	49.1	1.065	0.932	0.829	1.054	1.174	1.092	1.01	1.026	0.903	623.6	663.9	581.1	517	657.6	732.1	680.8	629.8	640	562.9	0.287	0.707672	0.963	1.83	0.0333809	0.98
O00151	PDLIM1	PDZ and LIM domain protein 1 OS=Homo sapiens OX=9606 GN=PDLIM1 PE=1 SV=4	16	3	3	3	36	0.928	0.838	0.954	0.723	0.576	0.674	0.843	1.211	1.414	315.5	292.8	264.5	300.9	228	181.6	212.7	266	382.1	446	1.88	0.0801537	0.801	-1.78	0.0951758	0.99
O00154	ACOT7	Cytosolic acyl coenzyme A thioester hydrolase OS=Homo sapiens OX=9606 GN=ACOT7 PE=1 SV=3	29	9	18	9	41.8	1.144	0.941	0.971	0.943	1.061	1.022	0.97	0.888	0.964	2295.6	2625.3	2160.2	2228.7	2165.5	2435.3	2345.1	2226.1	2039.2	2213.1	-0.955	0.227132	0.911	-0.00699	0.992676	0.998
O00159	MYO1C	Unconventional myosin-Ic OS=Homo sapiens OX=9606 GN=MYO1C PE=1 SV=4	24	22	36	22	121.6	0.998	1.036	0.874	1.115	1.069	1.086	1.111	0.916	0.836	5327.7	5315.7	5521.4	4655.7	5940.5	5696	5787	5918.4	4882.5	4452.8	-0.125	0.88352	0.969	1.53	0.0967136	0.991
O00165	HAX1	HCLS1-associated protein X-1 OS=Homo sapiens OX=9606 GN=HAX1 PE=1 SV=2	14	4	4	4	31.6	1.147	1.129	0.808	1.02	1.152	0.97	1.029	0.998	1.106	595.9	683.3	672.6	481.7	607.8	686.6	577.8	613.2	595	658.9	0.0511	0.957263	0.971	0.254	0.790562	0.997
O00170	AIP	AH receptor-interacting protein OS=Homo sapiens OX=9606 GN=AIP PE=1 SV=2	32	8	11	8	37.6	1.017	1.005	0.925	0.925	1.052	0.957	1.058	1.055	1.054	1307.8	1329.4	1314.9	1210.2	1209.5	1376	1252.1	1384	1379	1378.9	0.771	0.238863	0.915	-0.0392	0.950495	0.998
O00178	GTPBP1	GTP-binding protein 1 OS=Homo sapiens OX=9606 GN=GTPBP1 PE=1 SV=3	10	5	6	5	72.4	1.023	1.101	1.027	1.04	1.154	1.058	1.072	1.019	1.014	827.4	846.6	911.3	849.8	860.5	954.7	875.2	886.9	843.3	839.1	-0.196	0.736873	0.964	0.531	0.370394	0.996
O00186	STXBP3	Syntaxin-binding protein 3 OS=Homo sapiens OX=9606 GN=STXBP3 PE=1 SV=2	18	11	14	11	67.7	0.922	1.003	1.164	0.815	0.904	0.806	0.83	1.104	1.165	2010.9	1854.2	2017.1	2341.6	1638.4	1818.6	1621.5	1668.1	2220.4	2342.8	-0.0489	0.958868	0.971	-1.92	0.064325	0.987
O00189	AP4M1	AP-4 complex subunit mu-1 OS=Homo sapiens OX=9606 GN=AP4M1 PE=1 SV=2	3	1	2	1	49.9	0.948	0.965	1.052	0.909	0.977	0.857	0.997	1.072	1.097	45.5	43.1	43.9	47.9	41.4	44.5	39	45.4	48.8	49.9	0.677	0.272998	0.923	-0.834	0.183713	0.994
O00192	ARVCF	Armadillo repeat protein deleted in velo-cardio-facial syndrome OS=Homo sapiens OX=9606 GN=ARVCF PE=1 SV=1	3	2	2	2	104.6	1.028	1.225	1.195	1.061	1.112	0.877	1.152	1.117	1.055	66.3	68.2	81.2	79.2	70.3	73.7	58.1	76.4	74	69.9	-0.249	0.761167	0.965	-1.06	0.213433	0.994
O00193	SMAP	Small acidic protein OS=Homo sapiens OX=9606 GN=SMAP PE=1 SV=1	25	3	3	3	20.3	0.949	0.459	0.861	1.124	0.379	1.2	1.155	1.078	1.071	372	353.2	170.8	320.4	418	141.1	446.3	429.6	401.1	398.3	2.79	0.0628739	0.76	1.77	0.213562	0.994
O00214	LGALS8	Galectin-8 OS=Homo sapiens OX=9606 GN=LGALS8 PE=1 SV=4	6	2	2	2	35.8	1.018	1.088	1.086	0.894	1.165	1.09	1.021	1.148	1.067	286.6	291.7	311.7	311.3	256.2	334	312.3	292.5	329.2	305.8	0.0738	0.928121	0.97	-0.145	0.859401	0.998
O00217	NDUFS8	NADH dehydrogenase [ubiquinone] iron-sulfur protein 8, mitochondrial OS=Homo sapiens OX=9606 GN=NDUFS8 PE=1 SV=1	18	4	5	4	23.7	1.082	1.122	1.137	0.977	0.971	0.883	0.888	0.903	0.968	1023.7	1108.1	1149	1164.2	1000.3	994.1	904.4	909.2	924.7	990.4	-2.24	0.00172943	0.0745	-1.84	0.0061134	0.916
O00231	PSMD11	26S proteasome non-ATPase regulatory subunit 11 OS=Homo sapiens OX=9606 GN=PSMD11 PE=1 SV=3	32	13	20	13	47.4	1.044	1.066	1.016	0.986	1.015	1.018	1.011	1.068	1.038	3148.1	3286.9	3355.9	3199.8	3102.9	3196.8	3204.2	3181.7	3362.1	3266.1	-0.112	0.824038	0.967	-0.299	0.556656	0.997
O00232	PSMD12	26S proteasome non-ATPase regulatory subunit 12 OS=Homo sapiens OX=9606 GN=PSMD12 PE=1 SV=3	32	14	21	14	52.9	0.977	0.976	0.993	0.944	0.947	0.935	0.933	0.983	0.993	2944.4	2877.5	2874.7	2922.7	2778	2789	2752.2	2747.7	2894.3	2922.8	-0.272	0.575318	0.957	-0.474	0.335815	0.996
O00233	PSMD9	26S proteasome non-ATPase regulatory subunit 9 OS=Homo sapiens OX=9606 GN=PSMD9 PE=1 SV=3	34	7	11	7	24.7	1.055	1.353	1.001	1.022	1.057	1.017	1.07	0.876	0.86	2268.1	2392.2	3069.6	2269.3	2317.7	2396.4	2307.7	2426.3	1987.2	1949.9	-1.69	0.0712988	0.782	-0.514	0.554347	0.997
O00244	ATOX1	Copper transport protein ATOX1 OS=Homo sapiens OX=9606 GN=ATOX1 PE=1 SV=1	24	2	2	2	7.4	0.792	0.629	0.956	0.747	0.841	0.756	0.714	0.782	0.862	732.2	579.9	460.7	699.6	547.3	616.1	553.2	522.4	572.5	631.3	-0.291	0.662866	0.961	-0.391	0.559546	0.997
O00257	CBX4	E3 SUMO-protein ligase CBX4 OS=Homo sapiens OX=9606 GN=CBX4 PE=1 SV=3	16	7	8	7	61.3	1.141	1.019	0.857	1.138	1.117	1.144	1.187	0.986	0.947	1064.6	1214.3	1085	911.8	1211.6	1189.3	1217.8	1263.5	1049.8	1008.2	0.207	0.824438	0.967	1.49	0.13187	0.992
O00264	PGRMC1	Membrane-associated progesterone receptor component 1 OS=Homo sapiens OX=9606 GN=PGRMC1 PE=1 SV=3	26	4	5	3	21.7	0.87	0.956	1.088	0.872	0.907	0.824	0.925	1.123	1.205	396.9	345.2	379.5	432	346	359.9	326.9	367.3	445.6	478.3	0.974	0.257026	0.92	-1.15	0.186582	0.994
O00268	TAF4	Transcription initiation factor TFIID subunit 4 OS=Homo sapiens OX=9606 GN=TAF4 PE=1 SV=2	5	5	5	5	110	0.988	0.989	0.962	0.969	1	0.883	0.982	0.984	1.065	259.2	256.2	256.4	249.4	251.3	259.1	229	254.4	255.1	276	0.23	0.687601	0.962	-0.302	0.598837	0.997
O00273	DFFA	DNA fragmentation factor subunit alpha OS=Homo sapiens OX=9606 GN=DFFA PE=1 SV=1	31	8	11	8	36.5	0.977	1.009	1.087	0.866	0.902	0.873	0.899	1.018	1.057	2278.3	2226.8	2297.9	2477.5	1973.8	2054.6	1988	2048.9	2319.3	2407.6	-0.511	0.412594	0.944	-1.65	0.0199534	0.97
O00291	HIP1	Huntingtin-interacting protein 1 OS=Homo sapiens OX=9606 GN=HIP1 PE=1 SV=5	9	7	8	7	116.1	0.756	0.873	1.294	0.549	0.632	0.577	0.777	1.367	1.577	997.7	753.8	870.8	1291	548	630.3	575.7	775.3	1363.4	1573.5	1.56	0.306069	0.93	-2.65	0.0963137	0.991
O00299	CLIC1	Chloride intracellular channel protein 1 OS=Homo sapiens OX=9606 GN=CLIC1 PE=1 SV=4	51	9	30	9	26.9	1.139	1.063	0.942	1.104	1.16	1.14	1.111	0.833	0.751	3305.4	3763.7	3514.3	3112.2	3650.6	3834.5	3769.4	3672.6	2752.6	2483.8	-1.34	0.189029	0.898	1.08	0.28146	0.995
O00303	EIF3F	Eukaryotic translation initiation factor 3 subunit F OS=Homo sapiens OX=9606 GN=EIF3F PE=1 SV=1	31	10	19	10	37.5	1.005	1.01	0.966	0.918	0.977	0.959	0.978	0.973	0.956	2377.7	2390.1	2402	2297.8	2183.2	2322.7	2280.9	2325.5	2313.7	2273.9	-0.379	0.475159	0.95	-0.493	0.356753	0.996
O00308	WWP2	NEDD4-like E3 ubiquitin-protein ligase WWP2 OS=Homo sapiens OX=9606 GN=WWP2 PE=1 SV=2	3	2	3	2	98.9	1.067	0.97	0.919	1.081	1.111	0.94	1.068	1.069	1.039	135.2	144.3	131.1	124.3	146.2	150.2	127.1	144.4	144.6	140.5	0.755	0.312915	0.931	0.735	0.325632	0.996
O00321	ETV2	ETS translocation variant 2 OS=Homo sapiens OX=9606 GN=ETV2 PE=2 SV=2	2	1	1	1	36.6	0.489	0.986	0.697	0.552	0.849	0.535	3.973	1.992	5.55	145	70.9	143	101.1	80	123.1	77.6	576.1	288.8	804.8	7.26	1.25083e-05	1.51e-07	-0.732	0.445267	0.996
O00330	PDHX	Pyruvate dehydrogenase protein X component, mitochondrial OS=Homo sapiens OX=9606 GN=PDHX PE=1 SV=3	18	9	15	9	54.1	0.977	1.089	0.997	0.944	1.078	0.913	0.891	0.948	1.078	2447.6	2391.7	2665.3	2440.7	2309.5	2639.2	2235.1	2179.6	2321.2	2637.6	-0.69	0.37512	0.94	-0.425	0.58044	0.997
O00391	QSOX1	Sulfhydryl oxidase 1 OS=Homo sapiens OX=9606 GN=QSOX1 PE=1 SV=3	3	1	1	1	82.5	1.045	1.52	1.254	0.854	1.113	0.94	1.172	1.084	1.281	38.7	40.5	58.9	48.6	33.1	43.1	36.4	45.4	42	49.6	-0.323	0.720689	0.963	-2.24	0.0288421	0.977
O00399	DCTN6	Dynactin subunit 6 OS=Homo sapiens OX=9606 GN=DCTN6 PE=1 SV=1	5	1	2	1	20.7	1.024	1.067	1.065	0.89	0.951	0.885	0.962	1.015	0.991	680.2	696.3	725.5	724.7	605.7	647.1	601.7	654.2	690.5	674.3	-0.827	0.127149	0.861	-1.68	0.00690978	0.925
O00401	WASL	Neural Wiskott-Aldrich syndrome protein OS=Homo sapiens OX=9606 GN=WASL PE=1 SV=2	13	5	8	5	54.8	1.121	0.988	0.986	1.173	1.099	1.083	1.095	0.985	1.078	927.2	1039.4	915.7	914.5	1088	1018.7	1003.7	1014.9	913.5	999.5	0.143	0.832767	0.967	1.09	0.129459	0.992
O00410	IPO5	Importin-5 OS=Homo sapiens OX=9606 GN=IPO5 PE=1 SV=4	26	22	36	21	123.6	0.965	0.724	0.944	0.917	0.823	0.962	0.91	1.145	0.944	5935.1	5724.7	4296.7	5603.7	5445.1	4884.3	5709.6	5401.1	6798	5601.4	0.962	0.255897	0.919	0.0234	0.977178	0.998
O00411	POLRMT	DNA-directed RNA polymerase, mitochondrial OS=Homo sapiens OX=9606 GN=POLRMT PE=1 SV=2	5	5	5	5	138.5	1.005	0.967	1.058	1.108	1.009	1.017	1.069	1.043	1.05	476.6	478.9	461	504.3	528	480.8	484.7	509.6	497.1	500.2	0.439	0.447711	0.947	0.551	0.344852	0.996
O00418	EEF2K	Eukaryotic elongation factor 2 kinase OS=Homo sapiens OX=9606 GN=EEF2K PE=1 SV=2	6	4	4	4	82.1	1.043	0.954	0.902	1.18	0.985	1.043	1.091	0.986	1.103	483.4	504.4	461.2	435.9	570.2	476	504.2	527.4	476.7	533.1	0.909	0.247776	0.917	1.21	0.132993	0.992
O00422	SAP18	Histone deacetylase complex subunit SAP18 OS=Homo sapiens OX=9606 GN=SAP18 PE=1 SV=1	37	7	9	7	17.6	1.099	1.01	1.002	1.056	1.059	1.017	1.093	1.006	1.012	1857.5	2040.7	1876.8	1861.1	1961.6	1967.9	1889.9	2030.5	1869.2	1879.6	-0.0769	0.900488	0.969	0.252	0.682976	0.997
O00423	EML1	Echinoderm microtubule-associated protein-like 1 OS=Homo sapiens OX=9606 GN=EML1 PE=1 SV=3	1	1	1	1	89.8	0.75	1.402	1.865	0.878	0.992	0.69	0.892	1.124	1.024	72.9	54.7	102.2	136	64.1	72.4	50.3	65.1	82	74.7	-1.35	0.366505	0.939	-2.74	0.0839591	0.99
O00425	IGF2BP3	Insulin-like growth factor 2 mRNA-binding protein 3 OS=Homo sapiens OX=9606 GN=IGF2BP3 PE=1 SV=2	26	13	21	10	63.7	0.902	1.126	0.975	1.078	1.113	1.008	1.08	1.045	1.115	2641.1	2381.6	2973.6	2575.2	2846.6	2940	2661.6	2851.7	2759.1	2944.9	0.925	0.206249	0.905	1.03	0.164264	0.993
O00429	DNM1L	Dynamin-1-like protein OS=Homo sapiens OX=9606 GN=DNM1L PE=1 SV=2	33	22	29	22	81.8	0.926	1.013	1	1.011	1.068	1.058	1.001	1.004	1.029	5842.9	5410.7	5919.5	5842.5	5906.5	6237.8	6179.5	5846.4	5866	6010.9	0.316	0.561811	0.956	0.967	0.0964026	0.991
O00442	RTCA	RNA 3'-terminal phosphate cyclase OS=Homo sapiens OX=9606 GN=RTCA PE=1 SV=1	14	5	7	5	39.3	0.91	1.113	1.075	0.917	1.031	0.96	0.942	1.026	1.148	797.4	725.5	887.2	857.5	731	822	765.4	751.5	818.5	915.4	-0.0527	0.947188	0.97	-0.593	0.461976	0.996
O00443	PIK3C2A	Phosphatidylinositol 4-phosphate 3-kinase C2 domain-containing subunit alpha OS=Homo sapiens OX=9606 GN=PIK3C2A PE=1 SV=2	3	5	6	5	190.6	0.945	0.959	1.047	1.056	1.044	1.105	1.004	0.89	0.955	731	690.7	701	765	772.2	762.9	807.8	733.8	650.6	698	-0.406	0.51449	0.953	1.18	0.0783593	0.989
O00444	PLK4	Serine/threonine-protein kinase PLK4 OS=Homo sapiens OX=9606 GN=PLK4 PE=1 SV=3	1	1	1	1	108.9	1.263	1.041	0.955	0.914	0.993	1.043	1.177	1.026	1.249	36.1	45.5	37.5	34.4	33	35.8	37.6	42.4	37	45	0.563	0.532432	0.954	-0.868	0.341996	0.996
O00459	PIK3R2	Phosphatidylinositol 3-kinase regulatory subunit beta OS=Homo sapiens OX=9606 GN=PIK3R2 PE=1 SV=2	11	5	6	3	81.5	1.277	1.291	1.073	0.98	0.974	0.94	1.226	0.913	1.083	102	130.2	131.7	109.4	100	99.3	95.8	125.1	93.1	110.4	-1.22	0.178621	0.893	-2.17	0.0272308	0.976
O00461	GOLIM4	Golgi integral membrane protein 4 OS=Homo sapiens OX=9606 GN=GOLIM4 PE=1 SV=1	7	4	5	4	81.8	0.579	0.376	0.722	0.958	0.387	0.965	0.886	1.301	1.594	376.1	217.6	141.2	271.7	360.1	145.6	363.1	333.1	489.4	599.4	4.26	0.00482352	0.201	1.45	0.250889	0.995
O00462	MANBA	Beta-mannosidase OS=Homo sapiens OX=9606 GN=MANBA PE=1 SV=3	4	3	3	2	100.8	0.605	0.978	0.9	0.821	0.874	0.807	0.862	0.938	1.165	70	42.4	68.5	63	57.5	61.1	56.5	60.3	65.7	81.6	1.06	0.258903	0.92	-0.335	0.714386	0.997
O00468	AGRN	Agrin OS=Homo sapiens OX=9606 GN=AGRN PE=1 SV=6	1	2	2	2	217.2	0.837	0.803	0.972	0.933	0.764	0.675	0.718	0.848	0.913	81.3	68	65.3	79	75.8	62.1	54.9	58.4	68.9	74.3	-0.458	0.523832	0.953	-0.631	0.384204	0.996
O00471	EXOC5	Exocyst complex component 5 OS=Homo sapiens OX=9606 GN=EXOC5 PE=1 SV=1	5	3	3	3	81.8	1.034	0.988	0.938	0.878	1.009	1.184	0.944	1.054	0.978	120.7	124.9	119.3	113.3	106.1	121.8	142.9	114	127.3	118.1	-0.0732	0.933115	0.97	0.359	0.682032	0.997
O00483	NDUFA4	Cytochrome c oxidase subunit NDUFA4 OS=Homo sapiens OX=9606 GN=NDUFA4 PE=1 SV=1	31	3	8	3	9.4	1.115	1.052	1.077	1.021	0.915	0.917	0.956	0.919	0.937	1652.2	1841.5	1738.8	1778.8	1686.8	1511.3	1515.7	1579	1518.4	1548.1	-1.74	0.0117126	0.365	-1.44	0.028461	0.977
O00487	PSMD14	26S proteasome non-ATPase regulatory subunit 14 OS=Homo sapiens OX=9606 GN=PSMD14 PE=1 SV=1	20	5	7	5	34.6	1.046	1.013	0.993	0.941	1.023	0.942	0.984	0.963	0.983	2014.2	2106.3	2040	2000.6	1894.7	2061.5	1896.8	1982.2	1939.2	1979.1	-0.595	0.298999	0.928	-0.566	0.321636	0.996
O00488	ZNF593	Zinc finger protein 593 OS=Homo sapiens OX=9606 GN=ZNF593 PE=1 SV=2	10	1	1	1	15.2	0.995	1.051	0.915	1.119	1.069	0.737	1.373	1.13	1.284	61	60.7	64.1	55.8	68.3	65.2	44.9	83.7	68.9	78.3	2.21	0.0487628	0.709	0.163	0.872194	0.998
O00505	KPNA3	Importin subunit alpha-4 OS=Homo sapiens OX=9606 GN=KPNA3 PE=1 SV=2	9	4	5	2	57.8	0.925	0.762	1.022	0.911	0.856	0.947	0.811	1.125	0.999	434.5	402.1	331.3	444.1	395.9	372.1	411.3	352.6	488.9	434.2	0.587	0.511368	0.952	-0.182	0.836935	0.998
O00515	LAD1	Ladinin-1 OS=Homo sapiens OX=9606 GN=LAD1 PE=1 SV=2	23	11	12	11	57.1	0.529	0.935	1.609	0.498	0.426	0.361	0.572	1.485	1.987	1686.1	891.9	1576.8	2712.9	839.2	717.4	609	964.7	2503.5	3349.6	1.42	0.467718	0.949	-3.33	0.106147	0.991
O00541	PES1	Pescadillo homolog OS=Homo sapiens OX=9606 GN=PES1 PE=1 SV=1	11	5	5	5	68	1.054	1.068	1.045	1.178	1.191	1.165	1.079	1.145	1.148	294.8	310.6	314.9	307.9	347.3	351.1	343.3	318	337.5	338.5	0.584	0.235757	0.914	1.27	0.0202553	0.97
O00562	PITPNM1	Membrane-associated phosphatidylinositol transfer protein 1 OS=Homo sapiens OX=9606 GN=PITPNM1 PE=1 SV=4	1	1	1	1	134.8	0.816	1.264	1.313	0.846	0.958	0.964	0.802	1.259	1.338	89.5	73.1	113.2	117.5	75.7	85.7	86.3	71.8	112.7	119.7	-0.061	0.965057	0.971	-1.69	0.242238	0.995
O00567	NOP56	Nucleolar protein 56 OS=Homo sapiens OX=9606 GN=NOP56 PE=1 SV=4	15	7	10	7	66	0.888	0.842	1	1.005	0.888	1.042	0.938	1.078	1.024	2310.3	2050.7	1945.9	2310.4	2322.4	2050.8	2407	2166.6	2491.2	2365.3	0.992	0.192418	0.899	0.834	0.267293	0.995
O00571	DDX3X	ATP-dependent RNA helicase DDX3X OS=Homo sapiens OX=9606 GN=DDX3X PE=1 SV=3	32	20	36	4	73.2	0.915	0.964	0.971	1.021	0.939	0.944	1.003	1.071	0.968	651.3	595.9	628.2	632.8	664.9	611.4	614.9	653.5	697.7	630.4	0.723	0.229919	0.912	0.299	0.608064	0.997
O00584	RNASET2	Ribonuclease T2 OS=Homo sapiens OX=9606 GN=RNASET2 PE=1 SV=2	7	2	5	2	29.5	1.067	1.222	0.995	1.12	1.007	1.166	1.066	0.908	0.947	970.4	1035.1	1186	965.8	1086.6	977.3	1131.5	1034	881	919.2	-1.2	0.158563	0.883	0.316	0.696218	0.997
O00625	PIR	Pirin OS=Homo sapiens OX=9606 GN=PIR PE=1 SV=1	18	5	7	5	32.1	1.002	0.915	1.231	0.787	0.872	0.802	0.92	1.165	1.081	1010.2	1012.5	924.5	1243.6	795.3	881	810.5	929.9	1177	1092.2	0.0132	0.987816	0.971	-2.28	0.0223875	0.973
O00629	KPNA4	Importin subunit alpha-3 OS=Homo sapiens OX=9606 GN=KPNA4 PE=1 SV=1	17	6	7	4	57.9	0.87	0.938	1.035	0.972	0.896	0.953	0.952	0.967	0.914	666.3	579.6	625	689.9	647.6	597.2	635.2	634.5	644.4	608.9	-0.121	0.843519	0.968	-0.0721	0.906414	0.998
O00712	NFIB	Nuclear factor 1 B-type OS=Homo sapiens OX=9606 GN=NFIB PE=1 SV=2	12	4	5	3	47.4	1.072	0.593	0.708	1.422	1.4	1.337	1.305	0.601	1.028	225.9	242.3	134.1	160	321.4	316.2	302.2	294.9	135.7	232.2	1.33	0.344922	0.936	4.31	0.00906059	0.941
O00743	PPP6C	Serine/threonine-protein phosphatase 6 catalytic subunit OS=Homo sapiens OX=9606 GN=PPP6C PE=1 SV=1	20	5	7	5	35.1	1.023	1.033	0.974	1.028	1.055	1.042	0.977	0.918	0.892	1416.1	1449	1462.6	1379.4	1456.2	1494.2	1475.3	1383.2	1299.4	1262.9	-0.972	0.0955762	0.826	0.539	0.33227	0.996
O00754	MAN2B1	Lysosomal alpha-mannosidase OS=Homo sapiens OX=9606 GN=MAN2B1 PE=1 SV=3	6	6	6	6	113.7	0.821	1.287	1.026	1.108	1.042	1.075	0.976	0.951	1.035	929.3	763.4	1196.2	953.4	1029.3	968.3	999.4	906.7	883.4	962.1	-0.44	0.634404	0.96	0.881	0.349703	0.996
O00762	UBE2C	Ubiquitin-conjugating enzyme E2 C OS=Homo sapiens OX=9606 GN=UBE2C PE=1 SV=1	20	3	3	3	19.6	1.022	0.857	0.92	0.998	0.954	1.027	0.957	0.828	1	337.4	344.9	289.3	310.3	336.7	321.9	346.4	323	279.2	337.4	-0.182	0.793678	0.966	0.688	0.334303	0.996
O00764	PDXK	Pyridoxal kinase OS=Homo sapiens OX=9606 GN=PDXK PE=1 SV=1	12	3	3	3	35.1	0.922	1.046	1.002	1.001	1.102	0.941	0.981	1.035	0.926	406.7	374.9	425.4	407.6	407.1	448.2	382.8	398.9	420.8	376.7	-0.105	0.878976	0.969	0.399	0.565969	0.997
O14523	C2CD2L	Phospholipid transfer protein C2CD2L OS=Homo sapiens OX=9606 GN=C2CD2L PE=1 SV=3	4	1	1	1	76.1	0.986	1.178	1.17	1.132	1.047	1.08	1.186	1.24	1.113	67.7	66.7	79.7	79.2	76.6	70.9	73.1	80.2	83.9	75.3	0.637	0.348684	0.936	0.146	0.826325	0.998
O14530	TXNDC9	Thioredoxin domain-containing protein 9 OS=Homo sapiens OX=9606 GN=TXNDC9 PE=1 SV=2	18	3	3	3	26.5	1.113	1.07	0.974	1.08	1.029	0.986	1.102	1.05	1.056	589.2	655.9	630.7	574.2	636.3	606.6	581	649.5	618.6	622.1	0.147	0.818976	0.967	-0.0546	0.932233	0.998
O14545	TRAFD1	TRAF-type zinc finger domain-containing protein 1 OS=Homo sapiens OX=9606 GN=TRAFD1 PE=1 SV=1	13	6	10	6	64.8	0.969	1.113	1.008	1.011	1.022	0.94	1.046	1.047	1.121	1376.3	1333.5	1531.7	1387.9	1391.4	1406.7	1294	1439.6	1441	1542.9	0.45	0.458107	0.948	-0.277	0.644595	0.997
O14558	HSPB6	Heat shock protein beta-6 OS=Homo sapiens OX=9606 GN=HSPB6 PE=1 SV=2	23	3	5	3	17.1	0.876	0.779	1.362	0.822	0.974	0.85	0.995	1.489	0.866	801.8	702.6	625	1091.9	658.9	781.3	681.4	798.1	1194	694.2	0.825	0.549724	0.955	-1.02	0.460668	0.996
O14561	NDUFAB1	Acyl carrier protein, mitochondrial OS=Homo sapiens OX=9606 GN=NDUFAB1 PE=1 SV=3	10	1	1	1	17.4	0.743	0.747	0.63	1.001	0.88	0.877	0.719	1.455	1.09	26.5	19.7	19.8	16.7	26.5	23.3	23.2	19	38.5	28.8	2.76	0.0359712	0.638	1.52	0.213124	0.994
O14562	UBFD1	Ubiquitin domain-containing protein UBFD1 OS=Homo sapiens OX=9606 GN=UBFD1 PE=1 SV=2	16	4	6	4	33.4	0.947	1.05	1.135	0.848	0.867	0.817	1.02	1.079	1.414	1132.6	1072.4	1189.2	1285.2	960.7	981.4	925.1	1154.8	1222.3	1601.1	0.826	0.275511	0.924	-2.13	0.0138453	0.959
O14578	CIT	Citron Rho-interacting kinase OS=Homo sapiens OX=9606 GN=CIT PE=1 SV=2	2	4	4	4	231.3	0.859	0.739	0.858	1.221	0.832	1.309	1.025	0.958	0.933	376.3	323.1	278.1	322.9	459.3	313.1	492.7	385.8	360.3	351	1.39	0.207889	0.905	2.79	0.022436	0.973
O14579	COPE	Coatomer subunit epsilon OS=Homo sapiens OX=9606 GN=COPE PE=1 SV=3	33	7	12	7	34.5	0.977	1.118	1.004	0.906	1.015	0.936	1.001	0.965	1.078	1548.4	1512.2	1731.8	1555.3	1402.8	1571.9	1450.1	1549.8	1494.2	1669	-0.251	0.704905	0.963	-0.84	0.22134	0.994
O14618	CCS	Copper chaperone for superoxide dismutase OS=Homo sapiens OX=9606 GN=CCS PE=1 SV=1	24	5	5	5	29	0.827	0.93	1.145	0.858	0.941	0.812	0.822	1.212	1.146	534.9	442.4	497.6	612.5	459.1	503.2	434.4	440	648.2	613.2	0.771	0.490441	0.951	-1.04	0.355392	0.996
O14641	DVL2	Segment polarity protein dishevelled homolog DVL-2 OS=Homo sapiens OX=9606 GN=DVL2 PE=1 SV=1	10	5	5	5	78.9	0.987	0.957	1.081	0.99	1.001	0.854	0.963	1.095	1.082	279.9	276.1	268	302.5	276.9	280.1	239	269.6	306.6	302.8	0.301	0.660833	0.961	-0.617	0.376747	0.996
O14656	TOR1A	Torsin-1A OS=Homo sapiens OX=9606 GN=TOR1A PE=1 SV=1	7	2	2	2	37.8	0.896	1.13	1.167	0.84	0.864	0.802	0.87	1.206	1.21	142.3	127.4	160.8	166	119.5	123	114.1	123.8	171.6	172.2	0.115	0.909969	0.97	-2.31	0.0421949	0.983
O14657	TOR1B	Torsin-1B OS=Homo sapiens OX=9606 GN=TOR1B PE=1 SV=2	7	2	2	2	38	0.901	1.115	1.158	0.803	0.854	0.716	0.913	1.284	1.254	407	366.6	453.7	471.4	326.7	347.4	291.6	371.8	522.5	510.4	0.534	0.595139	0.958	-2.56	0.0249544	0.975
O14727	APAF1	Apoptotic protease-activating factor 1 OS=Homo sapiens OX=9606 GN=APAF1 PE=1 SV=2	1	1	1	1	141.7	0.914	0.842	1.295	0.872	1.209	0.98	0.614	0.88	0.852	49.8	45.5	42	64.5	43.4	60.2	48.8	30.6	43.8	42.4	-1.9	0.126457	0.86	0.222	0.849784	0.998
O14730	RIOK3	Serine/threonine-protein kinase RIO3 OS=Homo sapiens OX=9606 GN=RIOK3 PE=1 SV=2	9	3	3	3	59.1	1.154	1.227	1.119	1.09	0.914	0.981	1.015	1.002	1.015	468.8	541	575.1	524.6	511	428.5	459.9	475.7	469.8	476	-1.54	0.0345055	0.627	-1.54	0.0341421	0.98
O14732	IMPA2	Inositol monophosphatase 2 OS=Homo sapiens OX=9606 GN=IMPA2 PE=1 SV=1	7	2	2	2	31.3	1.106	0.97	0.936	1.102	1.1	0.984	0.993	1.102	0.834	423.9	468.7	411.2	396.7	467.1	466.2	417	421	467.3	353.4	-0.263	0.756337	0.965	0.788	0.361032	0.996
O14733	MAP2K7	Dual specificity mitogen-activated protein kinase kinase 7 OS=Homo sapiens OX=9606 GN=MAP2K7 PE=1 SV=2	2	1	1	1	47.5	1.031	1.72	1.468	1.122	1.862	0.878	0.994	0.983	1.068	65.3	67.4	112.4	95.9	73.3	121.7	57.3	65	64.2	69.8	-2.21	0.100194	0.832	-0.894	0.480831	0.997
O14734	ACOT8	Acyl-coenzyme A thioesterase 8 OS=Homo sapiens OX=9606 GN=ACOT8 PE=1 SV=1	18	4	5	4	35.9	0.902	0.948	0.962	0.984	1.002	0.905	0.905	0.97	0.839	105.3	95	99.9	101.3	103.7	105.5	95.3	95.3	102.2	88.3	-0.348	0.548602	0.955	0.371	0.522823	0.997
O14737	PDCD5	Programmed cell death protein 5 OS=Homo sapiens OX=9606 GN=PDCD5 PE=1 SV=3	66	8	16	8	14.3	1.121	1.036	1.074	0.912	0.977	0.947	0.865	0.982	0.911	3390.5	3799.9	3512.8	3643	3093.7	3314.2	3211	2933.5	3329.3	3088.9	-1.88	0.00741828	0.284	-1.52	0.0225677	0.973
O14744	PRMT5	Protein arginine N-methyltransferase 5 OS=Homo sapiens OX=9606 GN=PRMT5 PE=1 SV=4	11	7	10	7	72.6	1.061	1.021	0.962	0.928	0.949	1.025	0.917	0.938	0.974	1098.6	1165.1	1121.2	1057.3	1019.4	1042	1126	1007.6	1030.8	1069.8	-0.989	0.130679	0.864	-0.531	0.397438	0.996
O14745	SLC9A3R1	Na(+)/H(+) exchange regulatory cofactor NHE-RF1 OS=Homo sapiens OX=9606 GN=SLC9A3R1 PE=1 SV=4	14	3	4	3	38.8	1.066	1.13	1.07	0.975	1.113	0.921	1.13	1.146	1.564	324.4	345.6	366.4	347.2	316.4	361.2	298.7	366.6	371.6	507.3	1.02	0.176944	0.893	-0.911	0.223417	0.994
O14757	CHEK1	Serine/threonine-protein kinase Chk1 OS=Homo sapiens OX=9606 GN=CHEK1 PE=1 SV=2	11	5	6	5	54.4	1.072	0.895	0.95	1.055	0.98	0.985	1.037	1.109	1.073	1409	1510.5	1261	1339.3	1486.9	1380.9	1388.1	1460.6	1562.7	1511.3	1.01	0.144716	0.874	0.462	0.485252	0.997
O14771	ZNF213	Zinc finger protein 213 OS=Homo sapiens OX=9606 GN=ZNF213 PE=1 SV=2	3	1	1	1	51.2	1.005	0.955	1.116	1.218	1.178	0.863	1.184	0.944	0.777	11.7	11.8	11.2	13.1	14.3	13.8	10.1	13.9	11.1	9.1	-0.547	0.653993	0.961	0.579	0.635323	0.997
O14773	TPP1	Tripeptidyl-peptidase 1 OS=Homo sapiens OX=9606 GN=TPP1 PE=1 SV=2	8	3	3	3	61.2	0.961	1.135	0.904	1.141	1.199	1.143	1.024	0.934	0.884	434.8	417.7	493.4	393.1	496	521.3	496.9	445.4	406.1	384.3	-0.488	0.519358	0.953	1.9	0.0264404	0.976
O14776	TCERG1	Transcription elongation regulator 1 OS=Homo sapiens OX=9606 GN=TCERG1 PE=1 SV=2	8	8	8	8	123.8	1.145	0.882	0.971	1.127	0.783	1.118	1.14	0.985	1.092	1093.5	1251.6	964.1	1061.3	1232.5	856.2	1222	1246.7	1076.6	1193.9	0.669	0.556756	0.955	0.314	0.780839	0.997
O14777	NDC80	Kinetochore protein NDC80 homolog OS=Homo sapiens OX=9606 GN=NDC80 PE=1 SV=1	11	7	9	7	73.9	1.057	0.804	0.835	1.065	0.951	1.06	1.05	0.968	0.857	926.9	979.5	744.8	774.2	986.8	881.2	982.1	973.5	897.2	793.9	0.469	0.601854	0.958	1.33	0.156699	0.993
O14787	TNPO2	Transportin-2 OS=Homo sapiens OX=9606 GN=TNPO2 PE=1 SV=3	8	7	13	3	101.3	0.789	0.716	1.027	0.865	0.718	0.826	0.925	1.219	1.092	432.3	341.2	309.5	444.1	373.9	310.6	357	399.9	527.1	471.9	1.95	0.0487897	0.709	-0.61	0.498507	0.997
O14795	UNC13B	Protein unc-13 homolog B OS=Homo sapiens OX=9606 GN=UNC13B PE=1 SV=2	4	6	9	6	180.6	0.95	0.793	0.968	1.038	0.965	1.068	0.999	1.277	0.878	690.1	655.3	547	668	716.2	666.1	736.6	689.5	881.5	605.9	1.3	0.16711	0.888	1.39	0.143453	0.993
O14802	POLR3A	DNA-directed RNA polymerase III subunit RPC1 OS=Homo sapiens OX=9606 GN=POLR3A PE=1 SV=2	4	6	6	6	155.5	1.05	1.05	1.1	0.97	1.059	0.896	0.988	1.096	1.064	537.5	564.2	564.6	591.2	521.3	568.9	481.6	531.3	589.3	572	-0.307	0.63004	0.959	-1.01	0.132471	0.992
O14810	CPLX1	Complexin-1 OS=Homo sapiens OX=9606 GN=CPLX1 PE=1 SV=1	15	1	2	1	15	0.845	0.763	1.149	0.729	0.788	0.763	0.861	1.138	1.188	235.9	199.3	180	271	171.9	185.8	180.1	203	268.4	280.3	1.17	0.289317	0.927	-1.54	0.170604	0.993
O14818	PSMA7	Proteasome subunit alpha type-7 OS=Homo sapiens OX=9606 GN=PSMA7 PE=1 SV=1	33	8	13	8	27.9	0.977	1.008	1.004	0.96	1.005	0.931	0.958	1.011	0.951	1960.4	1916.1	1976	1967.4	1882	1970.1	1825.2	1877.6	1981.6	1865	-0.346	0.511132	0.952	-0.323	0.538992	0.997
O14828	SCAMP3	Secretory carrier-associated membrane protein 3 OS=Homo sapiens OX=9606 GN=SCAMP3 PE=1 SV=3	17	3	3	3	38.3	0.853	0.812	0.864	1.074	0.798	1.034	0.987	1.021	1.082	199.3	170	161.9	172.2	214	159	206.1	196.7	203.4	215.8	1.84	0.037773	0.65	1.51	0.0780012	0.989
O14841	OPLAH	5-oxoprolinase OS=Homo sapiens OX=9606 GN=OPLAH PE=1 SV=3	15	14	15	14	137.4	0.714	1.076	0.948	1.083	1.091	0.961	1.146	1.094	1.238	1422.1	1015.1	1529.7	1348.1	1539.6	1551.4	1366.3	1629.5	1556.5	1760.1	2.27	0.0221736	0.504	1.45	0.115486	0.992
O14867	BACH1	Transcription regulator protein BACH1 OS=Homo sapiens OX=9606 GN=BACH1 PE=1 SV=2	1	1	1	1	81.9	0.81	0.799	0.706	1.066	1.083	0.861	0.98	0.867	0.944	47.5	38.5	38	33.6	50.7	51.5	40.9	46.6	41.2	44.9	1.23	0.134204	0.867	2.23	0.014438	0.961
O14874	BCKDK	[3-methyl-2-oxobutanoate dehydrogenase [lipoamide]] kinase, mitochondrial OS=Homo sapiens OX=9606 GN=BCKDK PE=1 SV=2	5	1	1	1	46.3	1.021	1.344	1.141	0.859	1.213	0.93	1.035	1.102	1.195	47.6	48.6	63.9	54.3	40.8	57.7	44.2	49.2	52.4	56.8	-0.329	0.733846	0.964	-1.51	0.140189	0.993
O14893	GEMIN2	Gem-associated protein 2 OS=Homo sapiens OX=9606 GN=GEMIN2 PE=1 SV=1	11	2	2	2	31.6	1.025	1.011	1.236	1.01	1.047	1.059	1.018	1.208	1.148	369.4	378.5	373.5	456.5	373	386.9	391.2	376	446.2	423.9	0.295	0.660666	0.961	-0.228	0.733825	0.997
O14907	TAX1BP3	Tax1-binding protein 3 OS=Homo sapiens OX=9606 GN=TAX1BP3 PE=1 SV=2	14	1	2	1	13.7	0.7	1.056	1.337	0.892	0.87	0.857	0.899	1.046	1.341	513.5	359.7	542.4	686.5	458	446.9	439.9	461.5	537.3	688.8	0.32	0.797242	0.966	-1.62	0.210679	0.994
O14908	GIPC1	PDZ domain-containing protein GIPC1 OS=Homo sapiens OX=9606 GN=GIPC1 PE=1 SV=2	8	2	2	2	36	1.002	0.935	1.03	1.062	0.862	0.89	0.905	1.068	0.937	82	82.2	76.7	84.5	87	70.6	73	74.2	87.5	76.8	-0.339	0.668913	0.961	-0.518	0.516354	0.997
O14910	LIN7A	Protein lin-7 homolog A OS=Homo sapiens OX=9606 GN=LIN7A PE=1 SV=2	17	4	5	2	26	0.918	0.955	0.902	0.877	1.084	1.016	1.19	1.113	1.168	218.2	200.3	208.4	196.8	191.3	236.6	221.7	259.8	242.8	254.9	2.37	0.00733148	0.282	0.87	0.247768	0.995
O14920	IKBKB	Inhibitor of nuclear factor kappa-B kinase subunit beta OS=Homo sapiens OX=9606 GN=IKBKB PE=1 SV=1	2	2	3	2	86.5	1.15	1.195	1.138	1.105	1.056	1.028	1.1	1.04	1.34	120.1	138	143.5	136.6	132.6	126.8	123.4	132.1	124.9	160.9	-0.272	0.658586	0.961	-0.659	0.295552	0.995
O14929	HAT1	Histone acetyltransferase type B catalytic subunit OS=Homo sapiens OX=9606 GN=HAT1 PE=1 SV=1	17	5	9	5	49.5	1.112	1.013	0.954	1	1.03	1.035	1.043	0.965	0.868	1213.8	1350.1	1229.4	1158.4	1214	1250.4	1256.9	1266.1	1171.3	1053	-0.738	0.321478	0.932	0.0937	0.897311	0.998
O14949	UQCRQ	Cytochrome b-c1 complex subunit 8 OS=Homo sapiens OX=9606 GN=UQCRQ PE=1 SV=4	21	2	2	2	9.9	0.911	0.892	1.07	1.146	0.828	0.948	1.026	1.014	1.032	89.9	81.9	80.2	96.2	103	74.5	85.2	92.2	91.2	92.7	0.698	0.447667	0.947	0.284	0.754374	0.997
O14950	MYL12B	Myosin regulatory light chain 12B OS=Homo sapiens OX=9606 GN=MYL12B PE=1 SV=2	34	5	7	5	19.8	0.944	1.075	1.001	1.117	0.988	0.943	1.082	0.95	0.938	683.2	644.7	734.7	684.1	763.5	674.8	644.1	739.2	649.3	641	-0.162	0.839506	0.968	0.255	0.749562	0.997
O14964	HGS	Hepatocyte growth factor-regulated tyrosine kinase substrate OS=Homo sapiens OX=9606 GN=HGS PE=1 SV=1	18	12	16	12	86.1	1.028	1.055	0.983	0.981	1.038	1.123	1.144	0.963	0.934	2003.3	2059.8	2114	1968.5	1964.4	2078.5	2250.4	2291.7	1928.9	1871.7	-0.182	0.820348	0.967	0.381	0.636548	0.997
O14965	AURKA	Aurora kinase A OS=Homo sapiens OX=9606 GN=AURKA PE=1 SV=2	4	1	1	1	45.8	1.092	0.916	0.769	0.93	0.923	1.078	1.046	0.961	0.918	358.4	391.5	328.5	275.7	333.4	330.7	386.5	375	344.5	329	0.302	0.753109	0.965	0.372	0.698473	0.997
O14967	CLGN	Calmegin OS=Homo sapiens OX=9606 GN=CLGN PE=1 SV=1	6	3	3	3	70	0.748	0.969	0.953	0.965	0.82	0.828	0.996	1.345	1.47	108.6	81.3	105.2	103.5	104.8	89.1	89.9	108.2	146.1	159.7	2.86	0.00731685	0.281	-0.277	0.752542	0.997
O14976	GAK	Cyclin-G-associated kinase OS=Homo sapiens OX=9606 GN=GAK PE=1 SV=2	14	14	16	14	143.1	0.997	1.085	1.01	0.985	1.062	0.99	1.03	1.03	1.212	1533.4	1528.4	1663.8	1548.5	1509.7	1628.5	1517.5	1579	1580.1	1857.7	0.466	0.450474	0.948	-0.0716	0.906396	0.998
O14979	HNRNPDL	Heterogeneous nuclear ribonucleoprotein D-like OS=Homo sapiens OX=9606 GN=HNRNPDL PE=1 SV=3	26	9	21	8	46.4	1.056	0.891	1.048	0.825	0.835	0.857	0.913	0.97	0.905	3975.9	4197.3	3541.5	4168.5	3281.6	3319.4	3408.7	3631.8	3858	3599.7	-0.962	0.139892	0.871	-1.82	0.0125401	0.956
O14980	XPO1	Exportin-1 OS=Homo sapiens OX=9606 GN=XPO1 PE=1 SV=1	15	13	19	13	123.3	0.912	0.687	0.95	0.953	0.844	1.017	0.997	1.151	0.976	2349.7	2142.2	1615.4	2232	2239.9	1983.3	2390.5	2343.8	2703.7	2294.1	1.73	0.0462842	0.698	0.744	0.351877	0.996
O14981	BTAF1	TATA-binding protein-associated factor 172 OS=Homo sapiens OX=9606 GN=BTAF1 PE=1 SV=2	4	7	10	7	206.8	1.1	0.733	1.005	1.072	0.994	1.094	0.998	0.906	0.833	1338.6	1473.1	980.8	1345.4	1435.3	1330.5	1463.9	1335.7	1212.7	1114.4	-0.619	0.496256	0.951	1.09	0.242656	0.995
O15013	ARHGEF10	Rho guanine nucleotide exchange factor 10 OS=Homo sapiens OX=9606 GN=ARHGEF10 PE=1 SV=4	1	2	2	2	151.5	1.004	0.871	0.875	0.919	0.732	0.825	1.021	1.138	1.223	72.8	73.1	63.4	63.7	66.9	53.3	60.1	74.3	82.8	89	1.99	0.0109885	0.355	-0.923	0.180502	0.994
O15014	ZNF609	Zinc finger protein 609 OS=Homo sapiens OX=9606 GN=ZNF609 PE=1 SV=2	2	2	2	2	151.1	1.062	1.076	1.024	0.928	1.005	0.852	1.014	1.073	1.3	248.8	264.3	267.9	254.7	230.9	250.2	212.1	252.2	266.9	323.6	0.407	0.553855	0.955	-1.43	0.0562259	0.986
O15020	SPTBN2	Spectrin beta chain, non-erythrocytic 2 OS=Homo sapiens OX=9606 GN=SPTBN2 PE=1 SV=3	1	2	2	2	271.2	0.423	0.95	1.254	0.499	0.813	0.585	0.669	1.484	2.188	294	124.3	279.2	368.8	146.8	239	172	196.8	436.4	643.2	2.07	0.266657	0.922	-2.15	0.251347	0.995
O15027	SEC16A	Protein transport protein Sec16A OS=Homo sapiens OX=9606 GN=SEC16A PE=1 SV=4	9	13	13	13	251.7	1.036	0.876	1.073	0.985	0.78	1.025	1.148	1.04	1.005	1731	1793.2	1516.7	1857.2	1705.3	1350.7	1773.5	1987	1801	1739.1	0.62	0.487999	0.951	-0.609	0.495037	0.997
O15031	PLXNB2	Plexin-B2 OS=Homo sapiens OX=9606 GN=PLXNB2 PE=1 SV=3	11	15	18	15	205	0.899	0.95	1.033	0.98	0.913	0.982	0.961	0.97	1.081	2060.9	1852.7	1957.7	2128	2020.4	1881.1	2023.2	1981.3	1998.2	2227.1	0.358	0.572906	0.956	0.0357	0.954778	0.998
O15037	KHNYN	Protein KHNYN OS=Homo sapiens OX=9606 GN=KHNYN PE=1 SV=3	1	1	1	1	74.5	0.992	1.057	1.036	1.127	1.109	1.056	0.917	0.927	1.072	134.3	133.3	141.9	139.2	151.4	149	141.8	123.2	124.5	144	-0.811	0.198128	0.902	0.959	0.133994	0.992
O15054	KDM6B	Lysine-specific demethylase 6B OS=Homo sapiens OX=9606 GN=KDM6B PE=1 SV=4	1	1	2	1	176.5	0.899	0.801	0.705	1.146	0.809	1.013	1.102	0.832	0.883	86.1	77.5	69	60.7	98.7	69.7	87.2	94.9	71.7	76.1	1.22	0.269134	0.922	1.87	0.104088	0.991
O15067	PFAS	Phosphoribosylformylglycinamidine synthase OS=Homo sapiens OX=9606 GN=PFAS PE=1 SV=4	14	17	24	17	144.6	0.985	0.858	0.926	0.975	0.985	0.984	0.865	0.98	0.995	3705.3	3651.3	3177.5	3432.9	3614.1	3649.1	3645.7	3204.2	3631	3688.6	0.0678	0.908087	0.969	0.661	0.275171	0.995
O15078	CEP290	Centrosomal protein of 290 kDa OS=Homo sapiens OX=9606 GN=CEP290 PE=1 SV=2	1	2	2	2	290.2	0.878	0.907	0.969	0.866	0.934	1.019	1.009	0.952	0.853	333	292.2	301.8	322.7	288.3	311.2	339.3	336.1	317.1	283.9	0.273	0.704972	0.963	0.292	0.685271	0.997
O15084	ANKRD28	Serine/threonine-protein phosphatase 6 regulatory ankyrin repeat subunit A OS=Homo sapiens OX=9606 GN=ANKRD28 PE=1 SV=5	9	7	7	7	112.9	0.959	1.022	0.984	1.034	1.107	1.015	1.053	1.018	0.871	838.5	804	856.5	824.9	866.8	927.8	851.2	883.3	853.5	730.2	0.00243	0.997099	0.972	0.918	0.189885	0.994
O15085	ARHGEF11	Rho guanine nucleotide exchange factor 11 OS=Homo sapiens OX=9606 GN=ARHGEF11 PE=1 SV=1	2	2	2	2	167.6	1.038	0.967	1.08	0.974	0.929	1.052	1.186	1.268	1.138	380.8	395.3	368.1	411.2	371.1	353.7	400.7	451.6	482.9	433.3	1.41	0.0490431	0.71	-0.45	0.493091	0.997
O15091	PRORP	Mitochondrial ribonuclease P catalytic subunit OS=Homo sapiens OX=9606 GN=PRORP PE=1 SV=2	3	1	1	1	67.3	0.831	0.829	1.061	1.005	0.897	0.952	1.088	1.25	1.002	72.3	60.1	59.9	76.7	72.7	64.9	68.9	78.7	90.4	72.5	1.97	0.0371806	0.646	0.417	0.623313	0.997
O15111	CHUK	Inhibitor of nuclear factor kappa-B kinase subunit alpha OS=Homo sapiens OX=9606 GN=CHUK PE=1 SV=2	10	6	6	6	84.6	0.91	0.848	1.089	0.958	0.944	1.081	0.832	1.088	0.968	629.6	573.2	533.7	685.7	602.8	594.2	680.3	524	685.1	609.2	0.0466	0.95955	0.971	0.537	0.562589	0.997
O15116	LSM1	U6 snRNA-associated Sm-like protein LSm1 OS=Homo sapiens OX=9606 GN=LSM1 PE=1 SV=1	11	2	3	2	15.2	0.977	1.019	1.185	0.826	0.911	0.825	0.852	1.01	1.028	530.2	517.9	540.5	628.1	437.8	483.3	437.5	451.6	535.6	544.9	-1.09	0.153736	0.88	-2.16	0.0120493	0.954
O15119	TBX3	T-box transcription factor TBX3 OS=Homo sapiens OX=9606 GN=TBX3 PE=1 SV=4	6	3	3	3	79.3	1.097	1.05	1.079	0.943	1.01	0.975	1.051	0.996	0.771	297.2	326.2	312.1	320.7	280.4	300.2	289.7	312.3	296.2	229.1	-1.34	0.0935234	0.823	-1.1	0.158553	0.993
O15126	SCAMP1	Secretory carrier-associated membrane protein 1 OS=Homo sapiens OX=9606 GN=SCAMP1 PE=1 SV=2	18	4	4	4	37.9	0.832	0.921	0.73	1.249	0.858	1.171	1.212	0.971	0.934	74	61.5	68.1	54	92.4	63.4	86.6	89.6	71.8	69.1	1.91	0.118858	0.853	2.57	0.0446851	0.984
O15127	SCAMP2	Secretory carrier-associated membrane protein 2 OS=Homo sapiens OX=9606 GN=SCAMP2 PE=1 SV=2	6	1	1	1	36.6	0.738	0.739	0.705	1.055	0.827	1.034	1.023	0.97	0.955	89.7	66.2	66.2	63.2	94.6	74.1	92.7	91.7	86.9	85.6	2.08	0.0181667	0.444	2.21	0.013181	0.958
O15143	ARPC1B	Actin-related protein 2/3 complex subunit 1B OS=Homo sapiens OX=9606 GN=ARPC1B PE=1 SV=3	19	7	8	7	40.9	0.904	1.2	1.091	1.094	1.038	1.017	1.056	1.015	1.098	1026	927.1	1231.6	1119.5	1122	1065.3	1043.5	1083.1	1041.8	1126	0.0574	0.940311	0.97	0.259	0.736262	0.997
O15144	ARPC2	Actin-related protein 2/3 complex subunit 2 OS=Homo sapiens OX=9606 GN=ARPC2 PE=1 SV=1	26	8	12	8	34.3	0.914	1.044	1.032	0.939	0.956	0.956	0.917	0.986	1.039	2600	2376.9	2714.8	2683.6	2442.6	2486.6	2485.1	2384.1	2563.5	2702.2	-0.299	0.628434	0.959	-0.498	0.425725	0.996
O15145	ARPC3	Actin-related protein 2/3 complex subunit 3 OS=Homo sapiens OX=9606 GN=ARPC3 PE=1 SV=3	18	4	6	4	20.5	0.984	1.023	1.107	0.928	0.941	0.893	0.87	0.993	1.031	896.6	882.6	917.6	992.2	831.7	843.8	800.6	780.2	890.6	924.1	-0.948	0.148041	0.877	-1.35	0.049187	0.985
O15160	POLR1C	DNA-directed RNA polymerases I and III subunit RPAC1 OS=Homo sapiens OX=9606 GN=POLR1C PE=1 SV=1	30	8	12	8	39.2	1.067	1.176	1.091	0.974	0.971	0.95	0.985	1.015	1.072	1927.1	2056	2265.6	2102.3	1877.7	1871.3	1831.7	1897.5	1955.4	2065.4	-0.986	0.0740119	0.788	-1.52	0.0115897	0.953
O15164	TRIM24	Transcription intermediary factor 1-alpha OS=Homo sapiens OX=9606 GN=TRIM24 PE=1 SV=3	18	15	18	14	116.8	1.134	0.88	0.872	1.126	1.105	1.105	1.187	0.922	0.884	2142	2429	1885.1	1868.3	2412.4	2366.8	2366.7	2542.3	1975.5	1892.6	0.238	0.818148	0.967	1.77	0.108951	0.991
O15173	PGRMC2	Membrane-associated progesterone receptor component 2 OS=Homo sapiens OX=9606 GN=PGRMC2 PE=1 SV=1	26	5	6	4	23.8	0.953	0.966	0.938	1.224	1.19	1.146	1.023	0.948	0.796	422.7	403	408.2	396.4	517.2	503.1	484.5	432.4	400.6	336.5	-0.165	0.79924	0.966	2.55	0.00234957	0.793
O15212	PFDN6	Prefoldin subunit 6 OS=Homo sapiens OX=9606 GN=PFDN6 PE=1 SV=1	21	3	4	3	14.6	1.105	0.724	1.157	0.919	0.632	0.846	0.9	0.944	0.894	946.7	1045.9	685.3	1095.8	869.6	597.9	801.2	852.1	893.4	846	-1.28	0.204593	0.904	-2.06	0.0535646	0.986
O15213	WDR46	WD repeat-containing protein 46 OS=Homo sapiens OX=9606 GN=WDR46 PE=1 SV=3	7	3	3	3	68	1.031	1.119	1.016	1.045	1.066	1.088	1.098	1.063	1.133	498.1	513.5	557.2	506.3	520.5	531	541.8	547	529.6	564.5	0.404	0.459672	0.948	0.356	0.512947	0.997
O15217	GSTA4	Glutathione S-transferase A4 OS=Homo sapiens OX=9606 GN=GSTA4 PE=1 SV=1	4	1	1	1	25.7	1.01	1.098	0.96	0.97	0.967	1.052	0.697	0.861	0.751	236.7	239	259.9	227.3	229.6	228.8	249.1	165.1	203.8	177.8	-2.35	0.00364248	0.161	-0.178	0.781042	0.997
O15226	NKRF	NF-kappa-B-repressing factor OS=Homo sapiens OX=9606 GN=NKRF PE=1 SV=2	15	10	10	10	77.6	0.994	1.011	0.959	0.966	0.885	0.925	0.983	0.995	1.109	1008.3	1002.7	1019	967.3	973.6	891.9	932.2	991.5	1003.7	1117.9	0.318	0.574506	0.956	-0.722	0.216638	0.994
O15228	GNPAT	Dihydroxyacetone phosphate acyltransferase OS=Homo sapiens OX=9606 GN=GNPAT PE=1 SV=1	2	2	2	2	77.1	0.978	1.038	1.148	1.128	1.129	0.93	1.028	1.079	1.064	123.1	120.3	127.8	141.3	138.9	138.9	114.4	126.5	132.7	131	0.0491	0.947935	0.97	0.231	0.759624	0.997
O15240	VGF	Neurosecretory protein VGF OS=Homo sapiens OX=9606 GN=VGF PE=1 SV=2	45	22	68	22	67.2	0.872	0.957	1.216	0.887	0.921	0.976	1.03	1.164	0.894	10356.9	9034.2	9907.8	12590.7	9183.9	9537	10103.6	10669.9	12057.1	9256.8	0.317	0.745527	0.964	-0.81	0.413842	0.996
O15260	SURF4	Surfeit locus protein 4 OS=Homo sapiens OX=9606 GN=SURF4 PE=1 SV=3	10	2	3	2	30.4	0.636	0.668	0.698	1.065	0.67	1.164	0.859	1.283	1.092	434.5	276.1	290.1	303.5	462.8	291.2	505.6	373.3	557.6	474.5	3.06	0.0305183	0.595	2.64	0.0547966	0.986
O15269	SPTLC1	Serine palmitoyltransferase 1 OS=Homo sapiens OX=9606 GN=SPTLC1 PE=1 SV=1	12	6	8	6	52.7	1.044	0.916	0.99	1.01	1	0.973	0.989	1.041	1.078	1791.4	1870.2	1641.2	1773.7	1810	1791.5	1742.4	1771.3	1864.3	1931	0.443	0.438541	0.947	0.177	0.753891	0.997
O15270	SPTLC2	Serine palmitoyltransferase 2 OS=Homo sapiens OX=9606 GN=SPTLC2 PE=1 SV=1	16	6	6	6	62.9	1.135	1.025	1.062	1.15	1.215	1.119	1.021	1.048	0.899	466.7	529.5	478.3	495.8	536.9	567	522.2	476.3	489.2	419.5	-0.937	0.160237	0.884	0.956	0.152745	0.993
O15294	OGT	UDP-N-acetylglucosamine--peptide N-acetylglucosaminyltransferase 110 kDa subunit OS=Homo sapiens OX=9606 GN=OGT PE=1 SV=3	9	9	13	9	116.9	1.028	0.913	1.035	0.943	0.818	0.9	1.006	1.094	1.087	1329.9	1367.5	1214.2	1377.1	1254.8	1087.5	1197.2	1337.7	1454.6	1445.9	0.649	0.290732	0.927	-1.22	0.0621252	0.987
O15305	PMM2	Phosphomannomutase 2 OS=Homo sapiens OX=9606 GN=PMM2 PE=1 SV=1	33	8	12	7	28.1	0.954	1.033	1.088	0.935	0.937	0.87	0.94	1.097	1.125	2257.6	2153.6	2331.4	2456.9	2109.8	2114.4	1964.4	2122.3	2476.6	2540.6	0.177	0.792707	0.966	-1.26	0.0827974	0.989
O15315	RAD51B	DNA repair protein RAD51 homolog 2 OS=Homo sapiens OX=9606 GN=RAD51B PE=1 SV=2	3	1	1	1	42.2	0.958	0.894	0.911	0.967	0.927	0.88	0.943	0.924	0.714	90.5	86.7	80.9	82.4	87.5	83.9	79.6	85.3	83.6	64.7	-0.454	0.454047	0.948	0.00587	0.992159	0.998
O15327	INPP4B	Inositol polyphosphate 4-phosphatase type II OS=Homo sapiens OX=9606 GN=INPP4B PE=1 SV=4	4	2	2	2	104.7	1.023	0.556	1.475	1.229	1.233	1.016	0.957	0.754	0.344	276.7	283	153.7	408	340.1	341.1	281.1	264.8	208.7	95.1	-2.2	0.125628	0.86	1.48	0.287391	0.995
O15347	HMGB3	High mobility group protein B3 OS=Homo sapiens OX=9606 GN=HMGB3 PE=1 SV=4	13	2	3	2	23	0.919	0.766	0.945	0.964	0.932	0.896	0.978	1.006	0.898	475.6	437	364.2	449.4	458.3	443.1	426.1	465	478.6	427	0.747	0.220847	0.91	0.415	0.48475	0.997
O15355	PPM1G	Protein phosphatase 1G OS=Homo sapiens OX=9606 GN=PPM1G PE=1 SV=1	10	5	5	5	59.2	0.82	0.278	0.707	1.191	0.317	1.334	1.097	0.91	0.922	489.7	401.6	136.1	346	583.1	155.2	653.2	537.3	445.7	451.4	2.35	0.146411	0.875	2.98	0.0732837	0.989
O15357	INPPL1	Phosphatidylinositol 3,4,5-trisphosphate 5-phosphatase 2 OS=Homo sapiens OX=9606 GN=INPPL1 PE=1 SV=2	8	8	9	8	138.5	0.904	0.971	0.946	1.061	1.043	1.036	1.045	1.027	1.269	777.6	703.3	755.3	735.7	825	810.7	805.5	812.6	798.9	986.9	1.66	0.0173975	0.431	1.46	0.031737	0.979
O15360	FANCA	Fanconi anemia group A protein OS=Homo sapiens OX=9606 GN=FANCA PE=1 SV=2	1	2	3	2	162.7	0.984	0.724	1.022	1.128	0.814	0.981	0.983	1.077	0.929	153.8	151.3	111.4	157.2	173.4	125.2	150.9	151.3	165.7	142.9	0.637	0.520151	0.953	0.593	0.548537	0.997
O15371	EIF3D	Eukaryotic translation initiation factor 3 subunit D OS=Homo sapiens OX=9606 GN=EIF3D PE=1 SV=1	16	7	8	7	63.9	1.032	1.05	0.954	1.022	1.062	1.061	1.047	0.995	0.966	1500.7	1548.6	1576.4	1431.6	1533.9	1593.1	1592.3	1571.3	1493.8	1449.5	-0.154	0.797467	0.966	0.589	0.336327	0.996
O15372	EIF3H	Eukaryotic translation initiation factor 3 subunit H OS=Homo sapiens OX=9606 GN=EIF3H PE=1 SV=1	27	9	22	9	39.9	1.074	1.031	0.969	0.96	0.979	0.995	1.008	0.954	0.973	3530.1	3792.6	3637.8	3420	3388.7	3457.2	3514.2	3558.1	3368.3	3433.5	-0.626	0.29736	0.928	-0.503	0.39756	0.996
O15381	NVL	Nuclear valosin-containing protein-like OS=Homo sapiens OX=9606 GN=NVL PE=1 SV=1	9	7	8	7	95	1.069	0.944	0.839	1.117	1.077	1.073	0.97	0.902	0.903	759.4	811.8	717.2	637.3	848.1	817.9	814.5	736.5	684.6	686.1	-0.461	0.519213	0.953	1.64	0.0384969	0.982
O15382	BCAT2	Branched-chain-amino-acid aminotransferase, mitochondrial OS=Homo sapiens OX=9606 GN=BCAT2 PE=1 SV=2	21	7	11	7	44.3	0.903	1.16	1.063	0.888	1.007	0.893	0.934	1.004	1.18	1405.4	1269.7	1630.6	1494.2	1248.1	1414.7	1255.2	1313.1	1410.9	1657.8	-0.154	0.859789	0.968	-1.13	0.212742	0.994
O15397	IPO8	Importin-8 OS=Homo sapiens OX=9606 GN=IPO8 PE=1 SV=2	7	6	8	6	119.9	1.002	0.746	0.841	1.085	0.928	1.053	1.017	0.997	0.87	409.4	410	305.6	344.4	444	379.7	430.9	416.4	408.2	356.2	0.81	0.335437	0.934	1.62	0.0702933	0.988
O15399	GRIN2D	Glutamate receptor ionotropic, NMDA 2D OS=Homo sapiens OX=9606 GN=GRIN2D PE=1 SV=2	1	1	1	1	143.7	0.926	0.907	1.319	0.884	0.814	0.791	0.845	1.193	1.057	287.5	266.3	260.7	379.1	254.1	233.9	227.3	243	343.1	303.8	-0.033	0.975556	0.971	-1.98	0.0885422	0.99
O15446	POLR1G	DNA-directed RNA polymerase I subunit RPA34 OS=Homo sapiens OX=9606 GN=POLR1G PE=1 SV=1	16	5	5	5	55	0.982	0.919	0.951	1.016	0.903	1.13	1.011	0.905	0.901	653.7	642.2	600.9	621.8	664	590	738.5	661.1	591.9	589.2	-0.143	0.853425	0.968	0.821	0.30153	0.995
O15481	MAGEB4	Melanoma-associated antigen B4 OS=Homo sapiens OX=9606 GN=MAGEB4 PE=1 SV=1	3	1	1	1	38.9	0.364	1.075	1.169	1.248	1.192	1.214	1.074	1.197	1.112	110.9	40.4	119.2	129.7	138.4	132.2	134.6	119.1	132.8	123.3	1.69	0.170209	0.889	2.61	0.0452724	0.984
O15504	NUP42	Nucleoporin NUP42 OS=Homo sapiens OX=9606 GN=NUP42 PE=1 SV=1	6	2	3	2	44.8	1.031	1.272	1.076	0.923	0.954	0.887	1	0.978	0.968	174	179.4	221.2	187.1	160.6	165.9	154.3	173.9	170.1	168.3	-1.4	0.0374808	0.648	-2.06	0.0054756	0.907
O15511	ARPC5	Actin-related protein 2/3 complex subunit 5 OS=Homo sapiens OX=9606 GN=ARPC5 PE=1 SV=3	48	7	9	6	16.3	0.956	1.058	1.075	0.954	0.942	0.962	0.946	0.985	1.027	875.2	836.9	926.2	940.6	834.6	824.4	842.3	827.7	862.3	899.2	-0.596	0.301999	0.929	-0.836	0.157768	0.993
O15514	POLR2D	DNA-directed RNA polymerase II subunit RPB4 OS=Homo sapiens OX=9606 GN=POLR2D PE=1 SV=1	28	3	4	3	16.3	1.027	1.025	1.05	0.962	1.032	0.974	0.993	1.039	1.062	991.2	1018.3	1016.1	1041.1	953.3	1023.3	965.1	984.5	1030	1052.7	-0.15	0.771339	0.965	-0.469	0.371631	0.996
O15523	DDX3Y	ATP-dependent RNA helicase DDX3Y OS=Homo sapiens OX=9606 GN=DDX3Y PE=1 SV=2	38	23	38	7	73.1	1.039	0.925	0.872	1.15	0.976	1.035	1.04	1.005	0.929	1368.3	1421.9	1266.2	1193.2	1573	1335.9	1415.9	1423.3	1374.7	1271	0.426	0.580012	0.957	1.27	0.118829	0.992
O15525	MAFG	Transcription factor MafG OS=Homo sapiens OX=9606 GN=MAFG PE=1 SV=1	9	1	1	1	17.8	0.897	0.758	0.61	1.171	0.893	1.042	1.068	0.883	0.785	35.2	31.6	26.7	21.5	41.2	31.5	36.7	37.6	31.1	27.6	1.24	0.230539	0.912	2.51	0.0273354	0.977
O15530	PDPK1	3-phosphoinositide-dependent protein kinase 1 OS=Homo sapiens OX=9606 GN=PDPK1 PE=1 SV=1	9	5	5	5	63.1	0.991	1.104	1.128	0.992	1.112	1.046	1.009	1.006	1.066	1130.5	1120.4	1248	1275	1121.4	1257.5	1182.2	1140.8	1137.4	1204.8	-0.537	0.389103	0.941	-0.0564	0.926542	0.998
O15533	TAPBP	Tapasin OS=Homo sapiens OX=9606 GN=TAPBP PE=1 SV=1	2	1	1	1	47.6	0.788	0.859	1.59	0.705	1.135	0.784	0.693	1.299	0.946	518.7	408.9	445.4	824.9	365.7	588.6	406.7	359.3	673.7	490.5	-0.276	0.873183	0.968	-1	0.56605	0.997
O15541	RNF113A	E3 ubiquitin-protein ligase RNF113A OS=Homo sapiens OX=9606 GN=RNF113A PE=1 SV=1	13	3	4	3	38.8	0.939	0.991	0.856	1.051	1.074	0.966	0.944	1.126	0.797	135.8	127.5	134.6	116.3	142.8	145.8	131.2	128.2	153	108.2	0.361	0.665889	0.961	1.28	0.144453	0.993
O15550	KDM6A	Lysine-specific demethylase 6A OS=Homo sapiens OX=9606 GN=KDM6A PE=1 SV=2	2	2	2	2	154.1	0.867	0.99	0.891	0.714	0.881	1.024	0.894	0.853	0.772	68.9	59.7	68.2	61.3	49.2	60.7	70.6	61.6	58.7	53.2	-0.695	0.404836	0.943	-0.202	0.805932	0.997
O43143	DHX15	Pre-mRNA-splicing factor ATP-dependent RNA helicase DHX15 OS=Homo sapiens OX=9606 GN=DHX15 PE=1 SV=2	30	21	47	21	90.9	1.134	0.998	0.908	1.071	1.059	1.069	1.045	0.919	0.906	8438.5	9565.2	8424.3	7658.5	9035.3	8937	9021.2	8818.4	7755.4	7646.6	-0.646	0.420618	0.945	0.811	0.316206	0.996
O43148	RNMT	mRNA cap guanine-N7 methyltransferase OS=Homo sapiens OX=9606 GN=RNMT PE=1 SV=1	17	8	10	8	54.8	1.123	0.946	0.843	1.049	0.989	1.05	1.056	1.023	0.996	1424.9	1599.8	1347.5	1200.7	1494.9	1409.3	1495.6	1504	1457.2	1419.7	0.498	0.536731	0.954	0.76	0.352094	0.996
O43149	ZZEF1	Zinc finger ZZ-type and EF-hand domain-containing protein 1 OS=Homo sapiens OX=9606 GN=ZZEF1 PE=1 SV=6	1	2	3	2	330.9	0.885	0.972	1.051	1.073	0.994	0.987	0.89	1.086	1.074	164.3	145.4	159.6	172.7	176.2	163.4	162.1	146.2	178.4	176.4	0.406	0.596276	0.958	0.728	0.349979	0.996
O43150	ASAP2	Arf-GAP with SH3 domain, ANK repeat and PH domain-containing protein 2 OS=Homo sapiens OX=9606 GN=ASAP2 PE=1 SV=3	2	2	2	2	111.6	1.096	1.367	1.12	1.371	1.098	1.122	1.397	0.873	0.935	34.6	38	47.4	38.8	47.5	38	38.9	48.4	30.2	32.4	-1.43	0.214804	0.908	0.268	0.808781	0.997
O43159	RRP8	Ribosomal RNA-processing protein 8 OS=Homo sapiens OX=9606 GN=RRP8 PE=1 SV=2	7	3	3	3	50.7	1.136	1.032	0.846	1.275	0.944	1.118	1.143	0.999	0.886	49.3	56	50.9	41.7	62.9	46.6	55.1	56.4	49.3	43.7	-0.0235	0.983223	0.971	1.02	0.369903	0.996
O43166	SIPA1L1	Signal-induced proliferation-associated 1-like protein 1 OS=Homo sapiens OX=9606 GN=SIPA1L1 PE=1 SV=4	1	2	2	2	199.9	0.822	1.022	0.866	1.07	0.792	1.222	1.157	0.856	0.74	74.5	61.3	76.1	64.5	79.7	59	91.1	86.2	63.8	55.1	0.361	0.783574	0.966	1.42	0.292127	0.995
O43169	CYB5B	Cytochrome b5 type B OS=Homo sapiens OX=9606 GN=CYB5B PE=1 SV=3	8	1	1	1	16.7	1.273	0.967	0.952	0.931	1.033	1.072	1.048	0.98	1.098	109	138.7	105.4	103.8	101.4	112.6	116.9	114.2	106.8	119.7	-0.102	0.910734	0.97	-0.252	0.78222	0.997
O43172	PRPF4	U4/U6 small nuclear ribonucleoprotein Prp4 OS=Homo sapiens OX=9606 GN=PRPF4 PE=1 SV=2	25	12	13	12	58.4	1.135	0.999	1.035	0.989	0.811	0.721	1.095	1.044	1.005	2152.7	2443.6	2151.2	2227.9	2128.2	1746.6	1553	2357.3	2247.4	2162.5	-0.132	0.864229	0.968	-2.15	0.0169293	0.966
O43175	PHGDH	D-3-phosphoglycerate dehydrogenase OS=Homo sapiens OX=9606 GN=PHGDH PE=1 SV=4	28	12	28	12	56.6	1.097	0.938	0.783	1.146	1.262	1.285	1.151	0.855	0.816	3535.1	3877.4	3317	2767	4050.1	4462.2	4541.6	4067.1	3023.7	2886.1	-0.0638	0.952933	0.971	2.68	0.0289213	0.978
O43181	NDUFS4	NADH dehydrogenase [ubiquinone] iron-sulfur protein 4, mitochondrial OS=Homo sapiens OX=9606 GN=NDUFS4 PE=1 SV=1	11	2	4	2	20.1	1.098	1.471	1.119	1.19	1.002	1.119	0.986	0.828	0.924	341.4	374.8	502.3	381.9	406.3	342.1	382.2	336.7	282.6	315.6	-2.71	0.00461697	0.194	-0.516	0.505854	0.997
O43182	ARHGAP6	Rho GTPase-activating protein 6 OS=Homo sapiens OX=9606 GN=ARHGAP6 PE=1 SV=3	4	3	4	3	105.9	1.036	1.526	1.177	1.296	0.969	0.993	1.144	0.772	0.647	270.8	280.6	413.2	318.8	350.9	262.4	268.8	309.7	209	175.2	-2.73	0.048267	0.707	-0.917	0.467516	0.996
O43189	PHF1	PHD finger protein 1 OS=Homo sapiens OX=9606 GN=PHF1 PE=1 SV=3	5	3	3	3	62.1	1.024	0.897	0.888	1.127	1.112	1.057	1.047	0.968	1.008	461	471.9	413.3	409.5	519.8	512.8	487.4	482.5	446.2	464.8	0.673	0.306139	0.93	1.93	0.0112842	0.951
O43196	MSH5	MutS protein homolog 5 OS=Homo sapiens OX=9606 GN=MSH5 PE=1 SV=1	1	1	1	1	92.8	0.833	0.742	0.877	1.024	0.999	0.798	0.845	1.049	0.875	176.4	147	130.8	154.7	180.6	176.2	140.8	149	185.1	154.3	0.882	0.292516	0.927	1.25	0.146512	0.993
O43237	DYNC1LI2	Cytoplasmic dynein 1 light intermediate chain 2 OS=Homo sapiens OX=9606 GN=DYNC1LI2 PE=1 SV=1	20	7	9	7	54.1	0.949	1.162	1.187	0.862	0.847	0.883	0.99	1.103	1.114	1824.4	1731.7	2120.2	2165.2	1572.9	1545.7	1611.8	1805.5	2012.6	2032.7	-0.207	0.769964	0.965	-2.39	0.00590604	0.913
O43242	PSMD3	26S proteasome non-ATPase regulatory subunit 3 OS=Homo sapiens OX=9606 GN=PSMD3 PE=1 SV=2	33	16	28	16	60.9	1.017	0.991	1.046	1.021	1.01	0.999	1.043	1.046	1	4514.8	4589.9	4474.3	4720.8	4610.2	4561.4	4509.7	4709.6	4721.3	4513.5	0.0762	0.88117	0.969	0.0285	0.955356	0.998
O43252	PAPSS1	Bifunctional 3'-phosphoadenosine 5'-phosphosulfate synthase 1 OS=Homo sapiens OX=9606 GN=PAPSS1 PE=1 SV=2	21	12	14	12	70.8	1.154	0.964	0.915	1.063	0.846	0.949	0.932	0.755	1.116	2021.7	2332.4	1949.2	1850.4	2148.3	1710.7	1919.5	1884.3	1527.3	2255.4	-0.831	0.433917	0.946	-0.524	0.618346	0.997
O43264	ZW10	Centromere/kinetochore protein zw10 homolog OS=Homo sapiens OX=9606 GN=ZW10 PE=1 SV=3	12	7	10	7	88.8	0.904	0.77	1.02	0.891	0.858	0.966	0.836	1.169	0.919	1443.9	1305.1	1111.9	1472.6	1286.9	1238.3	1395.4	1207.8	1687.5	1327.6	0.579	0.539826	0.954	-0.0898	0.923519	0.998
O43278	SPINT1	Kunitz-type protease inhibitor 1 OS=Homo sapiens OX=9606 GN=SPINT1 PE=1 SV=2	2	1	1	1	58.4	0.998	0.846	0.968	0.905	0.859	0.989	0.995	1.019	0.948	58.6	58.5	49.6	56.8	53	50.4	58	58.3	59.7	55.6	0.429	0.515773	0.953	-0.286	0.662607	0.997
O43290	SART1	U4/U6.U5 tri-snRNP-associated protein 1 OS=Homo sapiens OX=9606 GN=SART1 PE=1 SV=1	20	13	16	13	90.2	0.946	0.916	0.903	1.049	0.904	0.99	1.074	1.105	1.084	2007.7	1900.3	1838.3	1812.3	2106.3	1814.3	1988	2156.3	2218	2177.1	1.82	0.0105745	0.348	0.789	0.203728	0.994
O43291	SPINT2	Kunitz-type protease inhibitor 2 OS=Homo sapiens OX=9606 GN=SPINT2 PE=1 SV=2	8	2	2	2	28.2	0.778	0.83	0.963	0.982	0.89	0.925	0.784	1.023	0.858	184.8	143.7	153.3	178	181.5	164.4	170.9	144.8	189	158.5	0.247	0.739288	0.964	0.658	0.383054	0.996
O43292	GPAA1	Glycosylphosphatidylinositol anchor attachment 1 protein OS=Homo sapiens OX=9606 GN=GPAA1 PE=1 SV=3	5	2	2	2	67.6	0.992	0.838	0.986	1.123	0.856	1.168	1.286	1.14	1.133	96.7	96	81.1	95.3	108.7	82.8	112.9	124.4	110.3	109.6	2.26	0.0339444	0.623	1.23	0.213433	0.994
O43293	DAPK3	Death-associated protein kinase 3 OS=Homo sapiens OX=9606 GN=DAPK3 PE=1 SV=1	2	1	2	1	52.5	0.859	0.973	1.042	0.835	0.876	0.717	0.945	1.142	1.255	220.3	189.3	214.2	229.5	183.9	192.9	157.9	208.1	251.5	276.5	1.34	0.120007	0.854	-1.45	0.0949944	0.99
O43314	PPIP5K2	Inositol hexakisphosphate and diphosphoinositol-pentakisphosphate kinase 2 OS=Homo sapiens OX=9606 GN=PPIP5K2 PE=1 SV=3	8	8	9	6	140.3	0.918	0.883	1.076	1.008	0.947	0.869	0.919	1.101	1.054	808.5	741.9	713.9	870.1	815.3	765.9	702.4	742.9	890.1	852.4	0.592	0.456497	0.948	-0.165	0.833825	0.998
O43324	EEF1E1	Eukaryotic translation elongation factor 1 epsilon-1 OS=Homo sapiens OX=9606 GN=EEF1E1 PE=1 SV=1	15	3	3	3	19.8	0.981	1.003	0.999	0.972	0.968	0.935	0.993	0.945	0.987	735.1	721.2	737.4	734.6	714.6	711.5	687.5	730	694.5	725.4	-0.304	0.550044	0.955	-0.394	0.442075	0.996
O43353	RIPK2	Receptor-interacting serine/threonine-protein kinase 2 OS=Homo sapiens OX=9606 GN=RIPK2 PE=1 SV=2	5	2	2	2	61.2	1.054	0.995	1.023	0.962	0.971	0.89	1.028	1	1.003	170.8	180.1	170	174.8	164.4	165.8	152.1	175.6	170.8	171.4	-0.252	0.645848	0.96	-0.994	0.0910294	0.99
O43379	WDR62	WD repeat-containing protein 62 OS=Homo sapiens OX=9606 GN=WDR62 PE=1 SV=4	1	2	2	2	165.8	0.976	1.058	0.773	0.85	1.091	0.971	1.155	0.903	0.864	194.4	189.8	205.8	150.4	165.3	212.2	188.8	224.6	175.6	168	0.274	0.806239	0.966	0.297	0.790107	0.997
O43390	HNRNPR	Heterogeneous nuclear ribonucleoprotein R OS=Homo sapiens OX=9606 GN=HNRNPR PE=1 SV=1	34	19	35	12	70.9	1.129	0.976	0.912	1.134	1.114	1.104	1.1	0.989	0.962	2636.7	2976.4	2573.5	2404.3	2988.8	2936.4	2910.3	2901.2	2606.7	2537	0.074	0.92446	0.97	1.4	0.0962211	0.99
O43395	PRPF3	U4/U6 small nuclear ribonucleoprotein Prp3 OS=Homo sapiens OX=9606 GN=PRPF3 PE=1 SV=2	27	15	19	15	77.5	1.143	0.952	0.985	1.052	0.936	0.921	1.11	1.046	1.026	2535.4	2898.2	2412.8	2498.5	2667.5	2373.9	2336.2	2813.9	2653.2	2600.1	0.345	0.654615	0.961	-0.573	0.461638	0.996
O43396	TXNL1	Thioredoxin-like protein 1 OS=Homo sapiens OX=9606 GN=TXNL1 PE=1 SV=3	52	11	20	11	32.2	1.112	1.048	0.984	1.021	1.065	1.05	1.041	0.931	0.845	2996	3332.3	3140.4	2949.5	3060.1	3190	3144.4	3118.5	2790	2531.1	-1.17	0.125009	0.859	0.153	0.830372	0.998
O43399	TPD52L2	Tumor protein D54 OS=Homo sapiens OX=9606 GN=TPD52L2 PE=1 SV=2	41	7	10	7	22.2	1.018	1.008	0.998	0.929	0.965	0.896	0.943	0.998	1.01	1312.7	1336.1	1323.2	1310.2	1218.9	1266.3	1175.9	1238.1	1309.8	1325.4	-0.432	0.40654	0.943	-0.944	0.0874277	0.99
O43402	EMC8	ER membrane protein complex subunit 8 OS=Homo sapiens OX=9606 GN=EMC8 PE=1 SV=1	17	3	5	3	23.8	1.029	1.06	0.993	1.043	1.058	0.954	1.034	1.094	0.978	427.7	440.3	453.4	424.5	446.2	452.6	407.9	442.1	468	418.4	0.049	0.936512	0.97	0.024	0.968907	0.998
O43414	ERI3	ERI1 exoribonuclease 3 OS=Homo sapiens OX=9606 GN=ERI3 PE=1 SV=2	3	1	1	1	37.2	1.059	1.126	1.257	0.936	0.973	0.956	0.861	1.009	1.056	323.2	342.1	363.8	406.2	302.5	314.5	309.1	278.4	326	341.4	-1.81	0.0189189	0.457	-1.9	0.0146885	0.961
O43422	THAP12	52 kDa repressor of the inhibitor of the protein kinase OS=Homo sapiens OX=9606 GN=THAP12 PE=1 SV=2	2	1	1	1	87.6	0.932	0.657	1.004	0.797	0.937	0.918	0.853	0.954	0.894	95.9	89.4	63	96.2	76.4	89.8	88	81.8	91.4	85.7	-0.0772	0.917368	0.97	-0.152	0.838208	0.998
O43426	SYNJ1	Synaptojanin-1 OS=Homo sapiens OX=9606 GN=SYNJ1 PE=1 SV=2	3	4	4	4	173	0.979	1.017	1.015	0.95	1.02	1.047	0.953	1.014	0.971	527.1	515.9	536.3	535.1	500.9	537.7	551.8	502.6	534.3	511.9	-0.376	0.510609	0.952	0.133	0.814638	0.997
O43427	FIBP	Acidic fibroblast growth factor intracellular-binding protein OS=Homo sapiens OX=9606 GN=FIBP PE=1 SV=3	11	3	4	3	41.9	0.954	0.999	1.179	0.972	1.02	0.944	0.97	1.152	1.063	1020.8	973.7	1020.2	1203.6	992.6	1041.1	963.6	990.1	1175.8	1085.4	0.172	0.815345	0.967	-0.559	0.453091	0.996
O43432	EIF4G3	Eukaryotic translation initiation factor 4 gamma 3 OS=Homo sapiens OX=9606 GN=EIF4G3 PE=1 SV=2	7	12	16	8	176.5	0.974	1.045	1.232	0.874	0.825	0.884	0.976	1.059	1.125	956.5	932.1	999.5	1178.6	836.1	789	845.2	933.7	1012.8	1075.8	-0.274	0.688155	0.962	-2.28	0.00619365	0.917
O43447	PPIH	Peptidyl-prolyl cis-trans isomerase H OS=Homo sapiens OX=9606 GN=PPIH PE=1 SV=1	27	5	9	5	19.2	1.033	0.927	0.931	0.976	1.002	0.941	0.976	1.001	0.978	2021.2	2088.8	1873	1882.5	1972.3	2026.2	1901.2	1973.5	2023.5	1975.8	0.105	0.852709	0.968	0.103	0.856209	0.998
O43464	HTRA2	Serine protease HTRA2, mitochondrial OS=Homo sapiens OX=9606 GN=HTRA2 PE=1 SV=2	5	2	2	2	48.8	0.967	1.292	1.098	1.15	1.087	0.942	1.071	1.036	1.046	584.3	565.1	754.9	641.5	671.7	634.9	550.2	625.6	605.1	611.4	-0.398	0.63295	0.96	-0.178	0.830283	0.998
O43474	KLF4	Krueppel-like factor 4 OS=Homo sapiens OX=9606 GN=KLF4 PE=1 SV=3	2	1	1	1	54.6	1.302	1.015	0.497	1.972	1.767	1.659	1.646	0.593	0.695	21.1	27.5	21.4	10.5	41.6	37.3	35	34.8	12.5	14.7	-0.414	0.818094	0.967	4.05	0.0431006	0.983
O43488	AKR7A2	Aflatoxin B1 aldehyde reductase member 2 OS=Homo sapiens OX=9606 GN=AKR7A2 PE=1 SV=3	23	7	10	6	39.6	0.881	1.05	0.973	1.003	1.18	0.973	1.071	0.909	0.906	1096.3	966.3	1150.7	1066.8	1100.1	1293.9	1066.9	1174.1	996.5	992.9	-0.0119	0.98907	0.971	1	0.261541	0.995
O43491	EPB41L2	Band 4.1-like protein 2 OS=Homo sapiens OX=9606 GN=EPB41L2 PE=1 SV=1	4	4	5	4	112.5	1.197	0.407	0.756	1.081	0.588	1.02	1.036	1.01	0.847	518.5	620.7	211.1	392	560.3	305.1	528.7	537	523.9	439	0.83	0.573669	0.956	0.68	0.643898	0.997
O43493	TGOLN2	Trans-Golgi network integral membrane protein 2 OS=Homo sapiens OX=9606 GN=TGOLN2 PE=1 SV=4	24	8	12	8	45.9	1.059	1.04	0.98	1.062	0.968	1.013	1.048	0.839	0.93	1676.2	1775.7	1744	1642.5	1779.9	1623.4	1698.8	1756.5	1406.6	1559.1	-0.957	0.21612	0.908	-0.00805	0.991358	0.998
O43504	LAMTOR5	Ragulator complex protein LAMTOR5 OS=Homo sapiens OX=9606 GN=LAMTOR5 PE=1 SV=1	22	1	1	1	9.6	0.789	0.935	1.522	1.23	1.158	1.233	1.06	1.383	1.084	164	129.4	153.3	249.5	201.7	189.8	202.1	173.8	226.7	177.7	1.33	0.273044	0.923	2.01	0.10995	0.991
O43542	XRCC3	DNA repair protein XRCC3 OS=Homo sapiens OX=9606 GN=XRCC3 PE=1 SV=1	6	2	2	2	37.8	1.354	0.821	1.046	1.375	1.406	1.09	1.514	1.383	0.955	85.6	115.9	70.3	89.6	117.8	120.4	93.4	129.7	118.5	81.8	1.26	0.337868	0.935	1.84	0.170576	0.993
O43572	AKAP10	A-kinase anchor protein 10, mitochondrial OS=Homo sapiens OX=9606 GN=AKAP10 PE=1 SV=2	3	2	2	2	73.8	1.045	1.156	1.017	0.902	0.902	0.892	0.957	0.998	1.004	216.4	226.2	250.2	220.2	195.2	195.2	193	207.1	215.9	217.2	-1.03	0.0770042	0.794	-1.95	0.00370856	0.866
O43583	DENR	Density-regulated protein OS=Homo sapiens OX=9606 GN=DENR PE=1 SV=2	21	4	6	4	22.1	1.037	1.108	0.918	1.089	1.135	1.157	1.12	1.022	0.95	726	752.7	804.1	666.5	790.3	823.8	839.8	813.3	741.6	690	0.0885	0.906754	0.969	1.31	0.105805	0.991
O43592	XPOT	Exportin-T OS=Homo sapiens OX=9606 GN=XPOT PE=1 SV=2	5	5	7	5	109.9	1.059	0.619	0.956	0.918	0.779	1.014	0.951	1.126	0.891	965.7	1022.3	597.8	923.6	886.9	752.5	979.6	918.8	1087.9	860.1	0.618	0.55615	0.955	-0.139	0.893929	0.998
O43598	DNPH1	2'-deoxynucleoside 5'-phosphate N-hydrolase 1 OS=Homo sapiens OX=9606 GN=DNPH1 PE=1 SV=1	25	3	7	3	19.1	0.889	1.029	1.034	0.891	1.036	0.902	1.019	1	1.171	716.1	636.6	736.7	740.4	638.1	742	645.8	729.4	716.3	838.4	0.741	0.343941	0.936	-0.431	0.576191	0.997
O43615	TIMM44	Mitochondrial import inner membrane translocase subunit TIM44 OS=Homo sapiens OX=9606 GN=TIMM44 PE=1 SV=2	26	11	13	11	51.3	1.055	1.072	1	0.955	1.014	0.945	1.016	1.014	1.019	2239.6	2362.6	2401.7	2239.9	2139.9	2271.4	2117.3	2275.7	2271.7	2282.4	-0.372	0.497588	0.951	-0.793	0.163686	0.993
O43617	TRAPPC3	Trafficking protein particle complex subunit 3 OS=Homo sapiens OX=9606 GN=TRAPPC3 PE=1 SV=1	14	3	3	3	20.3	0.924	0.882	0.96	0.965	0.971	1.003	0.842	1.053	1.113	763.9	705.9	673.8	733.4	737.2	741.5	766.2	643	804.1	849.9	0.766	0.30891	0.93	0.715	0.340483	0.996
O43633	CHMP2A	Charged multivesicular body protein 2a OS=Homo sapiens OX=9606 GN=CHMP2A PE=1 SV=1	20	4	12	4	25.1	0.939	0.97	0.98	1.165	1.184	1.114	1.004	1.161	0.904	1161.5	1090.3	1126.2	1138.1	1353.7	1375.4	1294.5	1165.7	1348	1050	0.654	0.352562	0.937	2.21	0.00800548	0.934
O43660	PLRG1	Pleiotropic regulator 1 OS=Homo sapiens OX=9606 GN=PLRG1 PE=1 SV=1	10	5	6	5	57.2	1.046	0.975	0.973	0.951	1.006	0.976	1.078	1.099	1.007	700.3	732.5	682.6	681.2	665.9	704.8	683.3	755.2	769.7	705.4	0.651	0.287205	0.926	-0.218	0.714732	0.997
O43663	PRC1	Protein regulator of cytokinesis 1 OS=Homo sapiens OX=9606 GN=PRC1 PE=1 SV=2	5	2	3	2	71.6	1.205	0.944	0.61	1.451	1.213	1.478	1.244	0.672	0.621	194.1	233.9	183.3	118.3	281.7	235.4	286.9	241.6	130.5	120.5	-0.54	0.719686	0.963	3.28	0.0487202	0.985
O43665	RGS10	Regulator of G-protein signaling 10 OS=Homo sapiens OX=9606 GN=RGS10 PE=1 SV=3	7	1	1	1	21.2	1.119	1.274	0.881	1.138	1.421	1.173	1.117	1.424	1.055	62.9	70.4	80.2	55.5	71.6	89.4	73.8	70.3	89.6	66.4	0.828	0.404089	0.943	1.45	0.157789	0.993
O43670	ZNF207	BUB3-interacting and GLEBS motif-containing protein ZNF207 OS=Homo sapiens OX=9606 GN=ZNF207 PE=1 SV=1	7	3	6	3	50.7	0.981	0.939	1	1.008	0.941	1.021	1.063	0.913	0.932	1276.7	1252.8	1198.4	1276.1	1286.5	1200.8	1303.6	1356.5	1166	1189.3	-0.0595	0.930508	0.97	0.295	0.66718	0.997
O43674	NDUFB5	NADH dehydrogenase [ubiquinone] 1 beta subcomplex subunit 5, mitochondrial OS=Homo sapiens OX=9606 GN=NDUFB5 PE=1 SV=1	14	3	3	3	21.7	1.053	1.124	1.052	1.078	0.897	1.048	0.876	1.052	0.995	507.2	533.9	570.1	533.8	547	454.9	531.8	444.6	533.7	504.7	-1.25	0.123809	0.858	-0.593	0.442619	0.996
O43676	NDUFB3	NADH dehydrogenase [ubiquinone] 1 beta subcomplex subunit 3 OS=Homo sapiens OX=9606 GN=NDUFB3 PE=1 SV=3	21	2	4	2	11.4	1.108	1.135	1.07	1.009	0.919	1.019	0.911	0.938	0.966	521	577.5	591.4	557.6	525.9	479	531	474.5	488.6	503.2	-1.96	0.00516716	0.213	-1.22	0.0519151	0.985
O43678	NDUFA2	NADH dehydrogenase [ubiquinone] 1 alpha subcomplex subunit 2 OS=Homo sapiens OX=9606 GN=NDUFA2 PE=1 SV=3	57	5	5	5	10.9	1.105	0.994	1.165	1.053	0.87	0.984	0.929	0.922	1.017	819.2	905.3	814.7	954.3	863	712.6	806.1	760.9	755.4	833.4	-1.59	0.0509934	0.719	-1.16	0.135809	0.992
O43681	GET3	ATPase GET3 OS=Homo sapiens OX=9606 GN=GET3 PE=1 SV=2	25	7	12	7	38.8	1.083	1.177	0.956	1.007	1.062	0.995	0.972	0.931	0.909	1783.8	1931.2	2098.7	1705.6	1796.2	1893.9	1775.6	1734.2	1661.2	1621.2	-1.47	0.0477198	0.704	-0.312	0.643365	0.997
O43683	BUB1	Mitotic checkpoint serine/threonine-protein kinase BUB1 OS=Homo sapiens OX=9606 GN=BUB1 PE=1 SV=1	2	2	2	2	122.3	1.116	0.876	0.942	1.005	0.944	1.017	1.146	1.042	1.033	185.7	207.2	162.7	175	186.6	175.3	188.9	212.8	193.5	191.8	0.935	0.255662	0.919	0.163	0.837932	0.998
O43684	BUB3	Mitotic checkpoint protein BUB3 OS=Homo sapiens OX=9606 GN=BUB3 PE=1 SV=1	36	11	17	11	37.1	1.074	1.033	0.977	1.075	1.059	1.046	1.044	0.993	0.988	2775.4	2980.2	2866.7	2711.1	2983.9	2940.5	2904.4	2898.2	2756.2	2741.9	-0.295	0.609994	0.958	0.551	0.349092	0.996
O43707	ACTN4	Alpha-actinin-4 OS=Homo sapiens OX=9606 GN=ACTN4 PE=1 SV=2	43	33	100	23	104.8	1	1.044	0.948	1.019	1.066	1.037	1.005	0.94	0.954	12497.5	12496.2	13049.8	11853	12732.1	13327	12959.9	12559.7	11745.5	11923.8	-0.412	0.476678	0.95	0.681	0.24962	0.995
O43709	BUD23	Probable 18S rRNA (guanine-N(7))-methyltransferase OS=Homo sapiens OX=9606 GN=BUD23 PE=1 SV=2	24	4	5	4	31.9	1.006	1.041	0.909	1.096	1.051	0.991	1.08	1.082	1.019	603.2	606.8	627.8	548.1	661	634	598	651.7	652.9	614.8	0.806	0.224771	0.911	0.853	0.20109	0.994
O43716	GATC	Glutamyl-tRNA(Gln) amidotransferase subunit C, mitochondrial OS=Homo sapiens OX=9606 GN=GATC PE=1 SV=1	54	6	8	6	15.1	1.091	0.916	0.914	0.922	0.966	0.925	1.029	0.981	1.037	1546.3	1687.8	1416.6	1413.6	1425.5	1493.3	1429.9	1591.9	1517.7	1604	0.351	0.613247	0.959	-0.5	0.474134	0.996
O43739	CYTH3	Cytohesin-3 OS=Homo sapiens OX=9606 GN=CYTH3 PE=1 SV=2	8	3	3	3	46.3	1.196	0.858	1.079	0.908	0.949	0.814	1.047	1.132	1.122	364.8	436.1	313.1	393.4	331.3	346.1	297	382	412.8	409.2	0.534	0.525569	0.953	-1.71	0.0606341	0.987
O43747	AP1G1	AP-1 complex subunit gamma-1 OS=Homo sapiens OX=9606 GN=AP1G1 PE=1 SV=5	14	10	15	10	91.3	0.879	1.045	1.042	1.267	0.991	0.957	1.056	1.003	0.785	1957.7	1720.9	2045	2040.6	2481	1939.8	1873.2	2068	1963.3	1536.7	-0.235	0.81465	0.967	0.843	0.407578	0.996
O43760	SYNGR2	Synaptogyrin-2 OS=Homo sapiens OX=9606 GN=SYNGR2 PE=1 SV=1	4	1	1	1	24.8	0.989	1.015	0.894	1.193	1.137	1.165	0.98	0.879	0.829	135.2	133.7	137.2	120.9	161.4	153.8	157.5	132.5	118.8	112.1	-0.727	0.265299	0.921	2.21	0.00489167	0.896
O43765	SGTA	Small glutamine-rich tetratricopeptide repeat-containing protein alpha OS=Homo sapiens OX=9606 GN=SGTA PE=1 SV=1	30	8	17	8	34	1.009	0.974	1.006	0.982	0.966	0.953	0.904	1.05	1.005	1523.2	1537	1483.5	1532.1	1495.1	1472	1451.5	1376.3	1599	1530.3	-0.261	0.645852	0.96	-0.322	0.570964	0.997
O43768	ENSA	Alpha-endosulfine OS=Homo sapiens OX=9606 GN=ENSA PE=1 SV=1	6	1	1	1	13.4	0.992	0.85	1.189	0.834	0.843	0.885	0.934	1.107	1.141	227.3	225.5	193.2	270.3	189.6	191.7	201.3	212.2	251.7	259.5	0.394	0.648507	0.96	-1.7	0.0701211	0.988
O43772	SLC25A20	Mitochondrial carnitine/acylcarnitine carrier protein OS=Homo sapiens OX=9606 GN=SLC25A20 PE=1 SV=1	3	1	1	1	32.9	1.068	1.01	1.458	0.958	0.834	0.723	0.657	0.836	0.755	90.5	96.6	91.4	131.9	86.7	75.5	65.4	59.5	75.6	68.3	-3.55	0.00113912	0.042	-2.91	0.00422331	0.881
O43776	NARS1	Asparagine--tRNA ligase, cytoplasmic OS=Homo sapiens OX=9606 GN=NARS1 PE=1 SV=1	29	13	18	13	62.9	0.983	0.855	0.924	0.97	0.948	0.995	1.013	0.989	1.022	4047.3	3976.6	3459.6	3741.7	3925.2	3838	4026.5	4101.7	4002.5	4136.7	0.848	0.145822	0.875	0.549	0.331699	0.996
O43795	MYO1B	Unconventional myosin-Ib OS=Homo sapiens OX=9606 GN=MYO1B PE=1 SV=3	2	3	4	2	131.9	0.896	1.007	1.676	0.633	0.784	0.695	0.775	1.397	1.223	122.3	109.6	123.2	204.9	77.4	95.9	85	94.8	170.8	149.5	-0.038	0.978519	0.971	-3.33	0.0357618	0.981
O43805	SSNA1	Sjoegren syndrome nuclear autoantigen 1 OS=Homo sapiens OX=9606 GN=SSNA1 PE=1 SV=2	28	4	4	4	13.6	0.999	0.679	1.026	1.035	0.713	0.882	0.827	1.075	0.885	1086.6	1085.6	738	1115.1	1125.1	774.9	958.5	898.3	1168.3	961.5	-0.0995	0.924524	0.97	-0.38	0.717993	0.997
O43809	NUDT21	Cleavage and polyadenylation specificity factor subunit 5 OS=Homo sapiens OX=9606 GN=NUDT21 PE=1 SV=1	41	9	14	9	26.2	1.028	0.982	0.966	1.002	1.051	1.005	0.977	0.945	1	2261.5	2324.5	2219.8	2184.1	2266.2	2376.7	2271.7	2210.2	2137.9	2262.6	-0.342	0.525768	0.953	0.432	0.424838	0.996
O43813	LANCL1	Glutathione S-transferase LANCL1 OS=Homo sapiens OX=9606 GN=LANCL1 PE=1 SV=1	10	4	6	4	45.3	1.001	1.034	1.262	0.935	1.07	0.999	0.853	0.943	0.883	659.2	659.6	681.7	832	616.4	705.4	658.5	562	621.6	582.1	-2.13	0.0128092	0.379	-0.777	0.297362	0.995
O43815	STRN	Striatin OS=Homo sapiens OX=9606 GN=STRN PE=1 SV=4	8	5	6	5	86.1	1.193	1.021	0.924	1.083	1.132	1.051	0.991	0.925	0.957	368	439	375.8	340	398.4	416.7	386.7	364.6	340.5	352.3	-0.993	0.206045	0.905	0.742	0.336628	0.996
O43818	RRP9	U3 small nucleolar RNA-interacting protein 2 OS=Homo sapiens OX=9606 GN=RRP9 PE=1 SV=1	13	5	8	5	51.8	0.943	0.964	1.037	0.984	0.898	0.913	0.951	1.077	1.043	1575.6	1486	1519.2	1633.4	1551.2	1415.3	1438.4	1498.9	1696.4	1643.9	0.384	0.526064	0.953	-0.542	0.375501	0.996
O43819	SCO2	Protein SCO2 homolog, mitochondrial OS=Homo sapiens OX=9606 GN=SCO2 PE=1 SV=3	20	4	5	4	29.8	0.835	1.278	0.977	0.868	1.044	0.807	0.844	1.155	1.196	971.7	811.4	1242.2	949.8	843.6	1014.5	784	820	1122	1162	0.417	0.736564	0.964	-0.973	0.438744	0.996
O43823	AKAP8	A-kinase anchor protein 8 OS=Homo sapiens OX=9606 GN=AKAP8 PE=1 SV=1	15	6	6	6	76.1	0.931	0.858	1.025	0.952	0.869	0.888	1.015	1.088	1.12	503.5	468.8	432.2	515.9	479.2	437.3	446.9	510.9	547.6	563.8	1.4	0.0360127	0.638	-0.454	0.450204	0.996
O43824	GTPBP6	Putative GTP-binding protein 6 OS=Homo sapiens OX=9606 GN=GTPBP6 PE=2 SV=4	14	5	7	5	56.9	0.864	1.024	1.04	1.022	1.097	0.94	0.901	1.002	1.16	1473.1	1272.5	1508.6	1532.5	1506.2	1616.5	1384.2	1327.5	1476.2	1708.5	0.266	0.754205	0.965	0.606	0.480619	0.997
O43837	IDH3B	Isocitrate dehydrogenase [NAD] subunit beta, mitochondrial OS=Homo sapiens OX=9606 GN=IDH3B PE=1 SV=2	19	7	9	7	42.2	1.08	1.124	0.96	1.104	1.151	1.124	1.132	0.916	0.931	986	1064.5	1107.9	946.2	1088.9	1135.2	1108.5	1115.9	903.4	917.5	-0.711	0.396305	0.942	0.957	0.26017	0.995
O43847	NRDC	Nardilysin OS=Homo sapiens OX=9606 GN=NRDC PE=1 SV=3	12	14	17	14	131.6	1.003	0.737	0.992	0.937	0.878	0.976	0.967	1.006	0.991	2708.4	2717.5	1996	2686.1	2537.4	2377.9	2644.1	2619.4	2725.7	2685.3	0.489	0.485372	0.951	-0.0551	0.93657	0.998
O43852	CALU	Calumenin OS=Homo sapiens OX=9606 GN=CALU PE=1 SV=2	12	3	3	3	37.1	1.04	0.894	0.822	1.126	1.112	1.121	1.127	0.881	0.863	432	449.2	386.4	355.2	486.4	480.2	484.2	486.9	380.4	372.9	0.317	0.731869	0.964	2.24	0.0314096	0.979
O43865	AHCYL1	S-adenosylhomocysteine hydrolase-like protein 1 OS=Homo sapiens OX=9606 GN=AHCYL1 PE=1 SV=2	19	9	15	6	58.9	1.045	1.051	1.115	0.815	0.774	0.771	1	1.016	1.249	683.9	714.5	719.1	762.4	557.5	529.1	527	684	695.1	854.1	-0.133	0.827928	0.967	-2.93	0.000589762	0.374
O43920	NDUFS5	NADH dehydrogenase [ubiquinone] iron-sulfur protein 5 OS=Homo sapiens OX=9606 GN=NDUFS5 PE=1 SV=3	34	4	5	4	12.5	1.057	1.106	1.169	1.044	0.888	0.958	0.903	0.896	0.936	679.3	718.2	751.3	794.4	709.5	603.4	650.6	613.6	608.8	635.9	-2.26	0.00368478	0.162	-1.48	0.0335708	0.98
O43924	PDE6D	Retinal rod rhodopsin-sensitive cGMP 3',5'-cyclic phosphodiesterase subunit delta OS=Homo sapiens OX=9606 GN=PDE6D PE=1 SV=1	8	1	1	1	17.4	0.932	0.997	1.065	0.91	1.108	0.944	0.923	1.108	0.999	175.8	163.8	175.3	187.2	159.9	194.9	166.1	162.3	194.8	175.6	0.0348	0.966302	0.971	-0.0911	0.911965	0.998
O43933	PEX1	Peroxisome biogenesis factor 1 OS=Homo sapiens OX=9606 GN=PEX1 PE=1 SV=1	6	6	8	6	142.8	0.989	1.125	1.144	0.969	1	0.979	0.96	1.01	1.071	697.3	689.6	784.1	797.8	675.7	697.3	682.6	669.2	704.4	746.5	-0.828	0.183819	0.896	-0.978	0.122453	0.992
O60216	RAD21	Double-strand-break repair protein rad21 homolog OS=Homo sapiens OX=9606 GN=RAD21 PE=1 SV=2	15	6	9	6	71.6	1.125	0.94	0.872	1.035	1.013	1.016	1.125	1	0.881	755.3	849.6	709.7	658.7	782	765.2	767.7	849.6	755.4	665.5	0.216	0.81122	0.967	0.602	0.510027	0.997
O60220	TIMM8A	Mitochondrial import inner membrane translocase subunit Tim8 A OS=Homo sapiens OX=9606 GN=TIMM8A PE=1 SV=1	42	4	5	4	11	0.945	0.859	0.945	0.951	0.873	0.959	0.866	0.915	0.869	899.1	849.9	772	849.6	854.9	784.5	862.1	778.8	822.2	781.7	-0.443	0.414425	0.944	0.099	0.852821	0.998
O60231	DHX16	Pre-mRNA-splicing factor ATP-dependent RNA helicase DHX16 OS=Homo sapiens OX=9606 GN=DHX16 PE=1 SV=2	14	11	12	11	119.2	0.984	0.878	0.992	0.981	0.814	1.023	1.058	1.07	1.068	1605.3	1579.3	1410.2	1593.2	1575.1	1307.4	1641.9	1698.7	1717.5	1714.5	1.21	0.106135	0.84	-0.0265	0.969597	0.998
O60232	ZNRD2	Protein ZNRD2 OS=Homo sapiens OX=9606 GN=ZNRD2 PE=1 SV=1	17	2	2	2	21.5	0.894	1.014	1.047	1.025	0.961	0.941	0.981	1.239	1.027	226.2	202.2	229.5	236.8	232	217.3	212.8	221.9	280.4	232.4	0.86	0.27269	0.923	-0.0087	0.990855	0.998
O60244	MED14	Mediator of RNA polymerase II transcription subunit 14 OS=Homo sapiens OX=9606 GN=MED14 PE=1 SV=2	2	2	2	2	160.5	0.976	0.852	0.969	1.025	0.967	1.048	1.002	1.084	0.927	291.7	284.6	248.5	282.6	299.1	282.2	305.6	292.4	316.3	270.3	0.734	0.275961	0.924	1.01	0.144249	0.993
O60256	PRPSAP2	Phosphoribosyl pyrophosphate synthase-associated protein 2 OS=Homo sapiens OX=9606 GN=PRPSAP2 PE=1 SV=1	17	5	8	3	40.9	0.843	0.886	1.144	0.976	0.982	0.894	0.924	1.057	1.037	288.6	243.4	255.7	330.3	281.6	283.4	257.9	266.8	305.1	299.1	0.43	0.615746	0.959	-0.0524	0.950857	0.998
O60264	SMARCA5	SWI/SNF-related matrix-associated actin-dependent regulator of chromatin subfamily A member 5 OS=Homo sapiens OX=9606 GN=SMARCA5 PE=1 SV=1	26	25	45	18	121.8	1.06	0.93	0.917	1.064	1.077	1.051	1.158	0.984	0.94	4777	5061.5	4443.5	4379.5	5081.1	5146.9	5022.4	5533.7	4698.5	4492.6	0.515	0.520164	0.953	1.24	0.140649	0.993
O60271	SPAG9	C-Jun-amino-terminal kinase-interacting protein 4 OS=Homo sapiens OX=9606 GN=SPAG9 PE=1 SV=4	13	14	18	14	146.1	1.029	0.869	1.025	1.032	0.862	1.06	1.128	0.998	1.004	3324.2	3422.2	2887.3	3407.6	3431.7	2865.7	3525.1	3749.7	3316.3	3336.4	0.614	0.477369	0.95	0.188	0.825606	0.997
O60291	MGRN1	E3 ubiquitin-protein ligase MGRN1 OS=Homo sapiens OX=9606 GN=MGRN1 PE=1 SV=2	4	1	1	1	60.7	0.915	1.125	0.848	0.858	0.967	0.794	0.809	1.023	1.243	39.1	35.8	44	33.2	33.6	37.8	31	31.7	40	48.6	0.436	0.685388	0.962	-0.898	0.409801	0.996
O60299	LZTS3	Leucine zipper putative tumor suppressor 3 OS=Homo sapiens OX=9606 GN=LZTS3 PE=2 SV=1	1	1	1	1	71.7	0.836	0.651	1.206	0.871	0.788	0.883	0.971	1.138	1.214	105.1	87.9	68.4	126.8	91.5	82.8	92.8	102	119.5	127.5	1.73	0.126603	0.86	-0.824	0.445112	0.996
O60306	AQR	RNA helicase aquarius OS=Homo sapiens OX=9606 GN=AQR PE=1 SV=4	6	8	8	8	171.2	1.005	0.889	0.93	1.025	0.983	0.992	1.032	0.987	1.066	769.3	773.1	683.9	715.5	788.2	756.3	763.3	793.9	759	820.2	0.86	0.152785	0.88	0.743	0.210549	0.994
O60313	OPA1	Dynamin-like 120 kDa protein, mitochondrial OS=Homo sapiens OX=9606 GN=OPA1 PE=1 SV=3	9	7	8	7	111.6	0.927	1.033	0.924	0.911	0.964	0.947	0.994	0.966	0.924	853.2	790.5	881.3	788.2	777.3	822.4	808.1	848	824.5	788.5	-0.0135	0.981994	0.971	-0.217	0.717014	0.997
O60318	MCM3AP	Germinal-center associated nuclear protein OS=Homo sapiens OX=9606 GN=MCM3AP PE=1 SV=2	1	1	1	1	218.3	1.019	1.039	1.087	1.038	1.137	0.874	1.003	1.242	0.986	306.6	312.3	318.5	333.3	318.1	348.6	268	307.7	380.9	302.3	0.0692	0.936907	0.97	-0.304	0.728715	0.997
O60333	KIF1B	Kinesin-like protein KIF1B OS=Homo sapiens OX=9606 GN=KIF1B PE=1 SV=5	7	9	11	2	204.3	0.887	1.273	1.263	1.028	0.94	0.844	1.134	1.087	1.14	86.4	76.6	110	109.1	88.8	81.2	72.9	98	93.9	98.5	0.246	0.801531	0.966	-1.6	0.123161	0.992
O60341	KDM1A	Lysine-specific histone demethylase 1A OS=Homo sapiens OX=9606 GN=KDM1A PE=1 SV=2	14	9	13	9	92.8	1.021	1.01	1.084	0.998	1.082	1.012	1.02	1.003	0.999	1449	1479.3	1462.9	1570.9	1445.5	1568.3	1466.2	1478.3	1453.4	1447.6	-0.427	0.43842	0.947	0.0364	0.946506	0.998
O60343	TBC1D4	TBC1 domain family member 4 OS=Homo sapiens OX=9606 GN=TBC1D4 PE=1 SV=2	3	3	3	3	146.5	1.094	1.064	0.949	0.867	0.949	0.919	0.959	0.948	1.016	94.8	103.8	101	90	82.2	90	87.2	91	89.9	96.3	-0.838	0.208246	0.905	-1.45	0.0423514	0.983
O60476	MAN1A2	Mannosyl-oligosaccharide 1,2-alpha-mannosidase IB OS=Homo sapiens OX=9606 GN=MAN1A2 PE=1 SV=1	2	1	2	1	73	0.967	0.992	0.991	0.938	1.103	1.043	1.04	1.047	1.126	322.1	311.5	319.4	319.2	301.9	355.3	335.8	334.8	337.3	362.6	0.913	0.172113	0.89	0.611	0.3488	0.996
O60487	MPZL2	Myelin protein zero-like protein 2 OS=Homo sapiens OX=9606 GN=MPZL2 PE=1 SV=1	6	1	1	1	24.5	0.748	0.626	0.962	1.029	0.813	1.095	0.9	1.138	1.1	91.8	68.7	57.5	88.3	94.4	74.6	100.5	82.6	104.4	101	2.14	0.0555876	0.736	1.8	0.0998076	0.991
O60488	ACSL4	Long-chain-fatty-acid--CoA ligase 4 OS=Homo sapiens OX=9606 GN=ACSL4 PE=1 SV=2	3	2	2	1	79.1	1.164	0.594	0.836	0.923	1.158	0.787	1.166	1.372	1.041	160	186.3	95	133.7	147.7	185.4	126	186.5	219.5	166.6	2.46	0.0839081	0.808	0.409	0.756623	0.997
O60493	SNX3	Sorting nexin-3 OS=Homo sapiens OX=9606 GN=SNX3 PE=1 SV=3	31	5	8	3	18.8	0.935	1.068	1.15	0.802	0.899	0.86	0.84	1.038	1.067	2306.8	2156.2	2462.8	2653.7	1850.2	2074.7	1984.3	1937.6	2394.2	2461.7	-0.781	0.345849	0.936	-2.07	0.0254399	0.975
O60502	OGA	Protein O-GlcNAcase OS=Homo sapiens OX=9606 GN=OGA PE=1 SV=2	17	11	12	11	102.8	0.941	0.987	1.088	0.909	0.966	1.183	1.013	1.04	1.117	1599.1	1503.9	1577.5	1739.6	1453.5	1544.6	1892.4	1620	1663.1	1785.8	0.511	0.548625	0.955	0.13	0.877581	0.998
O60506	SYNCRIP	Heterogeneous nuclear ribonucleoprotein Q OS=Homo sapiens OX=9606 GN=SYNCRIP PE=1 SV=2	35	18	41	11	69.6	1.004	0.923	0.956	1.021	1.008	1.006	1.026	0.998	0.968	3965	3979.9	3661.1	3788.8	4047.3	3996.9	3989.5	4066.6	3958.4	3836.9	0.347	0.523288	0.953	0.706	0.207602	0.994
O60508	CDC40	Pre-mRNA-processing factor 17 OS=Homo sapiens OX=9606 GN=CDC40 PE=1 SV=1	6	4	5	4	65.5	1.077	1.164	1.181	1.111	1.132	1.092	0.992	1.007	0.891	336.6	362.4	391.9	397.4	374	381.1	367.6	334	339.1	300.1	-1.82	0.00658789	0.261	0.0205	0.970231	0.998
O60518	RANBP6	Ran-binding protein 6 OS=Homo sapiens OX=9606 GN=RANBP6 PE=1 SV=2	4	5	6	4	124.6	1.009	0.642	0.919	1.044	0.943	1.182	1.284	0.836	0.78	528.6	533.5	339.2	485.6	551.7	498.6	624.9	678.7	442	412.3	0.713	0.579161	0.957	1.79	0.180287	0.994
O60524	NEMF	Nuclear export mediator factor NEMF OS=Homo sapiens OX=9606 GN=NEMF PE=1 SV=4	3	3	3	3	122.9	0.806	0.677	0.911	0.974	0.739	1.051	1.027	1.137	1.202	401.1	323.5	271.4	365.4	390.8	296.5	421.4	411.9	455.9	482	2.96	0.00444075	0.188	1.22	0.164853	0.993
O60547	GMDS	GDP-mannose 4,6 dehydratase OS=Homo sapiens OX=9606 GN=GMDS PE=1 SV=1	23	8	9	8	41.9	0.907	0.859	1.229	0.973	0.995	0.868	0.867	0.967	1.036	1791.9	1624.9	1539.9	2202	1744.2	1782.5	1556	1554.4	1732.6	1857.2	-0.46	0.625672	0.959	-0.407	0.665277	0.997
O60563	CCNT1	Cyclin-T1 OS=Homo sapiens OX=9606 GN=CCNT1 PE=1 SV=1	12	7	8	7	80.6	0.941	1.043	0.997	0.826	0.97	0.951	1.218	1.056	1.188	1209.8	1137.9	1262.1	1205.6	999.7	1173.1	1150.8	1473.3	1277.8	1437.1	1.51	0.0503529	0.716	-0.805	0.264027	0.995
O60566	BUB1B	Mitotic checkpoint serine/threonine-protein kinase BUB1 beta OS=Homo sapiens OX=9606 GN=BUB1B PE=1 SV=3	7	8	8	8	119.5	1.091	0.779	0.854	1.025	0.981	1.046	1.011	0.914	0.847	600.3	655.1	467.9	512.9	615.4	588.6	627.8	607	548.8	508.2	-0.0393	0.964298	0.971	1.12	0.220086	0.994
O60568	PLOD3	Multifunctional procollagen lysine hydroxylase and glycosyltransferase LH3 OS=Homo sapiens OX=9606 GN=PLOD3 PE=1 SV=1	17	12	15	12	84.7	1.133	1.258	0.993	1.164	1.277	1.092	1.096	0.85	1.025	1521.7	1723.7	1914.2	1510.9	1771	1943.6	1662.5	1667.5	1293.8	1559.6	-1.25	0.171275	0.89	0.709	0.424293	0.996
O60573	EIF4E2	Eukaryotic translation initiation factor 4E type 2 OS=Homo sapiens OX=9606 GN=EIF4E2 PE=1 SV=1	16	3	6	3	28.3	1.016	0.962	0.906	0.992	0.907	0.968	0.962	0.971	0.949	740.7	752.2	712.4	671.3	734.7	672	717.1	712.8	719.2	703.1	-0.147	0.798181	0.966	-0.059	0.918027	0.998
O60610	DIAPH1	Protein diaphanous homolog 1 OS=Homo sapiens OX=9606 GN=DIAPH1 PE=1 SV=2	15	18	29	18	141.3	0.782	0.988	1.235	0.813	0.836	0.893	0.882	1.234	1.095	3744.3	2928.5	3697.8	4622.4	3045.1	3130.1	3342.8	3304.3	4621	4099	0.551	0.62346	0.959	-1.57	0.179221	0.994
O60645	EXOC3	Exocyst complex component 3 OS=Homo sapiens OX=9606 GN=EXOC3 PE=1 SV=3	3	2	2	2	85.5	0.948	0.941	1.157	1.076	1.056	1.061	0.985	1.112	1.074	300.3	284.8	282.7	347.3	323.3	317	318.7	295.9	334	322.5	0.454	0.515698	0.953	0.871	0.224686	0.994
O60664	PLIN3	Perilipin-3 OS=Homo sapiens OX=9606 GN=PLIN3 PE=1 SV=3	28	10	14	10	47	0.964	1.084	0.88	1.077	1.045	1.17	1.128	0.953	0.991	1030.7	993.4	1117.5	907	1110.5	1076.6	1205.6	1162.2	982.3	1021.2	0.482	0.557355	0.955	1.52	0.0845443	0.99
O60671	RAD1	Cell cycle checkpoint protein RAD1 OS=Homo sapiens OX=9606 GN=RAD1 PE=1 SV=1	3	1	1	1	31.8	1.18	1.02	0.967	1.161	1.175	1.076	0.988	0.918	0.939	257.8	304.2	263	249.3	299.3	302.8	277.4	254.7	236.7	242.2	-1.21	0.103813	0.837	1.04	0.154785	0.993
O60675	MAFK	Transcription factor MafK OS=Homo sapiens OX=9606 GN=MAFK PE=1 SV=1	13	1	1	1	17.5	1.024	1.391	1.128	1.518	1.275	1.26	1.565	1.051	0.888	110.6	113.3	153.8	124.7	167.9	141	139.3	173.1	116.3	98.2	-0.516	0.642265	0.96	1.32	0.246799	0.995
O60678	PRMT3	Protein arginine N-methyltransferase 3 OS=Homo sapiens OX=9606 GN=PRMT3 PE=1 SV=4	6	3	4	3	59.9	1.017	0.982	1.003	0.91	0.957	0.962	0.879	0.982	0.945	431.4	438.8	423.8	432.5	392.6	412.8	415.2	379.1	423.8	407.8	-0.888	0.122974	0.857	-0.696	0.215942	0.994
O60684	KPNA6	Importin subunit alpha-7 OS=Homo sapiens OX=9606 GN=KPNA6 PE=1 SV=1	18	7	11	6	60	0.925	0.977	0.915	0.984	0.995	0.994	1.007	1.01	0.945	432.1	399.5	422.2	395.2	425	429.8	429.3	435	436.2	408.2	0.538	0.325129	0.933	0.713	0.199934	0.994
O60701	UGDH	UDP-glucose 6-dehydrogenase OS=Homo sapiens OX=9606 GN=UGDH PE=1 SV=1	38	16	36	16	55	0.74	0.781	1.181	0.901	0.832	0.822	0.861	1.321	1.046	4650.8	3440.3	3630	5491.4	4188.6	3868	3823	4005	6141.9	4866.1	1.26	0.312188	0.931	-0.752	0.538601	0.997
O60716	CTNND1	Catenin delta-1 OS=Homo sapiens OX=9606 GN=CTNND1 PE=1 SV=1	24	18	29	18	108.1	1.143	1.119	0.834	1.248	1.173	1.183	1.209	0.835	0.823	3599	4115.2	4028.2	3000.3	4490.1	4220.7	4258.5	4352.4	3003.9	2962.8	-0.822	0.490464	0.951	1.7	0.169341	0.993
O60725	ICMT	Protein-S-isoprenylcysteine O-methyltransferase OS=Homo sapiens OX=9606 GN=ICMT PE=1 SV=1	3	1	1	1	31.9	0.977	0.833	0.676	1.094	0.815	1.244	1.007	0.952	0.951	88.1	86.1	73.4	59.6	96.4	71.8	109.6	88.8	83.9	83.8	1.05	0.330468	0.934	2.03	0.0766788	0.989
O60749	SNX2	Sorting nexin-2 OS=Homo sapiens OX=9606 GN=SNX2 PE=1 SV=2	30	15	23	14	58.4	1.053	0.987	1.068	0.981	1.029	0.96	1.02	1.049	1.081	2428.2	2556.9	2395.5	2594	2381.3	2499.6	2332.2	2476.7	2547.7	2624.6	0.0453	0.932066	0.97	-0.488	0.368354	0.996
O60762	DPM1	Dolichol-phosphate mannosyltransferase subunit 1 OS=Homo sapiens OX=9606 GN=DPM1 PE=1 SV=1	25	6	9	6	29.6	1.001	1.145	0.958	1.096	1.083	1.004	0.993	0.99	0.996	1171.3	1172.6	1340.6	1121.8	1283.2	1268.6	1176	1162.6	1160.2	1166.1	-0.464	0.469157	0.949	0.577	0.371381	0.996
O60763	USO1	General vesicular transport factor p115 OS=Homo sapiens OX=9606 GN=USO1 PE=1 SV=2	20	16	20	16	107.8	0.89	0.983	1.215	0.83	0.865	0.91	0.918	1.213	1.104	2438.6	2169.5	2396.7	2961.9	2022.9	2109.3	2219	2239.6	2958.8	2693.3	0.44	0.643575	0.96	-1.61	0.111292	0.991
O60784	TOM1	Target of Myb protein 1 OS=Homo sapiens OX=9606 GN=TOM1 PE=1 SV=2	3	1	1	1	53.8	0.784	1.095	0.966	0.838	0.989	0.841	1.08	0.951	1.103	55.9	43.8	61.2	54	46.8	55.3	47	60.4	53.1	61.6	0.947	0.316722	0.931	-0.663	0.477686	0.996
O60825	PFKFB2	6-phosphofructo-2-kinase/fructose-2,6-bisphosphatase 2 OS=Homo sapiens OX=9606 GN=PFKFB2 PE=1 SV=2	15	8	9	5	58.4	0.799	1.207	1.241	0.909	1.012	0.844	1.06	1.077	1.184	1228.4	981.9	1482.2	1524	1116.6	1242.7	1036.5	1302.4	1322.5	1454	0.463	0.660124	0.961	-1.45	0.187257	0.994
O60826	CCDC22	Coiled-coil domain-containing protein 22 OS=Homo sapiens OX=9606 GN=CCDC22 PE=1 SV=1	11	6	8	6	70.7	0.995	1.02	0.991	0.931	0.982	0.962	0.943	1.078	1.082	793.2	789.6	809.1	785.9	738.4	779.1	763.1	747.6	855.2	858.2	0.22	0.704936	0.963	-0.492	0.404586	0.996
O60828	PQBP1	Polyglutamine-binding protein 1 OS=Homo sapiens OX=9606 GN=PQBP1 PE=1 SV=1	29	5	8	5	30.5	1.029	0.981	0.939	0.963	0.975	0.947	0.96	0.982	1.006	734.9	755.9	720.8	690.1	707.4	716.8	695.9	705.7	721.6	739.1	-0.156	0.767619	0.965	-0.258	0.626897	0.997
O60832	DKC1	H/ACA ribonucleoprotein complex subunit DKC1 OS=Homo sapiens OX=9606 GN=DKC1 PE=1 SV=3	1	1	1	1	57.6	1.108	0.969	0.997	1.095	1.003	1.01	1.018	0.991	1.047	163.4	181.1	158.4	162.9	179	163.9	165	166.3	162	171.1	-0.171	0.787159	0.966	0.279	0.659378	0.997
O60869	EDF1	Endothelial differentiation-related factor 1 OS=Homo sapiens OX=9606 GN=EDF1 PE=1 SV=1	33	5	9	5	16.4	1.002	0.97	1.003	1.023	1.035	0.94	0.912	1.056	0.975	1021.4	1023.9	990.5	1024.1	1044.8	1057.5	960.4	931.3	1078.6	995.6	-0.252	0.679846	0.962	0.182	0.764525	0.997
O60870	KIN	DNA/RNA-binding protein KIN17 OS=Homo sapiens OX=9606 GN=KIN PE=1 SV=2	5	2	3	2	45.3	1.111	1.017	1.047	1.238	1.102	1.101	1.019	1.22	1.198	124.3	138	126.4	130.1	153.9	136.9	136.8	126.7	151.7	148.8	0.597	0.354833	0.937	0.973	0.144863	0.993
O60879	DIAPH2	Protein diaphanous homolog 2 OS=Homo sapiens OX=9606 GN=DIAPH2 PE=1 SV=1	1	2	2	2	125.5	1.121	0.699	1.768	3.775	1.106	1.438	0.861	1.743	0.8	100	112.1	69.9	176.7	377.3	110.5	143.7	86.1	174.2	80	-0.846	0.651201	0.96	2.49	0.200688	0.994
O60884	DNAJA2	DnaJ homolog subfamily A member 2 OS=Homo sapiens OX=9606 GN=DNAJA2 PE=1 SV=1	19	8	9	8	45.7	1.017	0.97	0.981	0.928	0.939	0.946	1.015	0.984	0.992	2407.3	2449.2	2334.8	2361.1	2234.7	2261.4	2277	2442.5	2368.4	2388	-0.00041	0.999361	0.972	-0.642	0.227584	0.995
O60888	CUTA	Protein CutA OS=Homo sapiens OX=9606 GN=CUTA PE=1 SV=2	22	3	8	3	19.1	1.09	1.009	1.038	1.041	1.165	1.025	0.921	0.898	0.924	936.4	1020.5	944.6	972.3	974.8	1091	959.5	862.2	840.8	865.2	-1.63	0.0155779	0.406	0.427	0.462795	0.996
O60911	CTSV	Cathepsin L2 OS=Homo sapiens OX=9606 GN=CTSV PE=1 SV=2	2	1	1	1	37.3	1.033	1.003	1.015	0.92	0.976	1.006	1.065	1.056	1.026	258.9	267.6	259.6	262.8	238.3	252.7	260.4	275.8	273.5	265.7	0.299	0.599176	0.958	-0.561	0.332256	0.996
O60921	HUS1	Checkpoint protein HUS1 OS=Homo sapiens OX=9606 GN=HUS1 PE=1 SV=1	6	2	2	2	31.7	1.117	1.041	0.967	1.06	1.084	1.086	1.071	1.036	1.065	467.5	522	486.4	451.9	495.4	506.6	507.6	500.9	484.4	498	0.127	0.834407	0.967	0.597	0.335572	0.996
O60925	PFDN1	Prefoldin subunit 1 OS=Homo sapiens OX=9606 GN=PFDN1 PE=1 SV=2	34	5	7	5	14.2	1.065	0.781	0.882	0.871	0.98	0.872	0.875	0.883	0.882	2601.8	2771.1	2031.1	2294.1	2267.1	2549.3	2267.8	2276.4	2298.3	2295.4	-0.622	0.430466	0.946	-0.283	0.716145	0.997
O60927	PPP1R11	E3 ubiquitin-protein ligase PPP1R11 OS=Homo sapiens OX=9606 GN=PPP1R11 PE=1 SV=1	21	1	1	1	13.9	1.162	1.015	0.901	1.306	1.045	1.124	1.142	1.162	0.909	53.9	62.6	54.7	48.5	70.3	56.3	60.6	61.5	62.6	48.9	0.449	0.65212	0.961	1.37	0.187386	0.994
O60934	NBN	Nibrin OS=Homo sapiens OX=9606 GN=NBN PE=1 SV=1	5	3	3	3	84.9	0.988	0.78	0.98	0.828	0.83	0.854	0.86	1.09	1.058	268.2	264.9	209.2	262.8	221.9	222.5	229	230.7	292.4	283.7	0.67	0.395293	0.942	-1	0.212896	0.994
O60936	NOL3	Nucleolar protein 3 OS=Homo sapiens OX=9606 GN=NOL3 PE=1 SV=2	34	4	5	4	22.6	0.919	0.991	1.295	0.916	0.839	0.761	1.025	0.784	0.976	40.2	36.9	39.8	52	36.8	33.7	30.6	41.2	31.5	39.2	-1.1	0.263058	0.921	-2.1	0.0469502	0.984
O60942	RNGTT	mRNA-capping enzyme OS=Homo sapiens OX=9606 GN=RNGTT PE=1 SV=1	3	2	2	2	68.5	0.866	0.864	1.062	1.064	0.826	0.771	0.8	0.979	0.971	276.7	239.7	239.1	293.9	294.4	228.4	213.3	221.3	270.8	268.7	-0.262	0.787547	0.966	-0.29	0.765252	0.997
O75027	ABCB7	ATP-binding cassette sub-family B member 7, mitochondrial OS=Homo sapiens OX=9606 GN=ABCB7 PE=1 SV=2	9	6	6	6	82.6	0.948	0.768	1.016	0.913	0.808	0.991	1.006	1.073	1.045	557.4	528.3	428.2	566.1	509	450.5	552.3	560.4	597.8	582.5	1.23	0.11151	0.846	-0.174	0.810914	0.997
O75044	SRGAP2	SLIT-ROBO Rho GTPase-activating protein 2 OS=Homo sapiens OX=9606 GN=SRGAP2 PE=1 SV=3	4	4	5	3	120.8	0.988	0.965	1.003	1.108	1.06	1.148	1.102	1.072	1.117	386.2	381.6	372.7	387.5	427.7	409.3	443.3	425.7	414	431.5	1.17	0.043264	0.682	1.5	0.0139507	0.96
O75063	FAM20B	Glycosaminoglycan xylosylkinase OS=Homo sapiens OX=9606 GN=FAM20B PE=1 SV=1	15	4	4	4	46.4	0.865	1.186	0.915	1.113	0.94	0.96	1.197	0.917	0.849	238.9	206.7	283.3	218.6	266	224.6	229.4	286.1	219.1	202.8	0.113	0.922436	0.97	0.435	0.709114	0.997
O75083	WDR1	WD repeat-containing protein 1 OS=Homo sapiens OX=9606 GN=WDR1 PE=1 SV=4	39	17	33	17	66.2	0.984	1.164	1.031	0.941	1.017	0.964	0.929	0.956	1.034	5278.3	5191.6	6141.8	5444.3	4968.4	5368.1	5088.7	4902.3	5044	5455.7	-1.02	0.133668	0.866	-0.811	0.222581	0.994
O75116	ROCK2	Rho-associated protein kinase 2 OS=Homo sapiens OX=9606 GN=ROCK2 PE=1 SV=4	8	11	12	9	160.8	0.907	0.861	0.929	1.012	0.803	1.075	1.071	1.104	1.124	816	740.2	702.5	757.8	825.8	655.1	877.6	874.2	900.6	917.3	2.15	0.0157656	0.407	0.915	0.245325	0.995
O75127	PTCD1	Pentatricopeptide repeat-containing protein 1, mitochondrial OS=Homo sapiens OX=9606 GN=PTCD1 PE=1 SV=2	2	2	3	2	78.8	1.122	0.934	0.934	0.906	0.929	0.935	0.902	0.905	1.002	935.8	1049.8	874.5	874.2	847.8	869	875.3	843.8	846.8	937.8	-0.845	0.250597	0.918	-0.899	0.223571	0.994
O75128	COBL	Protein cordon-bleu OS=Homo sapiens OX=9606 GN=COBL PE=1 SV=2	3	3	4	3	135.5	1.297	1.244	0.766	1.379	1.349	1.454	1.552	0.814	0.886	188.8	244.8	234.9	144.6	260.4	254.7	274.5	293	153.7	167.3	-0.716	0.639549	0.96	2.15	0.177619	0.994
O75131	CPNE3	Copine-3 OS=Homo sapiens OX=9606 GN=CPNE3 PE=1 SV=1	21	11	17	10	60.1	1.023	1.044	1.003	0.989	0.996	0.999	0.947	0.955	0.941	3007.5	3076.9	3140.7	3015.9	2975.4	2995.7	3003.4	2846.8	2872.6	2828.9	-0.992	0.0614999	0.756	-0.241	0.620186	0.997
O75143	ATG13	Autophagy-related protein 13 OS=Homo sapiens OX=9606 GN=ATG13 PE=1 SV=1	4	2	2	2	56.5	1.023	0.975	0.946	0.963	1.015	0.968	1.038	0.967	1.008	456.6	467.1	445	431.8	439.7	463.5	441.8	473.9	441.5	460.2	0.178	0.759289	0.965	0.0405	0.944358	0.998
O75145	PPFIA3	Liprin-alpha-3 OS=Homo sapiens OX=9606 GN=PPFIA3 PE=1 SV=3	3	3	3	3	133.4	0.963	0.997	1.3	1.123	0.943	0.947	0.981	1.184	1.029	353.3	340.1	352.3	459.3	396.6	333.3	334.8	346.6	418.4	363.7	-0.0634	0.945564	0.97	-0.503	0.590736	0.997
O75146	HIP1R	Huntingtin-interacting protein 1-related protein OS=Homo sapiens OX=9606 GN=HIP1R PE=1 SV=2	4	4	5	4	119.3	0.814	1.008	0.959	0.936	0.891	0.963	1.061	0.946	1.059	252.1	205.3	254.2	241.9	235.9	224.7	242.7	267.5	238.5	266.9	0.971	0.196567	0.901	-0.0156	0.982674	0.998
O75150	RNF40	E3 ubiquitin-protein ligase BRE1B OS=Homo sapiens OX=9606 GN=RNF40 PE=1 SV=5	17	15	16	15	113.6	0.96	0.868	0.959	1.02	0.922	0.96	0.993	0.985	0.996	2014.9	1934.2	1749	1932.9	2055.4	1858.5	1934.4	2001.3	1985.3	2006.9	0.59	0.300279	0.929	0.469	0.405619	0.996
O75151	PHF2	Lysine-specific demethylase PHF2 OS=Homo sapiens OX=9606 GN=PHF2 PE=1 SV=4	2	2	3	1	120.7	1.059	0.89	0.926	1.084	0.837	1.079	0.971	1	1.125	338.6	358.5	301.4	313.6	367.1	283.4	365.3	328.7	338.6	380.9	0.583	0.526138	0.953	0.597	0.516778	0.997
O75152	ZC3H11A	Zinc finger CCCH domain-containing protein 11A OS=Homo sapiens OX=9606 GN=ZC3H11A PE=1 SV=3	27	18	23	18	89.1	1.126	1.012	0.894	1.096	1.031	1.103	1.218	0.991	0.994	2318.3	2609.8	2345.1	2072.1	2540.2	2391	2558.2	2823.6	2297.3	2303.7	0.411	0.644947	0.96	0.916	0.314611	0.995
O75153	CLUH	Clustered mitochondria protein homolog OS=Homo sapiens OX=9606 GN=CLUH PE=1 SV=2	20	24	29	24	146.6	0.937	0.876	1.05	0.962	0.924	0.951	0.935	1.066	0.958	3913.9	3666.1	3427.3	4107.9	3766	3617.9	3721	3658.2	4171.2	3747.7	0.242	0.710512	0.963	-0.129	0.842844	0.998
O75157	TSC22D2	TSC22 domain family protein 2 OS=Homo sapiens OX=9606 GN=TSC22D2 PE=1 SV=3	8	2	2	2	79.2	0.982	0.868	1.041	1.014	1.043	1.016	1.096	1.021	1.179	178.5	175.4	155	185.8	181.1	186.2	181.5	195.7	182.3	210.6	1.29	0.0635497	0.762	0.798	0.226004	0.994
O75164	KDM4A	Lysine-specific demethylase 4A OS=Homo sapiens OX=9606 GN=KDM4A PE=1 SV=2	1	1	1	1	120.6	0.861	0.929	1.116	0.863	0.785	0.714	0.885	1.028	0.875	53.6	46.2	49.8	59.8	46.3	42.1	38.3	47.5	55.2	46.9	-0.457	0.566918	0.956	-1.71	0.0509592	0.985
O75165	DNAJC13	DnaJ homolog subfamily C member 13 OS=Homo sapiens OX=9606 GN=DNAJC13 PE=1 SV=5	7	13	15	13	254.3	0.965	0.785	1.035	0.911	0.815	0.962	0.98	1.109	1.073	1076.7	1038.9	845.1	1114.1	980.6	877.7	1036.3	1055.6	1193.8	1155.8	1.14	0.138712	0.87	-0.484	0.510727	0.997
O75167	PHACTR2	Phosphatase and actin regulator 2 OS=Homo sapiens OX=9606 GN=PHACTR2 PE=1 SV=2	2	1	2	1	69.7	0.789	0.909	1.169	0.892	0.943	0.921	1.108	1.325	1.113	87.2	68.8	79.3	101.9	77.8	82.2	80.3	96.6	115.5	97.1	2.08	0.038983	0.658	-0.478	0.598251	0.997
O75175	CNOT3	CCR4-NOT transcription complex subunit 3 OS=Homo sapiens OX=9606 GN=CNOT3 PE=1 SV=1	4	3	4	3	81.8	1.128	0.854	0.982	0.919	0.817	0.833	0.956	1.068	0.728	49.7	56	42.4	48.8	45.7	40.6	41.4	47.5	53	36.2	-0.622	0.498552	0.952	-1.51	0.11853	0.992
O75179	ANKRD17	Ankyrin repeat domain-containing protein 17 OS=Homo sapiens OX=9606 GN=ANKRD17 PE=1 SV=3	6	11	13	6	274.1	0.943	0.865	0.868	0.991	0.814	1.074	1.011	0.991	0.993	233.3	219.9	201.8	202.5	231.1	189.9	250.6	235.8	231.1	231.7	1.07	0.17801	0.893	0.869	0.266359	0.995
O75190	DNAJB6	DnaJ homolog subfamily B member 6 OS=Homo sapiens OX=9606 GN=DNAJB6 PE=1 SV=2	6	2	2	2	36.1	1.187	1.355	1.107	1.21	1.177	1.14	1.245	0.984	0.934	82.9	98.4	112.3	91.8	100.3	97.6	94.5	103.2	81.6	77.4	-1.45	0.107448	0.841	0.0837	0.920668	0.998
O75191	XYLB	Xylulose kinase OS=Homo sapiens OX=9606 GN=XYLB PE=1 SV=3	4	1	1	1	58.3	1.083	1.145	1.078	0.878	1.071	0.887	0.852	0.947	1.018	144.7	156.7	165.7	156	127.1	154.9	128.3	123.2	137	147.3	-1.92	0.0275977	0.567	-1.7	0.0458049	0.984
O75208	COQ9	Ubiquinone biosynthesis protein COQ9, mitochondrial OS=Homo sapiens OX=9606 GN=COQ9 PE=1 SV=1	19	4	5	4	35.5	1.003	1.235	1.062	0.867	0.932	0.847	0.907	0.87	1.047	1044.5	1047.2	1289.9	1109.2	905.7	973.4	884.9	947	909	1093.2	-1.68	0.0352924	0.633	-2.25	0.00871855	0.939
O75223	GGCT	Gamma-glutamylcyclotransferase OS=Homo sapiens OX=9606 GN=GGCT PE=1 SV=1	56	10	24	10	21	1.067	1.143	0.985	1.039	1.164	1.056	0.971	0.89	0.857	4912.8	5241.7	5614.4	4838.6	5102.4	5716.6	5189.9	4768.3	4371.2	4210.7	-1.72	0.0217289	0.498	0.421	0.522926	0.997
O75251	NDUFS7	NADH dehydrogenase [ubiquinone] iron-sulfur protein 7, mitochondrial OS=Homo sapiens OX=9606 GN=NDUFS7 PE=1 SV=3	18	4	5	4	23.5	1.082	1.108	1.142	1.018	0.938	0.951	0.896	0.855	1.009	972.7	1052.1	1077.4	1111.2	990.6	912.8	924.8	871.8	832	981.2	-2.18	0.00367521	0.162	-1.48	0.0291824	0.978
O75306	NDUFS2	NADH dehydrogenase [ubiquinone] iron-sulfur protein 2, mitochondrial OS=Homo sapiens OX=9606 GN=NDUFS2 PE=1 SV=2	17	6	6	6	52.5	0.992	0.983	1.109	0.981	0.976	1.018	0.97	0.979	1.012	1056.1	1047.1	1038.4	1171.3	1035.5	1030.5	1074.5	1024.1	1033.5	1068.8	-0.565	0.324062	0.933	-0.3	0.593808	0.997
O75312	ZPR1	Zinc finger protein ZPR1 OS=Homo sapiens OX=9606 GN=ZPR1 PE=1 SV=1	20	9	9	9	50.9	1.099	1.018	1.108	0.944	0.877	0.893	0.965	1.014	0.981	1611.9	1771	1640.3	1786.1	1522.1	1414	1439.9	1556.2	1635.1	1581.5	-1.11	0.0573894	0.742	-1.97	0.00334523	0.852
O75323	NIPSNAP2	Protein NipSnap homolog 2 OS=Homo sapiens OX=9606 GN=NIPSNAP2 PE=1 SV=1	10	3	4	2	33.7	0.772	0.805	1.277	0.684	0.991	0.715	0.74	1.116	1.262	190.4	147	153.3	243.1	130.3	188.7	136.2	140.9	212.6	240.4	0.79	0.587882	0.957	-1.18	0.42156	0.996
O75330	HMMR	Hyaluronan mediated motility receptor OS=Homo sapiens OX=9606 GN=HMMR PE=1 SV=2	3	2	2	2	84	0.932	0.795	0.748	1.112	0.836	1.273	1.02	0.84	0.931	202.9	189.1	161.4	151.8	225.7	169.7	258.4	207	170.4	188.9	0.879	0.415354	0.944	2.36	0.0456297	0.984
O75340	PDCD6	Programmed cell death protein 6 OS=Homo sapiens OX=9606 GN=PDCD6 PE=1 SV=1	23	4	5	4	21.9	0.984	1.021	1.041	1.053	1.144	1.002	0.986	0.979	1.06	547	538.3	558.2	569.3	576.1	625.8	548.3	539.3	535.3	579.7	-0.197	0.73066	0.964	0.708	0.231823	0.995
O75347	TBCA	Tubulin-specific chaperone A OS=Homo sapiens OX=9606 GN=TBCA PE=1 SV=3	33	4	8	4	12.8	0.95	0.94	1.076	0.847	0.91	0.874	0.827	0.937	0.975	2019.8	1917.9	1899.6	2173.6	1711.8	1837.9	1765.7	1670	1893.4	1968.9	-0.933	0.163054	0.885	-1.26	0.0685772	0.988
O75348	ATP6V1G1	V-type proton ATPase subunit G 1 OS=Homo sapiens OX=9606 GN=ATP6V1G1 PE=1 SV=3	24	3	5	3	13.7	1.09	1.065	1.072	1.024	0.957	1.195	1.146	1.008	0.935	262.4	286.1	279.5	281.3	268.8	251.2	313.7	300.7	264.4	245.2	-0.6	0.479531	0.95	-0.204	0.80789	0.997
O75351	VPS4B	Vacuolar protein sorting-associated protein 4B OS=Homo sapiens OX=9606 GN=VPS4B PE=1 SV=2	19	8	12	6	49.3	1.049	1.04	0.96	1.031	0.997	1.011	0.986	0.967	1.021	917.4	962.3	954.3	880.9	945.5	914.4	927.8	904.2	887.1	936.4	-0.416	0.455549	0.948	0.0961	0.861069	0.998
O75367	MACROH2A1	Core histone macro-H2A.1 OS=Homo sapiens OX=9606 GN=MACROH2A1 PE=1 SV=4	39	11	21	9	39.6	0.945	0.974	0.929	1.108	1.05	1.098	1.001	0.985	0.957	3263.7	3084.1	3178.6	3031.5	3617.7	3428.4	3584.4	3268	3214.8	3124.8	0.325	0.538464	0.954	1.77	0.00601938	0.915
O75368	SH3BGRL	SH3 domain-binding glutamic acid-rich-like protein OS=Homo sapiens OX=9606 GN=SH3BGRL PE=1 SV=1	60	5	8	5	12.8	1.07	0.784	1.188	1.081	0.854	1.098	0.963	0.903	0.656	1235.8	1322	969.3	1468.1	1336	1054.8	1356.6	1190	1116	810.6	-1.65	0.159209	0.883	0.0399	0.971331	0.998
O75369	FLNB	Filamin-B OS=Homo sapiens OX=9606 GN=FLNB PE=1 SV=2	37	75	121	68	278	0.971	1.382	1.119	1.05	1.188	1.095	1.266	0.83	0.856	18114.2	17587.9	25032.1	20260.8	19018.5	21515.6	19834.5	22926.9	15038.6	15499.4	-1.42	0.236654	0.914	0.2	0.862993	0.998
O75376	NCOR1	Nuclear receptor corepressor 1 OS=Homo sapiens OX=9606 GN=NCOR1 PE=1 SV=2	0	1	1	1	270	0.815	0.386	0.786	1.059	0.465	1.063	0.905	1.221	0.854	146.4	119.4	56.5	115.1	155.1	68.1	155.7	132.5	178.8	125	2.19	0.111221	0.846	1.92	0.156229	0.993
O75381	PEX14	Peroxisomal membrane protein PEX14 OS=Homo sapiens OX=9606 GN=PEX14 PE=1 SV=1	11	4	4	4	41.2	0.895	0.942	1.052	0.893	0.97	0.949	0.915	1.074	1.143	941.3	842.8	886.3	989.9	840.2	913.1	893.6	861	1010.4	1076.2	0.724	0.345481	0.936	-0.288	0.702182	0.997
O75382	TRIM3	Tripartite motif-containing protein 3 OS=Homo sapiens OX=9606 GN=TRIM3 PE=1 SV=2	13	8	9	8	80.8	1.27	1.242	0.662	1.438	1.282	1.618	1.349	0.581	0.57	818.5	1039.4	1016.8	541.5	1177	1049.3	1324.5	1103.8	475.2	466.7	-1.58	0.35869	0.938	2.47	0.163832	0.993
O75390	CS	Citrate synthase, mitochondrial OS=Homo sapiens OX=9606 GN=CS PE=1 SV=2	24	11	34	11	51.7	0.983	1.099	1.037	0.961	0.971	0.961	0.936	0.98	0.988	5914.5	5814.3	6498.2	6133.3	5685.9	5742.4	5682.4	5535.4	5795.2	5845.1	-0.908	0.107835	0.842	-0.793	0.154076	0.993
O75391	SPAG7	Sperm-associated antigen 7 OS=Homo sapiens OX=9606 GN=SPAG7 PE=1 SV=2	29	5	6	5	26	0.964	0.932	0.926	0.939	0.941	0.891	0.907	0.994	0.964	918.7	885.3	856.6	850.3	862.9	864.5	818.8	833	913.3	885.6	0.0384	0.940522	0.97	-0.227	0.660339	0.997
O75394	MRPL33	39S ribosomal protein L33, mitochondrial OS=Homo sapiens OX=9606 GN=MRPL33 PE=1 SV=1	17	1	1	1	7.6	0.942	1.282	1.029	1.131	1.071	1.005	1.109	1.065	1.055	367.9	346.7	471.7	378.7	416.2	394	369.9	408.1	392	388.1	0.239	0.761668	0.965	0.377	0.633677	0.997
O75396	SEC22B	Vesicle-trafficking protein SEC22b OS=Homo sapiens OX=9606 GN=SEC22B PE=1 SV=4	34	6	9	6	24.6	0.949	1.048	0.982	0.997	0.956	1.021	0.909	1.033	1.176	880.2	834.9	922.1	864.5	877.7	841.5	898.7	799.7	909.5	1035.1	0.3	0.677662	0.962	0.126	0.860838	0.998
O75410	TACC1	Transforming acidic coiled-coil-containing protein 1 OS=Homo sapiens OX=9606 GN=TACC1 PE=1 SV=2	13	6	8	6	87.7	1.092	1.026	0.944	1.151	0.848	0.99	1.106	1.106	0.952	340.5	371.9	349.2	321.3	391.9	288.6	337.1	376.6	376.7	324.1	0.331	0.72942	0.964	-0.193	0.839688	0.998
O75414	NME6	Nucleoside diphosphate kinase 6 OS=Homo sapiens OX=9606 GN=NME6 PE=1 SV=3	7	1	1	1	21.1	1.057	1.204	1.336	0.869	1.161	1.207	1.165	1.201	1.183	41.3	43.7	49.8	55.2	35.9	48	49.9	48.1	49.6	48.9	0.0334	0.972103	0.971	-0.906	0.352902	0.996
O75419	CDC45	Cell division control protein 45 homolog OS=Homo sapiens OX=9606 GN=CDC45 PE=1 SV=1	5	3	4	3	65.5	0.994	0.857	1.005	0.907	0.979	0.912	0.98	1.104	1.005	359.9	357.8	308.3	361.7	326.4	352.3	328.2	352.8	397.4	361.7	0.715	0.278146	0.924	-0.327	0.611024	0.997
O75420	GIGYF1	GRB10-interacting GYF protein 1 OS=Homo sapiens OX=9606 GN=GIGYF1 PE=1 SV=2	4	4	4	4	114.5	1.022	1.012	0.914	1.104	1.112	1.066	1.226	1.057	1.043	294.7	301.3	298.1	269.4	325.2	327.6	314.2	361.4	311.4	307.4	1.18	0.105609	0.839	1.42	0.0584344	0.987
O75427	LRCH4	Leucine-rich repeat and calponin homology domain-containing protein 4 OS=Homo sapiens OX=9606 GN=LRCH4 PE=1 SV=2	7	4	4	4	73.4	0.955	1.007	1.062	1.061	1.029	1.038	1.137	1.109	1.192	360.3	344.2	362.8	382.8	382.2	370.8	374	409.7	399.7	429.3	1.34	0.0277001	0.568	0.625	0.260005	0.995
O75431	MTX2	Metaxin-2 OS=Homo sapiens OX=9606 GN=MTX2 PE=1 SV=1	11	3	3	3	29.7	0.924	0.943	0.946	0.931	1.058	0.949	0.869	0.878	0.968	229.7	212.3	216.7	217.2	213.9	243.1	217.9	199.6	201.6	222.4	-0.432	0.491708	0.951	0.536	0.396552	0.996
O75436	VPS26A	Vacuolar protein sorting-associated protein 26A OS=Homo sapiens OX=9606 GN=VPS26A PE=1 SV=2	20	5	9	4	38.1	1.03	1.062	0.963	1.007	1.15	0.99	1.006	0.976	1	695.9	716.5	739.1	670.5	700.8	800	689	700	679.5	695.7	-0.363	0.571075	0.956	0.413	0.520584	0.997
O75438	NDUFB1	NADH dehydrogenase [ubiquinone] 1 beta subcomplex subunit 1 OS=Homo sapiens OX=9606 GN=NDUFB1 PE=1 SV=1	33	2	2	2	7	1.147	1.205	1.073	0.985	0.918	0.94	0.892	0.885	0.984	555.3	637.1	668.9	596	547.2	509.6	522.3	495.5	491.2	546.7	-2.42	0.00147974	0.0604	-1.98	0.00529656	0.904
O75439	PMPCB	Mitochondrial-processing peptidase subunit beta OS=Homo sapiens OX=9606 GN=PMPCB PE=1 SV=2	30	12	20	12	54.3	1.035	1.186	1.066	0.942	1.056	0.956	0.941	0.943	1.069	2742.7	2839.9	3251.6	2924.6	2582.9	2895.4	2622.3	2581.2	2585.8	2931.5	-1.3	0.0727797	0.785	-1.09	0.124148	0.992
O75446	SAP30	Histone deacetylase complex subunit SAP30 OS=Homo sapiens OX=9606 GN=SAP30 PE=1 SV=1	13	3	4	3	23.3	1.2	1.024	0.792	1.249	1.251	1.276	1.27	0.922	0.826	220	264.1	225.3	174.2	274.9	275.3	280.7	279.5	202.9	181.8	-0.207	0.864892	0.968	2.28	0.0830293	0.99
O75449	KATNA1	Katanin p60 ATPase-containing subunit A1 OS=Homo sapiens OX=9606 GN=KATNA1 PE=1 SV=1	6	3	4	3	55.9	1.064	1.05	1.072	0.935	0.93	0.939	0.897	0.988	0.96	674.4	717.3	707.9	722.7	630.7	627.3	633	605.2	666.4	647.7	-1.45	0.0142863	0.394	-1.51	0.0115747	0.953
O75475	PSIP1	PC4 and SFRS1-interacting protein OS=Homo sapiens OX=9606 GN=PSIP1 PE=1 SV=1	13	7	9	7	60.1	0.884	0.44	0.621	1.046	0.41	1.25	1.229	0.937	1.012	1676.7	1482	738.1	1041.1	1754.6	687.9	2096.4	2060	1570.9	1696.5	2.87	0.0640682	0.763	2.29	0.127174	0.992
O75477	ERLIN1	Erlin-1 OS=Homo sapiens OX=9606 GN=ERLIN1 PE=1 SV=2	22	7	10	4	39.1	1.088	1.045	0.925	1.091	1.001	1.033	0.946	1.002	0.967	272	296	284.1	251.5	296.7	272.3	281	257.3	272.4	263.1	-0.682	0.308002	0.93	0.418	0.524998	0.997
O75489	NDUFS3	NADH dehydrogenase [ubiquinone] iron-sulfur protein 3, mitochondrial OS=Homo sapiens OX=9606 GN=NDUFS3 PE=1 SV=1	30	7	10	7	30.2	0.991	1.059	1.039	0.998	0.953	0.95	0.891	0.941	1.032	1397	1383.9	1479.2	1451.4	1394.6	1331.8	1326.5	1245	1314.2	1441.1	-1.01	0.101321	0.834	-0.663	0.261758	0.995
O75494	SRSF10	Serine/arginine-rich splicing factor 10 OS=Homo sapiens OX=9606 GN=SRSF10 PE=1 SV=1	14	4	4	4	31.3	0.954	0.867	0.938	1.155	0.896	1.219	1.043	1.007	0.946	413.2	394	358.3	387.5	477.2	370.4	503.7	430.9	416.2	390.8	0.848	0.350469	0.937	1.82	0.0612427	0.987
O75496	GMNN	Geminin OS=Homo sapiens OX=9606 GN=GMNN PE=1 SV=1	4	1	1	1	23.6	1.202	1.305	1.114	1.2	1.151	1.16	1.172	1.141	1.182	113.2	136	147.7	126	135.9	130.2	131.2	132.6	129.1	133.8	-0.24	0.655189	0.961	0.0657	0.902328	0.998
O75503	CLN5	Ceroid-lipofuscinosis neuronal protein 5 OS=Homo sapiens OX=9606 GN=CLN5 PE=1 SV=2	3	1	1	1	41.5	1.053	0.919	0.887	1.191	1.158	1.054	0.998	0.9	0.914	162.5	171.2	149.4	144.2	193.5	188.2	171.4	162.3	146.3	148.6	-0.283	0.690663	0.962	2.01	0.0153997	0.963
O75509	TNFRSF21	Tumor necrosis factor receptor superfamily member 21 OS=Homo sapiens OX=9606 GN=TNFRSF21 PE=1 SV=1	1	1	1	1	71.8	0.948	0.871	1.032	0.925	0.761	0.865	0.815	1.184	1.168	280.3	265.9	244.1	289.3	259.3	213.2	242.4	228.6	332	327.5	0.884	0.366906	0.939	-1.04	0.291023	0.995
O75521	ECI2	Enoyl-CoA delta isomerase 2 OS=Homo sapiens OX=9606 GN=ECI2 PE=1 SV=4	19	5	5	5	43.6	0.815	2.234	1.345	0.826	1.239	0.982	1.065	1.217	1.379	90	73.3	201.1	121.1	74.4	111.5	88.4	95.8	109.5	124.1	0.182	0.904267	0.969	-1.51	0.330313	0.996
O75528	TADA3	Transcriptional adapter 3 OS=Homo sapiens OX=9606 GN=TADA3 PE=1 SV=1	6	2	2	2	48.9	0.919	0.963	1	0.956	1.14	1.001	0.909	0.994	1.016	249.2	229	240.1	249.1	238.1	284	249.4	226.6	247.7	253.1	0.0242	0.971686	0.971	0.885	0.211967	0.994
O75530	EED	Polycomb protein EED OS=Homo sapiens OX=9606 GN=EED PE=1 SV=2	15	6	6	6	50.2	1.001	0.969	1.023	1.012	1.03	0.996	1.057	1.026	1.029	996.6	997.7	965.6	1019.3	1008.9	1026.1	993	1053.3	1022.5	1025.6	0.395	0.445658	0.947	0.299	0.561098	0.997
O75531	BANF1	Barrier-to-autointegration factor OS=Homo sapiens OX=9606 GN=BANF1 PE=1 SV=1	52	4	6	4	10.1	0.895	0.942	0.916	0.926	1.061	0.947	0.906	0.998	1.041	505.7	452.9	476.3	463.3	468.3	536.4	478.8	458	504.6	526.7	0.593	0.37648	0.94	0.731	0.280021	0.995
O75533	SF3B1	Splicing factor 3B subunit 1 OS=Homo sapiens OX=9606 GN=SF3B1 PE=1 SV=3	21	20	29	20	145.7	1.022	0.765	0.97	0.993	0.936	1.033	1.019	1.074	1.005	4146.5	4236.5	3171.8	4022.5	4117.1	3881	4284.1	4226	4454.1	4165.5	1.01	0.176047	0.892	0.633	0.383227	0.996
O75534	CSDE1	Cold shock domain-containing protein E1 OS=Homo sapiens OX=9606 GN=CSDE1 PE=1 SV=2	26	19	24	19	88.8	1.046	1.016	1.029	0.878	0.934	0.914	0.938	0.985	1.045	3870.5	4049	3932.1	3982.3	3397.9	3616.2	3539.5	3630.9	3813.7	4045.2	-0.659	0.234746	0.914	-1.47	0.0181195	0.967
O75554	WBP4	WW domain-binding protein 4 OS=Homo sapiens OX=9606 GN=WBP4 PE=1 SV=1	3	1	1	1	42.5	1.108	1.002	0.951	1.109	0.959	1.116	1.132	1.204	1.113	172.5	191.2	172.8	164	191.4	165.5	192.5	195.3	207.7	192	1.2	0.128002	0.862	0.576	0.445919	0.996
O75564	JRK	Jerky protein homolog OS=Homo sapiens OX=9606 GN=JRK PE=1 SV=3	1	1	1	1	61.8	1.084	1.081	1.121	1.274	1.174	1.043	1.374	1.244	1.324	81.9	88.8	88.6	91.8	104.4	96.2	85.5	112.6	102	108.5	1.32	0.0470377	0.701	0.649	0.292942	0.995
O75569	PRKRA	Interferon-inducible double-stranded RNA-dependent protein kinase activator A OS=Homo sapiens OX=9606 GN=PRKRA PE=1 SV=1	8	2	2	2	34.4	1.009	1.201	1.149	1.076	1.164	1.087	1.033	0.917	1.088	193.3	195.1	232.1	222.2	208	225	210.1	199.6	177.2	210.2	-1.07	0.144818	0.874	0.241	0.728233	0.997
O75582	RPS6KA5	Ribosomal protein S6 kinase alpha-5 OS=Homo sapiens OX=9606 GN=RPS6KA5 PE=1 SV=1	3	3	4	1	89.8	1.115	1.115	0.929	1.101	1.115	1.024	1.126	1.018	1.084	100.6	112.2	112.2	93.5	110.8	112.2	103	113.3	102.5	109.1	0.207	0.779955	0.966	0.525	0.483137	0.997
O75592	MYCBP2	E3 ubiquitin-protein ligase MYCBP2 OS=Homo sapiens OX=9606 GN=MYCBP2 PE=1 SV=4	1	3	3	3	513.3	1.13	0.843	0.993	0.991	1.05	0.982	0.945	0.927	1.053	261.3	295.3	220.3	259.4	258.9	274.4	256.7	246.9	242.4	275.1	-0.4	0.617774	0.959	0.239	0.764761	0.997
O75600	GCAT	2-amino-3-ketobutyrate coenzyme A ligase, mitochondrial OS=Homo sapiens OX=9606 GN=GCAT PE=1 SV=1	8	2	2	2	45.3	0.803	1.447	0.933	1.143	1.286	1.065	1.123	0.795	0.929	82.2	66	118.9	76.7	93.9	105.7	87.6	92.3	65.4	76.4	-0.439	0.73132	0.964	1.76	0.187629	0.994
O75607	NPM3	Nucleoplasmin-3 OS=Homo sapiens OX=9606 GN=NPM3 PE=1 SV=3	8	1	1	1	19.3	0.973	1.046	1.048	0.913	0.721	0.82	0.819	0.998	0.906	165.7	161.2	173.3	173.6	151.3	119.4	135.9	135.7	165.3	150.1	-1.31	0.062136	0.757	-2.06	0.00809151	0.935
O75608	LYPLA1	Acyl-protein thioesterase 1 OS=Homo sapiens OX=9606 GN=LYPLA1 PE=1 SV=1	25	5	10	5	24.7	1.182	1.14	1.027	1.097	1.08	1.09	1.011	0.851	0.891	1586	1875.1	1808	1628.2	1740.1	1712.4	1728.9	1603.6	1350.1	1413.5	-2.04	0.0119055	0.368	0.0408	0.952477	0.998
O75616	ERAL1	GTPase Era, mitochondrial OS=Homo sapiens OX=9606 GN=ERAL1 PE=1 SV=2	20	7	9	7	48.3	1.001	1.104	0.962	1.002	1.009	1.013	0.947	0.921	1.18	889.9	890.6	982.4	856.3	891.6	897.9	901.8	843.1	819.3	1050.5	-0.305	0.683856	0.962	0.0206	0.977939	0.998
O75643	SNRNP200	U5 small nuclear ribonucleoprotein 200 kDa helicase OS=Homo sapiens OX=9606 GN=SNRNP200 PE=1 SV=2	19	38	56	38	244.4	0.985	0.822	0.933	0.957	0.96	1.005	0.981	1.041	1.002	8419.3	8293.8	6917.5	7854.5	8053.9	8079.7	8459.3	8258.6	8767.4	8439	0.882	0.149055	0.877	0.624	0.294437	0.995
O75648	TRMU	Mitochondrial tRNA-specific 2-thiouridylase 1 OS=Homo sapiens OX=9606 GN=TRMU PE=1 SV=2	13	4	6	4	47.7	1.015	1.168	1.059	0.923	1.165	0.837	0.956	1.148	1.243	442.9	449.4	517.2	469.2	408.6	515.8	370.6	423.3	508.4	550.3	0.0977	0.920696	0.97	-1.14	0.26223	0.995
O75663	TIPRL	TIP41-like protein OS=Homo sapiens OX=9606 GN=TIPRL PE=1 SV=2	18	5	8	5	31.4	1.012	1.002	1.128	0.934	1.041	0.964	0.942	1.039	1.037	1789.6	1810.9	1793.5	2018.7	1671.7	1862.1	1724.2	1684.9	1860.2	1855.7	-0.574	0.374412	0.94	-0.706	0.279213	0.995
O75674	TOM1L1	TOM1-like protein 1 OS=Homo sapiens OX=9606 GN=TOM1L1 PE=1 SV=2	13	3	4	3	53	1.148	1.054	0.999	1.097	1.069	0.995	1.087	0.894	1.059	390	447.7	411.2	389.6	427.8	417	388.2	424	348.7	413	-0.633	0.426085	0.945	0.0587	0.940277	0.998
O75688	PPM1B	Protein phosphatase 1B OS=Homo sapiens OX=9606 GN=PPM1B PE=1 SV=1	9	3	3	2	52.6	0.953	1.027	1.02	1.019	1.024	1.068	1.014	0.935	0.993	299.1	285.2	307.1	305.1	304.9	306.4	319.5	303.3	279.7	296.9	-0.264	0.647366	0.96	0.627	0.289463	0.995
O75691	UTP20	Small subunit processome component 20 homolog OS=Homo sapiens OX=9606 GN=UTP20 PE=1 SV=3	1	2	2	2	318.2	0.392	0.65	0.38	2.067	0.799	1.162	0.475	1.448	1.335	12.8	5	8.4	4.9	26.5	10.3	14.9	6.1	18.6	17.1	3.75	0.0627094	0.759	4.62	0.0273893	0.977
O75694	NUP155	Nuclear pore complex protein Nup155 OS=Homo sapiens OX=9606 GN=NUP155 PE=1 SV=1	13	13	18	13	155.1	1	1.005	0.981	1.148	1.115	1.143	1.001	0.989	0.92	1861.6	1861.8	1870.4	1825.5	2137.6	2074.8	2128.1	1862.8	1840.5	1711.7	-0.331	0.531524	0.954	1.67	0.00848873	0.938
O75695	RP2	Protein XRP2 OS=Homo sapiens OX=9606 GN=RP2 PE=1 SV=4	2	1	1	1	39.6	0.998	0.894	1.102	0.955	1.038	0.986	0.909	1.23	1.015	121.6	121.4	108.7	134	116.1	126.2	119.9	110.5	149.5	123.4	0.278	0.749662	0.965	-0.00631	0.994213	0.998
O75717	WDHD1	WD repeat and HMG-box DNA-binding protein 1 OS=Homo sapiens OX=9606 GN=WDHD1 PE=1 SV=1	21	19	23	19	125.9	1.12	0.955	0.858	1.111	1.047	1.074	1.188	0.959	0.895	3060.6	3426.4	2922	2626.1	3401.2	3205.6	3286.9	3636.3	2935.4	2740.2	0.238	0.808439	0.967	1.26	0.215479	0.994
O75746	SLC25A12	Calcium-binding mitochondrial carrier protein Aralar1 OS=Homo sapiens OX=9606 GN=SLC25A12 PE=1 SV=2	12	7	9	4	74.7	0.972	1.166	0.988	1.039	1.122	0.983	1.193	1.026	1.033	546.5	531	637.2	540	568	613.1	537.1	652	560.9	564.5	0.46	0.560327	0.956	0.343	0.66245	0.997
O75787	ATP6AP2	Renin receptor OS=Homo sapiens OX=9606 GN=ATP6AP2 PE=1 SV=2	10	3	3	3	39	1.007	1.087	0.995	1.193	1.065	1.196	1.073	1.081	0.956	215.1	216.6	233.7	214.1	256.5	229	257.2	230.7	232.4	205.5	0.0916	0.890058	0.969	1.37	0.0604512	0.987
O75792	RNASEH2A	Ribonuclease H2 subunit A OS=Homo sapiens OX=9606 GN=RNASEH2A PE=1 SV=2	19	4	5	4	33.4	1.14	0.909	0.947	1.044	1.091	1.016	0.942	1.011	0.9	615	700.9	558.8	582.7	641.9	671.2	624.9	579.4	621.9	553.5	-0.617	0.413194	0.944	0.761	0.317538	0.996
O75794	CDC123	Cell division cycle protein 123 homolog OS=Homo sapiens OX=9606 GN=CDC123 PE=1 SV=1	8	2	2	2	39.1	1.164	0.993	1.043	1.008	0.932	0.986	0.999	1.042	0.989	394.6	459.3	392	411.7	398	367.9	389	394.2	411.2	390.4	-0.668	0.300011	0.929	-0.927	0.160185	0.993
O75808	CAPN15	Calpain-15 OS=Homo sapiens OX=9606 GN=CAPN15 PE=1 SV=1	2	1	1	1	117.2	0.912	0.844	1.081	1.041	0.942	0.892	0.956	1.005	0.989	66.5	60.6	56.1	71.9	69.2	62.6	59.3	63.5	66.8	65.8	0.267	0.7221	0.963	0.157	0.833897	0.998
O75817	POP7	Ribonuclease P protein subunit p20 OS=Homo sapiens OX=9606 GN=POP7 PE=1 SV=2	11	1	1	1	15.6	1.059	1.132	0.981	0.969	1.061	1.113	1.137	1.119	1.003	137.4	145.5	155.6	134.9	133.2	145.9	153	156.2	153.8	137.9	0.287	0.702752	0.963	0.0407	0.956739	0.998
O75818	RPP40	Ribonuclease P protein subunit p40 OS=Homo sapiens OX=9606 GN=RPP40 PE=1 SV=3	8	2	2	2	41.8	1.113	1.09	1.197	0.968	1.035	1	0.956	1.011	1.039	459.6	511.5	501.1	550.4	444.8	475.9	459.8	439.4	464.7	477.5	-1.46	0.0197375	0.469	-1.25	0.0398577	0.982
O75821	EIF3G	Eukaryotic translation initiation factor 3 subunit G OS=Homo sapiens OX=9606 GN=EIF3G PE=1 SV=2	33	8	10	8	35.6	1.053	1.011	0.994	0.999	1.005	0.974	0.998	1.005	1.093	1642.1	1729.4	1659.4	1632.5	1640.7	1650	1598.8	1639.4	1649.9	1794.6	-0.00934	0.98589	0.971	-0.242	0.648507	0.997
O75822	EIF3J	Eukaryotic translation initiation factor 3 subunit J OS=Homo sapiens OX=9606 GN=EIF3J PE=1 SV=2	31	7	8	7	29	1.085	0.984	0.846	1.08	1.081	1.055	1.046	0.865	0.946	1639.2	1778.7	1613.6	1386.7	1769.7	1771.6	1730.1	1714.7	1418.5	1551.3	-0.306	0.709646	0.963	1.25	0.149752	0.993
O75828	CBR3	Carbonyl reductase [NADPH] 3 OS=Homo sapiens OX=9606 GN=CBR3 PE=1 SV=3	35	6	7	4	30.8	0.954	0.991	1.293	0.943	1.111	0.843	0.893	1.083	0.94	207.7	198.1	205.8	268.4	195.9	230.7	175.1	185.4	224.9	195.2	-0.961	0.355717	0.937	-0.912	0.37978	0.996
O75832	PSMD10	26S proteasome non-ATPase regulatory subunit 10 OS=Homo sapiens OX=9606 GN=PSMD10 PE=1 SV=1	7	2	4	2	24.4	1.045	1.023	0.907	0.981	1.013	1.022	1.05	0.881	0.995	607.8	635	622.1	551.3	596.5	616	621.4	638.4	535.5	604.9	-0.247	0.736648	0.964	0.234	0.74938	0.997
O75843	AP1G2	AP-1 complex subunit gamma-like 2 OS=Homo sapiens OX=9606 GN=AP1G2 PE=1 SV=1	6	5	7	5	87.1	0.76	1.339	1.106	1.026	1.122	1.118	0.914	0.952	1.074	492.7	374.2	659.9	544.9	505.7	552.8	550.7	450.3	469.3	529.1	-0.802	0.467209	0.949	0.744	0.499131	0.997
O75844	ZMPSTE24	CAAX prenyl protease 1 homolog OS=Homo sapiens OX=9606 GN=ZMPSTE24 PE=1 SV=2	5	2	2	2	54.8	0.597	0.652	0.902	1.038	0.713	0.907	0.83	1.127	0.855	409.6	244.7	266.9	369.6	425.3	292.1	371.5	339.9	461.7	350.1	1.53	0.161086	0.884	1.25	0.244826	0.995
O75864	PPP1R37	Protein phosphatase 1 regulatory subunit 37 OS=Homo sapiens OX=9606 GN=PPP1R37 PE=1 SV=4	2	1	1	1	74.7	0.873	0.892	0.941	1.056	0.784	0.847	0.958	0.881	0.861	140.3	122.4	125.1	132.1	148.1	110	118.7	134.3	123.6	120.7	-0.0203	0.979483	0.971	0.132	0.867387	0.998
O75874	IDH1	Isocitrate dehydrogenase [NADP] cytoplasmic OS=Homo sapiens OX=9606 GN=IDH1 PE=1 SV=2	56	19	44	18	46.6	0.983	1.307	0.96	0.964	1.018	1.067	0.952	0.943	0.993	7735.3	7607.4	10110.3	7428.7	7455.7	7873	8255	7366.5	7293.5	7682.8	-1.07	0.196184	0.901	-0.217	0.785595	0.997
O75879	GATB	Glutamyl-tRNA(Gln) amidotransferase subunit B, mitochondrial OS=Homo sapiens OX=9606 GN=GATB PE=1 SV=1	7	4	5	4	61.8	0.963	0.957	1.203	0.949	0.983	0.925	1.026	1.218	1.275	786.6	757.1	752.9	946.5	746.2	773.5	727.6	807.3	958	1002.5	1.15	0.14697	0.876	-0.851	0.271851	0.995
O75880	SCO1	Protein SCO1 homolog, mitochondrial OS=Homo sapiens OX=9606 GN=SCO1 PE=1 SV=1	3	1	1	1	33.8	1.025	1.156	1.013	1.015	1.09	1.067	0.938	1.027	1.251	157.8	161.7	182.5	159.9	160.2	172	168.3	148.1	162	197.5	-0.229	0.759869	0.965	0.176	0.814568	0.997
O75884	RBBP9	Serine hydrolase RBBP9 OS=Homo sapiens OX=9606 GN=RBBP9 PE=1 SV=2	5	1	1	1	21	0.962	1.039	0.959	0.659	0.927	0.776	0.55	0.898	1.333	30.7	29.6	31.9	29.5	20.2	28.5	23.8	16.9	27.6	40.9	-0.591	0.62776	0.959	-1.79	0.161135	0.993
O75886	STAM2	Signal transducing adapter molecule 2 OS=Homo sapiens OX=9606 GN=STAM2 PE=1 SV=1	4	2	2	2	58.1	0.947	1.294	1.366	0.99	0.994	1.006	0.929	1.204	1.194	128.6	121.8	166.4	175.6	127.3	127.8	129.3	119.4	154.8	153.5	-0.55	0.576318	0.957	-1.3	0.201149	0.994
O75896	TUSC2	Tumor suppressor candidate 2 OS=Homo sapiens OX=9606 GN=TUSC2 PE=1 SV=3	8	1	1	1	12.1	1.052	1.266	1.081	1.181	1.167	1.133	0.921	0.935	0.729	249.6	262.6	316.1	269.8	294.7	291.1	282.8	229.9	233.4	181.9	-2.59	0.00140588	0.0565	0.586	0.347982	0.996
O75909	CCNK	Cyclin-K OS=Homo sapiens OX=9606 GN=CCNK PE=1 SV=2	12	4	4	4	64.2	0.879	0.835	1.215	0.896	0.877	0.866	0.888	1.004	0.976	544.9	478.9	455	662.3	488.4	478	471.8	483.9	547.3	531.8	-0.265	0.765795	0.965	-1.03	0.260949	0.995
O75915	ARL6IP5	PRA1 family protein 3 OS=Homo sapiens OX=9606 GN=ARL6IP5 PE=1 SV=1	20	3	4	3	21.6	0.71	0.822	0.872	0.98	0.81	1.04	0.896	1.148	1.056	536.1	380.6	440.5	467.6	525.1	434.2	557.5	480.3	615.4	566.1	2.05	0.0368303	0.644	1.39	0.135261	0.992
O75928	PIAS2	E3 SUMO-protein ligase PIAS2 OS=Homo sapiens OX=9606 GN=PIAS2 PE=1 SV=3	3	1	2	1	68.2	0.829	0.611	0.759	0.921	0.953	0.785	0.987	0.83	0.769	44.8	37.1	27.4	34	41.2	42.7	35.2	44.2	37.2	34.4	0.923	0.208923	0.906	0.993	0.179075	0.994
O75934	BCAS2	Pre-mRNA-splicing factor SPF27 OS=Homo sapiens OX=9606 GN=BCAS2 PE=1 SV=1	20	4	6	4	26.1	1.057	0.987	1.027	1.034	1.047	1.01	1.045	1.051	1.083	1148.2	1213.2	1133.6	1179	1187.2	1201.9	1159.3	1199.6	1206.4	1243.1	0.304	0.55086	0.955	0.213	0.674091	0.997
O75935	DCTN3	Dynactin subunit 3 OS=Homo sapiens OX=9606 GN=DCTN3 PE=1 SV=1	15	3	5	3	21.1	0.961	1.07	1.032	0.877	0.985	0.913	0.927	1.038	0.989	1087	1044.2	1163.2	1122.1	953.4	1071	992.4	1008.1	1127.8	1075.2	-0.495	0.437236	0.946	-1.07	0.110772	0.991
O75937	DNAJC8	DnaJ homolog subfamily C member 8 OS=Homo sapiens OX=9606 GN=DNAJC8 PE=1 SV=2	24	7	14	7	29.8	1.073	1.012	0.952	1.058	1.031	1.031	1.063	0.917	0.977	3033.7	3255	3069.3	2888.9	3208.2	3128.3	3126.8	3224	2782.8	2963	-0.372	0.59025	0.957	0.488	0.482244	0.997
O75940	SMNDC1	Survival of motor neuron-related-splicing factor 30 OS=Homo sapiens OX=9606 GN=SMNDC1 PE=1 SV=1	18	3	4	3	26.7	0.991	0.903	0.905	1.056	1.075	1.098	1.028	0.958	0.927	886.3	878.6	800.5	801.9	936.1	953.1	973.1	910.7	848.9	821.8	0.363	0.547279	0.955	1.78	0.0118644	0.954
O75943	RAD17	Cell cycle checkpoint protein RAD17 OS=Homo sapiens OX=9606 GN=RAD17 PE=1 SV=2	2	1	1	1	77	0.966	0.948	0.957	0.906	1.019	0.875	0.938	0.898	1.045	88.7	85.6	84.1	84.8	80.3	90.4	77.6	83.2	79.6	92.6	-0.0841	0.898979	0.969	-0.25	0.707263	0.997
O75947	ATP5PD	ATP synthase subunit d, mitochondrial OS=Homo sapiens OX=9606 GN=ATP5PD PE=1 SV=3	45	6	10	6	18.5	1.04	1.048	1.08	0.955	0.875	0.906	0.89	1.046	1.078	2426.5	2524.7	2543.6	2621.3	2316.8	2123	2199.1	2160	2538	2616.4	-0.758	0.244601	0.916	-1.68	0.0208419	0.971
O75955	FLOT1	Flotillin-1 OS=Homo sapiens OX=9606 GN=FLOT1 PE=1 SV=3	30	11	12	11	47.3	1.149	0.956	0.934	1.134	1.184	1.093	0.984	0.865	0.819	2168.3	2491.1	2072.9	2026	2459.1	2566.9	2370.1	2132.5	1874.9	1776	-1.27	0.122755	0.857	1.48	0.0770181	0.989
O75956	CDK2AP2	Cyclin-dependent kinase 2-associated protein 2 OS=Homo sapiens OX=9606 GN=CDK2AP2 PE=1 SV=1	6	1	1	1	13.1	1.131	0.733	0.965	0.961	0.699	0.945	1.005	0.945	1.053	164.2	185.7	120.3	158.4	157.8	114.8	155.2	165	155.2	172.9	0.28	0.77227	0.965	-0.848	0.389482	0.996
O75964	ATP5MG	ATP synthase subunit g, mitochondrial OS=Homo sapiens OX=9606 GN=ATP5MG PE=1 SV=3	45	4	11	4	11.4	1.05	1.093	1.127	0.956	0.957	0.961	0.953	1.079	1.084	2441.7	2562.7	2669.4	2751.5	2335.2	2336.3	2346.3	2327.7	2635.3	2647.8	-0.682	0.233474	0.913	-1.45	0.0220352	0.972
O75970	MPDZ	Multiple PDZ domain protein OS=Homo sapiens OX=9606 GN=MPDZ PE=1 SV=2	0	1	1	1	221.5	0.875	0.724	0.876	0.812	0.817	1.011	0.888	1.297	1.237	47.2	41.3	34.2	41.4	38.3	38.6	47.7	41.9	61.2	58.4	2.59	0.0254711	0.544	0.481	0.63795	0.997
O75971	SNAPC5	snRNA-activating protein complex subunit 5 OS=Homo sapiens OX=9606 GN=SNAPC5 PE=1 SV=1	17	1	1	1	11.3	0.843	1.363	0.995	1.051	0.645	0.812	0.724	1.106	0.981	15.7	13.2	21.4	15.6	16.5	10.1	12.8	11.4	17.4	15.4	-0.83	0.53673	0.954	-1.53	0.266478	0.995
O75976	CPD	Carboxypeptidase D OS=Homo sapiens OX=9606 GN=CPD PE=1 SV=2	2	2	3	2	152.8	0.845	0.876	0.831	1.018	0.866	1.028	0.864	0.978	0.93	153.9	130.1	134.8	127.9	156.6	133.3	158.2	132.9	150.4	143.1	0.588	0.388648	0.941	1.36	0.0633186	0.987
O76003	GLRX3	Glutaredoxin-3 OS=Homo sapiens OX=9606 GN=GLRX3 PE=1 SV=2	24	8	13	8	37.4	1.032	0.991	0.981	0.946	1.052	0.945	0.971	1.066	0.979	4416	4556.5	4375.6	4333.7	4175.4	4643.5	4172.4	4288.2	4707.9	4321.4	-0.0637	0.917505	0.97	-0.226	0.714422	0.997
O76021	RSL1D1	Ribosomal L1 domain-containing protein 1 OS=Homo sapiens OX=9606 GN=RSL1D1 PE=1 SV=3	12	6	14	6	54.9	1.013	0.997	1.063	1.019	0.941	0.968	1.001	0.951	1.031	2266.1	2296.6	2259.8	2408.4	2309.8	2132.6	2194.5	2268.7	2154.7	2335.9	-0.46	0.415989	0.944	-0.497	0.380012	0.996
O76031	CLPX	ATP-dependent Clp protease ATP-binding subunit clpX-like, mitochondrial OS=Homo sapiens OX=9606 GN=CLPX PE=1 SV=2	26	15	20	15	69.2	1.013	1.033	0.978	0.968	1.003	0.961	0.99	1.003	1.025	2855.6	2892.2	2949.6	2794.2	2764.1	2864.4	2745.6	2826.1	2862.9	2928.3	-0.125	0.804661	0.966	-0.311	0.541184	0.997
O76041	NEBL	Nebulette OS=Homo sapiens OX=9606 GN=NEBL PE=1 SV=1	2	2	2	2	116.4	1.263	1.656	1.335	1.043	1.188	0.95	1.007	0.823	0.737	252	318.2	417.3	336.4	262.7	299.5	239.5	253.7	207.4	185.8	-3.97	0.000626377	0.0153	-2	0.0335656	0.98
O76071	CIAO1	Probable cytosolic iron-sulfur protein assembly protein CIAO1 OS=Homo sapiens OX=9606 GN=CIAO1 PE=1 SV=1	13	3	4	3	37.8	0.993	1.226	1.092	0.983	1.061	0.988	0.969	1.021	1.021	374.3	371.8	459	408.9	368.1	397	369.8	362.6	382.3	382.1	-0.994	0.135794	0.868	-0.701	0.279611	0.995
O76080	ZFAND5	AN1-type zinc finger protein 5 OS=Homo sapiens OX=9606 GN=ZFAND5 PE=1 SV=1	8	1	1	1	23.1	1.079	0.611	0.791	0.875	0.792	0.89	0.794	0.859	0.812	84.9	91.5	51.8	67.1	74.3	67.2	75.5	67.4	72.9	68.9	-0.636	0.479419	0.95	-0.407	0.648181	0.997
O76094	SRP72	Signal recognition particle subunit SRP72 OS=Homo sapiens OX=9606 GN=SRP72 PE=1 SV=3	12	8	11	8	74.6	0.974	1.01	0.928	1.07	1.043	1.028	0.992	1.045	1.036	1357.6	1322.9	1371.5	1259.4	1452.9	1416.3	1396.2	1346.9	1419.1	1407	0.546	0.30436	0.929	1.09	0.0557104	0.986
O76095	JTB	Protein JTB OS=Homo sapiens OX=9606 GN=JTB PE=1 SV=1	14	2	2	2	16.3	1.032	1.072	1.001	0.953	0.943	1.076	0.981	1	1.021	215.8	222.7	231.4	215.9	205.7	203.5	232.2	211.6	215.8	220.4	-0.5	0.431795	0.946	-0.457	0.471805	0.996
O77932	DXO	Decapping and exoribonuclease protein OS=Homo sapiens OX=9606 GN=DXO PE=2 SV=2	6	2	2	2	44.9	0.822	0.874	0.845	0.835	0.914	0.917	0.926	0.909	1.01	83.7	68.8	73.2	70.7	69.9	76.6	76.8	77.6	76.1	84.6	0.856	0.152384	0.879	0.311	0.586596	0.997
O94760	DDAH1	N(G),N(G)-dimethylarginine dimethylaminohydrolase 1 OS=Homo sapiens OX=9606 GN=DDAH1 PE=1 SV=3	36	8	13	7	31.1	0.943	0.97	1.223	0.847	0.918	0.936	0.696	0.983	1.106	1331.1	1254.6	1291.1	1627.8	1128	1222.1	1245.9	926.8	1308.9	1472.6	-1.03	0.310643	0.93	-1.45	0.164859	0.993
O94761	RECQL4	ATP-dependent DNA helicase Q4 OS=Homo sapiens OX=9606 GN=RECQL4 PE=1 SV=2	6	4	4	4	133	0.784	1.116	0.989	1.021	1.031	0.843	0.965	1.01	1.015	300.3	235.3	335.3	297.1	306.6	309.8	253.3	289.7	303.4	304.7	0.246	0.785744	0.966	0.123	0.891919	0.998
O94762	RECQL5	ATP-dependent DNA helicase Q5 OS=Homo sapiens OX=9606 GN=RECQL5 PE=1 SV=2	1	1	1	1	108.8	0.932	1.132	0.887	1.06	0.925	1.042	0.989	0.926	1.037	640.4	597.1	724.9	567.9	678.9	592.6	667.3	633.5	592.9	663.8	-0.00774	0.992467	0.972	0.535	0.519061	0.997
O94763	URI1	Unconventional prefoldin RPB5 interactor 1 OS=Homo sapiens OX=9606 GN=URI1 PE=1 SV=3	2	1	1	1	59.8	0.981	0.967	1.109	0.983	0.891	0.915	0.954	0.943	0.932	173.1	169.8	167.3	191.8	170.1	154.2	158.4	165.2	163.2	161.2	-0.939	0.13501	0.867	-0.988	0.118055	0.992
O94766	B3GAT3	Galactosylgalactosylxylosylprotein 3-beta-glucuronosyltransferase 3 OS=Homo sapiens OX=9606 GN=B3GAT3 PE=1 SV=2	2	1	1	1	37.1	0.978	1.11	0.999	1.007	0.926	0.96	0.948	0.978	0.862	114.9	112.4	127.6	114.8	115.6	106.3	110.3	108.9	112.3	99	-1.1	0.0941633	0.824	-0.619	0.320663	0.996
O94776	MTA2	Metastasis-associated protein MTA2 OS=Homo sapiens OX=9606 GN=MTA2 PE=1 SV=1	23	15	21	14	75	1.009	1.012	0.914	1.029	1.021	1.027	1.211	0.967	0.989	2397.1	2419.9	2426.8	2190.8	2467.1	2448.3	2462.5	2903	2317.6	2371.2	0.653	0.409649	0.944	0.699	0.378338	0.996
O94782	USP1	Ubiquitin carboxyl-terminal hydrolase 1 OS=Homo sapiens OX=9606 GN=USP1 PE=1 SV=1	1	1	1	1	88.2	1.161	1.044	0.986	1.004	1.013	0.982	1.159	1.025	1.035	221.1	256.8	231	218.1	222.1	224.1	217.2	256.3	226.6	228.9	0.0395	0.955066	0.971	-0.565	0.428129	0.996
O94819	KBTBD11	Kelch repeat and BTB domain-containing protein 11 OS=Homo sapiens OX=9606 GN=KBTBD11 PE=1 SV=1	11	4	4	4	65.7	0.297	0.761	2.189	0.208	0.442	0.204	0.433	1.213	2.245	578.6	172.1	440.2	1266.6	120.5	255.5	118.3	250.3	701.7	1299.3	1.33	0.548966	0.955	-3.33	0.152465	0.993
O94826	TOMM70	Mitochondrial import receptor subunit TOM70 OS=Homo sapiens OX=9606 GN=TOMM70 PE=1 SV=1	24	14	22	14	67.4	1.114	1.261	1.008	0.938	0.969	0.984	0.98	0.955	0.958	2872.1	3199.9	3621.8	2896	2694	2784.2	2827.1	2814	2743.4	2750.5	-1.65	0.0232219	0.518	-1.55	0.0312066	0.979
O94832	MYO1D	Unconventional myosin-Id OS=Homo sapiens OX=9606 GN=MYO1D PE=1 SV=2	10	11	13	11	116.1	0.831	0.94	0.895	1.233	1.193	1.152	1.129	1.08	0.987	1712.7	1423.1	1609.3	1532.6	2112.3	2042.5	1973.1	1934	1850	1689.8	1.91	0.0119036	0.368	3.24	0.000388563	0.236
O94842	TOX4	TOX high mobility group box family member 4 OS=Homo sapiens OX=9606 GN=TOX4 PE=1 SV=1	11	5	6	4	66.2	1.086	0.952	1.023	0.982	0.881	0.962	0.942	0.993	1.063	618.5	671.4	589.1	632.8	607.3	544.8	594.9	582.6	614.3	657.6	-0.439	0.497312	0.951	-0.906	0.176442	0.994
O94855	SEC24D	Protein transport protein Sec24D OS=Homo sapiens OX=9606 GN=SEC24D PE=1 SV=2	6	5	5	5	112.9	0.849	1.233	1.55	0.597	1.131	0.617	0.859	1.621	1.293	217.1	184.4	267.7	336.6	129.6	245.6	134	186.4	352	280.8	0.142	0.934094	0.97	-2.64	0.146186	0.993
O94864	SUPT7L	STAGA complex 65 subunit gamma OS=Homo sapiens OX=9606 GN=SUPT7L PE=1 SV=1	4	2	2	2	46.2	0.956	0.98	1.044	0.967	0.954	0.956	0.98	1.048	1.175	373.5	357.2	365.9	390.1	361.1	356.2	356.9	366.2	391.6	438.9	0.645	0.281626	0.925	-0.362	0.537116	0.997
O94874	UFL1	E3 UFM1-protein ligase 1 OS=Homo sapiens OX=9606 GN=UFL1 PE=1 SV=2	19	14	20	13	89.5	0.893	0.882	1.189	0.953	0.967	0.896	0.924	1.194	1.02	2738.5	2445.2	2414	3256.4	2609.3	2646.9	2454.6	2530.6	3271	2794.2	0.533	0.575569	0.957	-0.467	0.623409	0.997
O94875	SORBS2	Sorbin and SH3 domain-containing protein 2 OS=Homo sapiens OX=9606 GN=SORBS2 PE=1 SV=3	1	1	2	1	124	0.63	0.65	1.05	0.715	0.657	0.776	0.679	0.857	0.915	43.7	27.5	28.4	45.9	31.2	28.7	33.9	29.6	37.4	40	-0.168	0.852867	0.968	-0.883	0.341445	0.996
O94888	UBXN7	UBX domain-containing protein 7 OS=Homo sapiens OX=9606 GN=UBXN7 PE=1 SV=2	14	6	8	6	54.8	1.059	0.924	0.895	0.969	0.978	0.953	0.938	1.002	1.041	690	730.7	637.3	617.6	668.5	675	657.3	647.4	691.3	718.4	0.174	0.787142	0.966	0.0365	0.954751	0.998
O94889	KLHL18	Kelch-like protein 18 OS=Homo sapiens OX=9606 GN=KLHL18 PE=1 SV=3	2	2	2	2	63.6	0.899	1.04	1.211	0.931	0.948	0.855	1.234	1.044	1.319	108.1	97.1	112.4	130.8	100.6	102.5	92.4	133.3	112.8	142.6	1.25	0.167897	0.888	-1.39	0.126865	0.992
O94903	PLPBP	Pyridoxal phosphate homeostasis protein OS=Homo sapiens OX=9606 GN=PLPBP PE=1 SV=1	10	3	3	3	30.3	1.135	0.989	1.09	0.961	1.057	1.014	0.852	0.966	0.973	326.7	370.7	323	356	313.8	345.4	331.2	278.2	315.6	317.8	-1.71	0.0242281	0.53	-0.571	0.397525	0.996
O94905	ERLIN2	Erlin-2 OS=Homo sapiens OX=9606 GN=ERLIN2 PE=1 SV=1	30	10	17	7	37.8	1.09	1.076	1.132	0.972	0.994	0.924	0.672	0.866	0.809	1592.2	1734.8	1713.8	1801.9	1547.1	1582.1	1471.8	1069.2	1379.1	1287.4	-3.14	0.000168644	0.000912	-1.49	0.0206728	0.971
O94906	PRPF6	Pre-mRNA-processing factor 6 OS=Homo sapiens OX=9606 GN=PRPF6 PE=1 SV=1	16	15	22	15	106.9	1.063	1.005	1.001	1.021	1.029	0.966	1.047	1.072	1.025	3903.6	4148.5	3923.3	3909	3986.5	4016.6	3769.3	4085.2	4184.3	4000.4	0.213	0.696718	0.962	-0.113	0.835071	0.998
O94916	NFAT5	Nuclear factor of activated T-cells 5 OS=Homo sapiens OX=9606 GN=NFAT5 PE=1 SV=1	2	3	3	3	165.7	1.128	0.933	0.966	1.15	1.15	1.081	1.243	1.071	1.099	562.4	634.3	524.9	543.3	646.9	646.6	607.7	699	602.3	617.9	1.16	0.139463	0.871	1.42	0.0775634	0.989
O94925	GLS	Glutaminase kidney isoform, mitochondrial OS=Homo sapiens OX=9606 GN=GLS PE=1 SV=1	7	4	4	4	73.4	0.994	1.009	0.777	1.137	1.151	1.137	1.134	0.936	1.043	397.2	395	400.7	308.7	451.6	457.4	451.7	450.5	371.9	414.4	0.972	0.246819	0.917	2.32	0.0147815	0.961
O94927	HAUS5	HAUS augmin-like complex subunit 5 OS=Homo sapiens OX=9606 GN=HAUS5 PE=1 SV=2	4	2	2	2	71.6	0.971	0.954	1.011	1.16	1.103	0.968	1.286	1.168	1.024	66.3	64.5	63.3	67.1	76.9	73.2	64.3	85.3	77.5	67.9	1.64	0.0557347	0.737	1.2	0.144426	0.993
O94941	UBOX5	RING finger protein 37 OS=Homo sapiens OX=9606 GN=UBOX5 PE=1 SV=1	3	1	1	1	58.9	1.048	1.078	1.03	0.983	1.023	1.068	1.062	0.977	1.017	140.4	147.2	151.3	144.7	138	143.6	150	149.2	137.3	142.8	-0.448	0.459678	0.948	-0.188	0.754099	0.997
O94952	FBXO21	F-box only protein 21 OS=Homo sapiens OX=9606 GN=FBXO21 PE=2 SV=2	4	1	1	1	72.2	0.896	1.59	1.173	1.064	0.84	1.172	1.094	1.221	1.409	12.4	11.1	19.7	14.5	13.2	10.4	14.5	13.6	15.1	17.5	0.736	0.543906	0.955	-0.778	0.522031	0.997
O94953	KDM4B	Lysine-specific demethylase 4B OS=Homo sapiens OX=9606 GN=KDM4B PE=1 SV=4	5	5	5	5	121.8	1.233	1.397	0.948	1.197	1.269	1.207	1.205	0.857	0.794	286.2	352.9	399.9	271.3	342.5	363.2	345.4	344.8	245.3	227.2	-1.84	0.136735	0.869	0.823	0.486973	0.997
O94964	SOGA1	Protein SOGA1 OS=Homo sapiens OX=9606 GN=SOGA1 PE=1 SV=2	10	14	15	14	159.7	1.226	0.961	0.773	1.271	1.045	1.248	1.499	0.753	0.822	667.3	817.8	640.9	516.1	848.1	697.1	832.7	1000.4	502.3	548.3	-0.132	0.930594	0.97	1.95	0.216876	0.994
O94966	USP19	Ubiquitin carboxyl-terminal hydrolase 19 OS=Homo sapiens OX=9606 GN=USP19 PE=1 SV=2	9	9	9	9	145.6	1.039	1.01	0.998	1.027	1.048	1.004	1.031	1.005	0.979	546.9	568.2	552.3	546	561.7	572.9	549	563.8	549.6	535.6	-0.196	0.710008	0.963	0.26	0.622971	0.997
O94967	WDR47	WD repeat-containing protein 47 OS=Homo sapiens OX=9606 GN=WDR47 PE=1 SV=1	4	3	3	3	101.9	1.141	1.009	1.029	0.95	0.923	0.981	0.996	1.032	0.963	387.5	442.1	390.9	398.6	368	357.5	380.1	385.8	399.9	373.4	-0.76	0.222823	0.91	-1.22	0.0637994	0.987
O94973	AP2A2	AP-2 complex subunit alpha-2 OS=Homo sapiens OX=9606 GN=AP2A2 PE=1 SV=2	16	14	17	6	103.9	0.625	0.906	1.529	0.7	0.734	0.623	0.621	1.388	1.267	827	516.5	749	1264.9	579.1	606.7	515.1	513.9	1148	1047.9	0.809	0.632521	0.96	-2.41	0.172867	0.993
O94979	SEC31A	Protein transport protein Sec31A OS=Homo sapiens OX=9606 GN=SEC31A PE=1 SV=3	11	13	17	13	132.9	0.986	1.033	0.976	1.044	1.078	1.021	1.049	0.976	1.019	1976.2	1948.9	2042	1928	2062.2	2131.1	2017.8	2072.9	1929.6	2014.6	0.141	0.799553	0.966	0.766	0.186717	0.994
O94992	HEXIM1	Protein HEXIM1 OS=Homo sapiens OX=9606 GN=HEXIM1 PE=1 SV=1	20	5	5	5	40.6	0.894	1.053	1.089	0.891	0.923	0.943	1.033	1.061	1.031	555.1	496.4	584.6	604.4	494.6	512.2	523.4	573.3	589.2	572.3	0.352	0.600074	0.958	-1.04	0.139735	0.993
O95049	TJP3	Tight junction protein ZO-3 OS=Homo sapiens OX=9606 GN=TJP3 PE=1 SV=3	3	2	2	2	101.3	1.035	0.982	0.846	1.184	1.069	1.196	1.003	0.913	1.129	58.3	60.3	57.3	49.3	69.1	62.3	69.7	58.5	53.2	65.8	0.436	0.580843	0.957	2.09	0.0206404	0.971
O95057	DIRAS1	GTP-binding protein Di-Ras1 OS=Homo sapiens OX=9606 GN=DIRAS1 PE=1 SV=1	12	2	2	2	22.3	0.815	0.877	1.032	0.654	0.739	0.752	0.824	1.048	1.137	171.9	140.2	150.7	177.3	112.4	127	129.3	141.6	180.1	195.4	0.827	0.354047	0.937	-1.58	0.0926163	0.99
O95067	CCNB2	G2/mitotic-specific cyclin-B2 OS=Homo sapiens OX=9606 GN=CCNB2 PE=1 SV=1	5	1	1	1	45.3	1.11	0.945	0.899	1.224	0.964	1.105	1.05	0.902	0.992	82.8	91.9	78.2	74.5	101.4	79.8	91.5	87	74.7	82.2	-0.115	0.900931	0.969	1.23	0.204071	0.994
O95071	UBR5	E3 ubiquitin-protein ligase UBR5 OS=Homo sapiens OX=9606 GN=UBR5 PE=1 SV=2	1	2	2	2	309.2	0.673	0.515	0.867	1.182	0.668	1.272	0.789	1.173	0.947	121.3	81.6	62.5	105.2	143.4	81.1	154.4	95.7	142.3	114.9	1.96	0.178608	0.893	2.98	0.0527149	0.986
O95081	AGFG2	Arf-GAP domain and FG repeat-containing protein 2 OS=Homo sapiens OX=9606 GN=AGFG2 PE=1 SV=2	10	3	3	3	48.9	1.072	1.074	0.935	1.217	1.235	1.185	1.29	1.061	0.923	363.3	389.5	390.2	339.8	442.1	448.8	430.5	468.7	385.5	335.5	0.415	0.641765	0.96	1.82	0.0608285	0.987
O95139	NDUFB6	NADH dehydrogenase [ubiquinone] 1 beta subcomplex subunit 6 OS=Homo sapiens OX=9606 GN=NDUFB6 PE=1 SV=3	17	3	4	3	15.5	1.032	0.971	0.942	1.01	0.937	0.929	1.087	1.038	0.995	459.5	474.3	446.3	432.7	464	430.8	426.7	499.7	476.8	457.1	0.604	0.344307	0.936	-0.256	0.683097	0.997
O95140	MFN2	Mitofusin-2 OS=Homo sapiens OX=9606 GN=MFN2 PE=1 SV=3	9	6	7	5	86.3	1.1	1.279	1.066	1.039	1.097	0.981	1.046	0.946	0.905	810.7	891.6	1037.1	864.3	842.7	889.1	795	848.4	766.7	734	-1.75	0.0279479	0.571	-0.771	0.28508	0.995
O95154	AKR7A3	Aflatoxin B1 aldehyde reductase member 3 OS=Homo sapiens OX=9606 GN=AKR7A3 PE=1 SV=2	8	2	2	1	37.2	0.731	1.383	0.629	1.502	1.887	1.201	1.475	0.677	0.41	74.4	54.4	103	46.8	111.8	140.5	89.4	109.8	50.4	30.5	-0.00717	0.996871	0.972	4.03	0.0472487	0.984
O95155	UBE4B	Ubiquitin conjugation factor E4 B OS=Homo sapiens OX=9606 GN=UBE4B PE=1 SV=1	6	5	6	5	146.1	0.883	0.77	0.94	1.028	0.85	0.893	0.949	1.196	1.08	103.5	91.5	79.7	97.4	106.4	88	92.4	98.3	123.8	111.7	1.96	0.0289215	0.58	0.579	0.470548	0.996
O95159	ZFPL1	Zinc finger protein-like 1 OS=Homo sapiens OX=9606 GN=ZFPL1 PE=1 SV=2	12	3	4	3	34.1	0.955	1.044	1.045	1.181	1.08	1.017	1.184	1.275	1.12	267.7	255.8	279.6	279.7	316.3	289.1	272.4	317	341.4	299.9	1.59	0.0290747	0.582	1.02	0.133817	0.992
O95163	ELP1	Elongator complex protein 1 OS=Homo sapiens OX=9606 GN=ELP1 PE=1 SV=3	16	14	15	14	150.2	1.089	1.076	1.003	1.004	1.064	1.038	1.024	0.98	1.002	1607.2	1749.6	1728.6	1612.6	1613.8	1709.7	1667.9	1645.9	1575.4	1610.7	-0.685	0.244243	0.916	-0.0746	0.895522	0.998
O95168	NDUFB4	NADH dehydrogenase [ubiquinone] 1 beta subcomplex subunit 4 OS=Homo sapiens OX=9606 GN=NDUFB4 PE=1 SV=3	32	3	4	3	15.2	1.152	1.117	1.135	1.01	0.77	0.897	0.947	0.88	0.976	597.8	688.4	667.8	678.7	603.8	460.6	536.3	566.4	526.2	583.6	-2.24	0.00724788	0.279	-2.44	0.00433462	0.884
O95169	NDUFB8	NADH dehydrogenase [ubiquinone] 1 beta subcomplex subunit 8, mitochondrial OS=Homo sapiens OX=9606 GN=NDUFB8 PE=1 SV=1	16	2	2	2	21.8	1.022	1.125	1.084	1	0.874	0.892	0.883	0.889	1	262.4	268.1	295.3	284.4	262.4	229.2	234.1	231.7	233.3	262.4	-1.81	0.014727	0.399	-1.68	0.0212716	0.971
O95182	NDUFA7	NADH dehydrogenase [ubiquinone] 1 alpha subcomplex subunit 7 OS=Homo sapiens OX=9606 GN=NDUFA7 PE=1 SV=3	25	2	4	2	12.5	1.095	1.11	1.172	1.037	0.774	0.961	0.873	0.886	1.004	721.9	790.4	801.7	846.2	748.6	559	693.9	630.5	639.3	725	-2.32	0.0104496	0.346	-1.94	0.0249393	0.975
O95196	CSPG5	Chondroitin sulfate proteoglycan 5 OS=Homo sapiens OX=9606 GN=CSPG5 PE=1 SV=3	2	1	1	1	60	1.326	1.2	0.803	0.964	1.101	0.868	1.229	1.141	1.281	62.3	82.6	74.7	50	60	68.6	54.1	76.5	71.1	79.8	1.05	0.371899	0.939	-1.05	0.369253	0.996
O95197	RTN3	Reticulon-3 OS=Homo sapiens OX=9606 GN=RTN3 PE=1 SV=2	2	2	3	2	112.5	0.665	0.604	0.781	0.936	0.599	1.001	0.979	1.361	1.148	249.4	165.8	150.7	194.8	233.4	149.5	249.6	244.2	339.4	286.5	3.7	0.0021555	0.0967	1.29	0.18428	0.994
O95201	ZNF205	Zinc finger protein 205 OS=Homo sapiens OX=9606 GN=ZNF205 PE=1 SV=2	5	2	3	2	60.6	0.994	1.005	1.085	0.889	0.9	0.761	0.716	0.997	1.18	68.9	68.4	69.2	74.7	61.2	62	52.4	49.3	68.7	81.3	-0.769	0.413412	0.944	-1.92	0.0583345	0.987
O95202	LETM1	Mitochondrial proton/calcium exchanger protein OS=Homo sapiens OX=9606 GN=LETM1 PE=1 SV=1	18	12	17	12	83.3	0.913	0.874	0.884	1.05	0.924	1.047	1.019	0.923	1.045	2756.8	2517.4	2410.1	2436.7	2894.9	2547.9	2886.5	2810	2544.2	2882.2	1.08	0.127778	0.861	1.43	0.0512262	0.985
O95208	EPN2	Epsin-2 OS=Homo sapiens OX=9606 GN=EPN2 PE=1 SV=3	1	1	2	1	68.4	0.976	1.377	1.125	1.07	1.144	1.058	1.417	0.841	1.104	375.6	366.6	517.1	422.4	401.9	429.7	397.2	532.3	315.7	414.8	-0.46	0.690167	0.962	0.0191	0.986732	0.998
O95219	SNX4	Sorting nexin-4 OS=Homo sapiens OX=9606 GN=SNX4 PE=1 SV=1	10	3	3	3	51.9	0.855	1.004	1.081	0.999	1	0.941	0.85	0.968	1.092	450.9	385.7	452.8	487.6	450.5	450.9	424.3	383.5	436.7	492.2	-0.27	0.7421	0.964	0.0776	0.924328	0.998
O95229	ZWINT	ZW10 interactor OS=Homo sapiens OX=9606 GN=ZWINT PE=1 SV=2	12	3	3	3	31.3	1.128	0.843	0.82	1.055	1.007	1.039	1.062	0.945	0.923	966.4	1090	814.7	792.2	1019.3	973.4	1004	1026.3	913.6	892.1	0.313	0.734631	0.964	1.17	0.222108	0.994
O95235	KIF20A	Kinesin-like protein KIF20A OS=Homo sapiens OX=9606 GN=KIF20A PE=1 SV=1	6	4	4	4	100.2	1.075	0.869	0.81	1.081	1.013	1.086	1.161	0.886	0.956	459.8	494.3	399.5	372.6	497	465.7	499.1	533.9	407.5	439.6	0.644	0.519078	0.953	1.59	0.129124	0.992
O95238	SPDEF	SAM pointed domain-containing Ets transcription factor OS=Homo sapiens OX=9606 GN=SPDEF PE=1 SV=1	3	1	1	1	37.5	1.427	1.11	0.631	1.24	1.381	1.381	1.257	0.653	0.606	143.8	205.3	159.7	90.8	178.3	198.7	198.6	180.9	93.9	87.2	-1.47	0.374105	0.94	2.23	0.188571	0.994
O95239	KIF4A	Chromosome-associated kinesin KIF4A OS=Homo sapiens OX=9606 GN=KIF4A PE=1 SV=3	16	17	20	17	139.8	1.145	0.762	0.759	1.197	0.977	1.238	1.215	0.983	0.835	3851.3	4408.4	2935.4	2922.7	4610.4	3763.3	4768.4	4679.2	3784.2	3215.3	0.902	0.488171	0.951	2.24	0.103707	0.991
O95248	SBF1	Myotubularin-related protein 5 OS=Homo sapiens OX=9606 GN=SBF1 PE=1 SV=4	6	7	7	7	208.3	0.927	0.983	1.018	1.005	0.961	0.979	1.008	1.088	1.029	600.4	556.5	590.2	611.1	603.3	577.2	587.6	605.1	653	618	0.716	0.204301	0.904	0.175	0.746553	0.997
O95259	KCNH1	Potassium voltage-gated channel subfamily H member 1 OS=Homo sapiens OX=9606 GN=KCNH1 PE=1 SV=1	1	1	1	1	111.4	0.998	0.883	0.965	1.01	0.923	0.962	1.134	0.998	1.007	282.2	281.8	249.3	272.2	285	260.5	271.5	320.2	281.6	284.2	0.979	0.16957	0.889	0.195	0.774422	0.997
O95260	ATE1	Arginyl-tRNA--protein transferase 1 OS=Homo sapiens OX=9606 GN=ATE1 PE=1 SV=2	3	1	2	1	59.1	1.04	1.11	1.117	1.056	0.951	0.981	0.996	0.981	1.007	210.3	218.6	233.5	235	222	200	206.4	209.4	206.2	211.9	-1.11	0.0677819	0.773	-0.889	0.13218	0.992
O95273	CCNDBP1	Cyclin-D1-binding protein 1 OS=Homo sapiens OX=9606 GN=CCNDBP1 PE=1 SV=2	6	2	2	2	40.2	0.948	1.228	1.12	1.22	1.159	1.211	1.048	1.145	1.203	53	50.3	65.1	59.4	64.7	61.5	64.2	55.6	60.7	63.8	0.431	0.542426	0.955	1.23	0.102203	0.991
O95292	VAPB	Vesicle-associated membrane protein-associated protein B/C OS=Homo sapiens OX=9606 GN=VAPB PE=1 SV=3	19	4	6	3	27.2	0.993	1.05	1.024	0.857	0.922	0.98	0.891	0.925	0.984	667.5	663.1	700.7	683.8	572.1	615.4	654.1	594.5	617.3	656.7	-1.15	0.0762396	0.793	-1.15	0.0764409	0.989
O95295	SNAPIN	SNARE-associated protein Snapin OS=Homo sapiens OX=9606 GN=SNAPIN PE=1 SV=1	26	3	5	3	14.9	1.019	1.014	1.173	0.936	0.866	0.883	0.959	1.05	1.029	689.9	702.7	699.5	809	645.9	597.2	609.3	661.7	724.5	710.2	-0.667	0.271336	0.923	-1.92	0.00724263	0.928
O95297	MPZL1	Myelin protein zero-like protein 1 OS=Homo sapiens OX=9606 GN=MPZL1 PE=1 SV=1	9	2	2	2	29.1	0.775	0.961	0.915	1.116	0.932	1.122	0.815	0.968	1.052	112.6	87.2	108.2	103	125.6	104.9	126.3	91.7	109	118.4	0.479	0.587518	0.957	1.96	0.0449778	0.984
O95299	NDUFA10	NADH dehydrogenase [ubiquinone] 1 alpha subcomplex subunit 10, mitochondrial OS=Homo sapiens OX=9606 GN=NDUFA10 PE=1 SV=1	17	6	9	6	40.7	1.114	1.162	1.044	1.06	0.913	0.967	0.941	0.932	0.946	1874.4	2088.4	2178.2	1956.6	1986.6	1711.9	1812.9	1763.7	1747.1	1774	-1.91	0.0105178	0.347	-1.24	0.069489	0.988
O95302	FKBP9	Peptidyl-prolyl cis-trans isomerase FKBP9 OS=Homo sapiens OX=9606 GN=FKBP9 PE=1 SV=2	1	1	1	1	63	1.039	0.916	0.968	0.947	1.026	0.718	0.976	1.09	1.144	101.6	105.5	93	98.4	96.2	104.2	72.9	99.1	110.7	116.2	0.857	0.308867	0.93	-0.684	0.412209	0.996
O95336	PGLS	6-phosphogluconolactonase OS=Homo sapiens OX=9606 GN=PGLS PE=1 SV=2	45	9	18	9	27.5	1.08	1.122	0.992	0.923	1.058	0.888	0.938	1.111	0.964	2620.2	2829.1	2940.1	2598.1	2417.4	2771.8	2327.1	2458	2910.6	2525.1	-0.768	0.339846	0.935	-1.19	0.152196	0.993
O95347	SMC2	Structural maintenance of chromosomes protein 2 OS=Homo sapiens OX=9606 GN=SMC2 PE=1 SV=2	8	9	12	9	135.6	0.766	0.595	0.74	1.155	0.706	1.421	0.858	0.995	0.933	1938.9	1484.9	1153.3	1435.5	2239.9	1369.5	2754.6	1663.6	1929	1808.2	1.51	0.231326	0.913	3.19	0.0224627	0.973
O95352	ATG7	Ubiquitin-like modifier-activating enzyme ATG7 OS=Homo sapiens OX=9606 GN=ATG7 PE=1 SV=1	10	6	6	6	77.9	1.005	1.002	1.046	0.925	0.884	0.88	0.983	1.05	1.022	544.5	547.3	545.9	569.8	503.4	481.5	479.1	535.2	571.6	556.7	-0.0932	0.84978	0.968	-1.44	0.0132259	0.958
O95359	TACC2	Transforming acidic coiled-coil-containing protein 2 OS=Homo sapiens OX=9606 GN=TACC2 PE=1 SV=3	6	11	14	11	309.2	1.1	0.788	0.924	0.946	0.935	0.969	1.091	1.073	1.057	1217.5	1339.2	959	1125.5	1152.3	1138.9	1179.4	1328.7	1306.4	1286.7	1.3	0.118259	0.853	-0.0641	0.934419	0.998
O95363	FARS2	Phenylalanine--tRNA ligase, mitochondrial OS=Homo sapiens OX=9606 GN=FARS2 PE=1 SV=1	7	3	3	3	52.3	1.019	1.077	1.047	1.021	1.063	1.027	1.172	1.027	1.105	221.6	225.8	238.8	232.1	226.2	235.6	227.5	259.8	227.5	244.8	0.435	0.466433	0.949	0.0586	0.920756	0.998
O95365	ZBTB7A	Zinc finger and BTB domain-containing protein 7A OS=Homo sapiens OX=9606 GN=ZBTB7A PE=1 SV=1	10	3	4	3	61.4	1.193	1.138	0.969	1.007	1.105	1.132	1.214	1.027	1.002	286.3	341.5	325.8	277.5	288.4	316.4	324.1	347.5	294	286.7	-0.229	0.790485	0.966	0.0764	0.92936	0.998
O95372	LYPLA2	Acyl-protein thioesterase 2 OS=Homo sapiens OX=9606 GN=LYPLA2 PE=1 SV=1	7	2	3	2	24.7	0.955	1.065	1.043	0.896	0.902	0.92	0.91	0.909	1.078	162.4	155.1	173	169.3	145.6	146.5	149.5	147.7	147.6	175.1	-0.763	0.26064	0.92	-1.32	0.0660454	0.988
O95373	IPO7	Importin-7 OS=Homo sapiens OX=9606 GN=IPO7 PE=1 SV=1	12	10	18	10	119.4	0.989	0.8	0.994	1.029	0.837	1.041	0.996	1.031	0.95	2270.9	2245.4	1816.1	2256.4	2336.1	1900.2	2364.6	2262.6	2340.9	2157.7	0.534	0.506737	0.952	0.5	0.53347	0.997
O95376	ARIH2	E3 ubiquitin-protein ligase ARIH2 OS=Homo sapiens OX=9606 GN=ARIH2 PE=1 SV=1	2	1	1	1	57.8	1.042	1.108	0.966	1.102	0.939	0.964	1.193	0.944	0.929	64.4	67.1	71.4	62.2	71	60.5	62.1	76.8	60.8	59.8	-0.31	0.739931	0.964	-0.305	0.74353	0.997
O95379	TNFAIP8	Tumor necrosis factor alpha-induced protein 8 OS=Homo sapiens OX=9606 GN=TNFAIP8 PE=1 SV=1	4	1	1	1	23	0.803	0.817	0.897	1.041	0.997	0.947	1.012	0.949	0.932	143.2	115	117	128.5	149	142.8	135.6	144.9	135.9	133.5	1.18	0.068732	0.775	1.68	0.0154958	0.963
O95382	MAP3K6	Mitogen-activated protein kinase kinase kinase 6 OS=Homo sapiens OX=9606 GN=MAP3K6 PE=1 SV=3	1	1	1	1	142.5	0.749	1.145	0.908	0.908	0.97	0.852	1.09	1.152	1.071	160.2	119.9	183.4	145.4	145.4	155.4	136.5	174.6	184.5	171.5	1.76	0.0721837	0.784	-0.35	0.698753	0.997
O95394	PGM3	Phosphoacetylglucosamine mutase OS=Homo sapiens OX=9606 GN=PGM3 PE=1 SV=1	18	10	15	10	59.8	0.992	1.003	1.005	1.023	1.142	1.04	1.18	0.983	0.893	2661	2638.6	2668	2675	2722.3	3037.6	2768.1	3140.8	2615.1	2376.7	0.125	0.877383	0.969	0.905	0.276791	0.995
O95396	MOCS3	Adenylyltransferase and sulfurtransferase MOCS3 OS=Homo sapiens OX=9606 GN=MOCS3 PE=1 SV=1	6	2	2	2	49.6	0.987	1.106	1.036	1.163	1.143	1.114	1.079	0.926	0.998	106.5	105.1	117.8	110.3	123.9	121.8	118.7	114.9	98.6	106.2	-0.479	0.476354	0.95	1.21	0.0902697	0.99
O95400	CD2BP2	CD2 antigen cytoplasmic tail-binding protein 2 OS=Homo sapiens OX=9606 GN=CD2BP2 PE=1 SV=1	18	4	4	4	37.6	0.951	1.091	1.024	0.917	1.043	0.947	0.948	1.028	1.043	571.4	543.3	623.4	584.8	524.1	596	540.8	541.9	587.6	596.1	-0.245	0.714814	0.963	-0.52	0.443102	0.996
O95425	SVIL	Supervillin OS=Homo sapiens OX=9606 GN=SVIL PE=1 SV=2	0	1	1	1	247.6	0.974	0.677	0.817	1.024	0.774	1.007	0.971	1.009	0.843	217.8	212	147.5	177.9	223.1	168.6	219.3	211.5	219.7	183.6	0.871	0.330973	0.934	1.02	0.257255	0.995
O95429	BAG4	BAG family molecular chaperone regulator 4 OS=Homo sapiens OX=9606 GN=BAG4 PE=1 SV=1	10	3	3	3	49.6	0.909	0.978	0.899	0.901	0.947	0.817	0.83	0.991	0.925	128.3	116.6	125.5	115.4	115.6	121.5	104.8	106.5	127.1	118.7	-0.192	0.762343	0.965	-0.427	0.505121	0.997
O95433	AHSA1	Activator of 90 kDa heat shock protein ATPase homolog 1 OS=Homo sapiens OX=9606 GN=AHSA1 PE=1 SV=1	38	11	21	11	38.3	1.054	1.039	0.971	0.956	1.048	1	1.065	0.973	1.012	2300.9	2424.8	2389.8	2234.3	2199.2	2412.3	2300.5	2450.3	2238.6	2329	-0.133	0.836007	0.967	-0.163	0.800302	0.997
O95445	APOM	Apolipoprotein M OS=Homo sapiens OX=9606 GN=APOM PE=1 SV=2	4	1	1	1	21.2	1.214	2.036	1.209	0.838	1.037	0.853	0.698	0.969	0.922	55.2	67	112.3	66.7	46.3	57.2	47.1	38.5	53.5	50.9	-4.01	0.00104469	0.0369	-3.59	0.00224363	0.784
O95453	PARN	Poly(A)-specific ribonuclease PARN OS=Homo sapiens OX=9606 GN=PARN PE=1 SV=1	8	5	5	5	73.4	0.914	1.106	1.032	0.984	1.059	0.956	0.963	0.966	0.99	872.5	797.3	965.4	900.1	858.5	923.8	834.2	840.7	842.5	864.2	-0.541	0.425618	0.945	-0.0358	0.957261	0.998
O95456	PSMG1	Proteasome assembly chaperone 1 OS=Homo sapiens OX=9606 GN=PSMG1 PE=1 SV=1	16	4	4	4	32.8	0.962	1.037	0.94	0.976	1.025	0.855	0.889	0.998	1.008	253.4	243.8	262.9	238.1	247.2	259.7	216.7	225.2	252.8	255.5	-0.278	0.688488	0.962	-0.222	0.74869	0.997
O95470	SGPL1	Sphingosine-1-phosphate lyase 1 OS=Homo sapiens OX=9606 GN=SGPL1 PE=1 SV=3	6	4	4	4	63.5	1.048	0.966	0.849	1.203	1.092	1.263	1.026	0.844	0.877	1016.3	1065.1	982	862.7	1222.9	1110.1	1283.7	1042.9	858.1	891.7	-0.445	0.585611	0.957	2.33	0.0144843	0.961
O95478	NSA2	Ribosome biogenesis protein NSA2 homolog OS=Homo sapiens OX=9606 GN=NSA2 PE=1 SV=1	3	1	1	1	30	1.351	1.251	0.965	1.247	1.217	1.175	1.224	1.509	1.379	76.5	103.3	95.7	73.8	95.4	93.1	89.9	93.6	115.4	105.5	1.15	0.175071	0.892	0.717	0.382081	0.996
O95479	H6PD	GDH/6PGL endoplasmic bifunctional protein OS=Homo sapiens OX=9606 GN=H6PD PE=1 SV=2	1	1	2	1	88.8	2.986	1.305	2.858	2.944	1.129	1.136	1.649	1.133	1.561	305.9	913.4	399.3	874.2	900.5	345.4	347.5	504.4	346.5	477.6	-1.47	0.231959	0.913	-1.29	0.289862	0.995
O95486	SEC24A	Protein transport protein Sec24A OS=Homo sapiens OX=9606 GN=SEC24A PE=1 SV=2	9	8	12	8	119.7	0.923	1.016	1.029	0.977	0.963	0.955	0.976	0.944	1.01	1334.9	1232.1	1356.9	1373.4	1304.7	1285.1	1274.4	1303.1	1260	1348.3	-0.225	0.686671	0.962	-0.217	0.697557	0.997
O95487	SEC24B	Protein transport protein Sec24B OS=Homo sapiens OX=9606 GN=SEC24B PE=1 SV=2	11	10	11	10	137.3	1.062	0.993	0.979	1.01	1.024	1.079	1.03	1.052	1.055	1238.9	1315.5	1230.6	1213.5	1251.3	1269	1336.3	1276.5	1303.8	1307.6	0.303	0.587699	0.957	0.43	0.444616	0.996
O95551	TDP2	Tyrosyl-DNA phosphodiesterase 2 OS=Homo sapiens OX=9606 GN=TDP2 PE=1 SV=1	24	6	6	6	40.9	1.053	0.957	0.828	1.015	0.987	1.006	1.003	0.99	0.951	969.4	1021.2	928.2	802.8	984.4	956.6	974.8	972	959.4	921.6	0.207	0.761833	0.965	0.64	0.358931	0.996
O95563	MPC2	Mitochondrial pyruvate carrier 2 OS=Homo sapiens OX=9606 GN=MPC2 PE=1 SV=1	6	1	1	1	14.3	1.137	1.243	0.963	1.193	1.264	1.469	1.473	0.942	0.909	209.8	238.6	260.8	202.1	250.2	265.1	308.1	309.1	197.5	190.6	-0.585	0.614092	0.959	1.52	0.204715	0.994
O95571	ETHE1	Persulfide dioxygenase ETHE1, mitochondrial OS=Homo sapiens OX=9606 GN=ETHE1 PE=1 SV=2	14	3	4	3	27.9	1.019	1.339	1.049	0.949	0.881	0.91	0.824	0.889	1.143	417.8	425.9	559.6	438.2	396.5	368	380.3	344.3	371.4	477.7	-1.78	0.065949	0.768	-2.09	0.03635	0.981
O95573	ACSL3	Long-chain-fatty-acid--CoA ligase 3 OS=Homo sapiens OX=9606 GN=ACSL3 PE=1 SV=3	17	10	10	9	80.4	0.966	0.937	0.996	1.276	1.102	1.185	1.113	0.878	0.639	1299.2	1255.1	1217.2	1293.7	1657.8	1431.6	1540.2	1445.6	1140.9	830.5	-0.473	0.617803	0.959	2.33	0.0294026	0.978
O95602	POLR1A	DNA-directed RNA polymerase I subunit RPA1 OS=Homo sapiens OX=9606 GN=POLR1A PE=1 SV=2	15	20	21	20	194.7	1.032	0.94	1.078	0.968	0.957	0.957	1.035	1.058	1.12	2604.8	2689.2	2447.5	2806.9	2521.7	2493.8	2492.7	2695.2	2756.7	2916.8	0.484	0.389797	0.942	-0.66	0.24797	0.995
O95613	PCNT	Pericentrin OS=Homo sapiens OX=9606 GN=PCNT PE=1 SV=4	1	1	1	1	377.8	0.829	0.901	1.011	0.766	0.928	1.072	1.032	1	1.208	35.9	29.8	32.4	36.3	27.5	33.3	38.5	37	35.9	43.4	1.59	0.110592	0.845	0.225	0.809955	0.997
O95625	ZBTB11	Zinc finger and BTB domain-containing protein 11 OS=Homo sapiens OX=9606 GN=ZBTB11 PE=1 SV=2	7	6	6	6	119.3	1.016	0.893	0.929	1.073	0.814	0.991	1.105	0.991	0.916	622.6	632.4	556.2	578.3	668	507	616.9	687.8	616.8	570.3	0.589	0.517728	0.953	0.296	0.742899	0.997
O95630	STAMBP	STAM-binding protein OS=Homo sapiens OX=9606 GN=STAMBP PE=1 SV=1	17	6	7	6	48	0.939	1.127	1.102	0.975	1.019	0.942	0.941	0.986	0.951	648.5	608.7	731	714.6	632.5	660.7	610.8	610.4	639.6	616.7	-1.09	0.117963	0.852	-0.702	0.296321	0.995
O95639	CPSF4	Cleavage and polyadenylation specificity factor subunit 4 OS=Homo sapiens OX=9606 GN=CPSF4 PE=1 SV=1	26	5	5	5	30.2	1.024	1.046	1.029	1.103	1.133	1.021	1.058	0.998	0.998	884.6	906.2	925.2	909.8	975.8	1002.2	903.1	936	882.4	883.2	-0.234	0.680794	0.962	0.727	0.21732	0.994
O95671	ASMTL	Probable bifunctional dTTP/UTP pyrophosphatase/methyltransferase protein OS=Homo sapiens OX=9606 GN=ASMTL PE=1 SV=3	21	10	11	10	68.8	1.09	1.171	1.098	0.877	0.835	0.973	0.892	0.944	1.027	817.9	891.1	957.6	898.3	717.6	683.3	796	729.5	772.1	840.1	-1.92	0.0108161	0.352	-2.39	0.00300112	0.836
O95696	BRD1	Bromodomain-containing protein 1 OS=Homo sapiens OX=9606 GN=BRD1 PE=1 SV=1	2	2	2	2	119.4	1.058	0.814	0.839	1.069	0.966	0.979	1.075	0.85	0.833	163.1	172.5	132.7	136.8	174.3	157.6	159.6	175.4	138.6	135.9	0.0969	0.919784	0.97	1.03	0.299797	0.995
O95707	POP4	Ribonuclease P protein subunit p29 OS=Homo sapiens OX=9606 GN=POP4 PE=1 SV=2	10	2	3	2	25.4	0.903	1.113	1.044	1.094	1.086	0.978	1.075	1.161	1.242	245.4	221.5	273	256.2	268.5	266.5	240	263.7	284.8	304.7	1.33	0.0855035	0.81	0.619	0.394878	0.996
O95714	HERC2	E3 ubiquitin-protein ligase HERC2 OS=Homo sapiens OX=9606 GN=HERC2 PE=1 SV=2	1	4	5	4	526.9	0.941	0.76	1.088	0.918	0.879	0.959	0.966	1.123	1.209	414.6	390.2	315.2	451	380.5	364.5	397.4	400.7	465.7	501.3	1.43	0.109823	0.844	-0.33	0.694514	0.997
O95721	SNAP29	Synaptosomal-associated protein 29 OS=Homo sapiens OX=9606 GN=SNAP29 PE=1 SV=1	31	6	7	6	29	0.975	1.183	1.103	0.937	1.039	0.921	0.934	1.078	1.019	830.2	809.8	982.2	916	777.8	862.2	764.8	775.5	894.7	846.1	-0.806	0.285284	0.926	-1.18	0.130227	0.992
O95747	OXSR1	Serine/threonine-protein kinase OSR1 OS=Homo sapiens OX=9606 GN=OXSR1 PE=1 SV=1	15	7	12	6	58	1.011	0.933	0.997	1.025	1.02	0.948	0.921	0.867	0.876	1310	1324.1	1222.4	1306.3	1342.8	1336.4	1241.3	1206.6	1135.5	1147.5	-1.09	0.0678516	0.773	0.279	0.613346	0.997
O95749	GGPS1	Geranylgeranyl pyrophosphate synthase OS=Homo sapiens OX=9606 GN=GGPS1 PE=1 SV=1	10	3	3	3	34.8	1.323	1.274	1.037	1.357	1.401	1.183	1.28	1.168	1.052	84	111.1	107.1	87.1	114	117.7	99.4	107.5	98.2	88.4	-0.226	0.773138	0.965	0.881	0.275327	0.995
O95757	HSPA4L	Heat shock 70 kDa protein 4L OS=Homo sapiens OX=9606 GN=HSPA4L PE=1 SV=3	37	26	41	23	94.5	0.997	1.037	1.109	0.999	1.093	0.892	1.002	1.002	0.965	4672.6	4658.4	4847.3	5183.6	4666	5107.6	4166.5	4681.7	4680.7	4510.2	-0.697	0.325043	0.933	-0.516	0.461888	0.996
O95758	PTBP3	Polypyrimidine tract-binding protein 3 OS=Homo sapiens OX=9606 GN=PTBP3 PE=1 SV=2	29	11	24	9	59.7	1.453	0.829	0.387	1.653	1.321	1.667	1.294	0.442	0.417	1269.2	1844	1052.7	491.4	2097.5	1676.4	2116.1	1642	560.7	529.9	-0.7	0.707386	0.963	3.98	0.0527025	0.986
O95777	LSM8	U6 snRNA-associated Sm-like protein LSm8 OS=Homo sapiens OX=9606 GN=LSM8 PE=1 SV=3	69	5	7	5	10.4	1.022	0.981	0.964	1.021	1.178	0.949	0.977	0.927	0.932	1192.4	1218.9	1169.7	1148.9	1217.3	1404.8	1131	1165.2	1104.8	1111.5	-0.594	0.395724	0.942	0.672	0.339213	0.996
O95782	AP2A1	AP-2 complex subunit alpha-1 OS=Homo sapiens OX=9606 GN=AP2A1 PE=1 SV=3	24	23	33	15	107.5	0.866	0.921	0.957	0.96	0.969	0.98	0.9	1.02	0.973	3812.2	3301.9	3510.6	3646.6	3660.3	3695.7	3734.8	3431.4	3889.6	3709.5	0.445	0.437346	0.946	0.664	0.254511	0.995
O95785	WIZ	Protein Wiz OS=Homo sapiens OX=9606 GN=WIZ PE=1 SV=2	5	6	7	6	178.6	1.129	0.953	0.938	1.115	0.981	1.013	1.161	1.055	1.023	1135.2	1281.3	1081.7	1064.4	1265.4	1113.5	1150.1	1318.4	1197.7	1160.9	0.72	0.380638	0.94	0.482	0.552456	0.997
O95793	STAU1	Double-stranded RNA-binding protein Staufen homolog 1 OS=Homo sapiens OX=9606 GN=STAU1 PE=1 SV=2	20	9	15	8	63.1	1.055	1.087	1.032	0.993	0.919	0.977	1.041	1.066	1.079	2168.1	2288.2	2357.6	2238.4	2153.3	1992.6	2118.1	2256.9	2310.9	2339.3	-0.0221	0.965864	0.971	-1.04	0.0656443	0.988
O95801	TTC4	Tetratricopeptide repeat protein 4 OS=Homo sapiens OX=9606 GN=TTC4 PE=1 SV=3	9	3	3	3	44.7	1.093	1.003	0.981	1.039	0.988	1.02	1.013	0.97	0.969	860.7	940.9	863.5	844.1	894.1	850.2	877.9	871.5	835.2	834.3	-0.565	0.351984	0.937	0.023	0.969054	0.998
O95816	BAG2	BAG family molecular chaperone regulator 2 OS=Homo sapiens OX=9606 GN=BAG2 PE=1 SV=1	9	2	2	2	23.8	1.113	1.17	0.953	0.994	0.963	1.03	0.989	0.974	0.761	169.5	188.5	198.3	161.4	168.4	163.2	174.6	167.6	165.1	128.9	-1.62	0.058499	0.746	-0.71	0.372921	0.996
O95817	BAG3	BAG family molecular chaperone regulator 3 OS=Homo sapiens OX=9606 GN=BAG3 PE=1 SV=3	28	11	13	11	61.6	0.934	1.17	1.156	0.952	1.123	1.017	1.01	1.074	0.848	1539.5	1438.6	1801.7	1779.4	1465.6	1729.4	1566.2	1555.6	1652.8	1305.4	-0.915	0.324711	0.933	-0.323	0.722113	0.997
O95825	CRYZL1	Quinone oxidoreductase-like protein 1 OS=Homo sapiens OX=9606 GN=CRYZL1 PE=1 SV=2	3	1	1	1	38.7	0.954	0.984	1.035	0.907	0.905	0.827	0.902	1.045	1.016	193.3	184.4	190.2	200.1	175.2	174.9	159.9	174.3	202	196.3	-0.149	0.803738	0.966	-1.25	0.0572357	0.986
O95831	AIFM1	Apoptosis-inducing factor 1, mitochondrial OS=Homo sapiens OX=9606 GN=AIFM1 PE=1 SV=1	40	19	40	19	66.9	0.988	1.121	1.09	0.927	0.976	0.926	0.968	0.976	1.052	7105.8	7021.5	7968.5	7746.1	6589.7	6938.5	6579.5	6880.7	6933	7476.7	-0.825	0.173907	0.891	-1.35	0.0376258	0.982
O95833	CLIC3	Chloride intracellular channel protein 3 OS=Homo sapiens OX=9606 GN=CLIC3 PE=1 SV=2	11	2	2	2	26.6	0.344	0.711	1.973	0.463	0.678	0.482	0.502	1.372	1.072	235.1	80.8	167.2	463.7	108.8	159.5	113.2	118	322.6	252.1	0.615	0.753837	0.965	-2.52	0.216449	0.994
O95834	EML2	Echinoderm microtubule-associated protein-like 2 OS=Homo sapiens OX=9606 GN=EML2 PE=1 SV=1	8	4	6	4	70.6	0.809	1.315	1.169	0.936	1.014	0.856	0.957	1.002	1.11	883.2	714.1	1161.7	1032.2	826.8	895.8	756	845.4	884.8	980	-0.541	0.614758	0.959	-1.34	0.22574	0.994
O95835	LATS1	Serine/threonine-protein kinase LATS1 OS=Homo sapiens OX=9606 GN=LATS1 PE=1 SV=1	1	1	1	1	126.8	0.903	0.789	0.876	0.844	1.028	0.806	0.901	0.999	1.076	39.3	35.5	31	34.4	33.1	40.4	31.6	35.4	39.2	42.2	1.2	0.143462	0.873	0.355	0.64931	0.997
O95861	BPNT1	3'(2'),5'-bisphosphate nucleotidase 1 OS=Homo sapiens OX=9606 GN=BPNT1 PE=1 SV=1	41	11	21	11	33.4	0.935	1.034	1.108	0.933	1.016	0.969	0.902	1.077	1.067	2621.3	2451.1	2709.8	2904.5	2447	2663.2	2541	2363.5	2822.9	2795.8	-0.204	0.783689	0.966	-0.505	0.501405	0.997
O95865	DDAH2	N(G),N(G)-dimethylarginine dimethylaminohydrolase 2 OS=Homo sapiens OX=9606 GN=DDAH2 PE=1 SV=1	30	6	13	5	29.6	0.714	0.911	1.211	0.887	1.064	0.918	1.143	0.958	1.301	1467.3	1048	1336.6	1776.2	1301.4	1561.3	1347.6	1676.4	1405.4	1908.5	1.57	0.206082	0.905	0.05	0.966523	0.998
O95870	ABHD16A	Phosphatidylserine lipase ABHD16A OS=Homo sapiens OX=9606 GN=ABHD16A PE=1 SV=3	7	4	4	4	63.2	1.113	0.982	1.478	0.964	0.937	1.048	0.882	1.127	1.151	336.6	374.7	330.5	497.4	324.4	315.5	352.9	296.9	379.4	387.4	-1.02	0.309677	0.93	-1.51	0.14642	0.993
O95872	GPANK1	G patch domain and ankyrin repeat-containing protein 1 OS=Homo sapiens OX=9606 GN=GPANK1 PE=1 SV=1	4	1	1	1	39.3	1.14	0.921	1.098	1.044	1.037	1.029	1.199	1.035	1.097	95.9	109.3	88.3	105.4	100.1	99.4	98.7	115	99.2	105.2	0.45	0.551673	0.955	0.0197	0.979051	0.998
O95881	TXNDC12	Thioredoxin domain-containing protein 12 OS=Homo sapiens OX=9606 GN=TXNDC12 PE=1 SV=1	35	5	9	5	19.2	1.113	0.939	0.934	1.139	1.054	1.112	1.015	0.88	0.878	1706.4	1898.9	1601.7	1594.1	1944	1798.5	1897	1731.3	1501.5	1499.1	-0.785	0.321266	0.932	1.34	0.105605	0.991
O95900	TRUB2	Mitochondrial mRNA pseudouridine synthase TRUB2 OS=Homo sapiens OX=9606 GN=TRUB2 PE=1 SV=1	12	4	5	4	36.7	1.029	0.958	1.011	0.904	0.912	0.906	0.915	0.976	1.053	323.1	332.3	309.6	326.5	292.2	294.7	292.6	295.5	315.2	340.3	-0.409	0.47251	0.949	-1.14	0.0642527	0.987
O95969	SCGB1D2	Secretoglobin family 1D member 2 OS=Homo sapiens OX=9606 GN=SCGB1D2 PE=2 SV=1	10	1	1	1	9.9	0.292	0.298	0.21	0.197	0.267	0.283	0.709	0.376	5.578	87.9	25.6	26.2	18.5	17.3	23.4	24.8	62.3	33.1	490.1	3.66	0.0916328	0.82	-0.23	0.908845	0.998
O95983	MBD3	Methyl-CpG-binding domain protein 3 OS=Homo sapiens OX=9606 GN=MBD3 PE=1 SV=1	28	6	7	5	32.8	1.123	0.823	1.007	0.988	0.926	0.926	0.888	1.002	1.021	615.4	691	506.3	619.8	608.3	570	570	546.4	616.3	628.1	-0.433	0.593234	0.958	-0.551	0.498191	0.997
O95985	TOP3B	DNA topoisomerase 3-beta-1 OS=Homo sapiens OX=9606 GN=TOP3B PE=1 SV=1	3	2	2	2	96.6	0.97	1.142	1.201	1.116	1.009	0.927	0.908	1.157	1.16	107.8	104.6	123.1	129.5	120.3	108.8	99.9	97.8	124.7	125.1	-0.377	0.686415	0.962	-0.633	0.50045	0.997
O95989	NUDT3	Diphosphoinositol polyphosphate phosphohydrolase 1 OS=Homo sapiens OX=9606 GN=NUDT3 PE=1 SV=1	13	2	3	2	19.5	0.948	1.007	1.15	0.715	0.779	0.679	0.786	1.128	1.155	374.7	355.1	377.3	430.8	268.1	291.7	254.5	294.5	422.8	432.6	-0.191	0.842426	0.968	-2.79	0.0137749	0.959
O95994	AGR2	Anterior gradient protein 2 homolog OS=Homo sapiens OX=9606 GN=AGR2 PE=1 SV=1	26	4	8	4	20	1.263	0.839	1.273	1.865	1.101	1.15	0.923	0.403	0.319	1181.4	1491.6	991	1503.5	2202.7	1300.1	1358.1	1090.6	475.9	377.2	-3.63	0.0121922	0.371	1.37	0.275532	0.995
O95997	PTTG1	Securin OS=Homo sapiens OX=9606 GN=PTTG1 PE=1 SV=1	13	2	2	2	22	1.086	1.123	0.972	1.162	1.022	1.032	1.143	1.1	1.226	246.2	267.4	276.4	239.4	286.2	251.7	254.1	281.4	270.8	301.8	0.823	0.232422	0.913	0.313	0.639659	0.997
O95999	BCL10	B-cell lymphoma/leukemia 10 OS=Homo sapiens OX=9606 GN=BCL10 PE=1 SV=1	4	1	1	1	26.2	1.088	1.265	0.907	1.086	1.083	1.076	1.471	0.974	1.471	279.9	304.7	354.1	253.8	303.9	303.2	301.3	411.8	272.5	411.7	1.1	0.316851	0.931	0.429	0.690403	0.997
O96000	NDUFB10	NADH dehydrogenase [ubiquinone] 1 beta subcomplex subunit 10 OS=Homo sapiens OX=9606 GN=NDUFB10 PE=1 SV=3	41	6	12	6	20.8	1.034	1.047	1.038	1.04	0.898	0.945	0.987	1.044	0.902	1273.1	1316.2	1333.5	1321.7	1324.3	1143.4	1203.7	1257	1328.5	1148	-0.747	0.263014	0.921	-0.85	0.206861	0.994
O96005	CLPTM1	Cleft lip and palate transmembrane protein 1 OS=Homo sapiens OX=9606 GN=CLPTM1 PE=1 SV=1	5	3	4	3	76	0.852	0.818	0.74	1.003	0.881	1.124	0.995	1.147	1.18	277.9	236.7	227.4	205.7	278.8	244.8	312.4	276.4	318.7	328.1	2.82	0.0040607	0.174	1.97	0.0271272	0.976
O96006	ZBED1	Zinc finger BED domain-containing protein 1 OS=Homo sapiens OX=9606 GN=ZBED1 PE=1 SV=1	2	1	2	1	78.1	0.864	0.9	1.105	0.771	0.655	0.766	0.787	1.127	1.116	96	83	86.4	106.1	74.1	62.9	73.5	75.5	108.2	107.2	0.508	0.610798	0.958	-1.94	0.0724434	0.988
O96008	TOMM40	Mitochondrial import receptor subunit TOM40 homolog OS=Homo sapiens OX=9606 GN=TOMM40 PE=1 SV=1	39	8	17	8	37.9	1.059	1.098	0.963	0.99	1.051	0.993	0.991	1.012	1.025	2297.4	2432.5	2523	2213.1	2274.6	2414	2282.3	2277.2	2326.1	2355	-0.425	0.47257	0.95	-0.193	0.741859	0.997
O96011	PEX11B	Peroxisomal membrane protein 11B OS=Homo sapiens OX=9606 GN=PEX11B PE=1 SV=1	12	1	1	1	28.4	0.871	0.98	1.212	0.949	1.022	0.962	0.978	1.117	1.089	145.9	127.1	142.9	176.8	138.4	149	140.3	142.6	163	158.8	0.504	0.5554	0.955	-0.267	0.753126	0.997
O96013	PAK4	Serine/threonine-protein kinase PAK 4 OS=Homo sapiens OX=9606 GN=PAK4 PE=1 SV=1	14	8	11	8	64	1.022	1.226	1.006	0.947	0.994	0.963	1.016	0.979	0.954	646.5	660.8	792.9	650.3	612	643	622.9	656.8	633	616.5	-0.994	0.14484	0.874	-1.09	0.113794	0.991
O96017	CHEK2	Serine/threonine-protein kinase Chk2 OS=Homo sapiens OX=9606 GN=CHEK2 PE=1 SV=1	13	5	5	5	60.9	1.139	0.956	0.893	0.985	1.08	0.956	1.002	0.977	0.97	879.5	1002	840.8	785.6	866.3	949.8	840.5	880.9	859.6	852.7	-0.236	0.764279	0.965	0.186	0.813634	0.997
O96019	ACTL6A	Actin-like protein 6A OS=Homo sapiens OX=9606 GN=ACTL6A PE=1 SV=1	20	7	9	7	47.4	1.038	0.993	0.984	1.064	1.1	1.117	1.177	0.94	0.939	869.8	902.9	863.3	855.6	925.6	956.8	971.4	1023.7	817.2	816.4	-0.00127	0.99871	0.972	1.14	0.16645	0.993
O96028	NSD2	Histone-lysine N-methyltransferase NSD2 OS=Homo sapiens OX=9606 GN=NSD2 PE=1 SV=1	9	9	11	9	152.2	1.777	0.892	1.067	1.053	0.909	1.046	1.447	1.048	1.227	438.5	779.3	391.1	467.9	461.7	398.6	458.7	634.6	459.7	538	0.606	0.622766	0.959	-0.972	0.434325	0.996
O96033	MOCS2	Molybdopterin synthase sulfur carrier subunit OS=Homo sapiens OX=9606 GN=MOCS2 PE=1 SV=1	13	1	1	1	9.7	0.837	0.907	1.015	0.862	0.906	0.726	0.878	0.979	1.058	180.9	151.4	164.2	183.6	156	163.9	131.4	158.9	177.1	191.5	0.387	0.596854	0.958	-0.867	0.248713	0.995
P00167	CYB5A	Cytochrome b5 OS=Homo sapiens OX=9606 GN=CYB5A PE=1 SV=2	49	5	7	5	15.3	0.963	0.867	1.2	0.85	0.97	0.844	0.86	1.061	1.217	1382.2	1330.7	1198.5	1659.2	1174.5	1340.1	1166.5	1188	1466.7	1681.6	0.198	0.846448	0.968	-1.26	0.233566	0.995
P00338	LDHA	L-lactate dehydrogenase A chain OS=Homo sapiens OX=9606 GN=LDHA PE=1 SV=2	31	11	46	9	36.7	1.052	0.785	0.948	0.986	1.01	1.058	0.953	0.878	0.766	6463.7	6802.7	5076.9	6126.4	6371.5	6529.6	6839.3	6161.7	5675.2	4953.7	-0.747	0.336397	0.935	0.941	0.23173	0.995
P00367	GLUD1	Glutamate dehydrogenase 1, mitochondrial OS=Homo sapiens OX=9606 GN=GLUD1 PE=1 SV=2	37	18	38	18	61.4	1.115	1.487	0.797	1.391	1.288	1.314	1.195	0.646	0.65	6238.5	6958.1	9273.7	4971.7	8676.9	8032.2	8196.3	7454.2	4032.4	4053.5	-1.85	0.219062	0.909	1.93	0.202127	0.994
P00374	DHFR	Dihydrofolate reductase OS=Homo sapiens OX=9606 GN=DHFR PE=1 SV=2	40	7	11	7	21.4	1.174	1.016	0.822	1.18	1.057	1.194	1.108	0.879	0.808	1672.5	1963	1698.5	1375.4	1973.4	1768.2	1996.1	1853.3	1470.1	1350.6	-0.708	0.518489	0.953	1.53	0.179013	0.994
P00387	CYB5R3	NADH-cytochrome b5 reductase 3 OS=Homo sapiens OX=9606 GN=CYB5R3 PE=1 SV=3	14	3	3	3	34.2	0.933	0.887	1.041	0.932	0.866	0.877	0.964	1.13	1.126	347.3	324	307.9	361.6	323.8	300.6	304.7	334.9	392.3	390.9	1.15	0.102815	0.836	-0.739	0.276377	0.995
P00390	GSR	Glutathione reductase, mitochondrial OS=Homo sapiens OX=9606 GN=GSR PE=1 SV=2	34	13	28	13	56.2	1.026	1.304	0.905	0.963	1.089	0.954	0.92	1.007	1.079	6391	6559.6	8336.2	5785.1	6152.2	6961.5	6096.8	5882.2	6437.6	6895.5	-0.663	0.47032	0.949	-0.447	0.623526	0.997
P00403	MT-CO2	Cytochrome c oxidase subunit 2 OS=Homo sapiens OX=9606 GN=MT-CO2 PE=1 SV=1	4	1	1	1	25.5	0.936	0.842	0.657	0.872	0.987	1.044	0.67	1.04	1.093	141.6	132.5	119.3	93.1	123.5	139.7	147.9	94.9	147.2	154.8	1.07	0.309156	0.93	1.35	0.206066	0.994
P00441	SOD1	Superoxide dismutase [Cu-Zn] OS=Homo sapiens OX=9606 GN=SOD1 PE=1 SV=2	30	5	11	5	15.9	1.091	0.889	0.963	0.987	1.107	1.008	0.956	0.856	0.906	2124	2316.8	1888.3	2044.5	2095.5	2352.3	2140.3	2029.9	1818.6	1925.2	-0.933	0.219911	0.909	0.647	0.385773	0.996
P00491	PNP	Purine nucleoside phosphorylase OS=Homo sapiens OX=9606 GN=PNP PE=1 SV=2	29	7	13	7	32.1	1.081	1.084	0.935	1.139	1.11	1.073	1.069	0.928	0.931	1171.4	1265.9	1269.7	1095.3	1334.8	1300.5	1257.2	1252.1	1087.5	1091.1	-0.67	0.380158	0.94	0.993	0.203325	0.994
P00492	HPRT1	Hypoxanthine-guanine phosphoribosyltransferase OS=Homo sapiens OX=9606 GN=HPRT1 PE=1 SV=2	35	7	14	7	24.6	0.993	1.132	1.036	0.967	0.993	0.994	1.002	0.962	0.957	3112.3	3089	3522.7	3222.9	3009.1	3090.5	3093.3	3118	2994.7	2979	-0.905	0.134083	0.867	-0.64	0.276114	0.995
P00505	GOT2	Aspartate aminotransferase, mitochondrial OS=Homo sapiens OX=9606 GN=GOT2 PE=1 SV=3	34	14	31	14	47.5	0.949	1.095	1.044	0.896	0.929	0.872	0.904	1.038	1.088	4731.7	4489.1	5181.7	4939.1	4239.7	4396.6	4128	4275.9	4911.4	5147.8	-0.32	0.638528	0.96	-1.46	0.0511969	0.985
P00519	ABL1	Tyrosine-protein kinase ABL1 OS=Homo sapiens OX=9606 GN=ABL1 PE=1 SV=4	6	6	6	6	122.8	1.093	0.929	1.028	0.951	1.032	1.018	1.002	1.002	1.028	304.5	332.8	282.7	313	289.5	314.4	310	304.9	305	313	-0.199	0.757098	0.965	-0.138	0.82963	0.998
P00533	EGFR	Epidermal growth factor receptor OS=Homo sapiens OX=9606 GN=EGFR PE=1 SV=2	4	4	5	3	134.2	0.827	1.198	1.313	0.835	0.775	0.82	1.047	1.241	1.17	182	150.5	218.1	239	152	141	149.2	190.6	226	212.9	0.645	0.521908	0.953	-2.71	0.0188494	0.968
P00558	PGK1	Phosphoglycerate kinase 1 OS=Homo sapiens OX=9606 GN=PGK1 PE=1 SV=3	58	20	57	16	44.6	1.194	0.787	0.86	1.06	1.207	1.149	1.097	0.841	0.823	9828.3	11731.8	7736.1	8455.1	10415.9	11860.8	11294.6	10784.7	8270.2	8090.2	-0.257	0.822968	0.967	2.02	0.100822	0.991
P00568	AK1	Adenylate kinase isoenzyme 1 OS=Homo sapiens OX=9606 GN=AK1 PE=1 SV=3	26	5	11	5	21.6	0.724	0.955	1.217	0.752	0.898	0.699	0.794	1.261	1.172	1449.9	1049.9	1384.5	1764.2	1090.3	1302	1013.5	1150.9	1828.9	1699.9	0.822	0.529274	0.954	-1.71	0.204112	0.994
P01023	A2M	Alpha-2-macroglobulin OS=Homo sapiens OX=9606 GN=A2M PE=1 SV=3	4	7	8	7	163.2	1.353	0.779	2.013	0.945	0.825	0.669	0.43	0.513	0.651	1926.2	2606	1501.1	3877.5	1820.2	1588.7	1288.9	827.9	987.2	1254.7	-4.72	0.00419203	0.179	-3.38	0.0248167	0.975
P01024	C3	Complement C3 OS=Homo sapiens OX=9606 GN=C3 PE=1 SV=2	3	4	4	4	187	1.145	0.743	1.245	0.912	0.768	0.716	0.7	0.704	0.878	344.8	394.7	256.1	429.2	314.5	264.8	246.8	241.4	242.7	302.6	-2.69	0.0240625	0.528	-2.48	0.0344835	0.98
P01033	TIMP1	Metalloproteinase inhibitor 1 OS=Homo sapiens OX=9606 GN=TIMP1 PE=1 SV=1	6	1	1	1	23.2	0.884	1.193	1.167	0.933	0.876	1.021	0.916	1.157	0.936	171.1	151.1	204	199.7	159.6	149.8	174.6	156.7	197.9	160.1	-0.748	0.4681	0.949	-1.23	0.243535	0.995
P01034	CST3	Cystatin-C OS=Homo sapiens OX=9606 GN=CST3 PE=1 SV=1	14	2	2	2	15.8	0.801	1.106	1.185	0.89	0.924	0.944	0.922	1.015	1.334	518.5	415.6	573.3	614.4	461.2	479.3	489.3	478.1	526.5	691.7	0.19	0.860387	0.968	-1.2	0.281368	0.995
P01036	CST4	Cystatin-S OS=Homo sapiens OX=9606 GN=CST4 PE=1 SV=3	6	1	1	1	16.2	0.868	0.854	0.825	0.765	0.838	0.597	10.811	0.953	2.805	42.4	36.8	36.2	35	32.4	35.5	25.3	458.3	40.4	118.9	5.37	0.00749721	0.286	-0.81	0.62608	0.997
P01111	NRAS	GTPase NRas OS=Homo sapiens OX=9606 GN=NRAS PE=1 SV=1	19	3	4	1	21.2	1.26	1.045	1.287	1.128	0.944	1.165	1.157	1.311	1.279	58.2	73.3	60.8	74.9	65.6	54.9	67.8	67.3	76.2	74.4	0.356	0.657433	0.961	-0.76	0.352431	0.996
P01116	KRAS	GTPase KRas OS=Homo sapiens OX=9606 GN=KRAS PE=1 SV=1	17	3	4	1	21.6	0.881	1.014	1.051	1.136	1.01	0.952	1.082	1.186	1.183	87.1	76.8	88.4	91.6	99	88.1	82.9	94.3	103.4	103.1	1.66	0.0420621	0.676	0.697	0.352004	0.996
P01130	LDLR	Low-density lipoprotein receptor OS=Homo sapiens OX=9606 GN=LDLR PE=1 SV=1	3	2	2	2	95.3	1.032	0.742	0.86	1.087	1.139	1.115	1.136	1.194	0.803	239.6	247.3	177.8	206.1	260.5	272.9	267.3	272.3	286.1	192.5	1.57	0.147344	0.876	2.46	0.0332141	0.98
P01591	JCHAIN	Immunoglobulin J chain OS=Homo sapiens OX=9606 GN=JCHAIN PE=1 SV=4	26	3	3	3	18.1	0.588	0.421	0.483	0.435	0.522	0.456	3.634	0.525	4.266	382.4	224.8	161	184.7	166.3	199.6	174.3	1389.7	200.7	1631.5	5.82	0.0115926	0.363	-0.272	0.888623	0.998
P01833	PIGR	Polymeric immunoglobulin receptor OS=Homo sapiens OX=9606 GN=PIGR PE=1 SV=4	3	2	2	2	83.2	0.231	0.128	0.188	0.153	0.171	0.189	4.045	0.271	5.589	334.2	77.1	42.9	62.8	51	57.3	63	1351.8	90.7	1867.7	6.56	0.0102172	0.342	-0.219	0.918448	0.998
P01834	IGKC	Immunoglobulin kappa constant OS=Homo sapiens OX=9606 GN=IGKC PE=1 SV=2	36	2	2	2	11.8	0.665	0.483	0.557	0.608	0.602	0.613	2.778	0.685	3.019	388.4	258.2	187.7	216.2	235.9	234	237.9	1078.8	265.9	1172.4	5.36	0.00867667	0.313	-0.0659	0.968978	0.998
P01876	IGHA1	Immunoglobulin heavy constant alpha 1 OS=Homo sapiens OX=9606 GN=IGHA1 PE=1 SV=2	13	4	4	4	37.6	0.406	0.372	0.389	0.426	0.447	0.338	3.593	0.436	4.505	110.6	44.9	41.2	43	47.1	49.4	37.4	397.4	48.3	498.3	6.06	0.0109212	0.354	-0.153	0.939014	0.998
P02144	MB	Myoglobin OS=Homo sapiens OX=9606 GN=MB PE=1 SV=2	25	3	4	3	17.2	1.263	0.926	0.534	1.299	1.571	1.399	1.248	0.434	0.576	1280.5	1617.7	1186.3	684.3	1663.1	2011.4	1792	1598.5	555.8	738	-0.794	0.628558	0.959	3.48	0.0530169	0.986
P02533	KRT14	Keratin, type I cytoskeletal 14 OS=Homo sapiens OX=9606 GN=KRT14 PE=1 SV=4	42	18	30	6	51.5	1.405	0.97	1.093	1.155	0.965	1.239	1.047	1.154	1.309	359.9	505.8	348.9	393.2	415.8	347.2	446	376.7	415.3	471	0.249	0.796967	0.966	0.0518	0.957194	0.998
P02538	KRT6A	Keratin, type II cytoskeletal 6A OS=Homo sapiens OX=9606 GN=KRT6A PE=1 SV=3	20	12	28	5	60	1.86	0.435	1.031	1.31	0.644	2.069	0.816	1.044	1.201	662.8	1232.5	288.7	683.4	868.5	426.7	1371.6	541.1	692.3	796.3	-0.374	0.858086	0.968	1.05	0.619655	0.997
P02545	LMNA	Prelamin-A/C OS=Homo sapiens OX=9606 GN=LMNA PE=1 SV=1	55	33	55	32	74.1	0.975	0.981	0.874	1.228	0.872	1.043	1.182	0.765	1.037	9948.3	9701.3	9757.2	8692.7	12214.6	8679.3	10372.1	11754.3	7608.4	10317.7	0.599	0.612975	0.959	1.16	0.337188	0.996
P02749	APOH	Beta-2-glycoprotein 1 OS=Homo sapiens OX=9606 GN=APOH PE=1 SV=3	3	1	1	1	38.3	1.323	0.997	1.582	0.922	0.88	0.714	0.707	0.654	0.681	311.7	412.5	310.7	493.3	287.4	274.2	222.5	220.2	203.7	212.1	-4.54	0.000247278	0.00235	-3.59	0.00139166	0.666
P02765	AHSG	Alpha-2-HS-glycoprotein OS=Homo sapiens OX=9606 GN=AHSG PE=1 SV=2	5	2	8	2	39.3	1.332	0.996	1.597	1.005	0.753	0.691	0.535	0.568	0.559	1294.7	1724	1289.1	2068.1	1301.2	974.9	894.9	692.6	735.4	724.3	-5.02	0.000349658	0.00479	-3.57	0.00377981	0.868
P02768	ALB	Albumin OS=Homo sapiens OX=9606 GN=ALB PE=1 SV=2	24	15	28	15	69.3	0.885	0.419	1.694	0.66	0.492	0.464	0.691	0.542	2.056	4616.7	4088	1933.7	7819.5	3045.6	2273.5	2142.9	3191.6	2500.9	9493.3	-0.274	0.890996	0.969	-2.84	0.176516	0.994
P02786	TFRC	Transferrin receptor protein 1 OS=Homo sapiens OX=9606 GN=TFRC PE=1 SV=2	22	14	16	14	84.8	0.798	0.741	0.647	1.122	0.814	1.23	0.916	1.183	0.962	2488.8	1985.2	1844.2	1610.5	2792.9	2025.4	3060.2	2279.8	2944.2	2393.8	2.31	0.0563038	0.739	2.92	0.021199	0.971
P02788	LTF	Lactotransferrin OS=Homo sapiens OX=9606 GN=LTF PE=1 SV=6	21	11	13	11	78.1	0.809	0.429	1.047	0.654	0.743	0.521	5.56	0.482	2.553	824	666.4	353.3	862.7	538.6	612.3	429.6	4581.3	397.3	2104	4.09	0.0732295	0.786	-1.27	0.548234	0.997
P02794	FTH1	Ferritin heavy chain OS=Homo sapiens OX=9606 GN=FTH1 PE=1 SV=2	10	2	3	2	21.2	0.959	1.483	1.157	0.831	1.025	0.834	0.808	0.858	1.141	619.2	593.9	918.4	716.7	514.5	634.9	516.3	500.1	531	706.4	-2.13	0.081575	0.803	-2.37	0.0560456	0.986
P03928	MT-ATP8	ATP synthase protein 8 OS=Homo sapiens OX=9606 GN=MT-ATP8 PE=1 SV=1	13	1	1	1	8	1.284	0.862	1.124	1.026	0.822	0.964	0.928	0.941	0.96	472.2	606.5	407.2	530.7	484.7	388.1	455.2	438.4	444.2	453.4	-1.57	0.125577	0.86	-1.36	0.17908	0.994
P04004	VTN	Vitronectin OS=Homo sapiens OX=9606 GN=VTN PE=1 SV=1	5	2	5	2	54.3	1.309	1.209	1.109	0.857	0.955	0.837	1.007	0.853	1.202	1082.3	1416.4	1308.7	1200.2	927.6	1034	905.4	1090.1	922.8	1300.7	-1.78	0.0578984	0.744	-3.14	0.00365021	0.863
P04040	CAT	Catalase OS=Homo sapiens OX=9606 GN=CAT PE=1 SV=3	19	8	10	8	59.7	0.607	0.854	1.365	0.498	0.614	0.515	0.599	1.298	1.83	1939.8	1177.8	1655.7	2648.4	966.1	1191.6	999.9	1162.1	2517.2	3550.3	1.53	0.390305	0.942	-2.61	0.156394	0.993
P04049	RAF1	RAF proto-oncogene serine/threonine-protein kinase OS=Homo sapiens OX=9606 GN=RAF1 PE=1 SV=1	8	5	8	2	73	0.92	1.088	0.963	0.807	1.043	0.904	0.876	1.125	1.191	83.2	76.5	90.5	80.1	67.1	86.8	75.2	72.8	93.6	99.1	0.609	0.54412	0.955	-0.657	0.513816	0.997
P04053	DNTT	DNA nucleotidylexotransferase OS=Homo sapiens OX=9606 GN=DNTT PE=1 SV=3	2	1	1	1	58.5	1.429	0.407	2.22	0.926	0.673	0.489	0.169	0.42	0.572	421.5	602.3	171.6	935.7	390.2	283.8	206.1	71.1	176.9	241	-4.8	0.0138688	0.39	-3.69	0.0453938	0.984
P04062	GBA	Lysosomal acid glucosylceramidase OS=Homo sapiens OX=9606 GN=GBA PE=1 SV=3	8	4	6	4	59.7	1.015	1.107	0.932	1.124	1.42	1.244	1.015	0.912	0.818	1121.5	1138.3	1241.9	1045.7	1260.6	1592.8	1394.6	1137.9	1023	917.4	-1.02	0.198161	0.902	2.11	0.0172033	0.966
P04066	FUCA1	Tissue alpha-L-fucosidase OS=Homo sapiens OX=9606 GN=FUCA1 PE=1 SV=4	5	2	2	2	53.7	0.916	0.965	1.115	0.885	1.024	0.847	0.812	0.976	1.124	296.1	271.3	285.8	330.1	262.1	303.1	250.9	240.4	289.2	333	-0.407	0.666482	0.961	-0.818	0.393351	0.996
P04075	ALDOA	Fructose-bisphosphate aldolase A OS=Homo sapiens OX=9606 GN=ALDOA PE=1 SV=2	64	18	56	15	39.4	1.073	0.85	0.944	1.016	1.117	1.05	1.092	0.961	0.902	8221.9	8819.2	6991.4	7758.3	8355.7	9184.8	8633.5	8980.8	7897.2	7418.2	0.218	0.79389	0.966	1.24	0.158869	0.993
P04080	CSTB	Cystatin-B OS=Homo sapiens OX=9606 GN=CSTB PE=1 SV=2	53	4	8	4	11.1	1.003	1.172	1.462	1.052	1.074	0.948	1.167	1.283	1.037	1685.6	1690.3	1975.2	2464.9	1772.9	1810.9	1598	1966.3	2162.4	1748	-0.0726	0.933108	0.97	-1.1	0.2201	0.994
P04083	ANXA1	Annexin A1 OS=Homo sapiens OX=9606 GN=ANXA1 PE=1 SV=2	24	6	8	6	38.7	0.822	0.558	1.078	1.416	0.856	1.479	1.278	0.748	0.492	1037.1	853	578.8	1118.5	1469	887.6	1534.2	1325.7	776.1	510.5	0.363	0.834508	0.967	2.89	0.11787	0.992
P04179	SOD2	Superoxide dismutase [Mn], mitochondrial OS=Homo sapiens OX=9606 GN=SOD2 PE=1 SV=3	10	2	3	2	24.7	1.036	0.899	0.909	1.073	1.04	1.021	0.967	0.838	0.837	442.5	458.2	397.8	402.2	474.9	460	451.6	427.7	370.8	370.6	-0.728	0.283508	0.925	1.23	0.0839695	0.99
P04181	OAT	Ornithine aminotransferase, mitochondrial OS=Homo sapiens OX=9606 GN=OAT PE=1 SV=1	24	9	12	9	48.5	1.577	1.015	0.504	1.463	1.453	1.257	1.28	0.567	0.5	1495.1	2357.9	1517.8	753.9	2187.3	2172.3	1879	1913.7	848.4	746.8	-1.34	0.457777	0.948	2.74	0.145038	0.993
P04183	TK1	Thymidine kinase, cytosolic OS=Homo sapiens OX=9606 GN=TK1 PE=1 SV=2	14	3	4	3	25.5	1.069	0.952	0.817	1.238	1.108	1.165	1.269	0.987	0.743	422.4	451.7	402.2	345	523.1	468.2	492.3	536.2	417	313.9	0.459	0.684165	0.962	2.3	0.0613996	0.987
P04217	A1BG	Alpha-1B-glycoprotein OS=Homo sapiens OX=9606 GN=A1BG PE=1 SV=4	1	1	2	1	54.2	1.42	1.044	1.513	0.999	0.967	0.842	0.625	0.741	0.885	463.3	658.1	483.7	701.1	462.6	447.9	390.2	289.6	343.4	410	-4.38	0.000350156	0.0048	-2.84	0.00644127	0.92
P04264	KRT1	Keratin, type II cytoskeletal 1 OS=Homo sapiens OX=9606 GN=KRT1 PE=1 SV=6	45	25	75	23	66	1.544	1.111	1.125	0.988	1.034	1.506	1.186	1.439	1.373	5685.4	8780.1	6315.8	6397.7	5615	5876.7	8559.5	6740.9	8178.8	7805.9	0.513	0.595042	0.958	-0.662	0.494889	0.997
P04406	GAPDH	Glyceraldehyde-3-phosphate dehydrogenase OS=Homo sapiens OX=9606 GN=GAPDH PE=1 SV=3	50	14	98	14	36	1.05	0.873	1.075	0.966	1.058	0.983	0.994	0.968	0.919	21755.5	22846.8	18995.1	23380.8	21009	23022.7	21387.2	21630.9	21061	20003.4	-0.584	0.416455	0.944	0.0294	0.966763	0.998
P04424	ASL	Argininosuccinate lyase OS=Homo sapiens OX=9606 GN=ASL PE=1 SV=4	27	12	13	12	51.6	0.782	1.112	1.083	1.109	1.142	1.005	0.884	1.143	0.93	1704.6	1333.9	1895.4	1846.1	1890.8	1947.1	1712.9	1506.8	1948.8	1584.5	-0.236	0.818212	0.967	1.15	0.275511	0.995
P04439	HLA-A	HLA class I histocompatibility antigen, A alpha chain OS=Homo sapiens OX=9606 GN=HLA-A PE=1 SV=2	10	2	2	2	40.8	0.979	0.719	0.411	1.372	1.737	1.591	0.856	0.426	0.456	84.9	83.1	61	34.9	116.5	147.4	135.1	72.7	36.2	38.7	-0.788	0.364844	0.938	5.34	7.16141e-05	0.018
P04626	ERBB2	Receptor tyrosine-protein kinase erbB-2 OS=Homo sapiens OX=9606 GN=ERBB2 PE=1 SV=1	2	2	3	1	137.8	1.037	1.665	1.238	1.59	1.126	1.283	1.189	1.114	1.338	54.6	56.6	91	67.6	86.9	61.5	70.1	65	60.9	73.1	-0.156	0.850096	0.968	0.573	0.492496	0.997
P04632	CAPNS1	Calpain small subunit 1 OS=Homo sapiens OX=9606 GN=CAPNS1 PE=1 SV=1	38	6	6	6	28.3	0.748	1.047	1.191	0.768	0.872	0.739	0.769	1.181	1.434	1010.9	756.6	1058.9	1203.5	775.9	881.2	747.5	777.4	1193.8	1449.4	0.692	0.607608	0.958	-2.02	0.152115	0.993
P04792	HSPB1	Heat shock protein beta-1 OS=Homo sapiens OX=9606 GN=HSPB1 PE=1 SV=2	61	10	26	10	22.8	0.823	1.23	1.26	0.832	1.091	0.796	1.243	1.192	1.108	3547.8	2919.3	4365.4	4470.5	2950.2	3869.2	2823	4410.1	4229.2	3931.5	0.944	0.440661	0.947	-1.64	0.193054	0.994
P04818	TYMS	Thymidylate synthase OS=Homo sapiens OX=9606 GN=TYMS PE=1 SV=3	17	4	5	4	35.7	0.821	0.633	0.862	0.832	0.708	0.791	0.921	1.249	1.31	211.4	173.5	133.8	182.1	175.9	149.7	167.2	194.6	264	277	3.07	0.00367431	0.162	-0.177	0.832729	0.998
P04843	RPN1	Dolichyl-diphosphooligosaccharide--protein glycosyltransferase subunit 1 OS=Homo sapiens OX=9606 GN=RPN1 PE=1 SV=1	36	22	40	22	68.5	0.946	0.902	0.971	0.987	1.073	0.998	0.941	1.119	0.997	10146	9596	9146.7	9853.2	10014.9	10884.6	10121.2	9543.5	11352.8	10119.2	0.775	0.241075	0.915	1.03	0.127722	0.992
P04844	RPN2	Dolichyl-diphosphooligosaccharide--protein glycosyltransferase subunit 2 OS=Homo sapiens OX=9606 GN=RPN2 PE=1 SV=3	12	7	12	7	69.2	0.964	0.808	1.062	0.902	0.814	0.956	0.888	1.118	0.869	1843.8	1776.7	1489.9	1958.6	1662.5	1501.4	1762.6	1636.8	2061	1602.2	-0.0136	0.987725	0.971	-0.691	0.441328	0.996
P04899	GNAI2	Guanine nucleotide-binding protein G(i) subunit alpha-2 OS=Homo sapiens OX=9606 GN=GNAI2 PE=1 SV=3	4	1	1	1	40.4	0.799	0.73	1.112	0.807	0.754	0.838	0.778	1.191	1.019	90.5	72.3	66	100.6	73	68.2	75.8	70.4	107.7	92.1	0.872	0.443552	0.947	-1	0.379808	0.996
P04920	SLC4A2	Anion exchange protein 2 OS=Homo sapiens OX=9606 GN=SLC4A2 PE=1 SV=4	5	4	4	4	136.9	0.813	0.931	1.006	1.017	0.843	0.938	1.035	1.12	1.219	131.8	107.2	122.7	132.6	134.1	111.1	123.7	136.4	147.6	160.7	2.04	0.0162809	0.412	0.211	0.771898	0.997
P05023	ATP1A1	Sodium/potassium-transporting ATPase subunit alpha-1 OS=Homo sapiens OX=9606 GN=ATP1A1 PE=1 SV=1	14	11	13	11	112.8	0.6	0.67	0.639	1.039	0.661	1.184	0.627	1.392	1.247	1717.1	1030.2	1151.2	1097.5	1783.7	1135.6	2032.9	1076	2389.4	2140.6	3.24	0.0544237	0.732	2.68	0.101373	0.991
P05026	ATP1B1	Sodium/potassium-transporting ATPase subunit beta-1 OS=Homo sapiens OX=9606 GN=ATP1B1 PE=1 SV=1	30	8	12	8	35	0.732	1.084	0.934	0.92	0.963	1.151	0.375	1.12	0.883	2445.2	1790.9	2650.5	2284	2250.4	2354.6	2813.6	917.1	2739.1	2159.5	-0.478	0.718112	0.963	0.902	0.498741	0.997
P05060	CHGB	Secretogranin-1 OS=Homo sapiens OX=9606 GN=CHGB PE=1 SV=2	10	5	5	5	78.2	0.869	1.275	1.279	0.955	1.057	1.106	0.767	1.08	0.918	217.3	188.9	277.1	278	207.6	229.6	240.2	166.7	234.8	199.4	-1.77	0.145358	0.875	-0.394	0.732199	0.997
P05091	ALDH2	Aldehyde dehydrogenase, mitochondrial OS=Homo sapiens OX=9606 GN=ALDH2 PE=1 SV=2	3	1	1	1	56.3	0.538	0.309	1.102	0.573	0.639	0.227	0.63	1.731	2.255	43.1	23.2	13.3	47.5	24.7	27.5	9.8	27.1	74.6	97.1	3.47	0.0780642	0.796	-1.45	0.432158	0.996
P05109	S100A8	Protein S100-A8 OS=Homo sapiens OX=9606 GN=S100A8 PE=1 SV=1	12	1	1	1	10.8	0.7	0.397	0.515	0.504	0.656	0.745	1.8	0.695	3.47	148.6	104.1	59	76.6	74.8	97.6	110.7	267.5	103.3	515.7	5.16	0.00862214	0.312	0.157	0.922973	0.998
P05141	SLC25A5	ADP/ATP translocase 2 OS=Homo sapiens OX=9606 GN=SLC25A5 PE=1 SV=7	38	12	30	3	32.8	0.919	1.037	0.969	0.969	0.998	1.023	0.999	1.006	1.043	1904	1750.1	1974.7	1845.1	1844.5	1899.6	1947.3	1901.9	1915.1	1985.2	0.428	0.459775	0.948	0.394	0.494635	0.997
P05161	ISG15	Ubiquitin-like protein ISG15 OS=Homo sapiens OX=9606 GN=ISG15 PE=1 SV=5	38	6	10	6	17.9	0.873	1.042	1.192	0.909	0.991	0.877	0.861	1.151	1.007	2348.9	2050.2	2447.6	2800	2135.8	2327.6	2060.1	2022	2703.3	2366.2	-0.335	0.734945	0.964	-1.11	0.276076	0.995
P05166	PCCB	Propionyl-CoA carboxylase beta chain, mitochondrial OS=Homo sapiens OX=9606 GN=PCCB PE=1 SV=3	7	3	3	3	58.2	0.896	1.032	1.023	0.907	1.19	0.939	0.873	0.913	1.246	378.8	339.5	390.8	387.6	343.6	450.9	355.6	330.8	345.9	471.8	-0.0595	0.956321	0.971	0.244	0.822537	0.997
P05198	EIF2S1	Eukaryotic translation initiation factor 2 subunit 1 OS=Homo sapiens OX=9606 GN=EIF2S1 PE=1 SV=3	49	15	25	15	36.1	1.038	1.044	0.953	0.984	1.026	0.997	0.943	0.963	0.982	3293.1	3417.6	3437	3139	3240.4	3380	3282.8	3104.7	3170.4	3234.3	-0.712	0.210366	0.906	-0.013	0.980932	0.998
P05387	RPLP2	60S acidic ribosomal protein P2 OS=Homo sapiens OX=9606 GN=RPLP2 PE=1 SV=1	46	3	7	3	11.7	0.879	0.623	1.162	0.812	0.732	0.995	0.95	0.982	1.026	2879.2	2529.9	1792.7	3344.9	2336.5	2108.1	2863.4	2736.3	2827.4	2953.1	0.542	0.611968	0.959	-0.603	0.573283	0.997
P05388	RPLP0	60S acidic ribosomal protein P0 OS=Homo sapiens OX=9606 GN=RPLP0 PE=1 SV=1	36	8	25	8	34.3	1.035	1.048	1.013	0.946	0.965	0.967	0.904	0.979	0.939	6777.4	7012.9	7104.7	6862.4	6411.1	6539.2	6550.5	6129.1	6634.1	6363.2	-1.19	0.0362396	0.64	-0.844	0.116707	0.992
P05423	POLR3D	DNA-directed RNA polymerase III subunit RPC4 OS=Homo sapiens OX=9606 GN=POLR3D PE=1 SV=2	14	5	5	5	44.4	1.019	1.105	1.003	0.994	0.991	0.954	0.976	1.021	0.956	810.5	826	895.9	812.8	805.5	803	773.2	790.8	827.4	775.1	-0.708	0.206881	0.905	-0.622	0.263197	0.995
P05452	CLEC3B	Tetranectin OS=Homo sapiens OX=9606 GN=CLEC3B PE=1 SV=3	10	1	1	1	22.5	1.025	1.227	1.027	1.077	1.025	1.126	1.177	1.058	0.799	51	52.3	62.6	52.4	54.9	52.3	57.4	60	53.9	40.7	-0.629	0.509132	0.952	0.187	0.843192	0.998
P05455	SSB	Lupus La protein OS=Homo sapiens OX=9606 GN=SSB PE=1 SV=2	13	6	10	6	46.8	1.065	0.993	1.067	0.966	0.983	1.018	0.912	0.926	0.978	3006	3200.2	2984.3	3208.7	2904.1	2954.7	3058.9	2742.8	2783.8	2940.2	-1.35	0.0293396	0.584	-0.558	0.32099	0.996
P05496	ATP5MC1	ATP synthase F(0) complex subunit C1, mitochondrial OS=Homo sapiens OX=9606 GN=ATP5MC1 PE=1 SV=2	5	1	4	1	14.3	0.971	0.795	1.002	0.921	0.818	1.047	0.841	1.15	1.042	1625.1	1577.7	1291.9	1628.1	1496.9	1328.6	1702.2	1366.2	1869.5	1692.7	0.702	0.48026	0.95	0.0285	0.976817	0.998
P05543	SERPINA7	Thyroxine-binding globulin OS=Homo sapiens OX=9606 GN=SERPINA7 PE=1 SV=2	2	1	2	1	46.3	1.333	1.316	1.5	0.968	0.767	0.662	0.511	0.683	0.711	280.8	374.5	369.6	421.2	271.9	215.5	186	143.5	191.9	199.8	-5.41	1.11989e-05	1.02e-07	-4.45	6.00083e-05	0.0138
P05549	TFAP2A	Transcription factor AP-2-alpha OS=Homo sapiens OX=9606 GN=TFAP2A PE=1 SV=1	5	2	3	2	48	1.286	1.495	0.575	1.561	1.425	1.719	1.642	0.572	0.577	396.1	509.3	592.3	227.6	618.4	564.5	680.9	650.4	226.5	228.6	-1.54	0.430543	0.946	2.6	0.194525	0.994
P05556	ITGB1	Integrin beta-1 OS=Homo sapiens OX=9606 GN=ITGB1 PE=1 SV=2	15	10	13	10	88.4	1.008	1.041	0.977	0.905	0.886	0.932	0.969	1.002	1.069	1504.5	1516.9	1566.8	1469.2	1361.1	1332.3	1402.4	1457.6	1507.7	1607.6	-0.0828	0.876226	0.969	-1.19	0.0439257	0.984
P05771	PRKCB	Protein kinase C beta type OS=Homo sapiens OX=9606 GN=PRKCB PE=1 SV=4	2	1	1	1	76.8	0.971	1.02	0.936	0.818	0.954	0.984	0.977	0.775	0.917	35.9	34.8	36.6	33.5	29.3	34.2	35.3	35	27.8	32.9	-0.832	0.276246	0.924	-0.557	0.458479	0.996
P05783	KRT18	Keratin, type I cytoskeletal 18 OS=Homo sapiens OX=9606 GN=KRT18 PE=1 SV=2	61	22	77	20	48	0.717	1.283	1.299	0.64	0.853	0.591	0.685	1.372	1.267	12363.9	8868.5	15857	16054.9	7914.8	10542.2	7307.9	8474.2	16965.1	15666.8	-0.0323	0.983783	0.971	-3.18	0.0666533	0.988
P05787	KRT8	Keratin, type II cytoskeletal 8 OS=Homo sapiens OX=9606 GN=KRT8 PE=1 SV=7	57	27	124	23	53.7	0.781	1.653	1.234	0.758	0.98	0.709	0.738	1.289	1.227	14548	11357.7	24045.7	17948.5	11021.6	14250.3	10312.9	10740.9	18750.5	17848.3	-0.518	0.744565	0.964	-2.74	0.106389	0.991
P06132	UROD	Uroporphyrinogen decarboxylase OS=Homo sapiens OX=9606 GN=UROD PE=1 SV=2	7	3	4	3	40.8	0.873	0.996	1.05	0.982	0.961	0.98	0.906	1.082	1.022	388.6	339.2	387	408.2	381.6	373.3	380.9	351.9	420.3	397	0.228	0.747758	0.964	0.0844	0.905174	0.998
P06213	INSR	Insulin receptor OS=Homo sapiens OX=9606 GN=INSR PE=1 SV=4	1	1	1	1	156.2	0.904	0.913	1.154	0.873	0.894	0.889	1.03	1.11	1.283	41.4	37.5	37.9	47.8	36.2	37.1	36.9	42.7	46	53.2	1.41	0.088887	0.816	-1.14	0.156541	0.993
P06280	GLA	Alpha-galactosidase A OS=Homo sapiens OX=9606 GN=GLA PE=1 SV=1	4	2	2	2	48.7	1.183	1.07	0.938	1.022	0.937	0.896	0.957	0.92	0.978	440.4	520.8	471.2	413.2	450.2	412.5	394.7	421.5	405.4	430.8	-1.3	0.110837	0.845	-1.14	0.156071	0.993
P06307	CCK	Cholecystokinin OS=Homo sapiens OX=9606 GN=CCK PE=1 SV=1	8	1	1	1	12.7	0.508	0.766	0.501	0.553	0.908	0.572	5.106	1.785	4.887	182.2	92.6	139.5	91.3	100.8	165.6	104.3	930.5	325.4	890.7	8.06	2.42438e-06	4.14e-11	0.327	0.708937	0.997
P06396	GSN	Gelsolin OS=Homo sapiens OX=9606 GN=GSN PE=1 SV=1	9	5	7	5	85.6	1.081	0.968	1.056	1.325	0.698	1.035	1.005	0.824	0.935	256.5	277.2	248.4	270.9	339.7	179	265.4	257.9	211.4	239.8	-1.28	0.297018	0.928	-0.159	0.894298	0.998
P06400	RB1	Retinoblastoma-associated protein OS=Homo sapiens OX=9606 GN=RB1 PE=1 SV=2	17	14	18	14	106.1	0.978	0.754	0.788	1.298	1.117	1.355	1.09	0.822	0.675	2452.7	2397.8	1850.3	1933.2	3184.6	2738.6	3324	2673.4	2014.9	1654.7	0.399	0.690577	0.962	3.71	0.00330921	0.85
P06493	CDK1	Cyclin-dependent kinase 1 OS=Homo sapiens OX=9606 GN=CDK1 PE=1 SV=3	41	10	19	9	34.1	1.067	0.97	0.826	1.121	1.108	1.133	1.005	0.855	0.925	2273.5	2425.2	2205.4	1878	2547.5	2519	2575.7	2285.5	1944.8	2102.1	-0.416	0.591558	0.957	1.88	0.0312235	0.979
P06576	ATP5F1B	ATP synthase subunit beta, mitochondrial OS=Homo sapiens OX=9606 GN=ATP5F1B PE=1 SV=3	46	17	64	17	56.5	1.024	1.107	1.07	0.914	0.951	0.924	0.952	1.034	1.074	9109.4	9329.1	10081.6	9744.2	8322	8663.6	8419.5	8675.7	9421.9	9781.2	-0.646	0.249688	0.918	-1.58	0.0135249	0.958
P06703	S100A6	Protein S100-A6 OS=Homo sapiens OX=9606 GN=S100A6 PE=1 SV=1	24	3	5	3	10.2	0.977	1.452	0.448	1.635	1.023	1.554	1.379	0.544	0.638	1388.6	1356.1	2015.7	621.9	2270.3	1420.9	2157.5	1914.5	755.9	885.8	-0.666	0.722777	0.964	2.76	0.161432	0.993
P06730	EIF4E	Eukaryotic translation initiation factor 4E OS=Homo sapiens OX=9606 GN=EIF4E PE=1 SV=2	20	4	9	4	25.1	1.043	1.051	1.056	0.936	0.962	0.977	0.933	0.974	0.949	664.8	693.5	698.8	702.1	622.2	639.7	649.2	620.2	647.5	631.2	-1.27	0.0245075	0.533	-1.06	0.0510111	0.985
P06733	ENO1	Alpha-enolase OS=Homo sapiens OX=9606 GN=ENO1 PE=1 SV=2	53	18	70	17	47.1	1.057	0.889	1.024	0.888	0.991	0.912	0.949	0.952	1.052	13683.4	14463	12160.6	14012.9	12144.3	13555.2	12481.1	12981.1	13023.6	14393.2	-0.301	0.66299	0.961	-0.778	0.272675	0.995
P06737	PYGL	Glycogen phosphorylase, liver form OS=Homo sapiens OX=9606 GN=PYGL PE=1 SV=4	11	7	8	6	97.1	1.122	0.738	0.876	0.594	0.976	0.676	0.878	1.399	1.263	747.1	838.5	551.6	654.2	443.7	729.1	505.3	655.9	1044.9	943.4	1.75	0.201664	0.903	-1.34	0.319564	0.996
P06744	GPI	Glucose-6-phosphate isomerase OS=Homo sapiens OX=9606 GN=GPI PE=1 SV=4	23	13	28	13	63.1	1.092	0.841	0.967	0.932	1.059	0.957	0.963	0.904	0.942	5628.5	6147.7	4732.4	5444.1	5247.8	5959.2	5386.9	5422.3	5085.7	5300	-0.548	0.487335	0.951	0.0984	0.899659	0.998
P06748	NPM1	Nucleophosmin OS=Homo sapiens OX=9606 GN=NPM1 PE=1 SV=2	36	9	37	9	32.6	1.14	1.018	0.992	0.946	0.92	0.938	0.913	0.861	0.939	6502.5	7411.5	6621.5	6451.9	6153.2	5979.3	6101.7	5935	5596.5	6107.8	-1.71	0.015329	0.404	-1.33	0.0471285	0.984
P06753	TPM3	Tropomyosin alpha-3 chain OS=Homo sapiens OX=9606 GN=TPM3 PE=1 SV=2	16	5	9	1	32.9	0.809	0.765	0.685	0.883	0.416	1.017	0.875	0.987	1.061	224.6	181.7	172	154	198.4	93.5	228.4	196.6	221.7	238.4	1.71	0.0935849	0.823	0.646	0.500005	0.997
P06756	ITGAV	Integrin alpha-V OS=Homo sapiens OX=9606 GN=ITGAV PE=1 SV=2	1	1	1	1	116	0.82	1.212	0.565	1.396	1.312	1.08	1.06	0.93	0.807	115.8	94.9	140.3	65.4	161.6	151.8	125.1	122.7	107.7	93.4	0.399	0.743738	0.964	3.27	0.0201398	0.97
P06865	HEXA	Beta-hexosaminidase subunit alpha OS=Homo sapiens OX=9606 GN=HEXA PE=1 SV=2	7	4	6	4	60.7	0.927	1.141	1.056	0.996	1.055	0.996	1.03	0.966	1.035	340.8	316.1	388.8	359.9	339.4	359.6	339.4	351.1	329.3	352.7	-0.298	0.666994	0.961	-0.0325	0.962417	0.998
P07099	EPHX1	Epoxide hydrolase 1 OS=Homo sapiens OX=9606 GN=EPHX1 PE=1 SV=1	9	4	4	4	52.9	0.904	1.4	0.939	0.883	1.04	0.835	0.87	1.442	1.219	287.9	260.2	403	270.4	254.3	299.6	240.5	250.5	415.1	350.9	0.784	0.557469	0.955	-1.09	0.416705	0.996
P07108	DBI	Acyl-CoA-binding protein OS=Homo sapiens OX=9606 GN=DBI PE=1 SV=2	41	2	4	2	10	0.637	0.594	0.861	1.169	1.416	1.21	1.408	0.785	0.679	646.6	411.7	383.8	556.7	756.2	915.4	782.6	910.3	507.4	438.9	1.86	0.166764	0.887	4.7	0.003594	0.861
P07195	LDHB	L-lactate dehydrogenase B chain OS=Homo sapiens OX=9606 GN=LDHB PE=1 SV=2	35	11	48	9	36.6	0.925	0.928	1.195	0.842	0.882	0.875	0.791	1.048	1.073	7164.4	6627.7	6646.2	8562.2	6032.1	6322.1	6268.7	5663.8	7506.6	7685.4	-0.408	0.660865	0.961	-1.54	0.117655	0.992
P07205	PGK2	Phosphoglycerate kinase 2 OS=Homo sapiens OX=9606 GN=PGK2 PE=1 SV=3	14	5	9	1	44.8	1.293	0.883	0.951	1.158	1.431	1.286	1.185	0.868	0.773	199.8	258.3	176.5	190	231.5	286	257	236.8	173.4	154.4	-0.748	0.542384	0.955	2.22	0.0903144	0.99
P07237	P4HB	Protein disulfide-isomerase OS=Homo sapiens OX=9606 GN=P4HB PE=1 SV=3	52	25	71	25	57.1	1.025	0.971	0.975	1.025	1.108	0.943	0.95	0.999	0.894	16941.8	17371.4	16448.9	16524.6	17362.6	18766.4	15980.3	16096.6	16927.2	15146.2	-0.569	0.381453	0.941	0.466	0.470437	0.996
P07305	H1-0	Histone H1.0 OS=Homo sapiens OX=9606 GN=H1-0 PE=1 SV=3	21	4	8	4	20.9	0.836	0.81	0.675	1.576	1.344	1.36	1.283	0.981	0.693	1535.9	1283.5	1243.4	1036.6	2420.4	2064.5	2089	1971	1506	1065.1	1.94	0.0886887	0.816	5.04	0.000610926	0.386
P07311	ACYP1	Acylphosphatase-1 OS=Homo sapiens OX=9606 GN=ACYP1 PE=1 SV=2	37	4	6	4	11.3	1.039	1.011	0.962	1.086	1.095	1.153	1.025	0.945	0.96	930.5	966.4	940.9	895.6	1010.8	1019	1073.2	954	879	893.3	-0.39	0.512849	0.953	1.32	0.0441806	0.984
P07339	CTSD	Cathepsin D OS=Homo sapiens OX=9606 GN=CTSD PE=1 SV=1	36	11	23	11	44.5	1.014	1.374	1.135	0.967	1.011	0.989	0.983	0.881	0.994	4355.8	4415.8	5984.5	4943	4211.6	4402.7	4309.7	4281.1	3837.6	4328.3	-1.97	0.0160798	0.41	-1.41	0.0655141	0.988
P07355	ANXA2	Annexin A2 OS=Homo sapiens OX=9606 GN=ANXA2 PE=1 SV=2	16	5	8	5	38.6	1.106	0.646	0.332	1.082	0.604	1.023	1.076	0.516	0.776	166.4	184.1	107.5	55.3	180.1	100.5	170.2	179.1	85.9	129.2	0.241	0.878488	0.969	1.16	0.465915	0.996
P07384	CAPN1	Calpain-1 catalytic subunit OS=Homo sapiens OX=9606 GN=CAPN1 PE=1 SV=1	13	10	10	10	81.8	0.668	0.877	1.397	0.645	0.826	0.658	0.73	1.244	1.491	699.9	467.4	613.5	977.9	451.7	577.9	460.3	511.2	870.5	1043.8	1.2	0.452519	0.948	-2.09	0.203779	0.994
P07437	TUBB	Tubulin beta chain OS=Homo sapiens OX=9606 GN=TUBB PE=1 SV=2	42	14	98	2	49.6	0.981	0.962	1.051	0.842	0.911	0.912	0.901	1.025	1.054	2150	2108.6	2067.4	2259.1	1811.1	1958.4	1959.9	1938.2	2204.1	2266.3	-0.205	0.740549	0.964	-1.27	0.0615816	0.987
P07686	HEXB	Beta-hexosaminidase subunit beta OS=Homo sapiens OX=9606 GN=HEXB PE=1 SV=3	11	6	9	6	63.1	0.962	1.072	1.048	0.924	1.064	0.964	1.064	1.02	1.085	803	772.1	860.5	841.5	742	854.2	773.9	854.4	818.7	870.9	0.301	0.649835	0.96	-0.416	0.53244	0.997
P07737	PFN1	Profilin-1 OS=Homo sapiens OX=9606 GN=PFN1 PE=1 SV=2	69	8	33	8	15	0.911	0.92	0.968	0.953	1.033	0.996	0.894	0.917	0.883	6958.9	6338.4	6403.3	6733.2	6634.3	7189.4	6933.7	6222.7	6378.4	6145	-0.439	0.417965	0.945	0.8	0.154056	0.993
P07738	BPGM	Bisphosphoglycerate mutase OS=Homo sapiens OX=9606 GN=BPGM PE=1 SV=2	5	1	1	1	30	0.886	1.141	1.364	0.893	0.891	0.778	1.062	1.085	1.273	108.9	96.5	124.3	148.6	97.2	97	84.7	115.6	118.1	138.7	0.39	0.675347	0.962	-2.44	0.0220494	0.972
P07741	APRT	Adenine phosphoribosyltransferase OS=Homo sapiens OX=9606 GN=APRT PE=1 SV=2	26	5	12	5	19.6	0.945	1.123	0.887	1.069	1.138	1.068	0.781	0.809	0.988	2662.8	2515	2990.1	2362.5	2845.4	3029.6	2844.2	2079.6	2154.4	2631.2	-1.25	0.133158	0.866	1.45	0.0867695	0.99
P07814	EPRS1	Bifunctional glutamate/proline--tRNA ligase OS=Homo sapiens OX=9606 GN=EPRS1 PE=1 SV=5	32	40	78	40	170.5	1.114	1.01	0.944	1.031	1.001	1.032	1.037	0.968	0.863	15534.3	17308.8	15684.4	14671.3	16009.4	15548.2	16024.8	16109.6	15034.3	13407	-0.722	0.334535	0.934	0.147	0.840632	0.998
P07858	CTSB	Cathepsin B OS=Homo sapiens OX=9606 GN=CTSB PE=1 SV=3	8	2	4	2	37.8	0.894	1.042	1.091	0.977	1.014	0.917	0.953	1.081	1.137	238.9	213.6	248.9	260.7	233.5	242.4	219.1	227.7	258.3	271.7	0.405	0.592225	0.957	-0.361	0.632475	0.997
P07900	HSP90AA1	Heat shock protein HSP 90-alpha OS=Homo sapiens OX=9606 GN=HSP90AA1 PE=1 SV=5	40	24	106	15	84.6	0.962	0.716	0.83	1.009	0.759	1.109	1.05	0.9	0.977	12797.9	12308.2	9160.4	10624.2	12911.6	9710.8	14195.8	13438	11517	12504.2	1.17	0.252792	0.919	1.27	0.21611	0.994
P07910	HNRNPC	Heterogeneous nuclear ribonucleoproteins C1/C2 OS=Homo sapiens OX=9606 GN=HNRNPC PE=1 SV=4	28	8	23	7	33.7	1.026	0.999	0.955	1.073	1.023	1.013	1.065	1.02	1.073	3124.5	3205.7	3120.9	2983.8	3352.8	3197.5	3165.4	3326.4	3186.4	3352.8	0.592	0.29502	0.928	0.659	0.246775	0.995
P07919	UQCRH	Cytochrome b-c1 complex subunit 6, mitochondrial OS=Homo sapiens OX=9606 GN=UQCRH PE=1 SV=2	53	4	7	4	10.7	1.099	1.038	1.069	1.061	0.875	0.979	0.932	1.094	1.076	605.7	665.8	628.9	647.4	642.9	530.2	593.1	564.6	662.7	652	-0.569	0.445996	0.947	-1	0.192671	0.994
P07947	YES1	Tyrosine-protein kinase Yes OS=Homo sapiens OX=9606 GN=YES1 PE=1 SV=3	7	3	4	2	60.8	1.09	1.026	0.95	0.983	0.985	1.069	0.991	0.936	1.026	223.9	244	229.8	212.7	220.1	220.6	239.3	221.8	209.6	229.9	-0.555	0.413735	0.944	-0.0194	0.976805	0.998
P07954	FH	Fumarate hydratase, mitochondrial OS=Homo sapiens OX=9606 GN=FH PE=1 SV=3	44	17	42	17	54.6	1.023	1.051	0.947	1.029	1.092	1.001	0.993	0.952	0.935	8004.3	8187.5	8415.2	7579.9	8234.7	8742.3	8015.6	7946	7617.7	7480.2	-0.609	0.315153	0.931	0.534	0.376057	0.996
P07996	THBS1	Thrombospondin-1 OS=Homo sapiens OX=9606 GN=THBS1 PE=1 SV=2	12	11	12	11	129.3	0.688	0.542	1.706	0.496	0.433	0.442	0.477	1.239	1.466	522.5	359.5	283.2	891.2	259.4	226.1	231.2	249.2	647.4	765.8	1.11	0.561673	0.956	-2.78	0.162996	0.993
P08047	SP1	Transcription factor Sp1 OS=Homo sapiens OX=9606 GN=SP1 PE=1 SV=3	4	2	3	2	80.6	1.125	0.849	0.982	1.125	1.123	1.032	1.065	0.957	0.877	183.8	206.8	156.1	180.6	206.9	206.5	189.7	195.8	175.9	161.1	-0.267	0.758068	0.965	1.29	0.156118	0.993
P08133	ANXA6	Annexin A6 OS=Homo sapiens OX=9606 GN=ANXA6 PE=1 SV=3	27	18	26	18	75.8	0.604	1.193	1.218	0.635	1.019	0.535	0.651	1.526	1.471	4757.2	2874.8	5676.8	5795.5	3023.1	4848.8	2546.8	3097.2	7260.1	6998.2	0.793	0.6675	0.961	-2.15	0.257389	0.995
P08195	SLC3A2	4F2 cell-surface antigen heavy chain OS=Homo sapiens OX=9606 GN=SLC3A2 PE=1 SV=3	12	6	7	6	68	1.156	0.92	0.569	1.364	0.838	1.307	1.093	0.819	0.584	1452.7	1679.6	1336.5	826.7	1980.9	1218	1898.9	1588.2	1189.6	848.3	-0.451	0.777124	0.965	1.96	0.235477	0.995
P08236	GUSB	Beta-glucuronidase OS=Homo sapiens OX=9606 GN=GUSB PE=1 SV=2	8	5	5	5	74.7	1.181	1.125	0.815	1.287	1.302	1.165	1.148	0.882	0.807	1239.9	1464.8	1395.1	1010.1	1595.2	1613.9	1444	1422.8	1094.1	1000.7	-0.932	0.423712	0.945	1.89	0.121158	0.992
P08237	PFKM	ATP-dependent 6-phosphofructokinase, muscle type OS=Homo sapiens OX=9606 GN=PFKM PE=1 SV=2	34	22	43	19	85.1	1.052	1.007	0.93	0.998	0.921	1.025	1.067	0.922	1.063	5368.4	5650.1	5404	4991.2	5359.4	4942.6	5500.8	5730.3	4952	5709.2	0.134	0.856634	0.968	-0.111	0.880323	0.998
P08238	HSP90AB1	Heat shock protein HSP 90-beta OS=Homo sapiens OX=9606 GN=HSP90AB1 PE=1 SV=4	41	24	104	14	83.2	0.95	0.931	0.91	0.942	0.817	0.954	0.95	1.036	1.118	7070.2	6713.5	6582	6434.6	6659.3	5773.3	6747	6716.5	7322.4	7902.9	1.02	0.122794	0.857	-0.234	0.706756	0.997
P08240	SRPRA	Signal recognition particle receptor subunit alpha OS=Homo sapiens OX=9606 GN=SRPRA PE=1 SV=2	17	10	16	10	69.8	0.798	0.956	0.957	0.927	0.921	0.996	1.096	1.262	1.047	2651.3	2116.7	2534.7	2537.6	2457.4	2441.2	2639.7	2904.7	3346.5	2774.7	2.28	0.00797467	0.298	0.446	0.534087	0.997
P08243	ASNS	Asparagine synthetase [glutamine-hydrolyzing] OS=Homo sapiens OX=9606 GN=ASNS PE=1 SV=4	39	19	38	19	64.3	1.321	0.915	0.854	1.15	0.822	1.116	0.991	0.931	0.545	7343.6	9702.1	6716.1	6274	8447.2	6034.7	8194.9	7277.2	6835.3	3998.8	-1.35	0.320936	0.932	0.411	0.758026	0.997
P08247	SYP	Synaptophysin OS=Homo sapiens OX=9606 GN=SYP PE=1 SV=3	4	1	1	1	33.8	0.909	1.797	1.601	0.604	0.794	1.033	1.565	1.015	1.9	51.1	46.5	91.8	81.8	30.9	40.6	52.8	80	51.9	97.1	0.467	0.756606	0.965	-3.4	0.0425851	0.983
P08397	HMBS	Porphobilinogen deaminase OS=Homo sapiens OX=9606 GN=HMBS PE=1 SV=2	19	6	6	6	39.3	1.044	0.97	1.006	0.958	1.081	0.917	0.995	1.089	1.056	1399.6	1461.6	1357.7	1408.2	1340.7	1513.1	1282.7	1392.3	1524.1	1478.3	0.329	0.618393	0.959	-0.258	0.69523	0.997
P08559	PDHA1	Pyruvate dehydrogenase E1 component subunit alpha, somatic form, mitochondrial OS=Homo sapiens OX=9606 GN=PDHA1 PE=1 SV=3	23	9	14	9	43.3	1.041	1.126	1.09	0.959	1.06	0.992	0.998	1.023	1.045	1850.9	1926.4	2084.7	2018.3	1775.7	1962.8	1835.5	1846.9	1893.2	1934.2	-0.757	0.188176	0.898	-0.797	0.168064	0.993
P08574	CYC1	Cytochrome c1, heme protein, mitochondrial OS=Homo sapiens OX=9606 GN=CYC1 PE=1 SV=3	18	5	8	5	35.4	0.999	1.211	0.934	0.964	0.986	0.955	0.95	0.963	1.028	1048.9	1048.1	1270.4	979.5	1011.1	1033.8	1001.2	996.8	1010.6	1078.6	-0.708	0.326621	0.933	-0.674	0.349802	0.996
P08579	SNRPB2	U2 small nuclear ribonucleoprotein B'' OS=Homo sapiens OX=9606 GN=SNRPB2 PE=1 SV=1	23	5	7	3	25.5	1.027	0.941	0.891	1.128	0.992	1.049	0.98	0.982	0.839	650.6	668	612.6	579.7	733.7	645.2	682.7	637.4	639.1	545.7	-0.239	0.731987	0.964	1.28	0.0887877	0.99
P08670	VIM	Vimentin OS=Homo sapiens OX=9606 GN=VIM PE=1 SV=4	48	21	32	19	53.6	0.439	0.524	2.694	0.346	0.514	0.319	0.364	1.351	0.716	4090.2	1795.3	2142.7	11017.8	1416.5	2100.9	1304.8	1490.3	5527.2	2926.9	-0.575	0.790213	0.966	-3.05	0.177623	0.994
P08697	SERPINF2	Alpha-2-antiplasmin OS=Homo sapiens OX=9606 GN=SERPINF2 PE=1 SV=3	2	1	1	1	54.5	1.119	0.776	1.621	1.017	0.824	0.831	0.548	0.743	0.785	184.8	206.7	143.4	299.4	187.8	152.2	153.6	101.2	137.3	145.1	-3.44	0.0149855	0.401	-2.04	0.113834	0.991
P08708	RPS17	40S ribosomal protein S17 OS=Homo sapiens OX=9606 GN=RPS17 PE=1 SV=2	39	4	8	4	15.5	1.073	0.976	0.994	1.04	1.06	1.028	0.984	1.02	1	2267.2	2432.5	2212.2	2254.4	2357.1	2403.6	2329.8	2231	2311.9	2268.2	-0.271	0.615109	0.959	0.481	0.378361	0.996
P08727	KRT19	Keratin, type I cytoskeletal 19 OS=Homo sapiens OX=9606 GN=KRT19 PE=1 SV=4	60	22	53	15	44.1	1.184	4.688	0.378	1.813	1.886	1.817	1.209	0.303	0.326	2613.5	3094.8	12252.6	987.9	4737.8	4930.1	4748.3	3160.4	792.4	853	-3.06	0.178076	0.893	2.59	0.247976	0.995
P08729	KRT7	Keratin, type II cytoskeletal 7 OS=Homo sapiens OX=9606 GN=KRT7 PE=1 SV=5	30	13	23	9	51.4	0.574	2.539	0.688	1.124	0.568	0.92	0.776	1.423	1.191	1648.8	947.2	4186.1	1135.2	1853.7	936.7	1517.5	1279	2345.9	1963	1.06	0.614159	0.959	-0.437	0.834483	0.998
P08758	ANXA5	Annexin A5 OS=Homo sapiens OX=9606 GN=ANXA5 PE=1 SV=2	39	12	26	12	35.9	1.067	0.902	0.777	1.122	1.192	1.159	1.067	0.853	0.764	2949.8	3147.7	2660.1	2291.1	3308.2	3516.9	3419.5	3147.4	2516.3	2252.6	-0.189	0.844304	0.968	2.49	0.0238003	0.974
P08779	KRT16	Keratin, type I cytoskeletal 16 OS=Homo sapiens OX=9606 GN=KRT16 PE=1 SV=4	38	16	27	7	51.2	1.517	0.544	1.022	1.138	0.667	1.851	0.732	1.225	1.258	524.7	795.7	285.4	536.1	597.3	350.2	970.9	384.2	642.6	660.1	0.251	0.900646	0.969	0.803	0.690362	0.997
P08865	RPSA	40S ribosomal protein SA OS=Homo sapiens OX=9606 GN=RPSA PE=1 SV=4	42	8	26	8	32.8	1.052	0.979	0.975	0.941	0.94	0.969	0.905	0.94	0.92	3971.2	4178	3886.7	3870.3	3735.1	3732.5	3846.4	3593.3	3732.9	3651.6	-1.06	0.0674914	0.772	-0.633	0.249593	0.995
P08962	CD63	CD63 antigen OS=Homo sapiens OX=9606 GN=CD63 PE=1 SV=2	3	1	1	1	25.6	0.602	0.803	0.904	0.853	0.688	0.93	0.722	1.256	1.393	478.6	288.2	384.2	432.4	408.1	329.2	445.1	345.6	601.1	666.4	2.64	0.053783	0.73	0.255	0.837032	0.998
P09001	MRPL3	39S ribosomal protein L3, mitochondrial OS=Homo sapiens OX=9606 GN=MRPL3 PE=1 SV=1	11	4	5	4	38.6	0.957	1.105	1.058	1.029	1.068	1.016	1.046	1.045	1.077	759.5	726.4	839.3	803.5	781.8	811.1	771.4	794.1	793.3	817.8	0.197	0.73259	0.964	0.227	0.69342	0.997
P09012	SNRPA	U1 small nuclear ribonucleoprotein A OS=Homo sapiens OX=9606 GN=SNRPA PE=1 SV=3	39	9	14	7	31.3	0.967	0.986	1.018	0.982	0.991	0.978	1.008	1.057	1.022	832.9	805.2	821.6	848.2	817.7	825	814.5	839.7	880.5	851.1	0.396	0.425249	0.945	0.00806	0.986837	0.998
P09104	ENO2	Gamma-enolase OS=Homo sapiens OX=9606 GN=ENO2 PE=1 SV=3	24	8	22	7	47.2	1.236	1.183	1.278	0.942	1.224	0.912	0.901	0.991	0.645	1862.8	2302.1	2204	2380.2	1754.3	2279.8	1699.2	1677.6	1846.4	1202.1	-3.36	0.00360473	0.159	-1.9	0.059021	0.987
P09105	HBQ1	Hemoglobin subunit theta-1 OS=Homo sapiens OX=9606 GN=HBQ1 PE=1 SV=2	6	1	3	1	15.5	0.717	0.808	1.134	0.699	0.742	0.665	0.584	1.32	1.822	237.5	170.3	191.9	269.4	166.1	176.2	157.9	138.6	313.5	432.8	1.91	0.246425	0.917	-1.63	0.31935	0.996
P09110	ACAA1	3-ketoacyl-CoA thiolase, peroxisomal OS=Homo sapiens OX=9606 GN=ACAA1 PE=1 SV=2	19	5	5	5	44.3	0.889	1.15	1.272	0.922	1.081	0.87	0.92	1.061	1.188	427.2	379.7	491.5	543.3	393.7	461.9	371.7	392.9	453.3	507.4	-0.395	0.713368	0.963	-1.22	0.268153	0.995
P09132	SRP19	Signal recognition particle 19 kDa protein OS=Homo sapiens OX=9606 GN=SRP19 PE=1 SV=3	24	3	5	3	16.1	0.981	1.152	0.963	1.036	1.068	1.015	0.971	0.953	0.9	1421.3	1394.2	1637.2	1369	1472.4	1518	1442	1380.5	1354.9	1279.2	-0.966	0.15029	0.878	0.396	0.537651	0.997
P09211	GSTP1	Glutathione S-transferase P OS=Homo sapiens OX=9606 GN=GSTP1 PE=1 SV=2	9	1	1	1	23.3	0.979	0.785	1.006	0.803	0.936	1.103	1.056	0.695	0.661	41	40.1	32.2	41.2	32.9	38.4	45.2	43.3	28.5	27.1	-0.7	0.549057	0.955	0.206	0.858504	0.998
P09327	VIL1	Villin-1 OS=Homo sapiens OX=9606 GN=VIL1 PE=1 SV=4	20	16	17	16	92.6	1.742	1.748	0.886	1.378	1.551	1.146	0.946	0.301	0.571	1702.2	2966.1	2976.3	1508.7	2345.6	2640.1	1950.3	1610.4	511.9	971.8	-4.37	0.0071131	0.276	0.686	0.609343	0.997
P09382	LGALS1	Galectin-1 OS=Homo sapiens OX=9606 GN=LGALS1 PE=1 SV=2	57	7	19	7	14.7	0.884	1.03	1.358	0.837	0.717	0.73	0.889	1.127	1.128	5448.7	4818.8	5610.9	7401.3	4562.8	3906.6	3978.7	4846.1	6141.9	6148.2	-0.187	0.854715	0.968	-2.77	0.019174	0.969
P09417	QDPR	Dihydropteridine reductase OS=Homo sapiens OX=9606 GN=QDPR PE=1 SV=2	7	1	1	1	25.8	0.911	1.13	1.523	1.004	1.37	0.857	0.744	0.88	1.025	83	75.6	93.7	126.4	83.3	113.7	71.1	61.7	73.1	85	-2.35	0.0941462	0.824	-0.634	0.62918	0.997
P09429	HMGB1	High mobility group protein B1 OS=Homo sapiens OX=9606 GN=HMGB1 PE=1 SV=3	21	4	7	3	24.9	1.022	0.686	0.814	1.085	0.69	1.185	1.206	0.983	0.996	2452.1	2506.2	1681.2	1996.4	2659.8	1692.4	2906.4	2956.5	2411.6	2442.3	1.79	0.180038	0.894	1.48	0.261643	0.995
P09493	TPM1	Tropomyosin alpha-1 chain OS=Homo sapiens OX=9606 GN=TPM1 PE=1 SV=2	13	4	6	1	32.7	0.699	1.169	0.925	0.943	0.563	1.038	1.198	1.126	1.177	263.5	184.2	308	243.8	248.6	148.2	273.5	315.7	296.5	310.1	2.23	0.0775088	0.795	-0.391	0.737974	0.997
P09496	CLTA	Clathrin light chain A OS=Homo sapiens OX=9606 GN=CLTA PE=1 SV=1	13	4	7	4	27.1	0.997	0.988	0.882	1.022	0.979	1.051	0.987	0.899	0.994	1955.4	1950.4	1932.6	1725.6	1997.9	1914.2	2054.8	1929.4	1758.1	1944	-0.0674	0.914801	0.97	0.82	0.210966	0.994
P09497	CLTB	Clathrin light chain B OS=Homo sapiens OX=9606 GN=CLTB PE=1 SV=1	25	7	11	7	25.2	0.967	1.126	1.146	0.941	0.891	0.94	0.993	1.058	1.005	1974.2	1908.3	2222.6	2262.2	1856.8	1758.2	1856.3	1959.8	2089.1	1983.6	-0.605	0.34182	0.935	-1.64	0.021743	0.972
P09525	ANXA4	Annexin A4 OS=Homo sapiens OX=9606 GN=ANXA4 PE=1 SV=4	33	11	14	11	35.9	1.079	0.851	0.947	0.974	1.074	0.987	1.092	0.909	1.031	2252.5	2429.5	1918	2132.5	2193.9	2419.9	2223.2	2460.3	2046.8	2321.6	0.42	0.62244	0.959	0.583	0.496911	0.997
P09543	CNP	2',3'-cyclic-nucleotide 3'-phosphodiesterase OS=Homo sapiens OX=9606 GN=CNP PE=1 SV=2	14	7	9	6	47.5	1.058	1.096	0.951	1.073	1.152	1.093	1.089	0.937	1.174	1370.7	1450.2	1502.6	1303	1470.4	1579.3	1498.8	1492.1	1284.6	1608.9	0.175	0.817982	0.967	0.95	0.228047	0.995
P09622	DLD	Dihydrolipoyl dehydrogenase, mitochondrial OS=Homo sapiens OX=9606 GN=DLD PE=1 SV=2	26	12	28	12	54.1	1.013	1.244	1.019	1.033	1.114	1.044	0.987	0.884	0.9	5794.3	5871.4	7207.7	5906.2	5986.6	6454.3	6050.8	5717.4	5119.8	5217	-1.67	0.0307472	0.597	0.104	0.879172	0.998
P09651	HNRNPA1	Heterogeneous nuclear ribonucleoprotein A1 OS=Homo sapiens OX=9606 GN=HNRNPA1 PE=1 SV=5	55	16	38	13	38.7	0.944	0.921	0.994	0.955	0.992	0.956	0.963	1.03	1.066	2221.3	2097	2044.9	2208.9	2122.4	2203.2	2124.3	2139.6	2288.5	2367.9	0.648	0.236236	0.914	0.205	0.698121	0.997
P09661	SNRPA1	U2 small nuclear ribonucleoprotein A' OS=Homo sapiens OX=9606 GN=SNRPA1 PE=1 SV=2	37	8	15	8	28.4	1.041	0.982	0.954	1.065	1.083	1.034	1.053	1.001	0.946	1461.1	1520.4	1434.5	1393.7	1556.2	1582.4	1510.5	1538.1	1462.9	1382.9	0.0371	0.951126	0.971	0.951	0.137778	0.992
P09669	COX6C	Cytochrome c oxidase subunit 6C OS=Homo sapiens OX=9606 GN=COX6C PE=1 SV=2	33	4	7	4	8.8	1.226	0.896	1.115	1.079	0.903	0.98	1.165	0.879	0.933	2260.5	2772.3	2024.8	2520.7	2438.8	2042	2215.7	2632.5	1986.7	2108	-0.912	0.413661	0.944	-0.791	0.476883	0.996
P09758	TACSTD2	Tumor-associated calcium signal transducer 2 OS=Homo sapiens OX=9606 GN=TACSTD2 PE=1 SV=3	5	1	1	1	35.7	1.322	1.243	0.74	1.86	1.897	1.337	1.232	0.476	0.515	33.5	44.2	41.6	24.8	62.2	63.5	44.7	41.2	15.9	17.2	-2.11	0.211364	0.906	2.84	0.102307	0.991
P09874	PARP1	Poly [ADP-ribose] polymerase 1 OS=Homo sapiens OX=9606 GN=PARP1 PE=1 SV=4	39	33	75	33	113	1.157	1.076	1.013	0.977	0.887	0.942	1.184	0.966	1.001	11308.8	13082.8	12167	11456.9	11054	10034	10649.2	13384.1	10919.4	11323.7	-0.47	0.553408	0.955	-1.61	0.0622248	0.987
P09884	POLA1	DNA polymerase alpha catalytic subunit OS=Homo sapiens OX=9606 GN=POLA1 PE=1 SV=2	14	15	17	15	165.8	1.143	0.814	0.809	1.138	1.076	1.112	1.072	0.953	0.88	1439.3	1644.9	1171.8	1165	1638.5	1548.8	1600.2	1543.4	1372.3	1266.2	0.313	0.752021	0.965	2.03	0.0614626	0.987
P09960	LTA4H	Leukotriene A-4 hydrolase OS=Homo sapiens OX=9606 GN=LTA4H PE=1 SV=2	30	15	25	15	69.2	0.937	0.983	1.191	0.841	0.948	0.907	0.924	1.093	1.138	3849.1	3606.6	3782	4585.9	3239	3647.9	3493	3556.6	4207.1	4379.5	0.114	0.890417	0.969	-1.42	0.10837	0.991
P09972	ALDOC	Fructose-bisphosphate aldolase C OS=Homo sapiens OX=9606 GN=ALDOC PE=1 SV=2	46	13	31	10	39.4	1.271	0.66	1.311	0.818	1.478	1.014	1.19	0.861	0.755	2134.2	2711.5	1409.2	2798.8	1745.7	3154	2163.9	2540.7	1837.7	1611	-1.31	0.451682	0.948	-0.254	0.882374	0.998
P0C2W1	FBXO45	F-box/SPRY domain-containing protein 1 OS=Homo sapiens OX=9606 GN=FBXO45 PE=1 SV=1	7	2	2	2	30.6	0.983	0.862	1.053	1.048	0.927	0.971	0.942	1.043	0.99	146.7	144.3	126.4	154.5	153.7	136	142.4	138.2	153	145.2	0.115	0.867127	0.968	0.212	0.757304	0.997
P0C7P1	RBMY1D	RNA-binding motif protein, Y chromosome, family 1 member D OS=Homo sapiens OX=9606 GN=RBMY1D PE=2 SV=1	16	7	9	6	55.7	0.971	1.092	1.153	0.978	0.955	0.895	0.813	0.968	1.089	1106.1	1073.5	1208	1275.7	1081.4	1056.5	990	899.1	1071.1	1204	-1.31	0.118773	0.853	-1.35	0.109805	0.991
P0CG13	CHTF8	Chromosome transmission fidelity protein 8 homolog OS=Homo sapiens OX=9606 GN=CHTF8 PE=1 SV=1	7	1	1	1	13.3	0.851	0.883	1.108	1.01	0.789	1.052	1.042	1.008	0.865	25	21.3	22.1	27.7	25.3	19.7	26.3	26.1	25.2	21.7	0.319	0.751325	0.965	0.25	0.803287	0.997
P0DMV8	HSPA1A	Heat shock 70 kDa protein 1A OS=Homo sapiens OX=9606 GN=HSPA1A PE=1 SV=1	37	22	95	17	70	1.038	1.156	0.962	1.189	1.227	1.186	1.117	0.927	0.677	10574.8	10979.2	12223.2	10172.5	12574.4	12978.8	12544.9	11807.6	9807.8	7164.3	-1.16	0.240609	0.915	1.57	0.121226	0.992
P0DN79	CBSL	Cystathionine beta-synthase-like protein OS=Homo sapiens OX=9606 GN=CBSL PE=1 SV=1	13	8	11	8	60.5	0.873	0.805	0.913	0.88	0.887	0.906	0.914	1.143	1.09	2338.7	2041.7	1881.8	2136	2058.5	2074.5	2118.1	2136.5	2673.7	2549.8	1.77	0.0228348	0.513	0.139	0.837234	0.998
P0DOY2	IGLC2	Immunoglobulin lambda constant 2 OS=Homo sapiens OX=9606 GN=IGLC2 PE=1 SV=1	24	2	2	1	11.3	0.728	0.68	0.628	0.724	0.75	0.805	1.948	0.732	2.139	244.1	177.7	165.9	153.3	176.8	183.1	196.5	475.6	178.8	522.1	4.45	0.0113207	0.36	0.246	0.867712	0.998
P0DP23	CALM1	Calmodulin-1 OS=Homo sapiens OX=9606 GN=CALM1 PE=1 SV=1	21	2	4	2	16.8	0.815	0.737	0.832	0.895	0.924	1.016	0.931	0.834	1.206	582.3	474.3	429	484.7	521.5	537.9	591.8	542.4	485.9	702.2	1.57	0.0949402	0.825	1.33	0.151002	0.993
P0DPB5	POLR1D.1	Protein POLR1D, isoform 2 OS=Homo sapiens OX=9606 GN=POLR1D PE=1 SV=1	6	1	1	1	14.3	0.944	0.881	1.045	0.93	0.766	0.778	0.982	1.064	0.831	73.1	69	64.4	76.4	67.9	56	56.8	71.8	77.7	60.7	0.0852	0.910192	0.97	-1.3	0.108572	0.991
P0DPB6	POLR1D	DNA-directed RNA polymerases I and III subunit RPAC2 OS=Homo sapiens OX=9606 GN=POLR1D PE=1 SV=1	24	3	3	3	15.2	1.07	0.974	0.902	0.871	1.114	1.046	0.908	0.877	0.966	167.5	179.3	163.1	151	145.9	186.6	175.2	152.2	146.9	161.9	-0.896	0.312043	0.931	0.349	0.687282	0.997
P10109	FDX1	Adrenodoxin, mitochondrial OS=Homo sapiens OX=9606 GN=FDX1 PE=1 SV=1	14	3	6	3	19.4	0.992	1.396	1.091	0.964	1.094	0.928	0.919	1.128	1.26	341.3	338.5	476.4	372.4	329.1	373.6	316.7	313.5	384.9	429.9	-0.446	0.646753	0.96	-1.19	0.236719	0.995
P10155	RO60	60 kDa SS-A/Ro ribonucleoprotein OS=Homo sapiens OX=9606 GN=RO60 PE=1 SV=2	27	13	23	13	60.6	1.124	0.966	0.991	0.949	0.902	0.925	1.097	0.989	1.139	5127.3	5764.3	4952.7	5081.2	4865.8	4627.2	4742.8	5623.3	5069.3	5841.4	0.393	0.571885	0.956	-1.2	0.104194	0.991
P10253	GAA	Lysosomal alpha-glucosidase OS=Homo sapiens OX=9606 GN=GAA PE=1 SV=4	8	6	9	6	105.3	1.033	1.207	1.225	0.814	0.928	0.774	0.927	0.986	1.321	277.9	287.2	335.4	340.4	226.3	257.8	215.1	257.5	273.9	367.1	-1.09	0.224748	0.911	-3.09	0.00423903	0.882
P10275	AR	Androgen receptor OS=Homo sapiens OX=9606 GN=AR PE=1 SV=3	14	10	13	10	99.1	0.961	1.023	0.904	1.08	1.061	1.021	1.119	1.106	1.053	1285.8	1236	1315.7	1162.8	1388.4	1363.6	1312.9	1439.2	1422.4	1353.3	1.41	0.0336698	0.621	1.26	0.0535284	0.986
P10398	ARAF	Serine/threonine-protein kinase A-Raf OS=Homo sapiens OX=9606 GN=ARAF PE=1 SV=2	12	7	8	4	67.5	1.134	1.095	1.114	1.119	1.04	1.031	1.122	1.091	1.138	455.5	516.6	498.7	507.4	509.9	473.9	469.7	511.2	497.1	518.4	-0.0424	0.936295	0.97	-0.318	0.551882	0.997
P10412	H1-4	Histone H1.4 OS=Homo sapiens OX=9606 GN=H1-4 PE=1 SV=2	37	8	22	5	21.9	0.913	0.637	0.826	1.096	0.909	1.014	1.134	1.118	1.222	2658.8	2427.7	1693	2196.6	2914	2416.8	2695	3014.9	2971.4	3249.5	3.29	0.000732805	0.0205	2.01	0.0154485	0.963
P10515	DLAT	Dihydrolipoyllysine-residue acetyltransferase component of pyruvate dehydrogenase complex, mitochondrial OS=Homo sapiens OX=9606 GN=DLAT PE=1 SV=3	21	11	25	11	69	1.081	1.061	0.928	0.993	1.075	1.038	0.984	0.931	0.929	4590.9	4963.4	4871.5	4261.9	4556.5	4937.3	4764.9	4519.4	4273	4263.2	-0.943	0.17611	0.892	0.27	0.685223	0.997
P10586	PTPRF	Receptor-type tyrosine-protein phosphatase F OS=Homo sapiens OX=9606 GN=PTPRF PE=1 SV=2	10	13	13	13	212.7	0.796	1.124	1.126	0.829	0.937	0.797	0.787	1.178	1.409	1380.3	1098.4	1551.2	1553.5	1144	1293	1099.5	1086.9	1625.4	1944.8	0.526	0.683229	0.962	-1.7	0.203846	0.994
P10599	TXN	Thioredoxin OS=Homo sapiens OX=9606 GN=TXN PE=1 SV=3	50	5	10	5	11.7	1.138	1.035	0.993	1.088	1.023	1.12	1.016	0.824	0.835	2720.3	3095.5	2814.4	2700.9	2958.4	2781.7	3046.8	2762.9	2241.3	2270.9	-1.66	0.049311	0.711	0.433	0.574017	0.997
P10606	COX5B	Cytochrome c oxidase subunit 5B, mitochondrial OS=Homo sapiens OX=9606 GN=COX5B PE=1 SV=2	45	5	9	5	13.7	1.003	0.893	1.101	0.957	0.945	0.921	0.959	0.978	0.942	1041.2	1044.1	929.4	1146.3	996.9	983.8	959	998.5	1018.2	980.3	-0.578	0.35963	0.938	-0.715	0.26269	0.995
P10619	CTSA	Lysosomal protective protein OS=Homo sapiens OX=9606 GN=CTSA PE=1 SV=2	11	5	5	5	54.4	1.039	1.197	1.021	0.989	1.039	1.049	1.132	1.106	1.089	407.1	423	487.5	415.6	402.5	423.1	427.1	460.9	450.1	443.1	0.299	0.625477	0.959	-0.384	0.532272	0.997
P10620	MGST1	Microsomal glutathione S-transferase 1 OS=Homo sapiens OX=9606 GN=MGST1 PE=1 SV=1	19	2	2	2	17.6	0.637	0.755	1.3	0.674	0.602	0.626	0.586	1.434	1.322	375.6	239.4	283.4	488.4	253	226	235	220	538.5	496.3	1.51	0.373645	0.94	-2.03	0.238384	0.995
P10636	MAPT	Microtubule-associated protein tau OS=Homo sapiens OX=9606 GN=MAPT PE=1 SV=5	3	2	2	2	78.9	1.03	1.596	1.003	0.781	1.125	0.902	0.996	1.119	1.188	139.5	143.7	222.7	140	109	156.9	125.8	138.9	156.1	165.8	-0.291	0.791409	0.966	-1.83	0.117731	0.992
P10644	PRKAR1A	cAMP-dependent protein kinase type I-alpha regulatory subunit OS=Homo sapiens OX=9606 GN=PRKAR1A PE=1 SV=1	21	7	11	7	43	1.016	1.147	1.146	0.889	0.987	0.766	0.785	1.1	1.025	1270.6	1290.4	1457.9	1456.3	1129.5	1254.4	973.8	997.5	1398.1	1303	-1.4	0.14166	0.872	-2.27	0.0268529	0.976
P10746	UROS	Uroporphyrinogen-III synthase OS=Homo sapiens OX=9606 GN=UROS PE=1 SV=1	15	2	2	2	28.6	0.995	1.034	0.983	0.873	1.114	0.905	0.858	0.974	1.172	219.3	218.2	226.8	215.6	191.4	244.3	198.5	188.2	213.6	257.1	-0.292	0.757831	0.965	-0.462	0.626861	0.997
P10768	ESD	S-formylglutathione hydrolase OS=Homo sapiens OX=9606 GN=ESD PE=1 SV=2	17	5	10	5	31.4	1.006	1.06	1.036	0.953	1.013	0.926	0.932	1.018	1.001	2066.6	2078.2	2189.7	2140.4	1969.3	2093.9	1913.9	1926	2103.6	2067.8	-0.705	0.219041	0.909	-0.783	0.175645	0.994
P10809	HSPD1	60 kDa heat shock protein, mitochondrial OS=Homo sapiens OX=9606 GN=HSPD1 PE=1 SV=2	61	26	124	26	61	1.084	1.13	0.988	0.97	1.091	0.997	1.036	0.916	0.961	23994.2	26000.1	27102.2	23705.7	23265.2	26188.1	23910.7	24851.2	21981.4	23066.4	-1.09	0.150186	0.878	-0.407	0.572478	0.997
P10909	CLU	Clusterin OS=Homo sapiens OX=9606 GN=CLU PE=1 SV=1	16	6	7	6	52.5	1.264	1.938	0.636	1.614	1.258	1.505	0.982	0.37	0.455	1266.2	1600.4	2454.1	804.8	2043.7	1592.6	1905.6	1243.4	468.3	576.7	-3.42	0.046249	0.698	1.93	0.229119	0.995
P11021	HSPA5	Endoplasmic reticulum chaperone BiP OS=Homo sapiens OX=9606 GN=HSPA5 PE=1 SV=2	49	27	100	24	72.3	0.916	0.873	1.072	0.975	1.052	0.781	0.917	1.181	0.939	16507.6	15117.1	14409.8	17691.4	16102	17364	12894.5	15133.3	19491.3	15502.1	0.463	0.643189	0.96	-0.0579	0.953521	0.998
P11047	LAMC1	Laminin subunit gamma-1 OS=Homo sapiens OX=9606 GN=LAMC1 PE=1 SV=3	3	5	5	5	177.5	0.931	1.188	1.008	0.934	0.886	0.847	1.359	1.19	1.737	493.9	459.9	586.9	497.8	461.5	437.4	418.2	671.3	588	857.8	2.36	0.00893408	0.319	-1.56	0.0588622	0.987
P11117	ACP2	Lysosomal acid phosphatase OS=Homo sapiens OX=9606 GN=ACP2 PE=1 SV=3	3	1	1	1	48.3	0.806	1.339	1.358	1.122	1.002	1.085	0.926	1.935	1.196	27.3	22	36.5	37	30.6	27.3	29.6	25.2	52.8	32.6	0.552	0.699232	0.963	-0.0132	0.992621	0.998
P11137	MAP2	Microtubule-associated protein 2 OS=Homo sapiens OX=9606 GN=MAP2 PE=1 SV=4	1	2	2	2	199.4	0.538	1.084	1.808	0.583	0.523	0.675	0.725	1.36	1.121	608.4	327.4	659.4	1099.9	354.7	318.4	410.9	441.2	827.2	682.3	-0.0992	0.953058	0.971	-3.49	0.0595488	0.987
P11142	HSPA8	Heat shock cognate 71 kDa protein OS=Homo sapiens OX=9606 GN=HSPA8 PE=1 SV=1	54	27	143	17	70.9	0.968	1.033	1.047	0.861	0.912	0.875	0.938	1.049	1.057	13120.9	12706	13550.5	13740.5	11292.4	11967.5	11483.1	12303.1	13758	13872.8	-0.133	0.816407	0.967	-1.53	0.0206839	0.971
P11171	EPB41	Protein 4.1 OS=Homo sapiens OX=9606 GN=EPB41 PE=1 SV=4	8	6	8	6	97	0.995	1.087	1.134	0.956	1.004	0.952	1.038	1.077	1.197	1184.6	1179.2	1287.4	1343.7	1132.9	1189.6	1127.6	1230.2	1275.5	1418	0.237	0.684123	0.962	-1.05	0.0942352	0.99
P11172	UMPS	Uridine 5'-monophosphate synthase OS=Homo sapiens OX=9606 GN=UMPS PE=1 SV=1	21	10	14	10	52.2	1.003	1.011	1.006	1.026	1.075	1.054	1.79	0.99	1.392	2544.7	2551.5	2572.4	2561.2	2610.2	2736.1	2682.8	4555.1	2519.5	3543.1	1.94	0.0592175	0.748	0.691	0.465986	0.996
P11177	PDHB	Pyruvate dehydrogenase E1 component subunit beta, mitochondrial OS=Homo sapiens OX=9606 GN=PDHB PE=1 SV=3	26	8	15	8	39.2	1.025	1.113	1.063	0.9	1.003	0.92	0.904	0.916	1.042	4647.6	4764	5175	4940.5	4180.7	4662.7	4276	4201.9	4256.6	4843.9	-1.41	0.0457526	0.695	-1.41	0.0457594	0.984
P11182	DBT	Lipoamide acyltransferase component of branched-chain alpha-keto acid dehydrogenase complex, mitochondrial OS=Homo sapiens OX=9606 GN=DBT PE=1 SV=3	28	12	13	12	53.5	1.015	1.142	1.011	1.08	1.096	1.069	1.106	0.983	1.028	1711.3	1737.3	1953.7	1730.7	1848.7	1874.8	1829.5	1893.5	1682.1	1759.5	-0.192	0.763612	0.965	0.566	0.383857	0.996
P11216	PYGB	Glycogen phosphorylase, brain form OS=Homo sapiens OX=9606 GN=PYGB PE=1 SV=5	10	7	8	6	96.6	1.124	1.232	0.89	1.202	0.911	1.022	1.452	0.842	0.894	769.9	865	948.4	684.8	925.6	701.1	787.1	1117.6	648.6	688	-0.641	0.6502	0.96	-0.179	0.898837	0.998
P11233	RALA	Ras-related protein Ral-A OS=Homo sapiens OX=9606 GN=RALA PE=1 SV=1	9	2	5	2	23.6	1.107	1.137	1.081	0.946	1.123	0.976	1.044	1.028	0.835	1467.4	1623.9	1667.7	1585.9	1388	1648.6	1432.1	1532.1	1508.1	1224.7	-1.4	0.0973578	0.829	-0.966	0.235248	0.995
P11274	BCR	Breakpoint cluster region protein OS=Homo sapiens OX=9606 GN=BCR PE=1 SV=2	1	2	2	2	142.7	0.966	0.84	0.894	1.064	0.569	0.979	0.963	1.138	1.126	80.9	78.2	68	72.4	86.1	46.1	79.2	77.9	92.1	91.1	1.7	0.108616	0.843	0.297	0.764145	0.997
P11279	LAMP1	Lysosome-associated membrane glycoprotein 1 OS=Homo sapiens OX=9606 GN=LAMP1 PE=1 SV=3	9	4	6	4	44.9	0.908	1.2	0.975	0.965	1.008	1.25	1.048	0.938	0.907	1360.9	1236.3	1633.4	1326.8	1313.4	1371.9	1700.7	1426.1	1276.5	1234.1	-0.489	0.622932	0.959	0.625	0.5313	0.997
P11310	ACADM	Medium-chain specific acyl-CoA dehydrogenase, mitochondrial OS=Homo sapiens OX=9606 GN=ACADM PE=1 SV=1	34	12	20	12	46.6	0.88	1.484	1.069	0.942	1.148	0.884	0.95	1.079	1.038	2037.5	1792.9	3023.8	2178.8	1918.7	2340	1801.6	1935.5	2197.7	2114.8	-0.592	0.600278	0.958	-0.872	0.444214	0.996
P11388	TOP2A	DNA topoisomerase 2-alpha OS=Homo sapiens OX=9606 GN=TOP2A PE=1 SV=3	3	4	4	1	174.3	1.059	0.511	0.601	1.505	0.625	1.323	1.036	0.988	0.724	139	147.3	71.1	83.6	209.2	86.9	183.9	144.1	137.3	100.7	1.03	0.539554	0.954	2.73	0.123176	0.992
P11413	G6PD	Glucose-6-phosphate 1-dehydrogenase OS=Homo sapiens OX=9606 GN=G6PD PE=1 SV=4	22	8	10	8	59.2	0.834	0.892	1.125	0.862	0.865	0.788	0.877	1.074	1.232	1132.2	944.4	1009.5	1273.2	976.4	979	892	992.9	1215.7	1394.8	0.888	0.371324	0.939	-1.2	0.233785	0.995
P11441	UBL4A	Ubiquitin-like protein 4A OS=Homo sapiens OX=9606 GN=UBL4A PE=1 SV=1	19	3	3	3	17.8	0.973	1.004	1.079	0.937	1.015	1.032	0.932	1.01	1.006	596.3	580.3	598.8	643.1	558.6	605.2	615.2	555.7	602.5	599.8	-0.527	0.397795	0.942	-0.169	0.782341	0.997
P11474	ESRRA	Steroid hormone receptor ERR1 OS=Homo sapiens OX=9606 GN=ESRRA PE=1 SV=3	4	2	2	2	45.5	0.961	0.821	0.904	0.964	0.987	0.981	1.066	1.019	0.896	464.1	445.9	381	419.4	447.4	458.1	455.5	494.9	473	416.1	1.04	0.137896	0.869	0.874	0.205342	0.994
P11498	PC	Pyruvate carboxylase, mitochondrial OS=Homo sapiens OX=9606 GN=PC PE=1 SV=2	19	18	18	18	129.6	0.94	1.125	0.94	0.918	1.093	0.916	1.006	1.16	1.16	2623.2	2464.6	2951.6	2467	2407.9	2866.8	2401.5	2638.4	3044.2	3042.2	1.1	0.205973	0.905	-0.19	0.819892	0.997
P11586	MTHFD1	C-1-tetrahydrofolate synthase, cytoplasmic OS=Homo sapiens OX=9606 GN=MTHFD1 PE=1 SV=3	38	32	64	31	101.5	0.992	1.014	0.978	0.947	1.033	0.951	0.968	1.055	0.952	9312.8	9237.8	9443.5	9107.6	8818	9624.2	8853.5	9013.5	9826.7	8866.9	-0.103	0.859869	0.968	-0.162	0.781061	0.997
P11717	IGF2R	Cation-independent mannose-6-phosphate receptor OS=Homo sapiens OX=9606 GN=IGF2R PE=1 SV=3	4	10	12	10	274.2	0.894	0.922	0.901	1.033	0.897	1.002	1.068	1.033	1.133	2088.4	1867.6	1926.1	1881.5	2158.2	1873.9	2091.9	2229.8	2158.2	2365.7	1.85	0.0108546	0.353	0.936	0.146712	0.993
P11766	ADH5	Alcohol dehydrogenase class-3 OS=Homo sapiens OX=9606 GN=ADH5 PE=1 SV=4	21	8	11	8	39.7	0.94	0.971	1.062	0.831	0.954	0.873	0.956	1.062	1.245	2542.4	2389.3	2467.8	2699.9	2113.7	2424.8	2219.1	2430.6	2700.2	3165.6	0.761	0.314496	0.931	-1.15	0.139314	0.993
P11802	CDK4	Cyclin-dependent kinase 4 OS=Homo sapiens OX=9606 GN=CDK4 PE=1 SV=2	20	4	5	4	33.7	0.985	1.128	1.125	0.959	0.942	0.918	0.816	0.944	1.17	922.6	908.8	1040.3	1038.1	884.6	869.4	846.5	753.2	870.8	1079.2	-1.27	0.152692	0.879	-1.49	0.0981294	0.991
P11908	PRPS2	Ribose-phosphate pyrophosphokinase 2 OS=Homo sapiens OX=9606 GN=PRPS2 PE=1 SV=2	25	7	8	4	34.7	0.919	0.868	0.95	0.955	1.017	1.037	0.965	0.99	0.829	888	816.3	770.5	843.2	848.1	903.5	920.6	857.1	878.7	736.3	0.204	0.740098	0.964	1.12	0.090982	0.99
P11940	PABPC1	Polyadenylate-binding protein 1 OS=Homo sapiens OX=9606 GN=PABPC1 PE=1 SV=2	45	23	52	18	70.6	1.109	1.045	1.027	0.978	0.969	0.964	0.996	1.045	1.007	6770.7	7510.1	7075.8	6950.8	6620.1	6558.7	6524.9	6740.7	7073.1	6816.3	-0.586	0.275555	0.924	-1	0.0768111	0.989
P12004	PCNA	Proliferating cell nuclear antigen OS=Homo sapiens OX=9606 GN=PCNA PE=1 SV=1	56	13	41	13	28.8	1.067	0.953	0.877	1.058	1.13	1.07	1.067	0.948	0.829	9628.2	10273.2	9177.9	8447.3	10183.7	10875.6	10298.4	10274.2	9126.4	7980.5	-0.173	0.832826	0.967	1.46	0.0977505	0.991
P12081	HARS1	Histidine--tRNA ligase, cytoplasmic OS=Homo sapiens OX=9606 GN=HARS1 PE=1 SV=2	24	13	21	9	57.4	1.008	1.098	1.115	0.908	1.01	0.887	0.923	1.03	1.059	3986.7	4018.9	4376.5	4445	3619	4024.6	3535	3678.2	4105	4222.7	-0.883	0.197836	0.901	-1.53	0.0380738	0.982
P12109	COL6A1	Collagen alpha-1(VI) chain OS=Homo sapiens OX=9606 GN=COL6A1 PE=1 SV=3	4	3	3	3	108.5	1.013	1.352	1.148	1.146	1.388	1.041	1.564	1.524	1.067	462.1	468.2	624.9	530.4	529.5	641.3	480.8	722.7	704	493.1	0.994	0.30914	0.93	0.405	0.671428	0.997
P12235	SLC25A4	ADP/ATP translocase 1 OS=Homo sapiens OX=9606 GN=SLC25A4 PE=1 SV=4	23	8	19	1	33	0.824	1.051	1.021	1.093	1.232	1.237	0.948	1.022	1.014	325.9	268.7	342.4	332.7	356.4	401.5	403	309.1	333	330.6	0.191	0.792803	0.966	2.29	0.00886317	0.94
P12236	SLC25A6	ADP/ATP translocase 3 OS=Homo sapiens OX=9606 GN=SLC25A6 PE=1 SV=4	33	11	28	1	32.8	0.857	1.078	1.065	0.843	0.93	0.954	0.796	1.145	1.219	625.3	536	674.3	665.9	527.3	581.6	596.5	497.8	715.7	762.5	0.351	0.745315	0.964	-0.996	0.365145	0.996
P12268	IMPDH2	Inosine-5'-monophosphate dehydrogenase 2 OS=Homo sapiens OX=9606 GN=IMPDH2 PE=1 SV=2	24	11	22	9	55.8	1.118	1.032	0.941	1.018	0.998	1.025	0.943	0.897	0.889	2101.5	2349.8	2169.6	1978	2139.8	2097.5	2154.7	1982.3	1884.5	1868.7	-1.42	0.044539	0.689	-0.0377	0.952796	0.998
P12270	TPR	Nucleoprotein TPR OS=Homo sapiens OX=9606 GN=TPR PE=1 SV=3	6	11	13	11	267.1	0.772	0.696	0.868	1.143	0.691	1.328	0.889	1.111	1.046	964.5	744.9	671.5	837.4	1102	666.5	1280.9	857.4	1071.8	1009.1	2.02	0.128125	0.862	2.61	0.0576842	0.987
P12273	PIP	Prolactin-inducible protein OS=Homo sapiens OX=9606 GN=PIP PE=1 SV=1	18	2	2	2	16.6	0.193	0.158	0.165	0.133	0.172	0.212	2.817	0.177	4.705	460.7	89.1	72.6	75.9	61.3	79	97.6	1297.8	81.6	2167.6	6.17	0.0118005	0.366	-0.196	0.924556	0.998
P12277	CKB	Creatine kinase B-type OS=Homo sapiens OX=9606 GN=CKB PE=1 SV=1	51	13	45	13	42.6	0.577	0.896	1.424	0.509	0.681	0.562	0.648	1.366	1.755	6684.3	3856.7	5989.8	9519.5	3399.5	4549.6	3756	4332	9134	11729	1.49	0.402682	0.943	-2.61	0.157435	0.993
P12429	ANXA3	Annexin A3 OS=Homo sapiens OX=9606 GN=ANXA3 PE=1 SV=3	3	1	1	1	36.4	1.425	1.375	0.914	1.714	0.839	1.053	1.815	0.667	1.316	211.8	301.8	291.1	193.6	363	177.8	223.1	384.3	141.2	278.7	-0.359	0.850209	0.968	-0.498	0.793532	0.997
P12532	CKMT1A	Creatine kinase U-type, mitochondrial OS=Homo sapiens OX=9606 GN=CKMT1A PE=1 SV=1	22	8	22	8	47	1.052	1.137	1.043	1.024	1.079	1.038	1.005	0.899	0.928	2977	3130.6	3383.6	3104.3	3048.6	3213.2	3089.1	2990.8	2676.5	2763.7	-1.5	0.0257907	0.548	-0.114	0.84646	0.998
P12694	BCKDHA	2-oxoisovalerate dehydrogenase subunit alpha, mitochondrial OS=Homo sapiens OX=9606 GN=BCKDHA PE=1 SV=2	19	7	11	7	50.4	0.813	1.02	1.125	0.913	0.955	0.871	0.887	1.008	0.995	611.3	497.1	623.3	687.9	558.1	583.7	532.4	542.3	616.1	608.1	-0.396	0.634647	0.96	-0.87	0.306754	0.995
P12755	SKI	Ski oncogene OS=Homo sapiens OX=9606 GN=SKI PE=1 SV=1	6	2	2	2	80	0.659	0.718	0.979	0.682	0.691	0.772	0.745	1.355	1.478	144.5	95.2	103.8	141.5	98.6	99.8	111.6	107.7	195.9	213.7	2.73	0.0533172	0.728	-0.753	0.559934	0.997
P12814	ACTN1	Alpha-actinin-1 OS=Homo sapiens OX=9606 GN=ACTN1 PE=1 SV=2	33	24	56	13	103	1.031	1.126	1.011	0.965	1.043	0.939	1.096	1.011	1.047	3312.3	3416	3731.1	3347.4	3195.5	3454.1	3111.7	3629.2	3348.3	3467	-0.0716	0.910458	0.97	-0.75	0.254387	0.995
P12821	ACE	Angiotensin-converting enzyme OS=Homo sapiens OX=9606 GN=ACE PE=1 SV=1	4	4	5	4	149.6	0.68	1.011	1.315	0.931	1.033	0.782	0.805	1.012	1.072	603.1	410.3	609.6	793.3	561.2	622.8	471.7	485.2	610.2	646.6	-0.445	0.726963	0.964	-0.786	0.539899	0.997
P12830	CDH1	Cadherin-1 OS=Homo sapiens OX=9606 GN=CDH1 PE=1 SV=3	13	10	11	10	97.4	0.832	0.91	0.91	1.158	1.047	1.187	0.999	1.017	0.886	1243.3	1034.1	1131.1	1131.3	1440.2	1301.8	1476	1242.5	1264.3	1101	0.904	0.175377	0.892	2.78	0.00113072	0.602
P12931	SRC	Proto-oncogene tyrosine-protein kinase Src OS=Homo sapiens OX=9606 GN=SRC PE=1 SV=3	11	4	4	3	59.8	0.729	1.144	1.48	0.588	0.768	0.693	0.766	0.993	1.819	179.3	130.8	205.1	265.4	105.5	137.7	124.3	137.4	178.2	326.2	-0.306	0.84696	0.968	-3.28	0.0595864	0.987
P12955	PEPD	Xaa-Pro dipeptidase OS=Homo sapiens OX=9606 GN=PEPD PE=1 SV=3	7	4	6	4	54.5	1.086	0.963	0.969	0.851	0.906	0.787	0.988	1.105	1.252	1125.2	1221.9	1083.2	1090	958	1019.6	885.9	1111.8	1243.1	1408.4	0.846	0.241265	0.916	-1.75	0.0272407	0.976
P12956	XRCC6	X-ray repair cross-complementing protein 6 OS=Homo sapiens OX=9606 GN=XRCC6 PE=1 SV=2	37	20	51	20	69.8	1.057	1.005	0.964	0.997	1.026	1.015	0.996	0.936	0.98	9195.5	9715.5	9242.5	8860.1	9172.1	9430	9335	9160.8	8611	9010.3	-0.549	0.343493	0.936	0.155	0.78456	0.997
P13010	XRCC5	X-ray repair cross-complementing protein 5 OS=Homo sapiens OX=9606 GN=XRCC5 PE=1 SV=3	27	18	48	18	82.7	1.05	1.013	0.984	0.989	1.037	1.01	1	0.949	0.967	11114.8	11668.8	11256.7	10940.1	10990.4	11529.5	11222.3	11112.1	10551.2	10744	-0.606	0.283195	0.925	0.0581	0.915595	0.998
P13051	UNG	Uracil-DNA glycosylase OS=Homo sapiens OX=9606 GN=UNG PE=1 SV=2	24	4	4	4	34.6	1.113	1.001	0.816	1.274	1.256	1.188	1.14	0.862	0.862	181.1	201.5	181.3	147.8	230.8	227.4	215.1	206.5	156.2	156.1	-0.32	0.756952	0.965	2.42	0.0365623	0.981
P13073	COX4I1	Cytochrome c oxidase subunit 4 isoform 1, mitochondrial OS=Homo sapiens OX=9606 GN=COX4I1 PE=1 SV=1	39	7	18	7	19.6	1.119	0.997	0.932	0.941	0.96	0.972	0.982	0.896	0.961	5163.4	5776.6	5148.1	4812.4	4857.9	4956.5	5020.4	5068.3	4628.4	4962.9	-0.874	0.21815	0.909	-0.669	0.338459	0.996
P13473	LAMP2	Lysosome-associated membrane glycoprotein 2 OS=Homo sapiens OX=9606 GN=LAMP2 PE=1 SV=2	2	1	1	1	44.9	0.853	1.257	1.095	0.758	0.863	1.138	1.049	0.846	0.826	50.6	43.1	63.6	55.4	38.3	43.7	57.5	53.1	42.8	41.8	-1.33	0.313935	0.931	-1.2	0.361665	0.996
P13489	RNH1	Ribonuclease inhibitor OS=Homo sapiens OX=9606 GN=RNH1 PE=1 SV=2	23	10	18	10	49.9	0.96	1.076	0.96	1.004	1.145	1.019	0.987	0.916	0.892	2517.1	2416.6	2708.6	2415.3	2526.1	2881.8	2565.1	2483.5	2305.9	2245	-0.731	0.288187	0.926	0.804	0.245672	0.995
P13639	EEF2	Elongation factor 2 OS=Homo sapiens OX=9606 GN=EEF2 PE=1 SV=4	35	28	93	27	95.3	0.978	0.983	1.044	0.906	0.939	0.896	0.905	1.046	1.023	15338.4	15008.6	15083.9	16020.3	13890.4	14404.1	13744.5	13887.5	16041.4	15693.5	-0.248	0.672337	0.961	-1.05	0.0943096	0.99
P13645	KRT10	Keratin, type I cytoskeletal 10 OS=Homo sapiens OX=9606 GN=KRT10 PE=1 SV=6	42	20	48	15	58.8	1.562	1.337	1.401	1.204	1.044	2.206	1.232	1.571	1.548	2949.4	4608.3	3942.9	4132	3549.8	3078	6504.9	3633.7	4634.3	4565.2	-0.0106	0.99063	0.971	-0.386	0.669667	0.997
P13646	KRT13	Keratin, type I cytoskeletal 13 OS=Homo sapiens OX=9606 GN=KRT13 PE=1 SV=4	14	7	11	2	49.6	2.131	0.921	0.933	1.071	0.956	1.161	3.169	1.868	1.119	45.6	97.2	42	42.5	48.9	43.6	53	144.5	85.2	51	2.48	0.127426	0.861	-0.116	0.939658	0.998
P13647	KRT5	Keratin, type II cytoskeletal 5 OS=Homo sapiens OX=9606 GN=KRT5 PE=1 SV=3	27	16	29	10	62.3	1.601	1.066	1.163	1.191	1.038	1.689	1.276	1.381	1.37	1741.8	2788.1	1857.4	2025.1	2074.4	1807.4	2942.2	2222.5	2405.3	2387	0.596	0.520359	0.953	0.21	0.819398	0.997
P13667	PDIA4	Protein disulfide-isomerase A4 OS=Homo sapiens OX=9606 GN=PDIA4 PE=1 SV=2	43	24	70	24	72.9	0.952	0.897	1.007	1.037	1.18	0.853	0.964	1.141	0.925	13688.7	13026.3	12277.7	13781	14195.8	16156.6	11678	13190.7	15624.8	12667.8	0.554	0.558237	0.956	0.826	0.387967	0.996
P13674	P4HA1	Prolyl 4-hydroxylase subunit alpha-1 OS=Homo sapiens OX=9606 GN=P4HA1 PE=1 SV=2	16	8	10	8	61	1.118	0.842	1.005	0.983	0.979	0.939	0.855	0.855	0.889	1246.9	1393.7	1050	1252.9	1225.9	1220.4	1170.8	1066.6	1065.8	1108.2	-1.49	0.0619223	0.757	-0.317	0.664667	0.997
P13693	TPT1	Translationally-controlled tumor protein OS=Homo sapiens OX=9606 GN=TPT1 PE=1 SV=1	32	5	12	5	19.6	0.992	0.9	1.05	0.847	0.968	0.909	0.927	1.084	1.065	2758.3	2736.9	2482.3	2896.8	2336.2	2670.2	2506.5	2556	2988.8	2938.8	0.324	0.644682	0.96	-0.869	0.231423	0.995
P13716	ALAD	Delta-aminolevulinic acid dehydratase OS=Homo sapiens OX=9606 GN=ALAD PE=1 SV=1	9	2	2	2	36.3	0.833	1.21	1.124	0.817	0.858	0.844	0.861	1.007	1.236	479.3	399.3	579.9	538.6	391.3	411.2	404.5	412.8	482.5	592.6	-0.379	0.723516	0.964	-2.16	0.0646503	0.988
P13747	HLA-E	HLA class I histocompatibility antigen, alpha chain E OS=Homo sapiens OX=9606 GN=HLA-E PE=1 SV=4	3	1	1	1	40	0.822	1.068	1.275	1.876	1.844	2.57	1.25	0.833	0.803	49.6	40.8	53	63.2	93.1	91.5	127.5	62	41.3	39.8	-0.766	0.556022	0.955	3.97	0.0100868	0.946
P13796	LCP1	Plastin-2 OS=Homo sapiens OX=9606 GN=LCP1 PE=1 SV=6	7	4	8	1	70.2	1.709	1.068	1.206	1.544	1.152	1.306	1.302	0.932	0.799	25.3	43.3	27	30.5	39.1	29.2	33.1	33	23.6	20.2	-2.16	0.0927169	0.822	0.498	0.677007	0.997
P13797	PLS3	Plastin-3 OS=Homo sapiens OX=9606 GN=PLS3 PE=1 SV=4	27	15	31	10	70.8	0.83	0.976	0.972	0.812	0.764	0.835	1.011	1.169	1.196	3887.3	3226.6	3795.4	3777	3155.6	2969.4	3247.7	3928.5	4543.8	4647.6	1.95	0.010409	0.346	-1.19	0.0846864	0.99
P13798	APEH	Acylamino-acid-releasing enzyme OS=Homo sapiens OX=9606 GN=APEH PE=1 SV=4	24	14	25	14	81.2	0.88	1.342	1.038	1.066	1.174	1.05	1.01	0.953	0.992	2935.6	2583.1	3939.7	3047.3	3129.2	3447.1	3082.8	2964.2	2798.5	2912.9	-0.706	0.437238	0.946	0.753	0.408654	0.996
P13804	ETFA	Electron transfer flavoprotein subunit alpha, mitochondrial OS=Homo sapiens OX=9606 GN=ETFA PE=1 SV=1	35	10	20	10	35.1	1.062	1.266	0.982	0.962	1.106	0.99	1.075	0.893	1.058	3438.4	3652.6	4353.9	3375.3	3309.3	3804.4	3404.8	3696.1	3070.1	3637.8	-0.837	0.346367	0.936	-0.598	0.49578	0.997
P13807	GYS1	Glycogen [starch] synthase, muscle OS=Homo sapiens OX=9606 GN=GYS1 PE=1 SV=2	3	2	2	1	83.7	0.947	1.298	1.131	0.858	1.159	1.102	0.847	0.903	0.98	64.5	61.1	83.8	73	55.4	74.8	71.1	54.7	58.3	63.3	-2.08	0.066976	0.771	-0.481	0.644762	0.997
P13861	PRKAR2A	cAMP-dependent protein kinase type II-alpha regulatory subunit OS=Homo sapiens OX=9606 GN=PRKAR2A PE=1 SV=2	45	15	24	13	45.5	1.017	1.098	0.967	0.986	1.077	0.977	1.023	0.964	1.021	2993.3	3043.3	3285.7	2895.2	2951.6	3222.6	2924.3	3061.6	2884.5	3055.3	-0.326	0.60756	0.958	-0.0336	0.957538	0.998
P13929	ENO3	Beta-enolase OS=Homo sapiens OX=9606 GN=ENO3 PE=1 SV=5	11	3	14	2	47	1.059	0.861	0.991	0.871	0.951	0.887	0.912	0.956	0.997	1741.9	1845.4	1499.7	1727	1517.7	1656.9	1545.2	1587.9	1664.5	1736	-0.432	0.521671	0.953	-0.903	0.195448	0.994
P13984	GTF2F2	General transcription factor IIF subunit 2 OS=Homo sapiens OX=9606 GN=GTF2F2 PE=1 SV=2	25	6	6	6	28.4	1.038	0.926	0.987	1.005	1.073	1.013	1.029	1.071	1.126	618.6	641.9	572.6	610.7	621.7	663.5	626.5	636.8	662.6	696.5	0.89	0.135706	0.868	0.638	0.271436	0.995
P13995	MTHFD2	Bifunctional methylenetetrahydrofolate dehydrogenase/cyclohydrolase, mitochondrial OS=Homo sapiens OX=9606 GN=MTHFD2 PE=1 SV=2	26	7	8	7	37.9	1.129	0.91	0.718	1.25	1.203	1.262	1.224	0.866	0.715	1901.7	2147.6	1729.6	1364.6	2377.4	2288.1	2399.2	2327.7	1646.2	1359.6	0.0573	0.963569	0.971	2.88	0.040386	0.983
P14174	MIF	Macrophage migration inhibitory factor OS=Homo sapiens OX=9606 GN=MIF PE=1 SV=4	34	3	11	3	12.5	1.179	0.972	0.98	1.038	1.092	1.07	1.042	0.865	0.935	1140.2	1344	1108.7	1117.5	1183.3	1244.8	1220.5	1188.4	985.8	1066.3	-1.01	0.225411	0.911	0.516	0.523247	0.997
P14314	PRKCSH	Glucosidase 2 subunit beta OS=Homo sapiens OX=9606 GN=PRKCSH PE=1 SV=2	23	10	22	10	59.4	1.075	0.868	0.896	1.092	0.977	1.055	0.988	0.927	0.934	2823.4	3036.4	2451.7	2530.4	3082.9	2758.5	2979.8	2788.1	2618.5	2638.4	-0.141	0.851438	0.968	1.14	0.151168	0.993
P14324	FDPS	Farnesyl pyrophosphate synthase OS=Homo sapiens OX=9606 GN=FDPS PE=1 SV=4	11	4	9	4	48.2	1.034	0.876	0.926	1.02	1.141	0.993	1.021	0.949	0.95	1703	1760.8	1491.8	1577.5	1736.7	1943.7	1690.5	1738.5	1616.1	1618.4	0.186	0.791129	0.966	1.22	0.103849	0.991
P14373	TRIM27	Zinc finger protein RFP OS=Homo sapiens OX=9606 GN=TRIM27 PE=1 SV=1	5	2	2	2	58.5	0.933	0.98	1.07	1.023	0.978	0.966	1.082	1.047	1.071	159.2	148.5	156	170.3	162.9	155.7	153.7	172.2	166.6	170.5	0.802	0.191756	0.899	0.0697	0.905691	0.998
P14406	COX7A2	Cytochrome c oxidase subunit 7A2, mitochondrial OS=Homo sapiens OX=9606 GN=COX7A2 PE=1 SV=1	28	2	2	2	9.4	1.07	0.858	1.067	0.9	0.883	0.925	0.849	0.78	1.119	249	266.3	213.7	265.8	224.2	219.9	230.2	211.4	194.3	278.6	-1.05	0.267392	0.922	-1.24	0.197332	0.994
P14550	AKR1A1	Aldo-keto reductase family 1 member A1 OS=Homo sapiens OX=9606 GN=AKR1A1 PE=1 SV=3	23	7	7	7	36.6	0.984	1.253	1.21	1.008	1.124	0.929	1.087	0.887	0.938	1593.3	1567.6	1995.7	1927.9	1605.9	1790.6	1481	1732.1	1413.8	1494.1	-1.57	0.113579	0.848	-0.947	0.319602	0.996
P14618	PKM	Pyruvate kinase PKM OS=Homo sapiens OX=9606 GN=PKM PE=1 SV=4	58	24	85	24	57.9	1.012	0.972	1.025	0.981	1.097	1.018	1.055	1	1.026	12995.2	13145.6	12630.5	13321	12745.6	14249.9	13229.8	13712.2	12997.9	13330.6	0.198	0.736803	0.964	0.421	0.479205	0.997
P14625	HSP90B1	Endoplasmin OS=Homo sapiens OX=9606 GN=HSP90B1 PE=1 SV=1	38	28	110	27	92.4	0.956	0.794	1.037	0.974	1.102	0.853	0.861	1.105	0.906	16134.1	15428	12806.9	16725	15714.5	17776.6	13758.3	13898.9	17820.9	14612.3	0.112	0.90782	0.969	0.442	0.650511	0.997
P14635	CCNB1	G2/mitotic-specific cyclin-B1 OS=Homo sapiens OX=9606 GN=CCNB1 PE=1 SV=1	8	3	3	3	48.3	1.083	1.009	0.979	1.131	0.91	1.02	1.016	0.876	0.954	258.3	279.6	260.6	253	292.1	234.9	263.4	262.4	226.1	246.5	-0.899	0.280578	0.925	0.0465	0.954173	0.998
P14649	MYL6B	Myosin light chain 6B OS=Homo sapiens OX=9606 GN=MYL6B PE=1 SV=1	16	3	9	1	22.8	1.005	0.922	1.2	0.795	0.74	0.787	0.959	1.063	0.967	305.1	306.6	281.3	366.2	242.5	225.8	240.2	292.6	324.4	295	-0.496	0.493061	0.951	-2.58	0.00402845	0.876
P14678	SNRPB	Small nuclear ribonucleoprotein-associated proteins B and B' OS=Homo sapiens OX=9606 GN=SNRPB PE=1 SV=2	15	4	7	4	24.6	1.021	0.915	1.028	1.077	0.962	1.036	1.028	1.061	0.975	1111.7	1134.7	1017.3	1143.1	1197.2	1069.8	1151.5	1142.3	1180	1083.9	0.303	0.638087	0.96	0.537	0.410573	0.996
P14735	IDE	Insulin-degrading enzyme OS=Homo sapiens OX=9606 GN=IDE PE=1 SV=4	7	7	8	7	117.9	0.955	0.95	1.037	0.924	0.943	0.872	0.894	0.999	1.045	703.1	671.7	667.7	729.4	649.4	662.7	613.1	628.9	702.6	734.7	-0.157	0.794819	0.966	-0.796	0.20569	0.994
P14854	COX6B1	Cytochrome c oxidase subunit 6B1 OS=Homo sapiens OX=9606 GN=COX6B1 PE=1 SV=2	23	2	2	2	10.2	0.779	0.657	1.268	0.783	0.8	0.919	1.113	0.987	1.237	36.5	28.5	24	46.3	28.6	29.2	33.6	40.7	36.1	45.2	1.8	0.148831	0.877	-0.876	0.465346	0.996
P14859	POU2F1	POU domain, class 2, transcription factor 1 OS=Homo sapiens OX=9606 GN=POU2F1 PE=1 SV=2	1	1	2	1	76.4	0.945	0.875	0.845	1.165	1.033	1.058	1.022	0.903	0.789	201.4	190.4	176.2	170.1	234.6	208	213	205.9	181.8	158.9	0.273	0.70557	0.963	2.29	0.00835522	0.937
P14866	HNRNPL	Heterogeneous nuclear ribonucleoprotein L OS=Homo sapiens OX=9606 GN=HNRNPL PE=1 SV=2	35	16	39	15	64.1	1.038	0.986	1.007	0.978	1.027	0.989	0.985	1.02	1.025	6650.7	6900.4	6560.2	6699.5	6506.5	6829.6	6574.7	6548.1	6784.3	6814.9	-0.131	0.796791	0.966	-0.0786	0.876841	0.998
P14868	DARS1	Aspartate--tRNA ligase, cytoplasmic OS=Homo sapiens OX=9606 GN=DARS1 PE=1 SV=2	54	24	39	24	57.1	1.02	0.964	0.996	0.977	1.1	1.022	0.96	0.931	0.959	5559.5	5671.1	5361.2	5538	5429.3	6117.3	5682.4	5335.6	5178	5328.9	-0.63	0.286482	0.926	0.537	0.360358	0.996
P14923	JUP	Junction plakoglobin OS=Homo sapiens OX=9606 GN=JUP PE=1 SV=3	37	21	28	19	81.7	0.951	0.834	0.886	1.212	0.945	1.176	0.978	1.177	0.969	2974.9	2828.3	2479.7	2635	3604.3	2812.3	3498.3	2908.4	3502.4	2884.1	1.46	0.118425	0.853	2.32	0.0218722	0.972
P14927	UQCRB	Cytochrome b-c1 complex subunit 7 OS=Homo sapiens OX=9606 GN=UQCRB PE=1 SV=2	27	3	3	3	13.5	1.088	1.067	1.098	1.025	0.783	0.986	1.008	0.861	0.924	818.7	890.7	873.3	899.3	839.2	640.9	807.6	825	705	756.7	-1.73	0.0452369	0.693	-1.52	0.0725388	0.988
P15104	GLUL	Glutamine synthetase OS=Homo sapiens OX=9606 GN=GLUL PE=1 SV=4	12	4	4	4	42	1.303	0.879	0.628	1.906	1.363	1.069	0.949	0.526	0.719	662.7	863.6	582.2	416.1	1263	903.1	708.4	628.7	348.8	476.7	-1.54	0.267936	0.922	3.13	0.0382892	0.982
P15121	AKR1B1	Aldo-keto reductase family 1 member B1 OS=Homo sapiens OX=9606 GN=AKR1B1 PE=1 SV=3	3	1	1	1	35.8	0.99	1.307	1.175	1.003	1.31	0.958	1.099	0.922	1.045	221.6	219.4	289.7	260.4	222.3	290.4	212.3	243.6	204.4	231.6	-1.09	0.283002	0.925	-0.514	0.604116	0.997
P15151	PVR	Poliovirus receptor OS=Homo sapiens OX=9606 GN=PVR PE=1 SV=2	6	2	4	2	45.3	1.038	1.022	0.915	0.996	0.786	1.004	0.885	1.057	0.945	259.8	269.8	265.4	237.8	258.8	204.2	260.9	229.9	274.7	245.5	-0.467	0.572476	0.956	-0.551	0.506478	0.997
P15170	GSPT1	Eukaryotic peptide chain release factor GTP-binding subunit ERF3A OS=Homo sapiens OX=9606 GN=GSPT1 PE=1 SV=1	18	8	10	8	55.7	1.12	1.034	0.987	0.977	1.052	0.992	0.961	0.986	0.932	2782.9	3116.8	2878.3	2748	2719.5	2928.7	2759.6	2674.5	2743.1	2593.4	-1.09	0.0948795	0.825	-0.353	0.56288	0.997
P15259	PGAM2	Phosphoglycerate mutase 2 OS=Homo sapiens OX=9606 GN=PGAM2 PE=1 SV=3	28	6	15	3	28.7	0.366	0.664	1.69	0.603	0.677	0.581	0.637	1.242	1.474	497.5	182.2	330.1	840.6	300	336.8	289.1	316.7	617.7	733.1	1.51	0.431344	0.946	-2.05	0.289489	0.995
P15289	ARSA	Arylsulfatase A OS=Homo sapiens OX=9606 GN=ARSA PE=1 SV=3	5	2	3	2	53.6	0.7	1.136	1.144	0.913	1.071	0.838	0.963	1.031	1.162	45.6	31.9	51.8	52.1	41.6	48.8	38.2	43.9	47	53	0.337	0.769687	0.965	-0.67	0.563443	0.997
P15291	B4GALT1	Beta-1,4-galactosyltransferase 1 OS=Homo sapiens OX=9606 GN=B4GALT1 PE=1 SV=5	9	2	2	2	43.9	1.318	1.205	0.822	1.023	0.896	1.175	0.979	0.886	0.71	33.5	44.1	40.4	27.5	34.3	30	39.3	32.8	29.7	23.8	-2.16	0.0979305	0.829	-0.481	0.69244	0.997
P15311	EZR	Ezrin OS=Homo sapiens OX=9606 GN=EZR PE=1 SV=4	31	19	31	14	69.4	0.92	0.946	0.887	1.112	0.908	1.192	1.181	1.017	0.854	3204.3	2947.6	3030.4	2840.8	3563.6	2908.1	3819.4	3784.6	3257.3	2737.5	1.12	0.285635	0.926	1.75	0.107312	0.991
P15374	UCHL3	Ubiquitin carboxyl-terminal hydrolase isozyme L3 OS=Homo sapiens OX=9606 GN=UCHL3 PE=1 SV=1	28	5	6	5	26.2	1.067	1.253	1.154	0.983	0.988	0.929	1.062	1.008	0.932	657.1	701.4	823.3	758.4	646	649.2	610.5	697.6	662.3	612.5	-1.46	0.038059	0.652	-1.81	0.0143106	0.96
P15428	HPGD	15-hydroxyprostaglandin dehydrogenase [NAD(+)] OS=Homo sapiens OX=9606 GN=HPGD PE=1 SV=1	23	5	8	5	29	0.619	1.124	0.835	1.113	0.887	1.158	1.27	1.128	1.068	703	435.3	789.9	586.9	782.4	623.8	814.1	892.5	792.7	751.1	2.55	0.0506	0.717	1.8	0.147378	0.993
P15529	CD46	Membrane cofactor protein OS=Homo sapiens OX=9606 GN=CD46 PE=1 SV=3	2	1	2	1	43.7	0.764	0.911	0.807	1.052	0.871	1.165	0.894	1.082	0.882	427.1	326.2	388.9	344.6	449.4	372	497.5	382	462.3	376.8	1.11	0.254853	0.919	2.1	0.0446003	0.984
P15531	NME1	Nucleoside diphosphate kinase A OS=Homo sapiens OX=9606 GN=NME1 PE=1 SV=1	48	7	24	3	17.1	0.911	0.869	0.981	0.94	0.962	1.032	0.966	0.924	1.014	981.2	893.7	852.7	962.3	922.6	943.9	1012.9	948.2	906.5	995.1	0.403	0.513407	0.953	0.692	0.271448	0.995
P15559	NQO1	NAD(P)H dehydrogenase [quinone] 1 OS=Homo sapiens OX=9606 GN=NQO1 PE=1 SV=1	12	4	5	4	30.8	1.237	1.534	0.579	2.603	1.043	0.642	0.561	0.483	0.188	944	1167.7	1448	546.4	2457.1	984.5	606.5	529.1	456.1	177.1	-4.17	0.0527854	0.726	0.153	0.937229	0.998
P15586	GNS	N-acetylglucosamine-6-sulfatase OS=Homo sapiens OX=9606 GN=GNS PE=1 SV=3	10	6	12	6	62	1.016	1.132	0.994	0.947	0.996	0.998	1.004	0.819	0.989	1737.6	1765.3	1966.5	1727.2	1645.5	1729.8	1734.3	1745	1423.9	1718	-1.15	0.12362	0.858	-0.641	0.372376	0.996
P15735	PHKG2	Phosphorylase b kinase gamma catalytic chain, liver/testis isoform OS=Homo sapiens OX=9606 GN=PHKG2 PE=1 SV=1	10	3	4	3	46.4	0.965	0.87	1.036	0.97	0.862	0.848	1.028	1.075	1.063	195.6	188.7	170.2	202.7	189.8	168.6	165.9	201.2	210.3	208	1.02	0.120627	0.855	-0.737	0.247275	0.995
P15880	RPS2	40S ribosomal protein S2 OS=Homo sapiens OX=9606 GN=RPS2 PE=1 SV=2	31	10	19	10	31.3	1.011	1.101	0.986	1.151	1.109	1.074	1.097	1.068	1.055	4581.4	4632	5044.2	4517.3	5271.2	5079.4	4922.7	5025.7	4890.9	4832.7	0.444	0.442534	0.947	1.07	0.083571	0.99
P15884	TCF4	Transcription factor 4 OS=Homo sapiens OX=9606 GN=TCF4 PE=1 SV=3	2	2	2	1	71.3	0.995	0.863	1.156	0.883	0.947	0.824	1.202	1.337	1.124	198	197.1	170.9	228.9	174.7	187.4	163.2	238	264.7	222.5	1.82	0.0399722	0.664	-1.35	0.111118	0.991
P15923	TCF3	Transcription factor E2-alpha OS=Homo sapiens OX=9606 GN=TCF3 PE=1 SV=1	2	1	1	1	67.6	0.803	0.814	1.03	0.854	0.783	0.747	0.775	1.001	1.077	49.3	39.6	40.1	50.8	42.1	38.6	36.8	38.2	49.3	53.1	0.54	0.535454	0.954	-0.922	0.299062	0.995
P15924	DSP	Desmoplakin OS=Homo sapiens OX=9606 GN=DSP PE=1 SV=3	9	24	26	24	331.6	1.044	0.909	0.952	0.91	0.761	1.034	1.166	1.319	1.226	2579.4	2692.9	2345	2455	2347.8	1961.7	2666.3	3008.5	3401.6	3162.4	2.3	0.0137453	0.389	-0.615	0.445594	0.996
P15927	RPA2	Replication protein A 32 kDa subunit OS=Homo sapiens OX=9606 GN=RPA2 PE=1 SV=1	14	4	8	4	29.2	1.101	0.996	0.808	1.099	1.135	1.174	1.052	0.812	0.812	888	977.2	884.7	717.4	976	1007.6	1042.6	933.9	721	720.7	-0.76	0.43413	0.946	1.81	0.0807338	0.989
P15954	COX7C	Cytochrome c oxidase subunit 7C, mitochondrial OS=Homo sapiens OX=9606 GN=COX7C PE=1 SV=1	29	2	4	2	7.2	1.131	0.817	1.16	0.97	0.788	0.842	0.912	0.853	0.888	1397.1	1579.5	1140.8	1620.2	1355.3	1101.1	1176.5	1274.6	1191.5	1240.8	-1.79	0.0685693	0.775	-1.84	0.061655	0.987
P16083	NQO2	Ribosyldihydronicotinamide dehydrogenase [quinone] OS=Homo sapiens OX=9606 GN=NQO2 PE=1 SV=5	29	5	10	5	25.9	1.019	1.246	1.194	0.896	0.935	0.94	0.908	1.047	0.926	1222.7	1246.3	1523.5	1459.8	1096	1143.4	1149.7	1110.7	1280	1132.2	-1.89	0.0156022	0.406	-2.26	0.00593817	0.914
P16104	H2AX	Histone H2AX OS=Homo sapiens OX=9606 GN=H2AX PE=1 SV=2	27	5	20	2	15.1	1.145	0.891	0.831	1.288	1.028	1.127	1.058	0.778	0.674	1532	1754	1365.5	1272.8	1972.7	1574.7	1726.4	1621.2	1191.9	1032.2	-0.843	0.464001	0.949	1.94	0.109983	0.991
P16152	CBR1	Carbonyl reductase [NADPH] 1 OS=Homo sapiens OX=9606 GN=CBR1 PE=1 SV=3	54	11	16	9	30.4	0.983	1.101	1.228	0.883	1.006	0.872	0.811	1.241	1.062	1360.3	1336.9	1498	1670.3	1201.3	1368.2	1186.1	1102.6	1688.7	1444.9	-0.772	0.460936	0.949	-1.84	0.0976018	0.991
P16219	ACADS	Short-chain specific acyl-CoA dehydrogenase, mitochondrial OS=Homo sapiens OX=9606 GN=ACADS PE=1 SV=1	13	5	7	5	44.3	0.787	1.372	1.211	0.786	0.983	0.776	0.823	1.022	1.382	576.6	453.8	791.4	698.4	453	566.6	447.6	474.4	589.3	796.8	-0.542	0.698005	0.963	-2.26	0.12705	0.992
P16220	CREB1	Cyclic AMP-responsive element-binding protein 1 OS=Homo sapiens OX=9606 GN=CREB1 PE=1 SV=2	11	2	3	1	36.7	1.027	1.149	1.007	1.009	0.903	0.977	1.086	0.873	0.79	98.4	101.1	113.1	99.1	99.3	88.9	96.2	106.9	85.9	77.8	-1.36	0.139595	0.871	-0.969	0.278285	0.995
P16298	PPP3CB	Serine/threonine-protein phosphatase 2B catalytic subunit beta isoform OS=Homo sapiens OX=9606 GN=PPP3CB PE=1 SV=2	15	7	12	2	59	1.087	0.67	1.035	0.857	1.011	0.851	0.874	1.174	1.156	308.3	335	206.5	319.2	264.1	311.8	262.5	269.6	362	356.5	0.788	0.488813	0.951	-0.704	0.535488	0.997
P16333	NCK1	Cytoplasmic protein NCK1 OS=Homo sapiens OX=9606 GN=NCK1 PE=1 SV=1	14	5	5	5	42.8	0.84	0.895	1.019	0.852	0.926	0.821	0.861	1.077	1.129	278.6	233.9	249.2	283.9	237.4	258	228.6	239.8	300.1	314.4	0.955	0.262349	0.921	-0.607	0.467673	0.996
P16383	GCFC2	GC-rich sequence DNA-binding factor 2 OS=Homo sapiens OX=9606 GN=GCFC2 PE=1 SV=2	4	3	3	3	89.3	0.829	0.935	1.164	1.133	1.138	0.946	1.168	1.034	1.031	45.2	37.5	42.2	52.6	51.2	51.4	42.7	52.8	46.7	46.6	1.09	0.285316	0.926	1.21	0.238892	0.995
P16401	H1-5	Histone H1.5 OS=Homo sapiens OX=9606 GN=H1-5 PE=1 SV=3	39	9	25	6	22.6	1.009	0.882	1.007	1.138	1.005	1.121	1.173	1.151	0.833	2038.3	2056.3	1798.4	2052.3	2318.6	2049	2284.8	2391.2	2346	1697.3	0.901	0.354345	0.937	1.45	0.148647	0.993
P16422	EPCAM	Epithelial cell adhesion molecule OS=Homo sapiens OX=9606 GN=EPCAM PE=1 SV=2	14	3	3	3	34.9	1.118	0.98	1.094	0.742	0.758	0.73	0.989	1.173	1.276	389.8	435.8	382.2	426.2	289.4	295.4	284.7	385.6	457.1	497.3	0.449	0.516775	0.953	-3.13	0.000841155	0.501
P16435	POR	NADPH--cytochrome P450 reductase OS=Homo sapiens OX=9606 GN=POR PE=1 SV=2	20	13	20	13	76.6	0.977	0.994	1.061	0.945	1.05	0.93	0.951	1.067	0.974	2276.6	2225.2	2263.1	2415.1	2152.2	2390.8	2116.4	2164.4	2428.9	2216.4	-0.242	0.706872	0.963	-0.375	0.562638	0.997
P16615	ATP2A2	Sarcoplasmic/endoplasmic reticulum calcium ATPase 2 OS=Homo sapiens OX=9606 GN=ATP2A2 PE=1 SV=1	10	9	10	8	114.7	0.743	0.62	0.672	1.072	0.704	1.155	0.89	1.213	1.091	1039.7	772.4	644.4	698.2	1114.2	731.7	1200.5	924.9	1261.2	1134.7	2.96	0.0243806	0.532	2.63	0.0403796	0.983
P16870	CPE	Carboxypeptidase E OS=Homo sapiens OX=9606 GN=CPE PE=1 SV=1	13	6	8	6	53.1	0.909	1.139	1.516	0.901	0.932	0.885	0.986	0.995	1.074	961.6	874.4	1095.5	1457.5	866.7	896.5	851.2	948.1	956.3	1032.6	-1	0.29384	0.927	-2.21	0.0344065	0.98
P16930	FAH	Fumarylacetoacetase OS=Homo sapiens OX=9606 GN=FAH PE=1 SV=2	10	4	5	4	46.3	0.86	1.276	1.203	0.744	0.884	0.816	0.789	1.067	1.034	1459.4	1255.3	1862.1	1756.3	1086.5	1290.7	1191.6	1151.6	1557.2	1509.6	-1.22	0.271519	0.923	-2.68	0.028796	0.977
P16949	STMN1	Stathmin OS=Homo sapiens OX=9606 GN=STMN1 PE=1 SV=3	50	8	17	7	17.3	0.95	0.46	0.736	0.976	0.553	1.03	1.189	0.944	1.068	3856.5	3665	1773	2836.8	3765.6	2134.6	3973.2	4587.3	3639.8	4120.3	2.58	0.0398723	0.663	1.07	0.350162	0.996
P16989	YBX3	Y-box-binding protein 3 OS=Homo sapiens OX=9606 GN=YBX3 PE=1 SV=4	45	8	13	7	40.1	1.005	1.017	1.011	1.161	0.924	1.019	1.149	1.052	0.966	901.3	906.2	916.7	911.3	1046.8	832.5	918.7	1035.6	948.3	871.1	0.423	0.604696	0.958	0.335	0.681291	0.997
P17028	ZNF24	Zinc finger protein 24 OS=Homo sapiens OX=9606 GN=ZNF24 PE=1 SV=4	5	2	3	1	42.1	1.14	0.945	0.894	1.218	1.152	1.092	1.103	0.994	0.956	284.9	324.9	269.3	254.6	347	328.4	311.1	314.3	283.1	272.5	0.223	0.790971	0.966	1.79	0.0533671	0.986
P17029	ZKSCAN1	Zinc finger protein with KRAB and SCAN domains 1 OS=Homo sapiens OX=9606 GN=ZKSCAN1 PE=1 SV=3	5	3	3	3	63.6	1.066	0.953	0.956	1.236	1.303	1.211	1.078	0.975	1.125	329.1	351	313.6	314.6	406.8	428.9	398.5	354.7	320.7	370.3	0.607	0.36535	0.939	2.39	0.00379135	0.868
P17050	NAGA	Alpha-N-acetylgalactosaminidase OS=Homo sapiens OX=9606 GN=NAGA PE=1 SV=2	6	2	2	2	46.5	0.867	0.998	0.793	1.052	1.111	1.1	1.021	1.15	1.015	286	247.9	285.4	226.8	301	317.7	314.6	291.9	328.8	290.3	1.77	0.0230519	0.515	2.33	0.00547143	0.907
P17152	TMEM11	Transmembrane protein 11, mitochondrial OS=Homo sapiens OX=9606 GN=TMEM11 PE=1 SV=1	6	1	1	1	21.5	1.041	1.244	1.117	1.12	0.964	1.022	1.096	1.115	1.333	16.8	17.5	20.9	18.7	18.8	16.2	17.1	18.4	18.7	22.4	0.3	0.658574	0.961	-0.708	0.307014	0.995
P17174	GOT1	Aspartate aminotransferase, cytoplasmic OS=Homo sapiens OX=9606 GN=GOT1 PE=1 SV=3	32	13	30	13	46.2	0.966	1.104	0.856	1.017	1.064	1.047	1.057	1.019	0.898	6959.9	6724.3	7682.1	5958.1	7081.7	7403.5	7289.3	7359	7090.7	6247.9	0.224	0.776101	0.965	0.963	0.236928	0.995
P17301	ITGA2	Integrin alpha-2 OS=Homo sapiens OX=9606 GN=ITGA2 PE=1 SV=1	2	3	3	3	129.2	1	0.852	0.901	1.187	0.774	1.222	1.104	1.16	1.293	79.5	79.5	67.8	71.7	94.4	61.5	97.1	87.8	92.2	102.8	2.48	0.0403799	0.666	1.54	0.17586	0.994
P17544	ATF7	Cyclic AMP-dependent transcription factor ATF-7 OS=Homo sapiens OX=9606 GN=ATF7 PE=1 SV=2	10	4	4	4	52.9	1.225	0.799	0.795	1.103	1.012	1.034	1.203	0.905	0.965	773.4	947.4	618	614.9	853.1	782.4	799.7	930.4	699.7	746.5	0.633	0.601725	0.958	1.28	0.300842	0.995
P17568	NDUFB7	NADH dehydrogenase [ubiquinone] 1 beta subcomplex subunit 7 OS=Homo sapiens OX=9606 GN=NDUFB7 PE=1 SV=4	32	4	7	4	16.4	1.109	1.156	1.064	1.001	0.898	0.92	0.896	0.955	1.029	1058.9	1174.1	1224.4	1126.5	1059.7	951.3	974	948.6	1010.9	1089.4	-1.77	0.0132878	0.384	-1.82	0.0115872	0.953
P17612	PRKACA	cAMP-dependent protein kinase catalytic subunit alpha OS=Homo sapiens OX=9606 GN=PRKACA PE=1 SV=2	5	2	3	2	40.6	1.151	1.243	1.166	1.379	1.453	0.934	1.372	1.308	0.988	147.5	169.8	183.4	172	203.4	214.3	137.7	202.4	192.9	145.8	-0.0842	0.940554	0.97	0.0297	0.978976	0.998
P17676	CEBPB	CCAAT/enhancer-binding protein beta OS=Homo sapiens OX=9606 GN=CEBPB PE=1 SV=2	3	1	1	1	36.1	1.401	1.098	0.873	1.417	1.106	1.247	1.459	1.115	0.669	110	154.1	120.7	96	155.8	121.6	137.2	160.4	122.6	73.5	-0.226	0.876105	0.969	1.4	0.344431	0.996
P17706	PTPN2	Tyrosine-protein phosphatase non-receptor type 2 OS=Homo sapiens OX=9606 GN=PTPN2 PE=1 SV=2	12	4	4	4	48.4	1.05	0.976	1.097	0.982	1.013	0.987	0.94	1.041	0.987	146.2	153.5	142.7	160.3	143.6	148	144.2	137.4	152.2	144.2	-0.726	0.219597	0.909	-0.466	0.420105	0.996
P17707	AMD1	S-adenosylmethionine decarboxylase proenzyme OS=Homo sapiens OX=9606 GN=AMD1 PE=1 SV=2	4	1	1	1	38.3	0.904	1.122	0.798	0.981	0.854	0.871	1.21	0.975	0.795	54.2	49	60.9	43.3	53.2	46.3	47.2	65.6	52.9	43.1	0.568	0.61313	0.959	-0.45	0.688085	0.997
P17812	CTPS1	CTP synthase 1 OS=Homo sapiens OX=9606 GN=CTPS1 PE=1 SV=2	23	13	28	11	66.6	1.104	0.981	0.923	1.025	0.984	1.009	0.941	0.942	0.92	4834.5	5336.9	4741.7	4464.1	4957.5	4757.5	4879	4547.1	4553	4449.8	-0.906	0.177438	0.893	0.153	0.811482	0.997
P17844	DDX5	Probable ATP-dependent RNA helicase DDX5 OS=Homo sapiens OX=9606 GN=DDX5 PE=1 SV=1	43	26	60	18	69.1	1.042	0.964	0.967	1.002	1.02	1.004	1.059	1.069	1.012	6515.2	6789.4	6283.3	6303.3	6525.7	6642.8	6543.6	6900.5	6962.7	6591.7	0.573	0.313062	0.931	0.304	0.585324	0.997
P17858	PFKL	ATP-dependent 6-phosphofructokinase, liver type OS=Homo sapiens OX=9606 GN=PFKL PE=1 SV=6	29	20	35	17	85	0.9	0.972	1.06	1.003	1.042	1.022	0.958	1.002	0.996	4728.2	4255.5	4596.4	5010.4	4744.1	4928.1	4831.3	4529.5	4736	4708.7	0.00411	0.994463	0.972	0.7	0.252844	0.995
P17936	IGFBP3	Insulin-like growth factor-binding protein 3 OS=Homo sapiens OX=9606 GN=IGFBP3 PE=1 SV=2	3	1	2	1	31.7	0.839	1.297	1.597	0.803	1.044	0.932	0.937	1.247	0.958	123.9	104	160.7	197.9	99.5	129.4	115.5	116.1	154.6	118.7	-1	0.462075	0.949	-1.97	0.163537	0.993
P17980	PSMC3	26S proteasome regulatory subunit 6A OS=Homo sapiens OX=9606 GN=PSMC3 PE=1 SV=3	46	16	26	16	49.2	1.065	1.003	0.972	0.995	1.043	1.01	1.024	0.967	0.932	5099.9	5430.6	5116.2	4955.2	5076.5	5320.5	5152.4	5221.8	4932.6	4753.9	-0.511	0.404059	0.943	0.138	0.818876	0.997
P17987	TCP1	T-complex protein 1 subunit alpha OS=Homo sapiens OX=9606 GN=TCP1 PE=1 SV=1	43	19	45	19	60.3	1.091	1.053	0.966	0.994	1.015	1.023	1.007	0.98	0.888	6694.9	7302.6	7050.7	6470.5	6655.1	6798	6846.2	6740.3	6558.8	5948.1	-0.908	0.171985	0.89	-0.171	0.787342	0.997
P18031	PTPN1	Tyrosine-protein phosphatase non-receptor type 1 OS=Homo sapiens OX=9606 GN=PTPN1 PE=1 SV=1	14	5	5	5	49.9	1.053	1.011	0.949	1.017	1.04	0.995	0.947	0.949	0.959	865.4	911.1	874.5	820.9	879.7	900.4	860.8	819.6	821.3	829.7	-0.755	0.186755	0.897	0.269	0.624189	0.997
P18065	IGFBP2	Insulin-like growth factor-binding protein 2 OS=Homo sapiens OX=9606 GN=IGFBP2 PE=1 SV=2	27	6	8	6	34.8	1.398	1.166	1.081	1.171	0.733	1.158	0.97	0.69	0.695	314.1	439.3	366.2	339.6	367.9	230.2	363.7	304.5	216.6	218.3	-3.51	0.013035	0.381	-1.31	0.288981	0.995
P18074	ERCC2	General transcription and DNA repair factor IIH helicase subunit XPD OS=Homo sapiens OX=9606 GN=ERCC2 PE=1 SV=1	10	6	6	6	86.9	0.834	0.894	1.153	0.955	0.907	0.876	1	1.07	1.099	530.3	442.6	474.1	611.6	506.3	480.9	464.4	530.4	567.4	582.6	1.01	0.232783	0.913	-0.549	0.504482	0.997
P18077	RPL35A	60S ribosomal protein L35a OS=Homo sapiens OX=9606 GN=RPL35A PE=1 SV=2	36	5	10	5	12.5	0.961	1.153	0.99	1.041	1.051	1.008	1.013	0.953	0.957	2312.9	2223.8	2666.2	2289.2	2406.6	2431.7	2330.7	2343.4	2203.9	2213.2	-0.61	0.357256	0.937	0.306	0.638751	0.997
P18084	ITGB5	Integrin beta-5 OS=Homo sapiens OX=9606 GN=ITGB5 PE=1 SV=1	1	1	1	1	88	1.283	1.212	0.824	1.233	1.158	1.028	1.163	0.872	0.676	72.3	92.7	87.6	59.6	89.2	83.7	74.3	84.1	63	48.9	-1.53	0.261848	0.921	0.703	0.597682	0.997
P18085	ARF4	ADP-ribosylation factor 4 OS=Homo sapiens OX=9606 GN=ARF4 PE=1 SV=3	12	2	8	1	20.5	0.959	1.073	0.984	0.994	0.981	1.054	0.957	0.902	1	555.9	532.9	596.4	547.3	552.8	545.2	586.2	532.2	501.4	556	-0.659	0.2952	0.928	0.225	0.71399	0.997
P18124	RPL7	60S ribosomal protein L7 OS=Homo sapiens OX=9606 GN=RPL7 PE=1 SV=1	23	6	16	6	29.2	1.034	1.076	1.049	1.021	0.984	1.043	1.012	0.968	0.996	2178.8	2252.6	2344.8	2285.5	2225.5	2143.7	2271.6	2205.7	2108.3	2170.9	-0.779	0.16038	0.884	-0.275	0.603717	0.997
P18206	VCL	Vinculin OS=Homo sapiens OX=9606 GN=VCL PE=1 SV=4	46	45	74	45	123.7	0.91	1.05	1.034	1.004	0.93	0.984	1.003	1.036	1.038	11524.9	10492.5	12105.1	11920.5	11574.5	10720.6	11334.9	11554.9	11937.2	11965.4	0.288	0.636952	0.96	-0.174	0.773789	0.997
P18440	NAT1	Arylamine N-acetyltransferase 1 OS=Homo sapiens OX=9606 GN=NAT1 PE=1 SV=2	18	3	3	3	33.9	0.774	1.254	0.922	0.986	1.14	1.157	1.189	1.024	1.186	161.3	124.8	202.2	148.7	159.1	183.8	186.6	191.8	165.1	191.3	1.59	0.163489	0.886	1.47	0.194221	0.994
P18615	NELFE	Negative elongation factor E OS=Homo sapiens OX=9606 GN=NELFE PE=1 SV=3	29	7	10	7	43.2	1.073	0.909	0.96	1.144	0.977	1.056	1.044	1.028	1.001	1089.4	1169.2	990.7	1046.2	1246.4	1064.6	1150.2	1137.1	1119.6	1090	0.407	0.574301	0.956	0.971	0.195889	0.994
P18621	RPL17	60S ribosomal protein L17 OS=Homo sapiens OX=9606 GN=RPL17 PE=1 SV=3	40	7	15	7	21.4	0.937	1.184	0.936	1.103	1.08	1.004	0.989	0.985	0.907	3895.2	3651.1	4610.2	3647	4296.7	4206.1	3911.2	3850.9	3835.4	3532.6	-0.508	0.508738	0.952	0.872	0.266563	0.995
P18669	PGAM1	Phosphoglycerate mutase 1 OS=Homo sapiens OX=9606 GN=PGAM1 PE=1 SV=2	48	9	25	6	28.8	1.037	0.959	0.998	0.997	1.066	1.005	1.032	0.964	0.939	2929.9	3039.5	2810.2	2925.2	2920.6	3124.2	2943.5	3023.6	2823.3	2750.6	-0.296	0.624483	0.959	0.383	0.528151	0.997
P18754	RCC1	Regulator of chromosome condensation OS=Homo sapiens OX=9606 GN=RCC1 PE=1 SV=1	16	5	8	5	44.9	1.005	0.892	0.923	1.055	0.947	0.97	1.048	1.015	0.987	938.8	943.2	837.1	866.4	990.7	889.3	910.7	983.8	953.1	926.7	0.788	0.229304	0.912	0.629	0.330867	0.996
P18827	SDC1	Syndecan-1 OS=Homo sapiens OX=9606 GN=SDC1 PE=1 SV=3	5	1	1	1	32.4	0.536	0.841	1.398	0.598	0.443	0.437	0.599	0.738	1.795	74.6	40	62.7	104.3	44.6	33.1	32.6	44.7	55.1	133.9	0.0145	0.993602	0.972	-2.68	0.159171	0.993
P18846	ATF1	Cyclic AMP-dependent transcription factor ATF-1 OS=Homo sapiens OX=9606 GN=ATF1 PE=1 SV=2	16	3	4	2	29.2	1.061	1.045	1.023	1.025	1.016	0.991	1.06	1.159	0.938	81.3	86.3	84.9	83.2	83.4	82.6	80.6	86.2	94.3	76.3	0.0149	0.982029	0.971	-0.254	0.702086	0.997
P18847	ATF3	Cyclic AMP-dependent transcription factor ATF-3 OS=Homo sapiens OX=9606 GN=ATF3 PE=1 SV=2	6	1	2	1	20.6	0.995	0.849	0.987	1.078	1.003	1.057	1.12	1.08	0.851	276	274.7	234.4	272.5	297.6	276.8	291.8	309.2	298.2	234.9	0.821	0.332443	0.934	1.28	0.144171	0.993
P18858	LIG1	DNA ligase 1 OS=Homo sapiens OX=9606 GN=LIG1 PE=1 SV=1	22	17	21	17	101.7	0.963	0.864	0.964	1.047	0.957	1.064	1.097	1.046	1.034	2465.9	2373.7	2129.7	2377.6	2582.2	2359.7	2623.4	2705.6	2580	2548.6	1.38	0.0462135	0.697	1.17	0.0826011	0.989
P18859	ATP5PF	ATP synthase-coupling factor 6, mitochondrial OS=Homo sapiens OX=9606 GN=ATP5PF PE=1 SV=1	18	1	2	1	12.6	0.814	0.364	1.231	0.768	0.368	0.822	0.631	0.88	0.926	137.2	111.7	50	168.9	105.4	50.5	112.8	86.7	120.8	127.1	-0.656	0.599426	0.958	-1.49	0.246113	0.995
P18887	XRCC1	DNA repair protein XRCC1 OS=Homo sapiens OX=9606 GN=XRCC1 PE=1 SV=2	5	3	3	3	69.4	0.911	0.753	0.831	0.822	0.808	0.937	0.869	0.852	0.945	208.4	189.9	157	173.2	171.3	168.4	195.2	181.1	177.5	196.8	0.302	0.619262	0.959	0.0834	0.890177	0.998
P19075	TSPAN8	Tetraspanin-8 OS=Homo sapiens OX=9606 GN=TSPAN8 PE=1 SV=1	4	1	1	1	26	0.839	0.705	0.599	1.276	0.779	1.379	1.209	0.902	1.259	67.1	56.3	47.3	40.2	85.6	52.2	92.5	81.1	60.5	84.5	3.22	0.0354545	0.634	3.4	0.0278745	0.977
P19174	PLCG1	1-phosphatidylinositol 4,5-bisphosphate phosphodiesterase gamma-1 OS=Homo sapiens OX=9606 GN=PLCG1 PE=1 SV=1	3	4	4	4	148.4	0.936	1.02	1.008	0.903	0.99	0.901	1.017	1.006	1.385	568.1	531.8	579.3	572.4	513.1	562.2	511.6	577.6	571.3	787	1.07	0.177647	0.893	-0.632	0.411359	0.996
P19338	NCL	Nucleolin OS=Homo sapiens OX=9606 GN=NCL PE=1 SV=3	6	5	5	5	76.6	0.794	0.503	0.765	1.03	0.523	0.849	0.785	0.99	0.901	58.4	46.3	29.3	44.7	60.1	30.5	49.6	45.8	57.8	52.6	1.21	0.210208	0.906	0.957	0.31364	0.995
P19367	HK1	Hexokinase-1 OS=Homo sapiens OX=9606 GN=HK1 PE=1 SV=3	33	29	50	26	102.4	0.76	0.981	1.244	0.811	0.957	0.869	0.793	1.166	1.097	6845.6	5199.6	6717.7	8514	5553.5	6551.3	5952.2	5428.7	7983.1	7506.6	0.22	0.856384	0.968	-1.18	0.340846	0.996
P19387	POLR2C	DNA-directed RNA polymerase II subunit RPB3 OS=Homo sapiens OX=9606 GN=POLR2C PE=1 SV=2	20	4	6	4	31.4	1.024	1.21	0.972	1.043	1.042	0.964	0.963	0.997	0.97	638.6	654	772.7	620.9	666	665.2	615.6	615.1	636.6	619.3	-0.963	0.164836	0.886	-0.262	0.692574	0.997
P19388	POLR2E	DNA-directed RNA polymerases I, II, and III subunit RPABC1 OS=Homo sapiens OX=9606 GN=POLR2E PE=1 SV=4	28	6	8	6	24.5	1.023	1.013	1.02	0.944	0.97	0.898	1.035	0.998	1.103	1398.1	1429.7	1415.9	1425.9	1319.7	1356.1	1256.1	1447.3	1395.5	1541.7	0.175	0.744133	0.964	-0.978	0.0906601	0.99
P19404	NDUFV2	NADH dehydrogenase [ubiquinone] flavoprotein 2, mitochondrial OS=Homo sapiens OX=9606 GN=NDUFV2 PE=1 SV=2	30	6	11	6	27.4	1.066	1.068	1.049	1	0.944	0.94	0.937	0.888	0.914	2328.8	2482.4	2486.6	2442.8	2329.7	2198.7	2189.3	2181	2066.9	2128.6	-1.78	0.00505616	0.209	-1.12	0.04752	0.984
P19447	ERCC3	General transcription and DNA repair factor IIH helicase subunit XPB OS=Homo sapiens OX=9606 GN=ERCC3 PE=1 SV=1	15	8	10	8	89.2	0.963	1.059	1.057	0.968	0.982	0.901	0.949	0.974	1.059	1011.7	974.2	1071.4	1069.1	979	993	911.3	959.9	985.6	1071.1	-0.49	0.415822	0.944	-0.827	0.182714	0.994
P19484	TFEB	Transcription factor EB OS=Homo sapiens OX=9606 GN=TFEB PE=1 SV=3	2	1	2	1	52.8	1.071	0.928	0.924	1.088	1.098	0.873	1.335	0.861	0.899	58.6	62.7	54.4	54.1	63.8	64.3	51.2	78.2	50.4	52.7	0.234	0.848116	0.968	0.579	0.636828	0.997
P19525	EIF2AK2	Interferon-induced, double-stranded RNA-activated protein kinase OS=Homo sapiens OX=9606 GN=EIF2AK2 PE=1 SV=2	23	10	13	10	62.1	0.972	0.844	1.07	0.87	0.933	0.919	0.851	1.05	1.176	1858.8	1807	1568.5	1988.6	1616.8	1733.4	1708	1581.4	1952.6	2186.2	0.41	0.639227	0.96	-0.735	0.406496	0.996
P19532	TFE3	Transcription factor E3 OS=Homo sapiens OX=9606 GN=TFE3 PE=1 SV=4	1	1	1	1	61.5	1.057	1.284	1.241	0.896	1.062	0.991	1.112	1.123	0.936	67.2	71.1	86.3	83.5	60.2	71.4	66.6	74.8	75.5	62.9	-1.05	0.223586	0.91	-1.79	0.0510138	0.985
P19623	SRM	Spermidine synthase OS=Homo sapiens OX=9606 GN=SRM PE=1 SV=1	29	7	12	7	33.8	1.053	1.158	1.127	0.979	1.086	0.984	0.921	0.959	1.054	1186.3	1249.4	1373.7	1337.4	1161.1	1288.3	1167.7	1092.7	1137.6	1250	-1.58	0.0252502	0.542	-0.881	0.1739	0.994
P19784	CSNK2A2	Casein kinase II subunit alpha' OS=Homo sapiens OX=9606 GN=CSNK2A2 PE=1 SV=1	11	3	3	3	41.2	1.056	0.856	0.964	1.042	0.894	0.955	0.863	0.914	0.958	341.8	360.9	292.6	329.6	356.1	305.6	326.4	294.9	312.3	327.3	-0.754	0.315832	0.931	0.033	0.964052	0.998
P19823	ITIH2	Inter-alpha-trypsin inhibitor heavy chain H2 OS=Homo sapiens OX=9606 GN=ITIH2 PE=1 SV=2	3	3	5	3	106.4	1.389	0.884	1.546	0.969	0.845	0.737	0.657	0.661	0.757	418.1	580.6	369.6	646.2	404.9	353.2	308	274.6	276.2	316.6	-4.16	0.00280118	0.128	-3.11	0.0149024	0.962
P19838	NFKB1	Nuclear factor NF-kappa-B p105 subunit OS=Homo sapiens OX=9606 GN=NFKB1 PE=1 SV=2	3	3	3	3	105.3	0.995	1.054	1.027	0.834	1.043	0.967	0.838	0.963	1.028	173.8	172.8	183.1	178.5	144.9	181.1	168	145.7	167.3	178.6	-1.06	0.188881	0.898	-0.791	0.315721	0.996
P20042	EIF2S2	Eukaryotic translation initiation factor 2 subunit 2 OS=Homo sapiens OX=9606 GN=EIF2S2 PE=1 SV=2	25	7	9	7	38.4	0.928	1.019	0.985	1.022	0.945	1.065	1.074	1.003	1.052	1865.7	1731.9	1901.5	1837.6	1906.6	1762.8	1986.6	2004.3	1871.5	1962.9	0.731	0.26978	0.922	0.555	0.395518	0.996
P20073	ANXA7	Annexin A7 OS=Homo sapiens OX=9606 GN=ANXA7 PE=1 SV=3	35	16	28	16	52.7	1.004	1.063	1.079	1.029	1.044	1.013	1.025	0.967	0.953	3860.3	3874.9	4103.3	4166.8	3973.3	4029.2	3911.9	3958.6	3732.7	3679.3	-0.8	0.16412	0.886	-0.0386	0.943717	0.998
P20248	CCNA2	Cyclin-A2 OS=Homo sapiens OX=9606 GN=CCNA2 PE=1 SV=2	12	4	4	4	48.5	1.119	0.909	0.796	1.199	1.082	1.211	1.126	0.903	0.792	522.3	584.2	474.8	415.9	626.2	565.1	632.5	588.2	471.6	413.6	-0.0389	0.971127	0.971	2.27	0.0554564	0.986
P20290	BTF3	Transcription factor BTF3 OS=Homo sapiens OX=9606 GN=BTF3 PE=1 SV=1	52	8	12	7	22.2	1.054	1.098	1.002	1.104	1.047	1.03	1.071	1.083	1.019	1782.3	1879.2	1957.8	1786.3	1967.7	1866	1835.1	1908.2	1930.3	1816.2	0.0465	0.934963	0.97	0.309	0.590683	0.997
P20336	RAB3A	Ras-related protein Rab-3A OS=Homo sapiens OX=9606 GN=RAB3A PE=1 SV=1	12	3	5	2	25	0.652	0.738	1.031	0.913	0.712	1.107	0.773	1.262	0.794	342.1	223.1	252.5	352.6	312.2	243.7	378.7	264.6	431.7	271.6	0.89	0.529219	0.954	0.811	0.565845	0.997
P20339	RAB5A	Ras-related protein Rab-5A OS=Homo sapiens OX=9606 GN=RAB5A PE=1 SV=2	24	4	4	2	23.6	0.712	0.74	0.896	1.002	0.771	0.969	0.849	1.013	0.902	118.2	84.2	87.5	105.9	118.4	91.2	114.6	100.4	119.8	106.7	1.01	0.208092	0.905	1.18	0.147082	0.993
P20340	RAB6A	Ras-related protein Rab-6A OS=Homo sapiens OX=9606 GN=RAB6A PE=1 SV=3	12	2	3	2	23.6	0.679	0.588	1.114	1.024	0.746	1.048	0.711	1.483	0.88	338.9	230	199.4	377.6	347.2	252.9	355.3	240.9	502.5	298.4	1.14	0.477641	0.95	1.07	0.502378	0.997
P20618	PSMB1	Proteasome subunit beta type-1 OS=Homo sapiens OX=9606 GN=PSMB1 PE=1 SV=2	32	6	9	6	26.5	1.011	1.021	1.043	0.957	1.076	0.999	1.011	1.027	0.982	1541.4	1558.4	1574.3	1607.9	1475.7	1659	1539.9	1558.3	1582.8	1513.7	-0.278	0.628843	0.959	-0.096	0.866772	0.998
P20645	M6PR	Cation-dependent mannose-6-phosphate receptor OS=Homo sapiens OX=9606 GN=M6PR PE=1 SV=1	8	2	2	2	31	0.971	1.204	1.033	1.143	1.043	1.159	0.989	1.002	0.917	305.9	297.1	368.3	315.9	349.5	318.9	354.5	302.5	306.5	280.5	-0.972	0.178865	0.893	0.818	0.252188	0.995
P20674	COX5A	Cytochrome c oxidase subunit 5A, mitochondrial OS=Homo sapiens OX=9606 GN=COX5A PE=1 SV=2	16	2	4	2	16.8	1.14	0.946	0.993	0.937	0.939	1.022	1.006	0.97	0.979	1225.6	1397.7	1159.7	1217.4	1148.8	1151.2	1252.4	1232.6	1188.3	1200.1	-0.541	0.451013	0.948	-0.647	0.370009	0.996
P20700	LMNB1	Lamin-B1 OS=Homo sapiens OX=9606 GN=LMNB1 PE=1 SV=2	52	27	53	25	66.4	1.122	1.053	0.947	1.072	1.028	1.12	0.898	0.817	0.762	8212.4	9215.9	8650.2	7773.7	8805.1	8445.8	9200.4	7377.4	6712.2	6256	-2.19	0.00718131	0.278	0.556	0.413188	0.996
P20810	CAST	Calpastatin OS=Homo sapiens OX=9606 GN=CAST PE=1 SV=4	37	16	22	16	76.5	0.858	0.759	0.925	1.172	0.654	1.089	1.171	1.062	1.044	3951.4	3390.7	2998	3655.4	4632.5	2584.2	4304.3	4626.9	4196.4	4125.5	2.44	0.0493572	0.712	1.66	0.159546	0.993
P20839	IMPDH1	Inosine-5'-monophosphate dehydrogenase 1 OS=Homo sapiens OX=9606 GN=IMPDH1 PE=1 SV=2	15	7	10	5	55.4	0.998	1.141	1.006	0.791	0.825	0.816	0.831	0.942	0.942	603.2	602.1	688.1	606.8	477.3	497.7	492.4	501.2	568.3	568	-1.63	0.0187138	0.453	-2.44	0.00180275	0.735
P20936	RASA1	Ras GTPase-activating protein 1 OS=Homo sapiens OX=9606 GN=RASA1 PE=1 SV=1	4	4	4	4	116.3	0.951	0.894	1.097	0.961	1.014	0.945	1.046	1.132	1.092	487.1	463.1	435.7	534.2	468.3	493.9	460.2	509.6	551.6	532	1.15	0.100412	0.833	-0.0417	0.949046	0.998
P20962	PTMS	Parathymosin OS=Homo sapiens OX=9606 GN=PTMS PE=1 SV=2	11	1	1	1	11.5	1.082	0.69	1.009	0.99	1.196	1.122	1.255	0.986	0.909	326.2	353	225.2	329.2	323.1	390	365.8	409.5	321.6	296.4	0.741	0.516573	0.953	1.56	0.187254	0.994
P21281	ATP6V1B2	V-type proton ATPase subunit B, brain isoform OS=Homo sapiens OX=9606 GN=ATP6V1B2 PE=1 SV=3	36	14	25	14	56.5	1.067	1.067	0.99	1.009	1.067	1.022	1.006	0.939	0.872	3482.5	3714.8	3714.6	3447.2	3513.1	3717.5	3558.5	3504	3268.8	3035.5	-1.17	0.0798064	0.8	0.0506	0.934468	0.998
P21283	ATP6V1C1	V-type proton ATPase subunit C 1 OS=Homo sapiens OX=9606 GN=ATP6V1C1 PE=1 SV=4	10	5	7	5	43.9	0.934	0.736	0.994	1.078	0.915	1.126	0.911	1.139	0.902	1525.9	1424.9	1123.1	1516	1644.9	1395.8	1717.8	1390.8	1738.4	1376.1	0.745	0.437673	0.946	1.6	0.113464	0.991
P21291	CSRP1	Cysteine and glycine-rich protein 1 OS=Homo sapiens OX=9606 GN=CSRP1 PE=1 SV=3	22	3	5	3	20.6	0.834	1.09	1.275	0.775	0.85	0.87	0.95	1.167	1.19	813.3	678.4	886.2	1037.2	630.5	690.9	707.2	772.9	949	967.9	0.381	0.707969	0.963	-2.23	0.0474962	0.984
P21333	FLNA	Filamin-A OS=Homo sapiens OX=9606 GN=FLNA PE=1 SV=4	28	57	77	53	280.6	0.835	1.057	1.151	0.855	0.83	0.806	0.978	1.222	1.246	10752.5	8975	11361.3	12376.3	9196.9	8927.3	8662	10519.5	13135.1	13396.7	1.09	0.242603	0.916	-1.92	0.0529856	0.986
P21359	NF1	Neurofibromin OS=Homo sapiens OX=9606 GN=NF1 PE=1 SV=2	2	7	8	7	319.2	0.815	0.797	1.125	0.833	0.756	0.893	0.822	1.122	1.133	600.1	489	478.2	675	499.8	453.9	535.6	493	673.5	680.2	0.954	0.380224	0.94	-0.96	0.377362	0.996
P21397	MAOA	Amine oxidase [flavin-containing] A OS=Homo sapiens OX=9606 GN=MAOA PE=1 SV=1	9	4	4	4	59.6	0.751	2.675	2.167	0.803	2.882	0.748	0.753	0.798	0.854	180.5	135.6	482.8	391.1	144.8	520.2	134.9	135.8	144	154.2	-4.13	0.0823329	0.805	-1.96	0.381213	0.996
P21399	ACO1	Cytoplasmic aconitate hydratase OS=Homo sapiens OX=9606 GN=ACO1 PE=1 SV=3	12	9	10	9	98.3	0.948	0.791	1.13	0.877	1.101	0.972	0.755	1.009	1.026	1453.3	1378.2	1149	1642.8	1274.1	1599.8	1412.8	1097.1	1466.9	1490.9	-0.379	0.717468	0.963	0.245	0.815028	0.997
P21709	EPHA1	Ephrin type-A receptor 1 OS=Homo sapiens OX=9606 GN=EPHA1 PE=1 SV=4	1	1	1	1	108.1	0.924	1.003	1.191	0.839	1.089	0.836	1.049	1.105	1.133	175.6	162.3	176.2	209.2	147.3	191.3	146.8	184.1	194	199	0.689	0.467169	0.949	-1.1	0.254945	0.995
P21796	VDAC1	Voltage-dependent anion-selective channel protein 1 OS=Homo sapiens OX=9606 GN=VDAC1 PE=1 SV=2	64	13	33	13	30.8	1.041	1.163	1.008	0.96	1.066	0.983	0.895	0.871	0.935	5494.8	5722.5	6387.7	5538.8	5275.4	5855.7	5403.6	4919.9	4788.6	5138.3	-1.93	0.00988435	0.337	-0.601	0.34604	0.996
P21860	ERBB3	Receptor tyrosine-protein kinase erbB-3 OS=Homo sapiens OX=9606 GN=ERBB3 PE=1 SV=1	2	2	2	2	148	1.293	1.169	1.281	1.231	1.205	1.296	1.398	1.11	0.865	147.2	190.2	172	188.5	181.2	177.3	190.7	205.8	163.4	127.2	-1.2	0.232964	0.913	0.218	0.822392	0.997
P21912	SDHB	Succinate dehydrogenase [ubiquinone] iron-sulfur subunit, mitochondrial OS=Homo sapiens OX=9606 GN=SDHB PE=1 SV=3	17	5	7	5	31.6	0.949	1.047	1.014	0.916	0.934	0.929	0.836	0.909	1.001	986.4	936.1	1032.5	1000.6	904	921.4	916.6	824.3	896.8	987.3	-1.07	0.10102	0.833	-0.887	0.16378	0.993
P21953	BCKDHB	2-oxoisovalerate dehydrogenase subunit beta, mitochondrial OS=Homo sapiens OX=9606 GN=BCKDHB PE=1 SV=2	2	1	1	1	43.1	1.085	1.239	1.163	1.061	1.112	0.981	1.158	1.125	1.153	207.3	225	256.8	241.1	220	230.5	203.4	240	233.2	239	-0.102	0.859384	0.968	-0.8	0.185831	0.994
P21964	COMT	Catechol O-methyltransferase OS=Homo sapiens OX=9606 GN=COMT PE=1 SV=2	6	2	7	2	30	1.126	1.281	0.777	1.227	1.215	1.363	1.078	0.654	0.781	2719	3060.7	3483.3	2111.8	3336.9	3303.6	3705.7	2930.6	1776.9	2123.8	-1.71	0.185557	0.896	1.88	0.149894	0.993
P21980	TGM2	Protein-glutamine gamma-glutamyltransferase 2 OS=Homo sapiens OX=9606 GN=TGM2 PE=1 SV=2	1	1	1	1	77.3	1.453	1.167	0.974	1.247	1.522	0.824	0.817	0.684	0.691	158.7	230.6	185.1	154.6	197.9	241.5	130.8	129.6	108.6	109.7	-3.73	0.0142752	0.394	-0.152	0.906834	0.998
P22033	MMUT	Methylmalonyl-CoA mutase, mitochondrial OS=Homo sapiens OX=9606 GN=MMUT PE=1 SV=4	27	17	22	17	83.1	0.972	0.916	0.953	1.061	1.078	1.068	1.094	0.942	0.886	4474.1	4346.7	4099.6	4264.7	4745.3	4823.8	4776.8	4896.1	4214.3	3963.3	0.322	0.647394	0.96	1.6	0.0412466	0.983
P22059	OSBP	Oxysterol-binding protein 1 OS=Homo sapiens OX=9606 GN=OSBP PE=1 SV=1	29	15	24	15	89.4	1.015	1.11	1.027	0.965	0.997	0.969	0.976	0.988	1.116	4390.3	4456	4871.8	4506.9	4238.3	4378.2	4255.7	4283.4	4335.8	4901	-0.41	0.481773	0.95	-0.759	0.205808	0.994
P22061	PCMT1	Protein-L-isoaspartate(D-aspartate) O-methyltransferase OS=Homo sapiens OX=9606 GN=PCMT1 PE=1 SV=4	11	3	3	3	24.6	0.904	0.901	0.713	0.808	0.912	0.771	0.928	0.788	0.808	842.1	761.1	758.3	600.6	680.2	767.6	649.1	781.7	663.6	680.6	-0.0694	0.914362	0.97	-0.253	0.695919	0.997
P22087	FBL	rRNA 2'-O-methyltransferase fibrillarin OS=Homo sapiens OX=9606 GN=FBL PE=1 SV=2	26	6	8	6	33.8	1.006	1.016	1.002	1.085	1.05	1.01	1.045	1.024	0.964	1027.6	1033.6	1043.7	1029.3	1114.6	1079.3	1037.5	1074.1	1052.2	990.4	8.93e-06	0.999987	0.972	0.642	0.259335	0.995
P22090	RPS4Y1	40S ribosomal protein S4, Y isoform 1 OS=Homo sapiens OX=9606 GN=RPS4Y1 PE=1 SV=2	31	9	13	5	29.4	1.041	0.925	0.94	1.04	1.02	1.01	0.827	1.01	1.007	2276.9	2370.2	2105.4	2141.1	2367.1	2322	2300.5	1883.9	2299.1	2292.9	-0.37	0.58698	0.957	0.753	0.27966	0.995
P22102	GART	Trifunctional purine biosynthetic protein adenosine-3 OS=Homo sapiens OX=9606 GN=GART PE=1 SV=1	23	22	35	22	107.7	1.091	1.02	0.924	0.984	0.949	0.98	1.003	0.959	0.98	6439	7021.9	6567.4	5949	6337.9	6109.7	6308	6460.4	6173.3	6309.4	-0.461	0.475636	0.95	-0.444	0.492356	0.997
P22234	PAICS	Multifunctional protein ADE2 OS=Homo sapiens OX=9606 GN=PAICS PE=1 SV=3	37	13	28	13	47	1.049	0.971	0.957	1.024	1.073	1.043	1.034	0.957	0.932	3997.3	4191.4	3880.5	3827.1	4091.6	4289.8	4169.3	4133.2	3826	3726.4	-0.268	0.666165	0.961	0.772	0.2296	0.995
P22304	IDS	Iduronate 2-sulfatase OS=Homo sapiens OX=9606 GN=IDS PE=1 SV=1	2	1	1	1	61.8	0.705	0.93	1.129	1.106	0.707	0.612	0.788	0.924	0.717	121	85.2	112.5	136.6	133.7	85.5	74.1	95.3	111.7	86.7	-1.15	0.372733	0.939	-0.693	0.584698	0.997
P22307	SCP2	Non-specific lipid-transfer protein OS=Homo sapiens OX=9606 GN=SCP2 PE=1 SV=2	26	12	19	12	59	0.928	1.005	0.94	1.043	1.151	1.087	0.953	0.868	1.004	2062.4	1913.3	2072.1	1938.9	2150.5	2374.3	2241.3	1965.4	1790.6	2069.9	-0.229	0.707842	0.963	1.72	0.0157555	0.963
P22314	UBA1	Ubiquitin-like modifier-activating enzyme 1 OS=Homo sapiens OX=9606 GN=UBA1 PE=1 SV=3	23	23	64	23	117.8	0.995	0.981	0.958	0.978	0.987	1.013	0.98	0.92	0.991	12170.6	12109.4	11943.7	11658.3	11908	12006.9	12329.8	11929.5	11195.8	12063.4	-0.263	0.622516	0.959	0.26	0.626646	0.997
P22392	NME2	Nucleoside diphosphate kinase B OS=Homo sapiens OX=9606 GN=NME2 PE=1 SV=1	59	9	31	1	17.3	0.819	0.921	1.079	0.96	0.927	1.014	0.79	1.027	0.976	1143.5	936.2	1052.8	1233.6	1097.9	1059.5	1159.2	903.7	1173.9	1116.4	-0.168	0.84463	0.968	0.307	0.721646	0.997
P22415	USF1	Upstream stimulatory factor 1 OS=Homo sapiens OX=9606 GN=USF1 PE=1 SV=1	5	2	2	1	33.5	0.908	0.998	1.026	0.94	1.059	0.981	1.034	0.957	0.977	151.5	137.6	151.2	155.5	142.5	160.5	148.7	156.7	145	148.1	0.115	0.864725	0.968	0.275	0.68406	0.997
P22570	FDXR	NADPH:adrenodoxin oxidoreductase, mitochondrial OS=Homo sapiens OX=9606 GN=FDXR PE=1 SV=3	12	5	9	5	53.8	0.891	1.391	1.437	0.902	0.937	0.878	0.96	0.952	1.271	1454.1	1295	2022.6	2088.9	1311.7	1361.9	1276.1	1396.5	1383.6	1848.8	-1.12	0.334138	0.934	-2.48	0.0475238	0.985
P22626	HNRNPA2B1	Heterogeneous nuclear ribonucleoproteins A2/B1 OS=Homo sapiens OX=9606 GN=HNRNPA2B1 PE=1 SV=2	63	16	64	15	37.4	1.071	0.964	0.98	1.014	1.102	1.034	1.088	0.971	1.016	6727.7	7206.3	6482.9	6594.1	6822.9	7412.6	6953.5	7316.8	6533.8	6832	0.128	0.847642	0.968	0.634	0.3531	0.996
P22670	RFX1	MHC class II regulatory factor RFX1 OS=Homo sapiens OX=9606 GN=RFX1 PE=1 SV=2	2	2	3	2	104.7	1.042	0.947	1.012	0.994	0.974	1.043	0.933	1.116	1.243	427.5	445.5	404.8	432.6	424.8	416.5	445.8	398.8	477.3	531.6	0.661	0.38556	0.941	0.112	0.880786	0.998
P22681	CBL	E3 ubiquitin-protein ligase CBL OS=Homo sapiens OX=9606 GN=CBL PE=1 SV=2	5	4	4	4	99.6	1.017	0.898	0.867	0.906	0.998	0.789	0.98	1.014	0.976	99.5	101.2	89.4	86.3	90.2	99.4	78.5	97.5	101	97.1	0.532	0.459772	0.948	-0.352	0.622213	0.997
P22695	UQCRC2	Cytochrome b-c1 complex subunit 2, mitochondrial OS=Homo sapiens OX=9606 GN=UQCRC2 PE=1 SV=3	34	12	29	12	48.4	1.042	1.175	1.007	1.048	1.02	1.045	0.984	0.924	0.984	3975.5	4143.9	4669.3	4005	4167.8	4054.4	4153.4	3913.5	3672.7	3911.8	-1.24	0.0556593	0.736	-0.111	0.850567	0.998
P22830	FECH	Ferrochelatase, mitochondrial OS=Homo sapiens OX=9606 GN=FECH PE=1 SV=2	21	9	12	9	47.8	0.974	1.012	1.135	0.958	1.041	0.963	0.972	0.949	1.131	1997.2	1944.9	2020.8	2266.2	1912.5	2078.7	1922.8	1942.1	1896.3	2259.6	-0.395	0.578897	0.957	-0.483	0.498625	0.997
P23193	TCEA1	Transcription elongation factor A protein 1 OS=Homo sapiens OX=9606 GN=TCEA1 PE=1 SV=2	39	10	15	8	33.9	1.064	1.071	0.978	1.062	1.111	1.071	1.132	0.987	0.968	1621.4	1725.4	1735.9	1585	1721.3	1801.6	1736.7	1834.8	1599.9	1569.5	-0.185	0.790366	0.966	0.673	0.344723	0.996
P23246	SFPQ	Splicing factor, proline- and glutamine-rich OS=Homo sapiens OX=9606 GN=SFPQ PE=1 SV=2	31	18	47	17	76.1	0.991	0.907	0.987	1.013	1.032	1.014	1.063	1.022	0.96	6163.6	6105.4	5588	6084	6240.8	6363.2	6249	6549.4	6298.2	5918.7	0.565	0.341441	0.935	0.797	0.18895	0.994
P23258	TUBG1	Tubulin gamma-1 chain OS=Homo sapiens OX=9606 GN=TUBG1 PE=1 SV=2	14	5	5	5	51.1	1.113	1.044	0.933	0.995	1.085	1.006	1.013	1.029	1.012	681	758.1	710.6	635	677.4	739	685.3	689.7	700.9	688.8	-0.198	0.766075	0.965	0.11	0.868297	0.998
P23284	PPIB	Peptidyl-prolyl cis-trans isomerase B OS=Homo sapiens OX=9606 GN=PPIB PE=1 SV=2	45	10	28	10	23.7	0.87	0.993	1.069	0.943	1.099	0.875	0.859	1.087	1.008	6835.4	5943.4	6785.3	7308.6	6448.8	7508.8	5982.8	5871.5	7433.1	6887.5	-0.0096	0.991797	0.972	-0.0309	0.973615	0.998
P23368	ME2	NAD-dependent malic enzyme, mitochondrial OS=Homo sapiens OX=9606 GN=ME2 PE=1 SV=1	15	8	8	7	65.4	1.006	1.045	1.12	0.948	0.969	0.952	0.91	0.866	0.922	1278.2	1286.2	1336.2	1431.2	1211.3	1238	1216.3	1163.4	1107.2	1179	-1.83	0.00519864	0.214	-1.12	0.0550527	0.986
P23378	GLDC	Glycine dehydrogenase (decarboxylating), mitochondrial OS=Homo sapiens OX=9606 GN=GLDC PE=1 SV=2	1	1	1	1	112.7	2.006	0.733	0.949	1.082	1.377	1.118	1.062	0.693	0.739	57	114.4	41.8	54.1	61.7	78.5	63.8	60.5	39.5	42.1	-1.73	0.275879	0.924	1.36	0.386905	0.996
P23381	WARS1	Tryptophan--tRNA ligase, cytoplasmic OS=Homo sapiens OX=9606 GN=WARS1 PE=1 SV=2	23	9	13	9	53.1	0.999	1.069	0.906	0.945	1.054	0.987	0.948	0.947	0.877	1887.9	1885.1	2017.4	1711.2	1784	1990.5	1864.2	1789.8	1787.3	1655	-0.814	0.237125	0.914	0.119	0.857536	0.998
P23396	RPS3	40S ribosomal protein S3 OS=Homo sapiens OX=9606 GN=RPS3 PE=1 SV=2	80	18	62	18	26.7	1.027	0.981	0.97	0.994	0.958	1.003	0.945	0.987	0.969	9881.2	10143.3	9696.6	9586.1	9820.3	9468.7	9907	9340.2	9751.8	9571.8	-0.44	0.402006	0.943	-0.0256	0.960358	0.998
P23434	GCSH	Glycine cleavage system H protein, mitochondrial OS=Homo sapiens OX=9606 GN=GCSH PE=1 SV=2	17	2	5	2	18.9	1.116	0.948	1.053	0.991	0.971	0.852	0.866	1.033	1.102	701.8	782.8	665.5	738.8	695.5	681.7	598.2	607.6	724.8	773	-0.631	0.442377	0.947	-1.13	0.182709	0.994
P23511	NFYA	Nuclear transcription factor Y subunit alpha OS=Homo sapiens OX=9606 GN=NFYA PE=1 SV=2	5	1	1	1	36.9	1.114	0.968	1.008	1.027	0.955	0.98	1.059	1.05	1.007	113.6	126.5	109.9	114.5	116.6	108.5	111.4	120.3	119.3	114.4	0.051	0.935568	0.97	-0.408	0.52266	0.997
P23526	AHCY	Adenosylhomocysteinase OS=Homo sapiens OX=9606 GN=AHCY PE=1 SV=4	35	15	35	15	47.7	1.051	0.963	0.921	1.015	1.087	1.058	0.886	0.908	0.924	7073.6	7433.6	6811.1	6514.5	7176.4	7688.5	7480.4	6268	6422.8	6532.7	-0.966	0.126908	0.861	0.985	0.120479	0.992
P23528	CFL1	Cofilin-1 OS=Homo sapiens OX=9606 GN=CFL1 PE=1 SV=3	47	7	29	5	18.5	0.999	0.991	0.889	1.003	0.996	1.035	1.002	0.897	0.981	2728.9	2727	2704	2427.1	2737.4	2718	2823.8	2734.1	2446.9	2677.1	-0.0871	0.888709	0.969	0.699	0.275933	0.995
P23588	EIF4B	Eukaryotic translation initiation factor 4B OS=Homo sapiens OX=9606 GN=EIF4B PE=1 SV=2	25	13	42	13	69.1	1.106	0.966	0.919	1.029	0.903	1.013	1.049	1.005	0.997	5452.1	6029.8	5266.2	5012.5	5610.9	4921.8	5522.3	5720.8	5480.6	5436.8	0.158	0.83339	0.967	-0.082	0.913134	0.998
P23743	DGKA	Diacylglycerol kinase alpha OS=Homo sapiens OX=9606 GN=DGKA PE=1 SV=3	12	7	8	7	82.6	1.043	1.281	0.777	1.618	1.496	1.371	1.424	0.74	0.743	432.9	451.7	554.6	336.3	700.3	647.8	593.4	616.4	320.3	321.8	-0.716	0.629633	0.959	2.99	0.0640476	0.987
P23786	CPT2	Carnitine O-palmitoyltransferase 2, mitochondrial OS=Homo sapiens OX=9606 GN=CPT2 PE=1 SV=2	30	17	21	17	73.7	0.947	1.084	1.085	0.903	1.02	0.925	1.012	0.977	1.128	4152.5	3933.5	4501	4507.1	3751.7	4235.3	3840.8	4203	4057.2	4684.8	-0.076	0.914977	0.97	-0.947	0.202151	0.994
P23919	DTYMK	Thymidylate kinase OS=Homo sapiens OX=9606 GN=DTYMK PE=1 SV=4	54	12	14	12	23.8	1.155	1.028	0.824	1.08	1.201	1.133	0.937	0.889	0.812	2430.5	2806.6	2497.3	2003.7	2626	2919.9	2754.5	2277.5	2160	1974.5	-1.4	0.119239	0.854	1.49	0.0985684	0.991
P23921	RRM1	Ribonucleoside-diphosphate reductase large subunit OS=Homo sapiens OX=9606 GN=RRM1 PE=1 SV=1	27	17	33	17	90	0.891	0.969	1.048	0.947	1.038	1.006	0.97	1.031	1.051	7076.1	6301.6	6857.4	7417.5	6703.4	7348.3	7119	6866.8	7293.4	7439.6	0.459	0.480218	0.95	0.425	0.512326	0.997
P24311	COX7B	Cytochrome c oxidase subunit 7B, mitochondrial OS=Homo sapiens OX=9606 GN=COX7B PE=1 SV=2	9	1	1	1	9.2	0.977	0.996	1.11	0.942	1.155	1.054	1.096	0.868	0.944	572.9	559.7	570.6	635.9	539.5	661.9	603.7	628.1	497.4	541	-0.621	0.498304	0.952	0.323	0.722322	0.997
P24385	CCND1	G1/S-specific cyclin-D1 OS=Homo sapiens OX=9606 GN=CCND1 PE=1 SV=1	22	5	5	5	33.7	1.151	1.156	1.048	1.092	1.03	1.084	1	0.729	0.878	641.7	738.9	741.4	672.2	700.8	660.8	695.8	641.3	467.6	563.3	-2.41	0.00659894	0.261	-0.229	0.752946	0.997
P24386	CHM	Rab proteins geranylgeranyltransferase component A 1 OS=Homo sapiens OX=9606 GN=CHM PE=1 SV=3	14	7	7	7	73.4	0.921	0.932	0.96	0.933	0.969	0.916	0.991	0.991	1.168	923	850	860.5	886.1	861.5	894.6	845.6	915	915	1078.2	1.09	0.0864008	0.812	0.0199	0.97311	0.998
P24534	EEF1B2	Elongation factor 1-beta OS=Homo sapiens OX=9606 GN=EEF1B2 PE=1 SV=3	34	7	19	6	24.7	1.068	1.119	1.005	0.889	0.851	0.867	0.926	0.981	0.98	3720.6	3972.6	4162.1	3739.5	3308.1	3166.9	3227.5	3446.1	3648.6	3646.9	-1.27	0.0349367	0.63	-2.2	0.0017413	0.726
P24539	ATP5PB	ATP synthase F(0) complex subunit B1, mitochondrial OS=Homo sapiens OX=9606 GN=ATP5PB PE=1 SV=2	36	9	15	9	28.9	0.992	1.124	1.064	0.917	0.917	0.89	0.882	1.006	1.086	2474.5	2455.8	2782	2633.8	2268	2269	2202.5	2183.2	2488.9	2686.1	-0.884	0.19634	0.901	-1.71	0.0227814	0.973
P24666	ACP1	Low molecular weight phosphotyrosine protein phosphatase OS=Homo sapiens OX=9606 GN=ACP1 PE=1 SV=3	32	4	5	4	18	1.055	1.034	0.919	1.043	1.116	1.005	0.979	0.976	0.955	357.5	377.2	369.8	328.5	373	399.2	359.2	350.2	348.8	341.6	-0.496	0.434461	0.946	0.711	0.270019	0.995
P24752	ACAT1	Acetyl-CoA acetyltransferase, mitochondrial OS=Homo sapiens OX=9606 GN=ACAT1 PE=1 SV=1	39	13	26	13	45.2	0.893	1.161	1.028	0.914	1.117	0.909	1.013	1.009	1.177	3041.7	2716.4	3530.7	3127.9	2780.8	3397.6	2765.1	3082.3	3070.5	3579	0.394	0.671072	0.961	-0.411	0.657289	0.997
P24821	TNC	Tenascin OS=Homo sapiens OX=9606 GN=TNC PE=1 SV=3	0	1	1	1	240.7	0.877	1.019	1.204	0.884	1.004	0.902	1.011	1.055	1.439	623.2	546.6	635.3	750.1	551	625.6	562.4	630.1	657.4	896.6	0.93	0.34003	0.935	-1.01	0.304477	0.995
P24863	CCNC	Cyclin-C OS=Homo sapiens OX=9606 GN=CCNC PE=1 SV=2	4	1	1	1	33.2	1.307	2.132	1.267	1.419	1.805	2.249	1.563	1.645	1.752	8.6	11.2	18.3	10.9	12.2	15.5	19.4	13.4	14.2	15.1	0.492	0.462144	0.949	0.914	0.185694	0.994
P24928	POLR2A	DNA-directed RNA polymerase II subunit RPB1 OS=Homo sapiens OX=9606 GN=POLR2A PE=1 SV=2	11	17	17	17	217	1.021	0.951	1.081	1.012	0.975	0.994	1.07	0.99	1	2616.7	2671.8	2489	2829.6	2649	2550.1	2600.1	2800.9	2591.4	2616	-0.0455	0.940262	0.97	-0.189	0.75551	0.997
P24941	CDK2	Cyclin-dependent kinase 2 OS=Homo sapiens OX=9606 GN=CDK2 PE=1 SV=2	33	8	13	7	33.9	0.956	0.912	0.957	1.03	0.992	1.022	1.001	1.025	1.01	1777.7	1699.4	1620.6	1701.4	1831.6	1762.7	1817.3	1779.9	1822.3	1794.7	0.741	0.150555	0.878	1	0.0618191	0.987
P25098	GRK2	Beta-adrenergic receptor kinase 1 OS=Homo sapiens OX=9606 GN=GRK2 PE=1 SV=2	14	7	8	7	79.5	1.028	1.214	0.952	1.051	1.03	1.043	1.042	0.895	0.877	459.6	472.3	557.8	437.7	483.2	473.3	479.5	479	411.5	403	-1.19	0.151366	0.879	0.133	0.865772	0.998
P25205	MCM3	DNA replication licensing factor MCM3 OS=Homo sapiens OX=9606 GN=MCM3 PE=1 SV=3	34	24	44	24	90.9	1.06	1.025	0.874	1.071	1.1	1.077	1.067	0.96	0.93	5040.5	5343.8	5167.3	4404.6	5396.1	5542.7	5430.1	5378.2	4838.6	4685.9	-0.0984	0.895075	0.969	1.22	0.123959	0.992
P25311	AZGP1	Zinc-alpha-2-glycoprotein OS=Homo sapiens OX=9606 GN=AZGP1 PE=1 SV=2	20	5	5	5	34.2	0.737	1.26	1.006	0.795	1.091	0.855	1.469	0.901	1.762	723.6	533.3	911.7	728.1	575.3	789.4	618.8	1062.9	651.6	1275.2	1.89	0.23204	0.913	-0.745	0.627449	0.997
P25325	MPST	3-mercaptopyruvate sulfurtransferase OS=Homo sapiens OX=9606 GN=MPST PE=1 SV=3	18	5	5	5	33.2	0.775	0.972	1.085	0.705	0.875	0.675	0.586	1.039	1.243	1000.1	774.9	971.9	1085.6	704.8	875.4	675.5	586.5	1039.3	1243.4	0.2	0.870872	0.968	-1.73	0.178811	0.994
P25398	RPS12	40S ribosomal protein S12 OS=Homo sapiens OX=9606 GN=RPS12 PE=1 SV=3	27	3	6	3	14.5	1.03	0.896	0.985	0.958	0.893	0.942	0.903	0.995	0.949	1694.5	1745.3	1517.6	1668.9	1623.2	1512.6	1595.5	1530.8	1685.4	1608.3	-0.427	0.473808	0.95	-0.522	0.384443	0.996
P25490	YY1	Transcriptional repressor protein YY1 OS=Homo sapiens OX=9606 GN=YY1 PE=1 SV=2	14	6	7	6	44.7	1.083	1.003	1.028	1.206	1.125	1.223	1.142	1.112	1.025	894.2	968.6	897.2	918.9	1078.4	1006	1093.7	1021.1	994.2	916.3	0.488	0.433783	0.946	1.48	0.0329275	0.98
P25685	DNAJB1	DnaJ homolog subfamily B member 1 OS=Homo sapiens OX=9606 GN=DNAJB1 PE=1 SV=4	26	9	12	9	38	0.936	1.009	1.006	1.037	1.047	0.991	0.954	0.965	0.926	2995	2804.6	3021.9	3013.1	3105.3	3134.4	2967.1	2858.1	2890.6	2773.5	-0.464	0.385716	0.941	0.672	0.218309	0.994
P25686	DNAJB2	DnaJ homolog subfamily B member 2 OS=Homo sapiens OX=9606 GN=DNAJB2 PE=1 SV=3	12	3	3	3	35.6	0.923	1.09	1.191	0.833	0.783	0.821	0.961	1.105	1	464	428.3	505.6	552.5	386.6	363.1	380.7	446	512.9	464	-0.429	0.572262	0.956	-2.53	0.00622481	0.917
P25705	ATP5F1A	ATP synthase subunit alpha, mitochondrial OS=Homo sapiens OX=9606 GN=ATP5F1A PE=1 SV=1	40	21	88	21	59.7	1.014	1.099	1.05	0.928	0.914	0.924	0.915	0.998	0.993	19798.3	20075.9	21749.2	20787.8	18378.3	18104	18286.2	18105.6	19753	19661.4	-1.09	0.0560235	0.738	-1.53	0.0126874	0.956
P25786	PSMA1	Proteasome subunit alpha type-1 OS=Homo sapiens OX=9606 GN=PSMA1 PE=1 SV=1	47	13	28	13	29.5	0.985	1.059	1.003	0.969	1.052	0.998	0.988	1.069	0.946	5084.6	5006.9	5385	5100.9	4928.4	5350.1	5073.3	5024.2	5433.5	4807.8	-0.196	0.744117	0.964	0.0144	0.9809	0.998
P25787	PSMA2	Proteasome subunit alpha type-2 OS=Homo sapiens OX=9606 GN=PSMA2 PE=1 SV=2	29	5	5	5	25.9	1.022	1.097	1.027	0.893	1.082	0.979	0.966	1.037	1.002	911.1	930.8	1000	935.5	814	986.1	891.7	880.3	944.7	912.5	-0.618	0.374132	0.94	-0.669	0.338024	0.996
P25788	PSMA3	Proteasome subunit alpha type-3 OS=Homo sapiens OX=9606 GN=PSMA3 PE=1 SV=2	27	7	10	7	28.4	1.014	1.053	1.035	0.936	1.051	0.982	0.973	1.086	1.012	1999.8	2027.6	2105.6	2070.3	1872.8	2101.9	1962.8	1946.6	2172.2	2024.6	-0.223	0.711964	0.963	-0.457	0.453402	0.996
P25789	PSMA4	Proteasome subunit alpha type-4 OS=Homo sapiens OX=9606 GN=PSMA4 PE=1 SV=1	18	5	9	5	29.5	1.013	1.027	1.177	0.952	1.056	0.986	0.878	0.924	0.915	1587.9	1609.1	1631.2	1868.9	1511.9	1676.5	1565.4	1393.6	1467	1453.5	-1.9	0.0101861	0.342	-0.68	0.286235	0.995
P25815	S100P	Protein S100-P OS=Homo sapiens OX=9606 GN=S100P PE=1 SV=2	42	3	12	3	10.4	0.608	1.257	0.102	2.354	2.022	2.273	0.902	0.081	0.08	1689.3	1027	2124	172.4	3976.6	3416.1	3839.6	1524.3	137.1	135.6	-1.4	0.337624	0.935	6.16	0.0012597	0.636
P26045	PTPN3	Tyrosine-protein phosphatase non-receptor type 3 OS=Homo sapiens OX=9606 GN=PTPN3 PE=1 SV=2	1	1	1	1	103.9	0.901	1.05	1.041	1	1.08	0.837	0.874	1.059	1.221	72.1	65	75.7	75.1	72.1	77.9	60.4	63.1	76.4	88.1	0.323	0.744885	0.964	-0.136	0.891057	0.998
P26196	DDX6	Probable ATP-dependent RNA helicase DDX6 OS=Homo sapiens OX=9606 GN=DDX6 PE=1 SV=2	30	11	17	11	54.4	0.977	1.024	0.928	1.05	1.032	1.041	1.084	0.969	1.083	2625.2	2564	2688.9	2436.5	2755.8	2708.6	2733.2	2844.9	2543.6	2843.9	0.709	0.265995	0.922	0.954	0.143904	0.993
P26358	DNMT1	DNA (cytosine-5)-methyltransferase 1 OS=Homo sapiens OX=9606 GN=DNMT1 PE=1 SV=2	16	21	24	21	183.1	1.075	0.782	0.83	1.052	0.851	1.031	1.096	1.092	1.006	2136	2296.6	1670.1	1772.8	2247.2	1817	2202.2	2341.2	2331.9	2148.1	1.57	0.121593	0.856	0.801	0.407756	0.996
P26368	U2AF2	Splicing factor U2AF 65 kDa subunit OS=Homo sapiens OX=9606 GN=U2AF2 PE=1 SV=4	20	5	9	5	53.5	1.008	0.702	0.755	0.975	0.643	1.046	1.05	0.952	0.982	994.7	1002.8	698.7	751.5	970.1	639.5	1040.7	1044.8	946.5	977	1.33	0.21339	0.907	0.665	0.520685	0.997
P26373	RPL13	60S ribosomal protein L13 OS=Homo sapiens OX=9606 GN=RPL13 PE=1 SV=4	36	7	15	7	24.2	1.085	1.198	1.009	1.014	1.029	0.981	1.069	0.952	1.065	1350.1	1464.8	1617.7	1362.8	1369.1	1389.1	1324.4	1443.5	1285.7	1438.1	-0.707	0.302932	0.929	-0.732	0.287022	0.995
P26440	IVD	Isovaleryl-CoA dehydrogenase, mitochondrial OS=Homo sapiens OX=9606 GN=IVD PE=1 SV=2	30	12	18	12	46.6	1.17	1.253	1.031	1.015	0.974	0.882	1.145	0.91	1.03	2537.1	2968.7	3177.9	2614.6	2576.3	2470	2237.9	2905.5	2308.7	2611.9	-1.16	0.193003	0.9	-1.81	0.0545672	0.986
P26572	MGAT1	Alpha-1,3-mannosyl-glycoprotein 2-beta-N-acetylglucosaminyltransferase OS=Homo sapiens OX=9606 GN=MGAT1 PE=1 SV=2	2	1	1	1	50.8	0.947	1.137	1.028	0.852	0.911	0.929	0.827	1.298	1.135	90.4	85.6	102.8	92.9	77	82.3	83.9	74.7	117.3	102.6	0.204	0.841564	0.968	-1.5	0.161383	0.993
P26583	HMGB2	High mobility group protein B2 OS=Homo sapiens OX=9606 GN=HMGB2 PE=1 SV=2	17	3	5	2	24	1.187	0.667	0.774	1.246	1.096	1.4	1.068	0.671	0.626	295.8	351.2	197.4	229.1	368.6	324.2	414.2	316	198.5	185.2	-0.562	0.674144	0.961	3.06	0.0398986	0.982
P26599	PTBP1	Polypyrimidine tract-binding protein 1 OS=Homo sapiens OX=9606 GN=PTBP1 PE=1 SV=1	24	9	26	7	57.2	0.945	1.045	1.149	0.894	1.006	0.904	0.985	1.111	1.028	1102.6	1042	1151.7	1267.3	985.9	1109.1	996.8	1086.5	1225.2	1133	-0.0472	0.94793	0.97	-1.17	0.126819	0.992
P26639	TARS1	Threonine--tRNA ligase 1, cytoplasmic OS=Homo sapiens OX=9606 GN=TARS1 PE=1 SV=3	33	23	31	22	83.4	1.184	1.016	0.958	1.058	0.987	1.067	1.094	0.969	0.854	5742.6	6799.7	5835.1	5503.7	6075.5	5669.9	6128	6283	5562	4906.4	-0.776	0.38456	0.941	0.0866	0.921204	0.998
P26640	VARS1	Valine--tRNA ligase OS=Homo sapiens OX=9606 GN=VARS1 PE=1 SV=4	25	27	55	27	140.4	0.926	1.076	1.028	1.081	1.079	1.043	0.994	1.007	0.941	8729.8	8088.2	9394.2	8971	9440.6	9423.5	9103.1	8674.9	8790.4	8212.2	-0.329	0.586557	0.957	0.923	0.145683	0.993
P26641	EEF1G	Elongation factor 1-gamma OS=Homo sapiens OX=9606 GN=EEF1G PE=1 SV=3	33	14	34	14	50.1	1.078	1.099	1.06	0.912	0.928	0.896	0.997	1.039	1.074	7423.9	8000.7	8156.6	7872.2	6769.4	6890.7	6651	7404.2	7714.3	7976	-0.568	0.260926	0.92	-1.95	0.00214929	0.775
P26885	FKBP2	Peptidyl-prolyl cis-trans isomerase FKBP2 OS=Homo sapiens OX=9606 GN=FKBP2 PE=1 SV=2	15	2	2	2	15.6	1.027	1.101	0.994	0.949	1.17	0.969	0.984	1.211	1.103	521.1	535.2	573.8	518	494.6	609.7	504.8	512.7	631.1	574.9	0.422	0.601089	0.958	-0.15	0.852099	0.998
P27144	AK4	Adenylate kinase 4, mitochondrial OS=Homo sapiens OX=9606 GN=AK4 PE=1 SV=1	26	6	9	6	25.3	0.891	0.979	0.998	1.214	1.039	1.129	1.029	0.982	1.014	2213.3	1972.4	2167.8	2208.8	2687.5	2299.5	2498.9	2276.6	2173.2	2243.3	0.563	0.384254	0.941	2	0.00879994	0.94
P27169	PON1	Serum paraoxonase/arylesterase 1 OS=Homo sapiens OX=9606 GN=PON1 PE=1 SV=3	7	2	2	2	39.7	0.656	1.072	1.51	0.778	0.652	0.791	0.614	1.208	0.676	284.8	186.9	305.2	430.1	221.6	185.7	225.4	175	344.1	192.5	-1.54	0.333222	0.934	-2.71	0.102261	0.991
P27348	YWHAQ	14-3-3 protein theta OS=Homo sapiens OX=9606 GN=YWHAQ PE=1 SV=1	40	9	42	4	27.7	0.994	1.017	1.019	0.918	1.026	0.982	0.908	1.1	1.096	715.1	710.6	727.4	728.8	656.6	733.4	702.2	649.4	786.5	783.7	0.097	0.889753	0.969	-0.353	0.616103	0.997
P27361	MAPK3	Mitogen-activated protein kinase 3 OS=Homo sapiens OX=9606 GN=MAPK3 PE=1 SV=4	22	7	12	4	43.1	0.958	1.089	1.064	0.968	1.042	0.971	1.009	1.012	1.043	1153.4	1104.4	1255.9	1226.9	1116.9	1202.2	1119.4	1164.1	1166.9	1203.3	-0.196	0.740962	0.964	-0.36	0.545941	0.997
P27449	ATP6V0C	V-type proton ATPase 16 kDa proteolipid subunit OS=Homo sapiens OX=9606 GN=ATP6V0C PE=1 SV=1	5	1	1	1	15.7	0.706	0.822	0.969	1.046	0.909	1.174	0.969	1.137	0.997	105.1	74.2	86.4	101.9	110	95.6	123.5	101.9	119.5	104.8	1.81	0.0653888	0.767	2.08	0.0389025	0.982
P27540	ARNT	Aryl hydrocarbon receptor nuclear translocator OS=Homo sapiens OX=9606 GN=ARNT PE=1 SV=1	7	4	4	4	86.6	1.058	0.965	1.056	1.025	1.018	0.879	0.974	0.926	1.093	135.3	143.1	130.6	142.8	138.7	137.7	118.9	131.7	125.3	147.9	-0.524	0.473306	0.95	-0.544	0.457581	0.996
P27635	RPL10	60S ribosomal protein L10 OS=Homo sapiens OX=9606 GN=RPL10 PE=1 SV=4	29	6	12	6	24.6	0.937	1.242	0.989	1.08	1.153	0.996	1.073	1.025	1.103	4349.9	4075.7	5400.4	4302.9	4696.5	5014.3	4330.6	4665.8	4459.3	4797.8	0.354	0.656566	0.961	0.654	0.416102	0.996
P27694	RPA1	Replication protein A 70 kDa DNA-binding subunit OS=Homo sapiens OX=9606 GN=RPA1 PE=1 SV=2	36	17	28	17	68.1	1.137	0.948	0.851	1.106	1.125	1.136	1.078	0.858	0.836	4620.8	5255.3	4380.9	3931.1	5112.8	5198.8	5249.8	4982.6	3966.8	3862.1	-0.534	0.582708	0.957	1.69	0.102696	0.991
P27695	APEX1	DNA-(apurinic or apyrimidinic site) endonuclease OS=Homo sapiens OX=9606 GN=APEX1 PE=1 SV=2	28	7	13	7	35.5	0.988	0.938	0.99	1.023	1.051	0.977	0.968	0.976	0.972	1773	1750.9	1663.8	1754.6	1813.7	1862.6	1732.9	1717	1729.8	1723.9	-0.115	0.820399	0.967	0.648	0.219774	0.994
P27707	DCK	Deoxycytidine kinase OS=Homo sapiens OX=9606 GN=DCK PE=1 SV=1	9	2	6	2	30.5	1.061	1.017	1.011	1.08	1.156	1.02	1.016	1.061	0.835	499.6	529.9	508.1	505.3	539.4	577.7	509.7	507.8	529.9	417.3	-0.605	0.399655	0.943	0.722	0.318511	0.996
P27708	CAD	CAD protein OS=Homo sapiens OX=9606 GN=CAD PE=1 SV=3	17	29	41	29	242.8	0.891	0.883	0.988	0.915	0.935	0.934	0.938	1.039	1.116	5358.1	4771.9	4732.3	5296	4904.6	5008.8	5005.5	5024.4	5564.6	5980.3	1.06	0.104852	0.838	0.0283	0.963189	0.998
P27797	CALR	Calreticulin OS=Homo sapiens OX=9606 GN=CALR PE=1 SV=1	38	11	25	11	48.1	0.965	0.53	0.904	1.068	0.596	1.067	1.007	0.982	0.945	5951	5743.7	3151.8	5379	6354.9	3546.9	6348.8	5991.3	5845.4	5623.4	1.19	0.294252	0.927	1.17	0.301003	0.995
P27815	PDE4A	cAMP-specific 3',5'-cyclic phosphodiesterase 4A OS=Homo sapiens OX=9606 GN=PDE4A PE=1 SV=3	2	1	1	1	98.1	0.921	0.796	0.929	0.943	0.902	0.834	0.977	0.732	0.579	23.4	21.6	18.6	21.8	22.1	21.1	19.5	22.9	17.1	13.6	-0.575	0.44818	0.947	-0.000789	0.999158	0.998
P27816	MAP4	Microtubule-associated protein 4 OS=Homo sapiens OX=9606 GN=MAP4 PE=1 SV=3	42	41	75	41	120.9	0.915	0.944	1.143	0.914	0.847	0.876	1.084	1.11	1.064	15887.9	14541.3	14994.6	18157.9	14521.5	13460.1	13924.6	17224.1	17642	16909.8	0.995	0.170889	0.89	-1.31	0.0813733	0.989
P27824	CANX	Calnexin OS=Homo sapiens OX=9606 GN=CANX PE=1 SV=2	9	5	7	5	67.5	0.783	0.503	0.709	1.142	0.61	1.103	0.835	1.292	1.03	897.3	702.4	451.3	636.5	1024.7	547.1	989.4	749.2	1159.5	923.9	2.73	0.0603673	0.752	2.58	0.0731183	0.989
P28066	PSMA5	Proteasome subunit alpha type-5 OS=Homo sapiens OX=9606 GN=PSMA5 PE=1 SV=3	17	3	9	3	26.4	0.987	1.03	0.977	1	0.995	1.024	1.026	1.082	1.008	1433.3	1413.9	1475.9	1400	1433.6	1425.7	1468	1470.7	1550.5	1444	0.433	0.41885	0.945	0.239	0.652069	0.997
P28070	PSMB4	Proteasome subunit beta type-4 OS=Homo sapiens OX=9606 GN=PSMB4 PE=1 SV=4	39	7	16	7	29.2	1.018	1.069	0.985	0.996	1.068	1.003	0.985	1.007	0.941	2096	2132.7	2240.1	2063.6	2087.9	2238	2102.3	2064.7	2110	1971.6	-0.588	0.303108	0.929	0.119	0.830436	0.998
P28072	PSMB6	Proteasome subunit beta type-6 OS=Homo sapiens OX=9606 GN=PSMB6 PE=1 SV=4	17	4	10	4	25.3	1.06	1.134	1.041	1.02	1.118	1.005	1.081	1.075	1.074	2061.9	2185.2	2338.4	2146.8	2103.5	2304.6	2072.2	2228.4	2215.8	2215	-0.0323	0.954059	0.971	-0.173	0.758758	0.997
P28074	PSMB5	Proteasome subunit beta type-5 OS=Homo sapiens OX=9606 GN=PSMB5 PE=1 SV=3	48	10	21	10	28.5	1.011	1.032	0.994	0.978	1.03	0.999	0.964	0.997	0.951	2804.6	2836.1	2895.1	2789.2	2742.9	2889.4	2802.7	2703.4	2796.3	2666.1	-0.58	0.268091	0.922	-0.0167	0.973776	0.998
P28288	ABCD3	ATP-binding cassette sub-family D member 3 OS=Homo sapiens OX=9606 GN=ABCD3 PE=1 SV=1	12	8	9	8	75.4	0.884	0.96	1.055	0.988	0.889	1.033	0.976	1.175	1.106	977.2	863.9	937.7	1031	965.2	868.4	1009.5	954	1147.9	1081.1	1.16	0.153756	0.88	0.155	0.840395	0.998
P28331	NDUFS1	NADH-ubiquinone oxidoreductase 75 kDa subunit, mitochondrial OS=Homo sapiens OX=9606 GN=NDUFS1 PE=1 SV=3	33	20	32	20	79.4	1.1	1.132	1.134	0.995	0.878	0.92	0.925	0.871	1.026	2950	3246.2	3339	3346.6	2935.3	2591.4	2713	2730.1	2568.7	3027	-2.07	0.0060213	0.243	-2.04	0.0065186	0.921
P28340	POLD1	DNA polymerase delta catalytic subunit OS=Homo sapiens OX=9606 GN=POLD1 PE=1 SV=2	16	19	24	19	123.6	1.058	0.983	0.899	1.067	1.084	1.042	1.093	1.008	1.019	3250.6	3439.6	3194.4	2921.1	3466.9	3524.1	3385.5	3553.2	3276.6	3312.6	0.577	0.392472	0.942	1.11	0.115564	0.992
P28347	TEAD1	Transcriptional enhancer factor TEF-1 OS=Homo sapiens OX=9606 GN=TEAD1 PE=1 SV=2	2	1	1	1	47.9	0.958	1.045	0.991	0.947	1.003	0.938	1.011	1.199	1.179	117.4	112.5	122.7	116.3	111.2	117.7	110.1	118.7	140.8	138.4	1.22	0.067294	0.772	-0.356	0.563192	0.997
P28370	SMARCA1	Probable global transcription activator SNF2L1 OS=Homo sapiens OX=9606 GN=SMARCA1 PE=1 SV=2	10	10	17	3	122.5	0.687	0.836	0.842	0.954	0.824	1.163	0.907	1.223	1.077	277.4	190.6	231.8	233.5	264.6	228.7	322.7	251.7	339.1	298.9	2.42	0.0386535	0.656	1.76	0.114508	0.992
P28482	MAPK1	Mitogen-activated protein kinase 1 OS=Homo sapiens OX=9606 GN=MAPK1 PE=1 SV=3	23	8	13	5	41.4	1.092	1.054	0.92	1.064	1.078	1.129	1.045	0.927	0.955	1360.6	1486.2	1433.9	1251.5	1447.1	1466.6	1535.9	1421.5	1260.8	1299	-0.582	0.431152	0.946	0.924	0.22206	0.994
P28676	GCA	Grancalcin OS=Homo sapiens OX=9606 GN=GCA PE=1 SV=2	8	2	4	2	24	0.942	0.952	1.058	0.926	1.028	0.946	0.995	1.136	1.165	620.6	584.4	590.8	656.9	574.6	638.3	586.9	617.8	705.2	723.3	1.1	0.117827	0.852	-0.156	0.814082	0.997
P28702	RXRB	Retinoic acid receptor RXR-beta OS=Homo sapiens OX=9606 GN=RXRB PE=1 SV=2	5	3	3	3	56.9	1.105	0.95	1.042	1.104	1.083	0.966	0.987	1.03	0.97	204.4	225.8	194.1	213	225.6	221.4	197.5	201.7	210.6	198.2	-0.519	0.448703	0.947	0.319	0.638206	0.997
P28749	RBL1	Retinoblastoma-like protein 1 OS=Homo sapiens OX=9606 GN=RBL1 PE=1 SV=3	1	1	1	1	120.8	1.256	0.748	0.773	1.094	0.993	1.101	0.967	0.939	0.632	72	90.4	53.8	55.6	78.8	71.5	79.2	69.6	67.6	45.5	-0.668	0.57306	0.956	1.49	0.222289	0.994
P28799	GRN	Progranulin OS=Homo sapiens OX=9606 GN=GRN PE=1 SV=2	2	1	1	1	63.5	0.829	1.216	1.154	1.017	1.009	0.916	0.94	1.262	1.095	212.4	176.2	258.2	245.1	216	214.4	194.5	199.7	267.9	232.5	0.248	0.816093	0.967	-0.622	0.56255	0.997
P28838	LAP3	Cytosol aminopeptidase OS=Homo sapiens OX=9606 GN=LAP3 PE=1 SV=3	36	16	24	16	56.1	0.989	1.115	1.097	0.987	1.087	0.988	0.901	1.038	1.058	2895.6	2863.3	3228.9	3176.9	2859.4	3148.5	2862.1	2607.9	3004.2	3063.3	-0.845	0.229525	0.912	-0.346	0.612038	0.997
P29083	GTF2E1	General transcription factor IIE subunit 1 OS=Homo sapiens OX=9606 GN=GTF2E1 PE=1 SV=2	10	3	4	3	49.4	0.988	1.034	1.016	1.088	0.918	0.915	0.92	1.071	1.063	453.5	447.9	468.9	460.9	493.2	416.1	414.7	417.4	485.8	482	-0.0809	0.913257	0.97	-0.377	0.614201	0.997
P29084	GTF2E2	Transcription initiation factor IIE subunit beta OS=Homo sapiens OX=9606 GN=GTF2E2 PE=1 SV=1	23	7	9	7	33	0.939	1.094	1.013	1.064	1.074	1.024	0.909	1.214	1.013	738.2	693	807.4	747.7	785.3	792.5	755.9	671.3	896.3	747.7	0.139	0.863142	0.968	0.714	0.383712	0.996
P29144	TPP2	Tripeptidyl-peptidase 2 OS=Homo sapiens OX=9606 GN=TPP2 PE=1 SV=4	17	21	29	21	138.3	0.982	0.971	0.972	1.032	1.055	1.021	1.026	0.959	0.987	4331	4253.3	4207.3	4208.2	4468.9	4569.4	4423.2	4445.5	4154.1	4273	0.124	0.813161	0.967	0.89	0.112187	0.991
P29218	IMPA1	Inositol monophosphatase 1 OS=Homo sapiens OX=9606 GN=IMPA1 PE=1 SV=1	15	4	7	4	30.2	0.968	1.146	0.976	0.996	1.161	1.102	1.01	0.929	0.957	1373.3	1329.2	1573.2	1340.5	1368	1594.1	1513.7	1387.2	1276.2	1314.6	-0.672	0.371116	0.939	0.824	0.277269	0.995
P29350	PTPN6	Tyrosine-protein phosphatase non-receptor type 6 OS=Homo sapiens OX=9606 GN=PTPN6 PE=1 SV=1	14	7	7	7	67.5	0.891	1.028	1.183	0.978	1.135	0.936	0.917	0.999	1.004	1454.4	1296.2	1495	1720.3	1422	1650.8	1361.6	1334.4	1453	1459.7	-0.681	0.439793	0.947	-0.0393	0.963905	0.998
P29353	SHC1	SHC-transforming protein 1 OS=Homo sapiens OX=9606 GN=SHC1 PE=1 SV=4	11	4	5	4	62.8	1.022	1.005	0.91	1.086	1.032	1.055	1.035	0.967	0.912	997.3	1019.6	1002.6	907.1	1082.9	1028.9	1051.8	1032.1	964	909.6	-0.13	0.839957	0.968	1.07	0.11839	0.992
P29372	MPG	DNA-3-methyladenine glycosylase OS=Homo sapiens OX=9606 GN=MPG PE=1 SV=3	28	7	9	7	32.8	0.903	1.104	1.075	0.928	0.99	0.868	1.042	1.174	1.234	791.1	714.7	873.2	850.8	734	782.8	686.8	824.2	929.1	975.8	1.13	0.146075	0.875	-1.04	0.176969	0.994
P29401	TKT	Transketolase OS=Homo sapiens OX=9606 GN=TKT PE=1 SV=3	33	16	40	16	67.8	1.074	0.985	1.061	0.922	0.986	0.933	0.995	0.97	1.049	10124.9	10878.3	9978	10744	9335.9	9980.2	9445.8	10071.2	9817.6	10617	-0.551	0.345323	0.936	-1.12	0.072345	0.988
P29692	EEF1D	Elongation factor 1-delta OS=Homo sapiens OX=9606 GN=EEF1D PE=1 SV=5	44	10	16	9	31.1	1.048	1.061	1.017	0.992	0.935	0.949	0.974	1.005	0.99	1897.9	1988.5	2013.3	1930.2	1883.2	1775.1	1800.4	1849.2	1906.9	1879.1	-0.717	0.172589	0.89	-0.946	0.081244	0.989
P29728	OAS2	2'-5'-oligoadenylate synthase 2 OS=Homo sapiens OX=9606 GN=OAS2 PE=1 SV=3	1	1	1	1	82.4	1.256	1.142	1.185	1.308	0.938	1.436	1.117	1.153	1.311	15.6	19.6	17.8	18.5	20.4	14.6	22.4	17.4	18	20.4	-0.0984	0.916316	0.97	-0.103	0.912259	0.998
P29762	CRABP1	Cellular retinoic acid-binding protein 1 OS=Homo sapiens OX=9606 GN=CRABP1 PE=1 SV=2	28	4	4	4	15.6	1.403	0.994	1.643	0.879	0.82	0.873	0.806	0.735	0.561	380.7	534.3	378.4	625.7	334.7	312.2	332.4	306.9	279.8	213.5	-4.5	0.000271274	0.00288	-3.67	0.00121343	0.625
P29966	MARCKS	Myristoylated alanine-rich C-kinase substrate OS=Homo sapiens OX=9606 GN=MARCKS PE=1 SV=4	33	6	12	6	31.5	0.818	0.69	1.247	0.71	0.696	0.898	0.997	1.147	1.211	1835.8	1502.5	1265.9	2289.1	1303.6	1277.3	1649.5	1831	2105.5	2222.3	1.78	0.129265	0.863	-1.38	0.228851	0.995
P29992	GNA11	Guanine nucleotide-binding protein subunit alpha-11 OS=Homo sapiens OX=9606 GN=GNA11 PE=1 SV=2	7	2	2	2	42.1	0.765	0.529	0.873	0.995	0.672	1.088	0.72	1.032	0.724	258.2	197.6	136.7	225.5	256.8	173.4	280.8	185.8	266.5	187	0.688	0.529936	0.954	1.72	0.134505	0.992
P30038	ALDH4A1	Delta-1-pyrroline-5-carboxylate dehydrogenase, mitochondrial OS=Homo sapiens OX=9606 GN=ALDH4A1 PE=1 SV=3	16	8	12	8	61.7	1.037	1.297	1.027	1.118	1.23	1.05	0.945	0.907	0.872	1226.2	1271.2	1590.1	1259.9	1371.4	1508	1288	1158.9	1112.2	1068.9	-2.09	0.00974993	0.334	0.493	0.470852	0.996
P30039	PBLD	Phenazine biosynthesis-like domain-containing protein OS=Homo sapiens OX=9606 GN=PBLD PE=1 SV=2	23	5	5	5	31.8	0.467	0.708	1.596	0.429	0.441	0.404	0.694	0.866	2.714	372.3	173.9	263.5	594.3	159.8	164.1	150.6	258.5	322.5	1010.3	0.918	0.65127	0.96	-2.74	0.193761	0.994
P30040	ERP29	Endoplasmic reticulum resident protein 29 OS=Homo sapiens OX=9606 GN=ERP29 PE=1 SV=4	36	9	23	9	29	1.074	1.116	0.982	1.035	1.068	1.036	0.906	0.935	0.866	3537	3799.3	3948.7	3472.5	3659.7	3777.4	3665.9	3203.9	3307.2	3062.8	-1.79	0.00862393	0.312	0.101	0.858503	0.998
P30041	PRDX6	Peroxiredoxin-6 OS=Homo sapiens OX=9606 GN=PRDX6 PE=1 SV=3	51	10	27	10	25	1.093	1.116	0.963	1.004	0.997	1.046	1.006	0.683	0.974	5030.7	5500.7	5613.4	4846.1	5051.5	5017.5	5261.4	5063.1	3434.9	4900.3	-1.57	0.0793026	0.799	-0.288	0.727606	0.997
P30043	BLVRB	Flavin reductase (NADPH) OS=Homo sapiens OX=9606 GN=BLVRB PE=1 SV=3	46	6	15	6	22.1	0.919	1.363	1.074	0.971	1.049	1.024	0.891	1.018	0.85	2738.1	2515.6	3731.6	2941.9	2657.6	2871.9	2804.4	2440.2	2788.6	2326.5	-1.67	0.081549	0.803	-0.461	0.60554	0.997
P30044	PRDX5	Peroxiredoxin-5, mitochondrial OS=Homo sapiens OX=9606 GN=PRDX5 PE=1 SV=4	25	4	8	4	22.1	0.859	0.936	1.151	0.851	1.066	0.856	0.856	1.043	1.165	1739.1	1494.7	1628.3	2002.3	1479.1	1853.9	1488.9	1488.3	1814.2	2026	0.287	0.791504	0.966	-0.535	0.62411	0.997
P30046	DDT	D-dopachrome decarboxylase OS=Homo sapiens OX=9606 GN=DDT PE=1 SV=3	31	4	7	4	12.7	0.818	1.181	1.013	1.041	1.136	1.067	0.889	0.986	1.011	1942.8	1589.6	2293.5	1968.4	2022.4	2207.4	2073.5	1727.9	1915.2	1963.4	-0.51	0.558317	0.956	1.15	0.201642	0.994
P30047	GCHFR	GTP cyclohydrolase 1 feedback regulatory protein OS=Homo sapiens OX=9606 GN=GCHFR PE=1 SV=3	49	2	3	2	9.7	1.096	1.121	1.134	1.224	1.196	1.213	1.162	1.207	0.919	155.2	170.2	174.1	176	190	185.7	188.3	180.3	187.4	142.7	-0.343	0.657021	0.961	0.893	0.260613	0.995
P30048	PRDX3	Thioredoxin-dependent peroxide reductase, mitochondrial OS=Homo sapiens OX=9606 GN=PRDX3 PE=1 SV=3	37	8	16	8	27.7	0.955	1.006	1.069	0.93	1.03	0.92	0.894	0.971	1.042	2479.7	2368.8	2494	2650	2307.2	2555.2	2280.3	2216.3	2407.4	2585	-0.605	0.375064	0.94	-0.536	0.430073	0.996
P30049	ATP5F1D	ATP synthase subunit delta, mitochondrial OS=Homo sapiens OX=9606 GN=ATP5F1D PE=1 SV=2	14	2	5	2	17.5	0.873	0.959	1.124	0.929	0.894	0.752	0.787	1.065	0.96	722.1	630.2	692.2	811.4	670.5	645.4	543.3	568.3	769.1	693.1	-0.493	0.588657	0.957	-1.27	0.178795	0.994
P30050	RPL12	60S ribosomal protein L12 OS=Homo sapiens OX=9606 GN=RPL12 PE=1 SV=1	63	8	22	8	17.8	1.035	1.095	1.048	1.063	0.992	1.04	1.02	1.06	0.929	4578.5	4740.5	5012.1	4799.5	4868.3	4543.1	4761.2	4667.8	4853.7	4255	-0.642	0.292198	0.927	-0.124	0.834336	0.998
P30084	ECHS1	Enoyl-CoA hydratase, mitochondrial OS=Homo sapiens OX=9606 GN=ECHS1 PE=1 SV=4	47	12	31	12	31.4	0.968	1.199	1.079	0.856	0.992	0.861	0.952	0.928	1.044	6020.7	5827.8	7218.3	6493.6	5152.2	5975.3	5180.9	5730.5	5586.3	6284	-1.16	0.142519	0.873	-1.81	0.0319688	0.979
P30085	CMPK1	UMP-CMP kinase OS=Homo sapiens OX=9606 GN=CMPK1 PE=1 SV=3	15	3	5	3	22.2	1.039	1.115	0.941	1.05	1.127	1.099	1.03	0.828	1.078	725	753.3	808.2	681.8	761.2	817.1	796.7	746.9	600	781.7	-0.563	0.489619	0.951	0.873	0.292425	0.995
P30086	PEBP1	Phosphatidylethanolamine-binding protein 1 OS=Homo sapiens OX=9606 GN=PEBP1 PE=1 SV=3	56	8	28	8	21	0.925	0.96	1.204	0.861	0.901	0.849	0.844	0.962	1.033	6505.2	6018.7	6242.1	7830.1	5601.1	5864.3	5524.5	5491.2	6261.2	6717.4	-0.895	0.280525	0.925	-1.64	0.0633457	0.987
P30101	PDIA3	Protein disulfide-isomerase A3 OS=Homo sapiens OX=9606 GN=PDIA3 PE=1 SV=4	48	21	66	21	56.7	1.046	1.026	0.968	0.994	1.077	0.936	1.033	0.994	0.944	12407	12974.7	12726.4	12007.6	12333.1	13362	11607.2	12817.1	12335.2	11711.7	-0.318	0.630955	0.959	-0.0784	0.905097	0.998
P30153	PPP2R1A	Serine/threonine-protein phosphatase 2A 65 kDa regulatory subunit A alpha isoform OS=Homo sapiens OX=9606 GN=PPP2R1A PE=1 SV=4	33	16	28	12	65.3	0.913	0.859	1.007	0.957	0.92	1.027	0.943	1.073	0.956	3951.5	3608.9	3395.1	3980.6	3783	3637.1	4058.8	3725.3	4239.4	3776.3	0.603	0.384621	0.941	0.49	0.476482	0.996
P30154	PPP2R1B	Serine/threonine-protein phosphatase 2A 65 kDa regulatory subunit A beta isoform OS=Homo sapiens OX=9606 GN=PPP2R1B PE=1 SV=3	16	8	8	4	66.2	1.032	0.833	1.066	1.007	0.907	1.005	1.009	1.034	0.995	557.3	575.2	464.2	594.3	561.4	505.5	559.9	562.1	576.3	554.6	0.217	0.764069	0.965	-0.089	0.901861	0.998
P30260	CDC27	Cell division cycle protein 27 homolog OS=Homo sapiens OX=9606 GN=CDC27 PE=1 SV=2	5	4	5	4	91.8	1.029	1.061	1.024	1.031	0.958	0.929	1.111	1.043	0.989	228.1	234.7	242.1	233.5	235.2	218.5	211.9	253.5	238	225.6	0.0513	0.934974	0.97	-0.696	0.283086	0.995
P30291	WEE1	Wee1-like protein kinase OS=Homo sapiens OX=9606 GN=WEE1 PE=1 SV=2	3	2	2	2	71.6	1.1	1.007	0.629	1.13	0.971	1.137	1.082	0.631	0.599	623.8	686	628	392.4	704.6	605.4	709.4	674.7	393.6	373.8	-1	0.448349	0.947	1.46	0.277773	0.995
P30305	CDC25B	M-phase inducer phosphatase 2 OS=Homo sapiens OX=9606 GN=CDC25B PE=1 SV=2	2	1	1	1	64.9	1.2	0.958	0.853	1.286	1.087	1.302	1.005	0.863	0.926	60.3	72.4	57.8	51.5	77.6	65.6	78.5	60.6	52	55.8	-0.783	0.416507	0.944	2.1	0.0462783	0.984
P30307	CDC25C	M-phase inducer phosphatase 3 OS=Homo sapiens OX=9606 GN=CDC25C PE=1 SV=2	7	3	3	3	53.3	0.987	0.89	0.871	1.042	1.024	0.963	0.996	1.012	0.933	475.3	469.3	423.1	414.1	495.3	486.7	457.7	473.3	481.2	443.4	0.612	0.316211	0.931	1.13	0.0803199	0.989
P30405	PPIF	Peptidyl-prolyl cis-trans isomerase F, mitochondrial OS=Homo sapiens OX=9606 GN=PPIF PE=1 SV=1	30	5	10	5	22	1.093	1.103	1.163	0.924	1.058	0.95	0.791	0.899	1.007	2400.3	2623.8	2647.3	2792.2	2217.2	2540.1	2280.6	1899.3	2156.7	2418.2	-2.44	0.00510236	0.211	-1.49	0.0548663	0.986
P30419	NMT1	Glycylpeptide N-tetradecanoyltransferase 1 OS=Homo sapiens OX=9606 GN=NMT1 PE=1 SV=2	17	8	9	8	56.8	0.92	0.851	1.066	0.9	0.852	0.956	0.947	1.125	1.185	1009	928.7	858.7	1075.8	908.4	859.7	965.1	955.1	1135	1195.4	1.26	0.132096	0.865	-0.53	0.50596	0.997
P30519	HMOX2	Heme oxygenase 2 OS=Homo sapiens OX=9606 GN=HMOX2 PE=1 SV=2	6	2	2	2	36	0.948	1.016	1.023	0.892	0.978	0.889	0.957	1.049	1.179	93.1	88.3	94.6	95.2	83.1	91.1	82.8	89.1	97.7	109.8	0.531	0.428513	0.946	-0.864	0.208728	0.994
P30520	ADSS2	Adenylosuccinate synthetase isozyme 2 OS=Homo sapiens OX=9606 GN=ADSS2 PE=1 SV=3	24	9	15	8	50.1	1.067	0.973	0.882	1.073	1.039	1.059	0.981	0.859	0.851	1172.9	1251.3	1141.7	1034.7	1259	1218.7	1241.8	1151	1007.4	997.6	-0.871	0.233061	0.913	1.09	0.143454	0.993
P30533	LRPAP1	Alpha-2-macroglobulin receptor-associated protein OS=Homo sapiens OX=9606 GN=LRPAP1 PE=1 SV=1	15	5	5	5	41.4	0.957	1.059	1.036	0.952	1.077	0.959	1.009	1.1	1.227	662.8	634.2	702	686.7	631	713.5	635.8	669	729.2	813.6	0.824	0.23918	0.915	-0.162	0.810354	0.997
P30536	TSPO	Translocator protein OS=Homo sapiens OX=9606 GN=TSPO PE=1 SV=3	5	1	1	1	18.8	0.737	1.174	1.115	0.923	0.852	0.879	0.732	0.882	1.101	448.6	330.6	526.5	500.1	414.1	382.3	394.4	328.6	395.8	493.8	-1.14	0.326461	0.933	-1.43	0.22601	0.994
P30566	ADSL	Adenylosuccinate lyase OS=Homo sapiens OX=9606 GN=ADSL PE=1 SV=2	19	9	16	9	54.9	0.972	0.908	0.977	1.018	1.061	1.016	0.911	1.007	0.953	2666	2590.6	2421.8	2603.5	2714.1	2828.3	2707.5	2427.5	2683.9	2541.5	-0.0747	0.887982	0.969	1.07	0.0654954	0.988
P30622	CLIP1	CAP-Gly domain-containing linker protein 1 OS=Homo sapiens OX=9606 GN=CLIP1 PE=1 SV=2	4	6	6	5	162.1	0.699	0.509	0.75	1.273	0.625	1.361	0.751	1.08	0.805	789	551.1	401.6	591.6	1004.2	493.2	1073.9	592.5	851.8	635.5	1.47	0.316999	0.932	3.44	0.0336496	0.98
P30626	SRI	Sorcin OS=Homo sapiens OX=9606 GN=SRI PE=1 SV=1	20	4	8	4	21.7	0.823	0.826	1.182	0.761	0.75	0.766	0.818	1.278	1.303	1061	872.8	876	1253.8	807.6	795.2	812.5	867.9	1356.3	1382	1.4	0.273195	0.923	-1.7	0.189469	0.994
P30740	SERPINB1	Leukocyte elastase inhibitor OS=Homo sapiens OX=9606 GN=SERPINB1 PE=1 SV=1	28	10	18	10	42.7	0.915	0.905	1.277	0.792	0.783	0.755	0.842	1.088	1.156	2076.6	1900.7	1880	2651	1644.5	1626.8	1567.7	1749	2259.7	2400.4	0.0625	0.951662	0.971	-2.26	0.0478953	0.985
P30837	ALDH1B1	Aldehyde dehydrogenase X, mitochondrial OS=Homo sapiens OX=9606 GN=ALDH1B1 PE=1 SV=3	14	6	8	6	57.2	0.889	0.9	1.181	0.701	0.829	0.68	0.875	1.225	1.361	877.1	779.5	789.7	1035.9	614.6	727.6	596.6	767.7	1074.7	1193.4	1.16	0.307047	0.93	-2.17	0.0724749	0.988
P30876	POLR2B	DNA-directed RNA polymerase II subunit RPB2 OS=Homo sapiens OX=9606 GN=POLR2B PE=1 SV=1	18	17	24	17	133.8	1.001	0.985	1.039	0.998	0.999	0.999	0.983	1.053	1.079	2094.4	2095.8	2063.8	2176.3	2090.4	2092.6	2092.4	2059.4	2206.2	2259.2	0.217	0.665633	0.961	-0.0114	0.981876	0.998
P31025	LCN1	Lipocalin-1 OS=Homo sapiens OX=9606 GN=LCN1 PE=1 SV=1	18	3	3	3	19.2	0.765	0.536	0.574	0.536	0.665	0.725	51.006	0.312	3.697	110.3	84.3	59.2	63.3	59.1	73.3	80	5625.2	34.4	407.7	6.51	0.0288379	0.579	-0.133	0.959642	0.998
P31040	SDHA	Succinate dehydrogenase [ubiquinone] flavoprotein subunit, mitochondrial OS=Homo sapiens OX=9606 GN=SDHA PE=1 SV=2	26	13	19	13	72.6	0.994	1.071	1.05	0.965	1.008	0.915	0.874	0.948	1.039	3111.7	3092.1	3331.2	3267	3003	3137.4	2846.9	2718.2	2948.4	3233	-1.11	0.0986379	0.83	-0.826	0.204247	0.994
P31150	GDI1	Rab GDP dissociation inhibitor alpha OS=Homo sapiens OX=9606 GN=GDI1 PE=1 SV=2	41	15	27	10	50.6	0.971	1.052	1.06	0.995	1.16	1.035	0.943	0.966	1.001	1635.5	1588.2	1721	1733.7	1628	1896.7	1692.8	1543	1580.1	1636.9	-0.773	0.226643	0.911	0.504	0.420755	0.996
P31153	MAT2A	S-adenosylmethionine synthase isoform type-2 OS=Homo sapiens OX=9606 GN=MAT2A PE=1 SV=1	32	13	25	13	43.6	1.062	0.985	0.931	0.997	1.004	1.01	1.077	0.993	1.022	4521.4	4801.7	4454.4	4210.4	4505.9	4540.2	4566.9	4867.6	4488.7	4622.9	0.342	0.590378	0.957	0.213	0.735928	0.997
P31323	PRKAR2B	cAMP-dependent protein kinase type II-beta regulatory subunit OS=Homo sapiens OX=9606 GN=PRKAR2B PE=1 SV=3	21	6	8	4	46.3	0.693	0.907	1.131	0.968	0.823	1.145	1.42	1.082	0.927	341	236.2	309.5	385.5	330	280.6	390.3	484.4	369	316	1.75	0.204692	0.904	0.596	0.654147	0.997
P31350	RRM2	Ribonucleoside-diphosphate reductase subunit M2 OS=Homo sapiens OX=9606 GN=RRM2 PE=1 SV=1	34	11	17	10	44.8	1.028	0.942	0.826	1.105	0.964	1.069	0.89	0.993	0.855	2053.4	2111.3	1934.3	1695.9	2269	1979.1	2194.5	1827.2	2038.7	1755.4	-0.38	0.61549	0.959	1.32	0.101461	0.991
P31483	TIA1	Nucleolysin TIA-1 isoform p40 OS=Homo sapiens OX=9606 GN=TIA1 PE=1 SV=3	15	6	10	3	42.9	1.102	0.971	1.04	1.048	1.007	1.012	1.077	1.016	1.064	819	902.2	795.5	851.8	858.2	824.9	829.1	882	832.3	871	0.0744	0.900608	0.969	-0.0316	0.957662	0.998
P31689	DNAJA1	DnaJ homolog subfamily A member 1 OS=Homo sapiens OX=9606 GN=DNAJA1 PE=1 SV=2	33	10	22	10	44.8	1.107	0.976	1.12	1.004	0.999	0.925	0.957	1.012	0.987	2963.6	3280.3	2891.8	3320.6	2976.4	2960.9	2741.3	2835.7	2998.4	2924.9	-1.04	0.11013	0.844	-0.97	0.132179	0.992
P31749	AKT1	RAC-alpha serine/threonine-protein kinase OS=Homo sapiens OX=9606 GN=AKT1 PE=1 SV=2	26	11	14	7	55.7	1.089	1.145	0.986	1.166	1.228	1.189	1.096	0.859	0.917	586.1	638.4	671.1	578	683.4	719.5	697	642.6	503.3	537.5	-1.21	0.157748	0.882	1.26	0.14195	0.993
P31751	AKT2	RAC-beta serine/threonine-protein kinase OS=Homo sapiens OX=9606 GN=AKT2 PE=1 SV=2	23	10	12	6	55.7	1.006	1.122	1.114	0.957	0.972	0.971	0.921	1.033	0.997	621.8	625.5	697.8	692.6	594.8	604.4	603.7	572.6	642.2	619.9	-1.15	0.0656563	0.767	-1.19	0.0577561	0.987
P31930	UQCRC1	Cytochrome b-c1 complex subunit 1, mitochondrial OS=Homo sapiens OX=9606 GN=UQCRC1 PE=1 SV=3	35	12	22	12	52.6	1.033	1.166	1.023	1.045	1.007	1.007	1.033	0.933	1.028	2413.2	2492.5	2814.1	2469	2521.4	2429.2	2430.4	2494	2251.2	2480.6	-0.836	0.196086	0.901	-0.351	0.574129	0.997
P31937	HIBADH	3-hydroxyisobutyrate dehydrogenase, mitochondrial OS=Homo sapiens OX=9606 GN=HIBADH PE=1 SV=2	29	6	13	6	35.3	0.999	1.201	1.035	0.891	1.205	0.928	0.898	1.07	1.11	1753.2	1750.7	2106.2	1815.3	1562.1	2112.7	1626.9	1574.3	1876.2	1945.9	-0.597	0.550441	0.955	-0.764	0.447364	0.996
P31939	ATIC	Bifunctional purine biosynthesis protein ATIC OS=Homo sapiens OX=9606 GN=ATIC PE=1 SV=3	44	21	44	21	64.6	1.003	1.044	0.994	1.021	1.049	0.994	0.89	0.946	0.976	7372.8	7391.6	7697.8	7331	7528.2	7737.5	7329.7	6560.7	6975.4	7195.5	-1.01	0.0741668	0.788	0.243	0.643235	0.997
P31942	HNRNPH3	Heterogeneous nuclear ribonucleoprotein H3 OS=Homo sapiens OX=9606 GN=HNRNPH3 PE=1 SV=2	42	9	19	9	36.9	1.004	0.952	0.978	0.979	0.965	1.033	0.963	0.951	1.034	1938.3	1947	1844.5	1896.4	1897.8	1869.5	2003.2	1866.9	1843.8	2004.6	-0.0972	0.860807	0.968	0.241	0.665026	0.997
P31943	HNRNPH1	Heterogeneous nuclear ribonucleoprotein H OS=Homo sapiens OX=9606 GN=HNRNPH1 PE=1 SV=4	30	9	39	5	49.2	1.036	0.948	1.046	0.954	0.959	0.956	0.958	1.004	1.039	1515.6	1570.6	1436.4	1585.9	1445.2	1453.9	1449.7	1452.2	1521.4	1574	-0.283	0.599783	0.958	-0.655	0.238614	0.995
P31944	CASP14	Caspase-14 OS=Homo sapiens OX=9606 GN=CASP14 PE=1 SV=2	16	3	3	3	27.7	1.291	0.956	0.861	0.885	0.795	1.127	1.242	1.163	2.087	161.5	208.5	154.3	139	143	128.5	181.9	200.6	187.9	337	2.41	0.0744633	0.789	-0.807	0.519965	0.997
P31946	YWHAB	14-3-3 protein beta/alpha OS=Homo sapiens OX=9606 GN=YWHAB PE=1 SV=3	52	11	43	5	28.1	0.918	1.02	1.002	0.973	1.04	1.03	0.928	0.942	0.953	1191.6	1093.5	1214.9	1194.5	1159.3	1239.1	1227.8	1105.7	1122	1135.6	-0.535	0.357722	0.938	0.557	0.339104	0.996
P31947	SFN	14-3-3 protein sigma OS=Homo sapiens OX=9606 GN=SFN PE=1 SV=1	57	13	43	10	27.8	0.851	0.976	0.781	1.176	1.124	1.194	1.039	0.821	0.744	5288.7	4500.2	5160.9	4128.9	6220	5943	6316	5495.5	4340.2	3933.7	0.19	0.820153	0.967	3.14	0.00307721	0.839
P31948	STIP1	Stress-induced-phosphoprotein 1 OS=Homo sapiens OX=9606 GN=STIP1 PE=1 SV=1	42	23	50	23	62.6	0.998	0.97	0.981	0.925	0.964	0.941	0.973	0.953	1.011	10944.8	10922.3	10620.6	10733.8	10129.4	10555	10304.5	10645.3	10435.6	11062.1	-0.172	0.734561	0.964	-0.483	0.349133	0.996
P31949	S100A11	Protein S100-A11 OS=Homo sapiens OX=9606 GN=S100A11 PE=1 SV=2	17	2	3	2	11.7	0.781	0.972	1.179	0.917	0.759	0.957	1.013	1.093	1.135	268.2	209.4	260.7	316.1	245.9	203.5	256.6	271.8	293.1	304.3	1.05	0.274457	0.924	-0.982	0.30405	0.995
P32119	PRDX2	Peroxiredoxin-2 OS=Homo sapiens OX=9606 GN=PRDX2 PE=1 SV=5	31	7	33	6	21.9	1.005	1.027	1.003	0.961	1.123	1.014	0.909	0.858	1.074	8529.5	8574	8760.6	8557.7	8195.1	9580.6	8653.1	7751.9	7320.6	9157.9	-0.868	0.254813	0.919	0.299	0.686112	0.997
P32121	ARRB2	Beta-arrestin-2 OS=Homo sapiens OX=9606 GN=ARRB2 PE=1 SV=2	12	3	3	3	46.1	1.042	1.05	0.893	1.246	1.179	1.248	1.162	0.984	0.852	235.4	245.2	247.2	210.2	293.2	277.4	293.6	273.5	231.7	200.5	0.00365	0.996718	0.972	2.22	0.028109	0.977
P32189	GK	Glycerol kinase OS=Homo sapiens OX=9606 GN=GK PE=1 SV=3	9	5	5	5	61.2	0.962	0.967	0.905	0.978	0.947	0.972	0.836	0.93	0.854	616.9	593.5	596.6	558.6	603.4	584	599.7	515.5	573.8	526.8	-0.796	0.148954	0.877	0.28	0.594765	0.997
P32322	PYCR1	Pyrroline-5-carboxylate reductase 1, mitochondrial OS=Homo sapiens OX=9606 GN=PYCR1 PE=1 SV=2	26	6	13	6	33.3	1.111	0.961	0.821	1.055	1.151	1.061	0.979	0.964	0.891	1752.9	1948.2	1684.8	1440	1848.7	2018.3	1860.3	1715.8	1689.6	1562.5	-0.39	0.624705	0.959	1.43	0.0933558	0.99
P32519	ELF1	ETS-related transcription factor Elf-1 OS=Homo sapiens OX=9606 GN=ELF1 PE=1 SV=2	6	2	2	2	67.5	1.479	1.181	1.089	1.156	0.962	1.149	1.329	1.1	0.957	106.5	157.5	125.8	115.9	123.1	102.5	122.4	141.6	117.1	102	-0.871	0.396268	0.942	-0.847	0.408806	0.996
P32780	GTF2H1	General transcription factor IIH subunit 1 OS=Homo sapiens OX=9606 GN=GTF2H1 PE=1 SV=1	3	2	2	2	62	0.995	1.21	1.156	0.954	0.986	0.981	0.974	1.052	1.012	86.8	86.4	105	100.4	82.9	85.6	85.1	84.5	91.3	87.9	-1.03	0.116092	0.851	-1.35	0.0486725	0.985
P32929	CTH	Cystathionine gamma-lyase OS=Homo sapiens OX=9606 GN=CTH PE=1 SV=3	3	1	1	1	44.5	1.067	1.088	0.955	1.332	1.209	1.028	1.306	1.138	0.9	34.2	36.5	37.2	32.7	45.6	41.4	35.2	44.7	38.9	30.8	0.529	0.601142	0.958	1.39	0.187168	0.994
P32969	RPL9	60S ribosomal protein L9 OS=Homo sapiens OX=9606 GN=RPL9 PE=1 SV=1	36	6	10	6	21.9	0.958	1.076	0.973	1.068	0.934	1.02	0.977	1.016	0.979	1945.7	1863.9	2094.1	1893.5	2077.7	1816.6	1984.6	1901.5	1977.1	1905.2	-0.164	0.797926	0.966	0.257	0.689773	0.997
P33121	ACSL1	Long-chain-fatty-acid--CoA ligase 1 OS=Homo sapiens OX=9606 GN=ACSL1 PE=1 SV=1	6	4	8	4	77.9	0.911	1.658	0.81	1.677	1.901	1.435	1.309	0.606	0.48	722.1	657.6	1197	584.7	1211.4	1372.4	1036.4	944.9	437.5	346.4	-1.23	0.469421	0.949	3.51	0.0564074	0.986
P33176	KIF5B	Kinesin-1 heavy chain OS=Homo sapiens OX=9606 GN=KIF5B PE=1 SV=1	35	27	39	19	109.6	0.854	0.648	0.816	0.989	0.603	1.202	0.971	1.006	1.076	3788	3236	2455.6	3092.7	3745.4	2283.4	4551.7	3678.4	3812.1	4076.4	2.07	0.0786094	0.798	1.68	0.141718	0.993
P33240	CSTF2	Cleavage stimulation factor subunit 2 OS=Homo sapiens OX=9606 GN=CSTF2 PE=1 SV=1	20	9	10	4	60.9	1.008	0.959	1.06	0.928	1.002	0.945	0.912	1.099	1.129	777.4	783.7	745.9	824.2	721.8	779.3	734.5	708.8	854.5	877.7	0.196	0.781518	0.966	-0.595	0.407525	0.996
P33316	DUT	Deoxyuridine 5'-triphosphate nucleotidohydrolase, mitochondrial OS=Homo sapiens OX=9606 GN=DUT PE=1 SV=4	54	10	21	10	26.5	1.148	0.858	0.848	1.12	1.09	1.154	1.096	0.982	0.786	2612.3	2998.1	2241.7	2216.1	2925.1	2846.3	3015	2862.6	2565.1	2054.2	0.0989	0.923094	0.97	1.93	0.0824289	0.989
P33402	GUCY1A2	Guanylate cyclase soluble subunit alpha-2 OS=Homo sapiens OX=9606 GN=GUCY1A2 PE=1 SV=1	3	2	2	2	81.7	0.857	0.743	1.395	0.882	0.717	0.872	0.758	1.058	1.005	204	174.8	151.6	284.6	179.9	146.3	177.9	154.7	215.7	205	-0.296	0.811566	0.967	-1.44	0.260228	0.995
P33908	MAN1A1	Mannosyl-oligosaccharide 1,2-alpha-mannosidase IA OS=Homo sapiens OX=9606 GN=MAN1A1 PE=1 SV=3	1	1	1	1	72.9	0.503	0.978	1.594	0.461	0.516	0.361	0.527	1.734	1.357	88.6	44.6	86.6	141.2	40.8	45.7	31.9	46.7	153.5	120.1	0.968	0.61144	0.959	-3.4	0.0950531	0.99
P33991	MCM4	DNA replication licensing factor MCM4 OS=Homo sapiens OX=9606 GN=MCM4 PE=1 SV=5	29	21	32	21	96.5	1.102	1.034	0.873	1.085	1.133	1.081	1.107	0.947	0.876	5187.8	5717.1	5365.1	4527.3	5628.2	5878.8	5608.1	5742.4	4911.7	4544.5	-0.338	0.702449	0.963	1.2	0.190778	0.994
P33992	MCM5	DNA replication licensing factor MCM5 OS=Homo sapiens OX=9606 GN=MCM5 PE=1 SV=5	30	19	30	19	82.2	1.047	0.985	0.866	1.088	1.177	1.088	1.07	0.958	0.894	2688.7	2814.5	2649.3	2329.7	2925	3164.3	2926	2876.4	2575.7	2403.9	0.022	0.977112	0.971	1.74	0.0419986	0.983
P33993	MCM7	DNA replication licensing factor MCM7 OS=Homo sapiens OX=9606 GN=MCM7 PE=1 SV=4	33	22	37	22	81.3	1.078	1.008	0.86	1.096	1.157	1.113	1.092	0.937	0.851	4767.9	5140	4804.6	4102.7	5227.6	5518.4	5306.3	5206.4	4468.8	4055.4	-0.273	0.753138	0.965	1.61	0.085461	0.99
P34096	RNASE4	Ribonuclease 4 OS=Homo sapiens OX=9606 GN=RNASE4 PE=1 SV=3	16	2	3	2	16.8	0.954	0.694	0.639	1.421	1.319	1.538	1.35	0.737	0.471	148.7	141.8	103.1	95	211.3	196.1	228.7	200.7	109.6	70.1	0.985	0.47615	0.95	4.89	0.00418592	0.88
P34741	SDC2	Syndecan-2 OS=Homo sapiens OX=9606 GN=SDC2 PE=1 SV=2	4	1	2	1	22.1	0.551	0.538	1.112	0.475	0.537	0.505	0.434	1.264	1.79	301.8	166.4	162.2	335.6	143.3	162.1	152.3	130.9	381.5	540.2	2.33	0.1944	0.9	-1.69	0.33815	0.996
P34896	SHMT1	Serine hydroxymethyltransferase, cytosolic OS=Homo sapiens OX=9606 GN=SHMT1 PE=1 SV=1	19	8	14	6	53	1.055	0.933	0.993	0.973	1.003	0.939	0.903	0.96	0.991	1019.9	1076	951.2	1012.7	992.3	1023.2	957.5	920.9	978.6	1010.7	-0.682	0.260657	0.92	-0.262	0.656284	0.997
P34897	SHMT2	Serine hydroxymethyltransferase, mitochondrial OS=Homo sapiens OX=9606 GN=SHMT2 PE=1 SV=3	47	22	69	20	56	1.019	1.047	0.917	1.097	1.116	1.076	1.122	1.004	0.901	7336.9	7479.9	7680.4	6728.9	8050.4	8185.5	7893.8	8234.3	7366.3	6610.9	0.14	0.85252	0.968	1.32	0.102801	0.991
P34913	EPHX2	Bifunctional epoxide hydrolase 2 OS=Homo sapiens OX=9606 GN=EPHX2 PE=1 SV=2	17	7	13	7	62.6	0.819	1.352	1.279	0.683	0.778	0.635	0.803	1.128	1.491	1593.7	1305.2	2155	2037.9	1088.8	1240.1	1011.5	1280.4	1797.6	2375.8	-0.259	0.851724	0.968	-3.51	0.0260463	0.976
P34932	HSPA4	Heat shock 70 kDa protein 4 OS=Homo sapiens OX=9606 GN=HSPA4 PE=1 SV=4	46	32	51	31	94.3	1.019	1.181	1.085	0.9	0.955	0.918	0.956	1.01	1.066	7581.8	7724.9	8956.7	8227.8	6821.7	7238.3	6957.9	7248	7661.3	8082.1	-0.959	0.119468	0.854	-1.84	0.00827359	0.936
P34949	MPI	Mannose-6-phosphate isomerase OS=Homo sapiens OX=9606 GN=MPI PE=1 SV=2	13	4	5	4	46.6	1.109	1.129	1.159	0.955	0.936	0.81	0.936	1.029	1.199	547.9	607.5	618.7	635.2	523.4	512.7	443.8	512.9	563.8	656.8	-1.05	0.153123	0.88	-2.46	0.00445421	0.887
P35080	PFN2	Profilin-2 OS=Homo sapiens OX=9606 GN=PFN2 PE=1 SV=3	26	3	6	3	15	0.748	0.874	1.447	0.701	0.759	0.662	0.733	1.1	1.294	682	510.4	596.3	986.9	478.4	517.4	451.4	499.9	750.1	882.7	0.439	0.75904	0.965	-2.32	0.126621	0.992
P35221	CTNNA1	Catenin alpha-1 OS=Homo sapiens OX=9606 GN=CTNNA1 PE=1 SV=1	39	30	45	30	100	1.013	0.986	0.933	1.125	1.057	1.122	1.044	0.931	0.909	8076.8	8183.9	7960.6	7538.5	9084.7	8535.7	9059.4	8429.2	7521.2	7343.3	-0.203	0.757793	0.965	1.55	0.0356548	0.981
P35222	CTNNB1	Catenin beta-1 OS=Homo sapiens OX=9606 GN=CTNNB1 PE=1 SV=1	23	16	27	14	85.4	0.97	0.807	0.96	1.127	0.929	1.152	0.953	0.967	0.795	3327.9	3226.4	2684.8	3195.1	3749.6	3090	3833.8	3170.2	3218.7	2645.1	-0.12	0.883191	0.969	1.72	0.0554862	0.986
P35226	BMI1	Polycomb complex protein BMI-1 OS=Homo sapiens OX=9606 GN=BMI1 PE=1 SV=2	6	2	2	2	36.9	0.929	0.853	1.049	0.778	0.994	0.873	0.85	1.141	1.162	316	293.5	269.5	331.6	245.8	314.1	275.9	268.8	360.6	367.4	0.917	0.36015	0.938	-0.633	0.523388	0.997
P35232	PHB	Prohibitin OS=Homo sapiens OX=9606 GN=PHB PE=1 SV=1	46	12	32	12	29.8	0.98	1.004	1.008	0.95	0.933	0.886	0.913	0.984	1.012	7018.2	6876.6	7046.8	7072.4	6665.1	6545.4	6220.6	6407.6	6909.2	7105.7	-0.461	0.386405	0.941	-0.874	0.116151	0.992
P35237	SERPINB6	Serpin B6 OS=Homo sapiens OX=9606 GN=SERPINB6 PE=1 SV=3	37	10	14	10	42.6	0.801	1.085	1.347	0.911	1.117	0.887	0.809	1.007	0.97	941.4	754.4	1021.4	1267.7	857.5	1051.5	835.3	761.7	947.6	913.1	-1.32	0.28218	0.925	-0.796	0.507493	0.997
P35240	NF2	Merlin OS=Homo sapiens OX=9606 GN=NF2 PE=1 SV=1	7	4	4	4	69.6	1.117	1.082	1.032	1.025	1.041	1.026	1.009	0.953	1.003	771.1	861	834.5	795.4	790.1	802.6	791.3	777.8	734.7	773.4	-1.08	0.070156	0.779	-0.332	0.546999	0.997
P35241	RDX	Radixin OS=Homo sapiens OX=9606 GN=RDX PE=1 SV=1	19	11	17	5	68.5	0.669	0.549	0.775	1.01	0.532	1.341	0.843	1.176	1.212	603.8	403.8	331.8	468.1	610.1	321.1	809.9	509.2	710.2	731.7	3.06	0.0506517	0.717	2.5	0.100834	0.991
P35244	RPA3	Replication protein A 14 kDa subunit OS=Homo sapiens OX=9606 GN=RPA3 PE=1 SV=1	21	2	2	2	13.6	0.958	0.908	0.747	1.139	1.111	1.262	1.069	0.829	0.802	249.2	238.7	226.2	186.1	283.8	277	314.5	266.5	206.6	199.9	0.342	0.694407	0.962	3.05	0.0047272	0.893
P35249	RFC4	Replication factor C subunit 4 OS=Homo sapiens OX=9606 GN=RFC4 PE=1 SV=2	28	9	14	9	39.7	1.073	0.959	0.937	1.064	1.07	1.081	1.091	1.071	1.006	2333.8	2504.1	2237.4	2187.9	2483.9	2496.5	2522.8	2545.9	2499.6	2346.9	0.684	0.298321	0.928	1.1	0.107483	0.991
P35250	RFC2	Replication factor C subunit 2 OS=Homo sapiens OX=9606 GN=RFC2 PE=1 SV=3	27	8	12	8	39.1	0.992	0.99	0.985	0.977	0.998	1.017	0.906	1.048	0.997	1477.7	1466.5	1463.6	1455.4	1444.2	1474.9	1502.2	1339	1548.4	1473.3	-0.186	0.743844	0.964	0.198	0.728321	0.997
P35251	RFC1	Replication factor C subunit 1 OS=Homo sapiens OX=9606 GN=RFC1 PE=1 SV=4	4	4	5	4	128.2	0.957	0.797	0.86	1.068	0.83	1.017	1.063	1.092	1.189	553.9	530	441.3	476.2	591.3	459.7	563.2	589.1	605	658.8	2.39	0.00937722	0.328	1.15	0.153355	0.993
P35268	RPL22	60S ribosomal protein L22 OS=Homo sapiens OX=9606 GN=RPL22 PE=1 SV=2	30	3	8	3	14.8	0.901	0.713	0.783	1.074	0.964	1.111	0.972	1.099	0.91	1075.6	968.9	767.2	841.9	1155.3	1036.9	1195.3	1045.5	1182	979	1.71	0.0376709	0.649	2.54	0.00519395	0.902
P35270	SPR	Sepiapterin reductase OS=Homo sapiens OX=9606 GN=SPR PE=1 SV=1	34	7	14	7	28	0.806	1.008	1.176	0.821	0.904	0.8	0.892	1.187	1.271	1984.1	1598.6	2000	2333.7	1629.5	1793.4	1586.8	1769.8	2355.8	2522	0.872	0.4262	0.945	-1.62	0.1543	0.993
P35453	HOXD13	Homeobox protein Hox-D13 OS=Homo sapiens OX=9606 GN=HOXD13 PE=1 SV=3	3	1	1	1	36.1	0.628	0.836	0.749	0.68	0.734	0.685	3.689	1.648	5.176	121	76	101.2	90.7	82.3	88.8	82.9	446.5	199.5	626.4	7.2	1.45097e-06	3.33e-12	-0.398	0.592456	0.997
P35499	SCN4A	Sodium channel protein type 4 subunit alpha OS=Homo sapiens OX=9606 GN=SCN4A PE=1 SV=4	0	1	1	1	207.9	0.716	0.836	1.037	0.995	0.703	0.818	0.932	0.906	0.848	315	225.5	263.5	326.8	313.4	221.4	257.8	293.7	285.3	267.2	0.0347	0.968488	0.971	-0.25	0.776497	0.997
P35527	KRT9	Keratin, type I cytoskeletal 9 OS=Homo sapiens OX=9606 GN=KRT9 PE=1 SV=3	43	19	48	18	62	1.795	1.288	1.271	1.072	1.363	1.568	1.509	1.737	1.463	4034.2	7241.8	5195	5127.4	4324.2	5498.6	6327.5	6087.8	7005.4	5901	0.461	0.556644	0.955	-0.325	0.676841	0.997
P35568	IRS1	Insulin receptor substrate 1 OS=Homo sapiens OX=9606 GN=IRS1 PE=1 SV=1	1	1	1	1	131.5	0.731	0.982	1.441	1.145	0.872	0.839	1.126	1.093	0.811	150.8	110.3	148.1	217.3	172.7	131.6	126.5	169.9	164.8	122.3	0.174	0.905023	0.969	-0.542	0.710996	0.997
P35573	AGL	Glycogen debranching enzyme OS=Homo sapiens OX=9606 GN=AGL PE=1 SV=3	10	16	18	16	174.7	0.879	0.933	0.978	0.93	0.963	1.084	1.114	1.104	1.118	3107.2	2732	2897.5	3039.3	2890.2	2992	3367.3	3461.5	3430.7	3472.7	1.97	0.0128248	0.379	0.774	0.262404	0.995
P35579	MYH9	Myosin-9 OS=Homo sapiens OX=9606 GN=MYH9 PE=1 SV=4	21	36	47	31	226.4	0.597	0.59	0.853	1.162	0.683	1.256	0.695	1.17	0.923	6034.1	3599.4	3561.9	5146.3	7012.1	4121.9	7581.3	4196.2	7057.8	5567.2	1.76	0.228258	0.912	2.99	0.0548917	0.986
P35580	MYH10	Myosin-10 OS=Homo sapiens OX=9606 GN=MYH10 PE=1 SV=3	7	11	12	5	228.9	0.9	0.676	0.687	1.129	0.764	1.246	0.733	1.056	0.949	111.5	100.4	75.4	76.6	125.9	85.2	138.9	81.7	117.7	105.8	1.15	0.346087	0.936	2.62	0.0484122	0.985
P35606	COPB2	Coatomer subunit beta' OS=Homo sapiens OX=9606 GN=COPB2 PE=1 SV=2	30	24	41	24	102.4	0.983	1.096	1.037	0.914	0.99	0.956	0.947	0.953	0.998	6325.6	6218.8	6934.6	6560.8	5781.1	6260.6	6048.2	5993.1	6025.2	6311.9	-0.923	0.125648	0.86	-0.927	0.124133	0.992
P35611	ADD1	Alpha-adducin OS=Homo sapiens OX=9606 GN=ADD1 PE=1 SV=2	8	4	4	4	80.9	0.864	1.505	1.111	0.943	1.057	0.96	0.904	1.09	1.137	584.7	505.2	880	649.8	551.2	617.8	561.3	528.6	637.3	664.5	-0.549	0.623092	0.959	-0.939	0.406299	0.996
P35613	BSG	Basigin OS=Homo sapiens OX=9606 GN=BSG PE=1 SV=2	26	8	11	8	42.2	0.958	0.783	1.048	0.894	1.069	0.931	0.891	1.077	1.006	1742.9	1669.3	1364.6	1827.4	1557.9	1862.4	1623.1	1553.1	1877.2	1753.3	0.41	0.639651	0.96	0.244	0.77981	0.997
P35637	FUS	RNA-binding protein FUS OS=Homo sapiens OX=9606 GN=FUS PE=1 SV=1	21	8	15	6	53.4	1.019	1.058	0.945	1.016	1.059	1.063	0.906	0.881	0.971	569.5	580.5	602.7	537.9	578.5	603.2	605.1	516.2	501.9	552.8	-1.11	0.0786907	0.798	0.62	0.301598	0.995
P35658	NUP214	Nuclear pore complex protein Nup214 OS=Homo sapiens OX=9606 GN=NUP214 PE=1 SV=2	13	18	19	18	213.5	1.034	1.042	0.973	1.007	1.011	1.022	1.065	0.997	1.024	3090.6	3196.3	3220.7	3007.2	3113.2	3123.8	3159.4	3290.7	3082.8	3164.9	0.0721	0.897713	0.969	0.0976	0.861957	0.998
P35754	GLRX	Glutaredoxin-1 OS=Homo sapiens OX=9606 GN=GLRX PE=1 SV=2	10	1	1	1	11.8	0.802	0.815	1.548	0.589	0.532	0.585	0.314	1.186	2.086	391.1	313.5	318.6	605.3	230.2	208.1	228.8	122.7	463.9	815.8	0.777	0.682126	0.962	-2.94	0.140848	0.993
P35790	CHKA	Choline kinase alpha OS=Homo sapiens OX=9606 GN=CHKA PE=1 SV=3	2	1	1	1	52.2	0.989	0.926	1.073	0.952	0.993	0.836	0.986	0.914	1.263	36.5	36.1	33.8	39.2	34.8	36.3	30.5	36	33.4	46.2	0.255	0.7675	0.965	-0.763	0.384423	0.996
P35813	PPM1A	Protein phosphatase 1A OS=Homo sapiens OX=9606 GN=PPM1A PE=1 SV=1	17	5	5	4	42.4	1.083	1.027	1.038	1.005	1.081	0.969	1.08	0.978	1.103	625.3	677.2	641.9	649.2	628.6	675.8	605.9	675.2	611.8	689.7	-0.0889	0.889027	0.969	-0.278	0.664202	0.997
P35908	KRT2	Keratin, type II cytoskeletal 2 epidermal OS=Homo sapiens OX=9606 GN=KRT2 PE=1 SV=2	51	24	47	20	65.4	1.429	1.127	1.36	1.006	1.013	2.047	1.103	1.343	1.228	3704.1	5293.2	4175.1	5038	3726.8	3750.8	7580.5	4085.9	4974.7	4547.5	-0.403	0.709258	0.963	-0.692	0.525209	0.997
P35914	HMGCL	Hydroxymethylglutaryl-CoA lyase, mitochondrial OS=Homo sapiens OX=9606 GN=HMGCL PE=1 SV=2	18	6	7	6	34.3	0.951	1.048	1.24	0.87	0.912	0.8	0.864	1.108	1.169	1315.3	1251.5	1378.8	1630.9	1144	1199.2	1051.7	1136.8	1457.1	1537.8	-0.366	0.692301	0.962	-2.19	0.0344693	0.98
P35968	KDR	Vascular endothelial growth factor receptor 2 OS=Homo sapiens OX=9606 GN=KDR PE=1 SV=2	2	2	4	1	151.4	0.779	1.12	1.209	0.959	1.06	0.819	1.044	1.196	1.061	281.6	219.4	315.3	340.4	270	298.3	230.5	294.1	336.8	298.6	0.698	0.525864	0.953	-0.808	0.464366	0.996
P35998	PSMC2	26S proteasome regulatory subunit 7 OS=Homo sapiens OX=9606 GN=PSMC2 PE=1 SV=3	51	19	35	19	48.6	1.077	1.004	0.965	0.969	1.029	0.98	1.012	1.011	0.986	4748	5115.3	4766.2	4582.9	4600.3	4887.9	4655.1	4807.3	4798.1	4681.9	-0.227	0.697917	0.963	-0.208	0.721823	0.997
P36404	ARL2	ADP-ribosylation factor-like protein 2 OS=Homo sapiens OX=9606 GN=ARL2 PE=1 SV=4	32	5	8	5	20.9	0.976	1.092	1.037	0.958	0.997	0.946	0.917	0.966	0.974	1141.2	1113.4	1245.9	1183.5	1093.5	1137.8	1079.5	1046.4	1101.9	1111.1	-1.04	0.0802875	0.801	-0.707	0.215242	0.994
P36405	ARL3	ADP-ribosylation factor-like protein 3 OS=Homo sapiens OX=9606 GN=ARL3 PE=1 SV=2	47	7	11	7	20.4	0.945	0.994	1.103	0.935	1.103	0.992	0.852	1.07	1.019	1236.7	1169.3	1229.9	1364.4	1155.9	1363.6	1227.3	1053.7	1323.6	1259.7	-0.439	0.599434	0.958	0.0534	0.948712	0.998
P36542	ATP5F1C	ATP synthase subunit gamma, mitochondrial OS=Homo sapiens OX=9606 GN=ATP5F1C PE=1 SV=1	31	9	28	9	33	1	1.093	1.049	0.935	0.914	0.925	0.911	1.023	0.994	5046.7	5044.3	5513.9	5293.2	4720.6	4610.3	4667.8	4597.8	5164.9	5016.1	-0.917	0.116516	0.851	-1.41	0.024177	0.974
P36543	ATP6V1E1	V-type proton ATPase subunit E 1 OS=Homo sapiens OX=9606 GN=ATP6V1E1 PE=1 SV=1	20	5	6	5	26.1	1.11	1.086	0.946	1.064	1.138	1.132	1.104	0.994	0.942	380.6	422.4	413.4	360.2	404.9	433.1	430.9	420.3	378.5	358.5	-0.401	0.599631	0.958	0.862	0.270948	0.995
P36551	CPOX	Oxygen-dependent coproporphyrinogen-III oxidase, mitochondrial OS=Homo sapiens OX=9606 GN=CPOX PE=1 SV=3	20	8	12	8	50.1	1.283	1.03	1.073	1.116	1.095	1.043	0.979	0.797	0.694	1693	2172.1	1743.3	1816.9	1889.7	1853.9	1765	1658.2	1350	1175.1	-2.72	0.00482184	0.201	-0.0451	0.953649	0.998
P36575	ARR3	Arrestin-C OS=Homo sapiens OX=9606 GN=ARR3 PE=1 SV=2	2	1	1	1	42.8	1.21	0.592	1.588	0.929	0.757	0.607	0.49	0.552	0.718	76.8	92.9	45.5	122	71.4	58.1	46.6	37.6	42.4	55.2	-3.78	0.016036	0.41	-2.92	0.0493039	0.985
P36578	RPL4	60S ribosomal protein L4 OS=Homo sapiens OX=9606 GN=RPL4 PE=1 SV=5	22	9	16	9	47.7	0.956	1.095	1.001	1.105	1.05	1.063	1.027	0.947	0.935	2714.2	2595.4	2971.2	2718.2	2999.7	2849.4	2886.4	2788.1	2571.2	2537.6	-0.512	0.426629	0.945	0.902	0.174497	0.994
P36639	NUDT1	7,8-dihydro-8-oxoguanine triphosphatase OS=Homo sapiens OX=9606 GN=NUDT1 PE=1 SV=3	20	3	7	3	22.5	0.999	0.87	1.006	0.959	0.908	0.943	0.896	1.027	0.896	749.5	748.5	651.9	753.8	718.7	680.6	706.7	671.2	770	671.8	-0.345	0.585503	0.957	-0.33	0.601755	0.997
P36776	LONP1	Lon protease homolog, mitochondrial OS=Homo sapiens OX=9606 GN=LONP1 PE=1 SV=2	21	17	29	17	106.4	1.11	1.078	0.945	1.036	1.087	0.998	1.095	1.007	0.904	5476.6	6078	5902.9	5176.6	5676.4	5951.6	5467.1	5995.3	5513.1	4948.8	-0.46	0.559808	0.956	0.133	0.865328	0.998
P36871	PGM1	Phosphoglucomutase-1 OS=Homo sapiens OX=9606 GN=PGM1 PE=1 SV=3	19	9	12	9	61.4	0.772	0.623	1.286	0.772	1.066	0.837	0.724	1.135	1.177	1223.7	944.8	761.9	1573.5	945	1304.3	1024.1	886.4	1389.2	1439.9	0.933	0.54481	0.955	-0.178	0.907108	0.998
P36873	PPP1CC	Serine/threonine-protein phosphatase PP1-gamma catalytic subunit OS=Homo sapiens OX=9606 GN=PPP1CC PE=1 SV=1	16	5	11	1	37	1.138	1.088	1.118	1.526	1.372	1.02	1.476	1.144	0.991	188.1	214.1	204.7	210.3	287.2	258.1	191.9	277.7	215.2	186.3	0.214	0.830073	0.967	0.993	0.330466	0.996
P36915	GNL1	Guanine nucleotide-binding protein-like 1 OS=Homo sapiens OX=9606 GN=GNL1 PE=1 SV=2	8	5	5	5	68.6	0.913	0.678	0.907	0.967	0.647	0.986	0.982	1.065	1.032	332.2	303.2	225.4	301.1	321.4	215	327.4	326.3	353.7	342.7	1.74	0.0483087	0.707	0.452	0.572053	0.997
P36952	SERPINB5	Serpin B5 OS=Homo sapiens OX=9606 GN=SERPINB5 PE=1 SV=2	5	2	2	2	42.1	1.439	0.636	0.527	1.593	1.022	1.192	0.867	0.271	0.646	275.4	396.3	175	145	438.6	281.5	328.2	238.8	74.7	177.8	-1.75	0.267945	0.922	2.88	0.0827976	0.989
P36955	SERPINF1	Pigment epithelium-derived factor OS=Homo sapiens OX=9606 GN=SERPINF1 PE=1 SV=4	5	2	2	2	46.3	1.457	1.402	1.538	0.938	0.765	0.659	0.612	0.668	0.742	333.8	486.4	467.9	513.4	313.2	255.2	219.9	204.1	222.9	247.8	-5.56	3.53856e-06	3.26e-10	-4.89	1.12673e-05	0.000481
P36957	DLST	Dihydrolipoyllysine-residue succinyltransferase component of 2-oxoglutarate dehydrogenase complex, mitochondrial OS=Homo sapiens OX=9606 GN=DLST PE=1 SV=4	26	11	23	11	48.7	1.133	1.166	0.984	0.974	0.944	0.929	0.975	0.888	0.969	4591.7	5204.4	5352.8	4520	4474.5	4336.5	4263.4	4478.2	4077.6	4449.4	-1.65	0.026837	0.559	-1.52	0.0378616	0.982
P36969	GPX4	Phospholipid hydroperoxide glutathione peroxidase OS=Homo sapiens OX=9606 GN=GPX4 PE=1 SV=3	15	3	5	3	22.2	0.994	1.254	0.957	0.94	0.992	0.937	1.094	1.249	1.052	467.5	464.7	586.2	447.3	439.4	463.9	438.2	511.4	584	491.8	0.762	0.339681	0.935	-0.975	0.228196	0.995
P37108	SRP14	Signal recognition particle 14 kDa protein OS=Homo sapiens OX=9606 GN=SRP14 PE=1 SV=2	29	4	9	4	14.6	1.031	0.925	1.005	1.006	0.965	0.947	0.988	0.986	0.999	1751.3	1804.9	1619.6	1760.6	1762.6	1690.3	1658.2	1730.4	1726.7	1748.8	-0.0951	0.86117	0.968	-0.155	0.775448	0.997
P37268	FDFT1	Squalene synthase OS=Homo sapiens OX=9606 GN=FDFT1 PE=1 SV=1	26	9	15	9	48.1	1.012	0.653	1.079	0.924	0.994	1.086	0.926	0.971	0.792	2449.6	2479.5	1600.1	2643.3	2263	2434	2660.8	2269.2	2378.9	1939.3	-0.615	0.520865	0.953	0.568	0.552387	0.997
P37802	TAGLN2	Transgelin-2 OS=Homo sapiens OX=9606 GN=TAGLN2 PE=1 SV=3	55	10	41	10	22.4	0.964	1.049	1.211	0.92	0.791	0.925	1.062	1.2	1.1	3563.4	3435.1	3739.7	4316.3	3279.5	2819.6	3296.4	3784.7	4277.3	3920.5	0.526	0.46169	0.949	-1.97	0.0165345	0.965
P37837	TALDO1	Transaldolase OS=Homo sapiens OX=9606 GN=TALDO1 PE=1 SV=2	34	12	27	12	37.5	0.986	1.047	0.981	0.954	1.041	0.983	0.956	0.962	1.024	6958.9	6859.7	7287.5	6824	6636.2	7244.2	6842.3	6651.8	6695.7	7123.7	-0.395	0.489794	0.951	-0.048	0.932372	0.998
P38117	ETFB	Electron transfer flavoprotein subunit beta OS=Homo sapiens OX=9606 GN=ETFB PE=1 SV=3	50	12	25	12	27.8	1.105	1.134	1.058	0.922	0.982	0.906	1.03	1.033	1.04	5385.4	5952.5	6107.4	5696.9	4965	5290.8	4879.1	5544.8	5562.7	5602.4	-0.728	0.191734	0.899	-1.81	0.00572663	0.911
P38159	RBMX	RNA-binding motif protein, X chromosome OS=Homo sapiens OX=9606 GN=RBMX PE=1 SV=3	43	18	42	4	42.3	1.024	0.928	0.924	1.124	1.112	1.041	1.101	1.047	0.994	1265	1295.6	1173.5	1169	1421.8	1406.4	1316.7	1392.2	1324.5	1258	0.932	0.162894	0.885	1.64	0.0239121	0.974
P38606	ATP6V1A	V-type proton ATPase catalytic subunit A OS=Homo sapiens OX=9606 GN=ATP6V1A PE=1 SV=2	31	16	28	16	68.3	1.009	1.051	0.967	0.995	1.072	1.369	1.025	1.079	0.905	3856.1	3890.6	4054.2	3728	3838.3	4132.7	5279.8	3950.7	4160.6	3491	-0.0498	0.952493	0.971	1.18	0.179109	0.994
P38646	HSPA9	Stress-70 protein, mitochondrial OS=Homo sapiens OX=9606 GN=HSPA9 PE=1 SV=2	47	27	86	26	73.6	1.102	1.018	0.917	0.989	1.052	0.994	1.046	0.926	0.937	15398.3	16962	15682.8	14114.1	15226.4	16204.9	15312.7	16104.3	14264.7	14424.7	-0.536	0.479337	0.95	0.0869	0.90745	0.998
P38919	EIF4A3	Eukaryotic initiation factor 4A-III OS=Homo sapiens OX=9606 GN=EIF4A3 PE=1 SV=4	33	12	20	10	46.8	1.069	0.963	0.934	1.012	1.03	0.995	1.038	0.945	0.95	1658.7	1774	1597.5	1549.9	1678	1707.7	1650.5	1721.9	1566.8	1575.1	-0.204	0.757722	0.965	0.374	0.572877	0.997
P38935	IGHMBP2	DNA-binding protein SMUBP-2 OS=Homo sapiens OX=9606 GN=IGHMBP2 PE=1 SV=3	2	2	2	2	109.1	1.049	0.927	0.888	0.889	0.939	0.741	1.057	0.969	1.019	175.4	184	162.7	155.7	156.1	164.8	130.1	185.5	170	178.7	0.554	0.455422	0.948	-1.06	0.169199	0.993
P38936	CDKN1A	Cyclin-dependent kinase inhibitor 1 OS=Homo sapiens OX=9606 GN=CDKN1A PE=1 SV=3	11	1	1	1	18.1	0.521	1.894	2.521	0.448	0.463	0.363	0.615	0.475	1.753	60	31.2	113.6	151.2	26.9	27.7	21.8	36.9	28.5	105.2	-2.66	0.239014	0.915	-5.24	0.0334305	0.98
P39019	RPS19	40S ribosomal protein S19 OS=Homo sapiens OX=9606 GN=RPS19 PE=1 SV=2	46	7	24	7	16.1	1.063	0.992	0.958	1.106	1.002	1.052	1.015	1.049	0.98	3248.4	3454.2	3220.8	3113	3591.8	3254.3	3418	3298.3	3406	3182	0.0449	0.941521	0.97	0.71	0.261516	0.995
P39023	RPL3	60S ribosomal protein L3 OS=Homo sapiens OX=9606 GN=RPL3 PE=1 SV=2	34	14	24	14	46.1	0.981	1.173	0.935	1.073	1.035	1.039	1.049	1.033	1.015	4566.8	4481.9	5356.1	4271.5	4899.1	4725.6	4743.7	4788.6	4717.2	4635.3	0.149	0.827006	0.967	0.583	0.400463	0.996
P39656	DDOST	Dolichyl-diphosphooligosaccharide--protein glycosyltransferase 48 kDa subunit OS=Homo sapiens OX=9606 GN=DDOST PE=1 SV=4	17	8	20	8	50.8	1.034	1.028	0.989	0.973	0.996	0.908	0.943	1.048	0.958	2677.1	2768.3	2751.3	2648.5	2604.8	2667.4	2430.2	2524.9	2805.9	2565.5	-0.51	0.385712	0.941	-0.665	0.264046	0.995
P39687	ANP32A	Acidic leucine-rich nuclear phosphoprotein 32 family member A OS=Homo sapiens OX=9606 GN=ANP32A PE=1 SV=1	13	3	5	3	28.6	0.786	0.756	1.139	0.769	0.693	0.765	0.663	1.067	1.339	853.7	670.7	645.4	972.5	656.2	591.5	653.2	566	911	1143.3	0.962	0.465349	0.949	-1.45	0.278514	0.995
P39748	FEN1	Flap endonuclease 1 OS=Homo sapiens OX=9606 GN=FEN1 PE=1 SV=1	37	11	17	11	42.6	1.051	1.021	0.904	1.213	1.205	1.138	1.128	1.088	0.979	2629.2	2764.3	2685.2	2376.3	3188.5	3168.1	2991.4	2964.4	2861.5	2572.7	0.729	0.314349	0.931	2.01	0.0150172	0.962
P39880	CUX1	Homeobox protein cut-like 1 OS=Homo sapiens OX=9606 GN=CUX1 PE=1 SV=3	8	9	10	5	164.1	0.892	0.782	0.873	0.918	0.821	0.997	0.959	1.121	1.202	366.6	326.9	286.7	319.9	336.6	301.1	365.4	351.7	411	440.5	2.29	0.00911533	0.322	0.602	0.417745	0.996
P40222	TXLNA	Alpha-taxilin OS=Homo sapiens OX=9606 GN=TXLNA PE=1 SV=3	26	10	14	10	61.9	1.026	0.868	0.929	1.028	0.86	1.057	1.073	1.061	1.137	1313.3	1347.1	1140.2	1220.5	1349.5	1129.7	1387.9	1409.1	1393.6	1493.4	1.5	0.0696239	0.778	0.538	0.484292	0.997
P40227	CCT6A	T-complex protein 1 subunit zeta OS=Homo sapiens OX=9606 GN=CCT6A PE=1 SV=3	27	15	36	15	58	1.107	1.039	0.975	0.999	1.059	1.016	1.051	0.974	0.945	7660.3	8481.5	7961.8	7469.2	7653.5	8113.9	7782.5	8049	7463.3	7235.8	-0.612	0.364913	0.939	-0.0373	0.954988	0.998
P40306	PSMB10	Proteasome subunit beta type-10 OS=Homo sapiens OX=9606 GN=PSMB10 PE=1 SV=1	3	1	1	1	28.9	0.581	1.13	1.641	0.808	1.106	0.767	0.594	1.162	0.972	458.8	266.5	518.5	753.1	370.9	507.3	352	272.4	533.1	446.1	-1.19	0.496622	0.951	-1.52	0.389521	0.996
P40429	RPL13A	60S ribosomal protein L13a OS=Homo sapiens OX=9606 GN=RPL13A PE=1 SV=2	26	6	17	6	23.6	1.026	1.135	1.006	1.007	1.039	1.031	1.052	0.961	1.083	5441.8	5583.1	6173.9	5474.6	5478.7	5655.1	5608.7	5725.5	5227.9	5892.7	-0.3	0.629447	0.959	-0.116	0.850629	0.998
P40616	ARL1	ADP-ribosylation factor-like protein 1 OS=Homo sapiens OX=9606 GN=ARL1 PE=1 SV=1	18	3	3	3	20.4	0.928	0.888	1.034	1.029	0.857	0.965	0.87	0.834	1.009	237.4	220.2	210.9	245.4	244.3	203.4	229.1	206.5	198	239.6	-0.581	0.446954	0.947	0.101	0.893385	0.998
P40692	MLH1	DNA mismatch repair protein Mlh1 OS=Homo sapiens OX=9606 GN=MLH1 PE=1 SV=1	12	8	10	8	84.5	1.039	1.038	0.997	0.96	0.988	0.949	1.008	1.058	1.033	2055.3	2136	2134.3	2049.2	1972.9	2029.9	1950	2071.3	2174	2123.9	0.00823	0.986924	0.971	-0.678	0.196251	0.994
P40763	STAT3	Signal transducer and activator of transcription 3 OS=Homo sapiens OX=9606 GN=STAT3 PE=1 SV=2	6	4	5	4	88	0.803	1.116	1.097	1.016	0.998	1.016	0.802	1.023	1.054	797.5	640	889.8	874.7	810.1	795.7	810.5	639.8	815.7	840.5	-0.567	0.55691	0.955	0.219	0.819257	0.997
P40818	USP8	Ubiquitin carboxyl-terminal hydrolase 8 OS=Homo sapiens OX=9606 GN=USP8 PE=1 SV=1	2	1	1	1	127.4	0.773	0.879	0.697	0.845	0.72	0.912	0.812	0.885	1.024	32.8	25.3	28.8	22.8	27.7	23.6	29.9	26.6	29	33.6	0.843	0.254475	0.919	0.207	0.772612	0.997
P40855	PEX19	Peroxisomal biogenesis factor 19 OS=Homo sapiens OX=9606 GN=PEX19 PE=1 SV=1	36	7	7	7	32.8	0.978	1.112	1.015	0.986	1.228	0.947	1.09	1.212	1.111	995.9	974.1	1107.2	1011.3	982	1222.7	943.3	1086	1207.5	1106.6	1	0.219508	0.909	0.153	0.845329	0.998
P40925	MDH1	Malate dehydrogenase, cytoplasmic OS=Homo sapiens OX=9606 GN=MDH1 PE=1 SV=4	28	9	26	9	36.4	0.97	1.066	0.933	0.977	1.074	1.027	1.015	0.95	0.918	3159.5	3066.3	3367.2	2948	3088.4	3391.9	3244.8	3208	3003	2901.8	-0.32	0.631146	0.96	0.58	0.390838	0.996
P40926	MDH2	Malate dehydrogenase, mitochondrial OS=Homo sapiens OX=9606 GN=MDH2 PE=1 SV=3	60	17	67	17	35.5	1.039	1.147	1.001	1.012	1.092	1.038	0.91	0.901	0.971	11467.6	11914.4	13150.1	11479.9	11602.6	12520.9	11903.8	10430.2	10330.8	11130.1	-1.59	0.0194928	0.466	0.0643	0.91315	0.998
P40937	RFC5	Replication factor C subunit 5 OS=Homo sapiens OX=9606 GN=RFC5 PE=1 SV=1	36	12	21	12	38.5	0.999	0.918	1.001	1.023	1.084	1.037	1.022	1.047	0.974	3320.7	3316.4	3047.6	3323.4	3398.1	3599.5	3442.2	3392.9	3477.2	3233.3	0.415	0.458968	0.948	1.01	0.0899806	0.99
P40938	RFC3	Replication factor C subunit 3 OS=Homo sapiens OX=9606 GN=RFC3 PE=1 SV=2	21	6	7	6	40.5	0.95	0.831	0.938	1.019	1.027	1.009	1.002	1.028	0.936	1087.7	1032.9	904.3	1020.5	1108.5	1117.2	1097.9	1089.7	1118	1018.1	0.828	0.15252	0.879	1.36	0.0289153	0.978
P40939	HADHA	Trifunctional enzyme subunit alpha, mitochondrial OS=Homo sapiens OX=9606 GN=HADHA PE=1 SV=2	39	25	50	25	82.9	0.968	1.065	1.091	0.957	1.045	0.966	0.958	0.98	1.032	8400.7	8134.2	8944.8	9163.7	8041.9	8782.2	8112.6	8048.6	8230.9	8672.1	-0.673	0.279137	0.924	-0.486	0.428094	0.996
P41091	EIF2S3	Eukaryotic translation initiation factor 2 subunit 3 OS=Homo sapiens OX=9606 GN=EIF2S3 PE=1 SV=3	34	14	26	14	51.1	1.052	1.044	0.956	0.984	1.019	0.986	0.994	0.945	1.009	5393.5	5672.9	5630.3	5158.6	5306.2	5493.8	5316.3	5362.4	5098.1	5444.1	-0.514	0.380348	0.94	-0.163	0.776802	0.997
P41162	ETV3	ETS translocation variant 3 OS=Homo sapiens OX=9606 GN=ETV3 PE=1 SV=2	2	1	2	1	57	1.002	0.993	0.87	1.106	1.101	0.995	1.197	1.051	0.849	93.9	94.1	93.2	81.6	103.8	103.4	93.5	112.4	98.6	79.7	0.798	0.391379	0.942	1.38	0.15093	0.993
P41208	CETN2	Centrin-2 OS=Homo sapiens OX=9606 GN=CETN2 PE=1 SV=1	24	4	4	4	19.7	1.051	1.053	1.049	0.97	1.075	0.972	0.968	0.976	1.058	313.5	329.5	330.2	328.9	304.2	337.1	304.7	303.3	306.1	331.6	-0.739	0.217134	0.908	-0.47	0.422334	0.996
P41214	EIF2D	Eukaryotic translation initiation factor 2D OS=Homo sapiens OX=9606 GN=EIF2D PE=1 SV=3	15	7	10	7	64.7	0.933	1.159	1.068	0.955	1.002	0.923	0.985	1.053	1.047	1430.9	1334.7	1658	1528.8	1365.9	1433.5	1320.5	1409.6	1507	1498	-0.217	0.74901	0.964	-0.896	0.204541	0.994
P41223	BUD31	Protein BUD31 homolog OS=Homo sapiens OX=9606 GN=BUD31 PE=1 SV=2	13	2	3	2	17	1.032	1.046	0.922	1.035	1.163	1.152	1.072	0.961	0.953	236.1	243.6	247.1	217.7	244.3	274.7	272.1	253.2	227	225.1	-0.111	0.878325	0.969	1.35	0.0849421	0.99
P41227	NAA10	N-alpha-acetyltransferase 10 OS=Homo sapiens OX=9606 GN=NAA10 PE=1 SV=1	16	4	6	4	26.4	1.086	0.975	1.041	0.889	0.982	0.985	1.036	0.947	1.294	523.4	568.4	510.3	545.1	465.3	513.8	515.6	542.5	495.5	677.6	0.192	0.812271	0.967	-0.949	0.254964	0.995
P41229	KDM5C	Lysine-specific demethylase 5C OS=Homo sapiens OX=9606 GN=KDM5C PE=1 SV=2	3	4	4	4	175.6	1.107	0.921	1.01	0.978	1.066	0.945	1.075	1.054	1.026	607.3	672.5	559.2	613.1	594.2	647.4	573.7	652.8	640	623.3	0.37	0.60243	0.958	-0.163	0.817329	0.997
P41236	PPP1R2	Protein phosphatase inhibitor 2 OS=Homo sapiens OX=9606 GN=PPP1R2 PE=1 SV=2	30	3	3	3	23	0.789	1.155	1.013	0.765	0.664	0.844	0.904	0.893	1.127	37.2	29.4	43	37.7	28.5	24.7	31.4	33.7	33.3	42	-0.3	0.759219	0.965	-2.06	0.0552574	0.986
P41240	CSK	Tyrosine-protein kinase CSK OS=Homo sapiens OX=9606 GN=CSK PE=1 SV=1	24	10	13	10	50.7	0.978	1.158	1.053	0.838	0.923	0.896	0.906	0.99	1.072	2082.1	2035.3	2410.2	2191.8	1745.6	1921.1	1865.4	1885.9	2060.2	2231.2	-0.888	0.206556	0.905	-1.91	0.0157143	0.963
P41250	GARS1	Glycine--tRNA ligase OS=Homo sapiens OX=9606 GN=GARS1 PE=1 SV=3	19	14	23	14	83.1	1.178	0.995	0.867	1.022	0.969	1.045	1.129	0.948	0.776	3453.1	4066.7	3435.6	2995.3	3530	3344.5	3607.8	3899.8	3272.5	2680.8	-0.525	0.619601	0.959	0.149	0.887217	0.998
P41252	IARS1	Isoleucine--tRNA ligase, cytoplasmic OS=Homo sapiens OX=9606 GN=IARS1 PE=1 SV=2	23	26	44	26	144.4	1.009	0.758	0.869	1.04	0.91	1.088	1.016	1.028	0.895	6659.9	6721.4	5045.6	5788.4	6928.9	6058.5	7248.3	6766.5	6848.9	5960.5	0.875	0.306429	0.93	1.37	0.122097	0.992
P41567	EIF1	Eukaryotic translation initiation factor 1 OS=Homo sapiens OX=9606 GN=EIF1 PE=1 SV=1	27	2	3	2	12.7	0.922	0.954	1.045	0.943	0.948	0.899	0.911	0.983	1.037	432.4	398.9	412.6	451.9	407.6	410	388.8	393.9	424.9	448.2	-0.0955	0.873407	0.969	-0.507	0.405392	0.996
P41743	PRKCI	Protein kinase C iota type OS=Homo sapiens OX=9606 GN=PRKCI PE=1 SV=2	9	4	4	4	68.2	1.076	1.11	0.967	0.964	1.044	1.079	0.945	0.924	1.214	512	550.7	568.1	495	493.4	534.5	552.7	483.9	473.2	621.7	-0.581	0.497533	0.951	-0.106	0.900773	0.998
P42025	ACTR1B	Beta-centractin OS=Homo sapiens OX=9606 GN=ACTR1B PE=1 SV=1	11	4	8	2	42.3	0.921	1.064	1.13	0.963	1.094	1.041	1.061	1.141	1.085	268.4	247.4	285.6	303.3	258.6	293.7	279.5	284.7	306.4	291.4	0.652	0.381213	0.941	0.145	0.842609	0.998
P42126	ECI1	Enoyl-CoA delta isomerase 1, mitochondrial OS=Homo sapiens OX=9606 GN=ECI1 PE=1 SV=1	23	7	10	7	32.8	1.021	1.217	0.998	1.064	1.101	1.002	1.07	1.024	0.923	2244.2	2290.9	2731.3	2240.1	2387.7	2470.9	2247.8	2401	2298.4	2070.9	-0.624	0.401661	0.943	0.11	0.880282	0.998
P42166	TMPO	Lamina-associated polypeptide 2, isoform alpha OS=Homo sapiens OX=9606 GN=TMPO PE=1 SV=2	43	23	41	18	75.4	0.931	0.851	0.906	1.029	1.001	1.006	1.068	1.131	0.995	2923.9	2723	2488.2	2647.7	3008.1	2927.4	2942.1	3121.6	3305.9	2908.7	1.81	0.00846581	0.309	1.42	0.0283317	0.977
P42167	TMPO.1	Lamina-associated polypeptide 2, isoforms beta/gamma OS=Homo sapiens OX=9606 GN=TMPO PE=1 SV=2	32	10	18	5	50.6	0.808	0.738	0.829	1.197	0.93	1.124	0.89	1.189	0.952	1123.8	908.2	829.3	931.2	1344.8	1044.6	1263.1	1000.5	1335.8	1069.5	1.86	0.072478	0.784	2.9	0.0106098	0.949
P42224	STAT1	Signal transducer and activator of transcription 1-alpha/beta OS=Homo sapiens OX=9606 GN=STAT1 PE=1 SV=2	30	18	24	18	87.3	1.082	0.923	0.897	1.146	1.158	1.17	1.089	0.871	0.846	3101.2	3356.2	2862.6	2782.4	3554.5	3590.9	3628.5	3376	2699.8	2622.7	-0.315	0.722557	0.963	2.09	0.0352104	0.981
P42226	STAT6	Signal transducer and activator of transcription 6 OS=Homo sapiens OX=9606 GN=STAT6 PE=1 SV=1	9	6	6	6	94.1	0.864	1.084	1.506	0.788	0.837	0.843	0.77	1.219	0.913	1675.7	1447.8	1815.9	2524.1	1321.1	1403.3	1412.1	1290.3	2042.6	1530	-1.25	0.33385	0.934	-2.66	0.05545	0.986
P42285	MTREX	Exosome RNA helicase MTR4 OS=Homo sapiens OX=9606 GN=MTREX PE=1 SV=3	17	17	22	17	117.7	0.915	0.914	0.98	0.965	1.034	1.015	0.902	1.062	1.041	3349.1	3064.4	3059.6	3282.8	3232.8	3462.4	3400.9	3021.1	3556.7	3485.5	0.627	0.334341	0.934	0.906	0.1733	0.994
P42338	PIK3CB	Phosphatidylinositol 4,5-bisphosphate 3-kinase catalytic subunit beta isoform OS=Homo sapiens OX=9606 GN=PIK3CB PE=1 SV=1	3	3	5	3	122.7	1.02	1.133	1.099	1.103	1.009	1.024	1.116	1.015	0.974	477.3	487	540.5	524.6	526.2	481.8	488.8	532.4	484.4	465	-0.532	0.431271	0.946	-0.181	0.786269	0.997
P42356	PI4KA	Phosphatidylinositol 4-kinase alpha OS=Homo sapiens OX=9606 GN=PI4KA PE=1 SV=4	2	3	3	3	236.7	1.063	0.631	0.961	0.852	0.89	0.953	1.002	1.087	1.051	120.1	127.6	75.7	115.4	102.3	106.9	114.4	120.3	130.5	126.2	1.21	0.173846	0.891	-0.404	0.634705	0.997
P42566	EPS15	Epidermal growth factor receptor substrate 15 OS=Homo sapiens OX=9606 GN=EPS15 PE=1 SV=2	22	13	14	13	98.6	1.113	0.993	0.88	1.195	0.988	1.114	1.059	0.835	0.822	1306.7	1453.9	1298	1150.1	1561.1	1291.7	1455.4	1384.4	1090.7	1074.1	-0.864	0.389777	0.942	1.17	0.24979	0.995
P42574	CASP3	Caspase-3 OS=Homo sapiens OX=9606 GN=CASP3 PE=1 SV=2	18	4	5	4	31.6	1.05	1.061	0.957	1.061	1.185	1.168	1.068	0.928	0.938	640.6	672.7	679.5	612.8	679.5	759.3	748.1	684.1	594.4	600.8	-0.545	0.454056	0.948	1.29	0.0937343	0.99
P42694	HELZ	Probable helicase with zinc finger domain OS=Homo sapiens OX=9606 GN=HELZ PE=1 SV=2	3	5	5	5	218.8	1.053	0.999	1.065	0.985	0.946	0.963	1.079	0.974	1.103	410.9	432.6	410.4	437.5	404.7	388.9	395.6	443.5	400.3	453.4	0.00545	0.992679	0.972	-0.853	0.17186	0.993
P42695	NCAPD3	Condensin-2 complex subunit D3 OS=Homo sapiens OX=9606 GN=NCAPD3 PE=1 SV=2	3	3	3	3	168.8	1.058	0.769	0.901	1.284	0.996	1.17	1.152	1.103	0.856	156	165	119.9	140.6	200.3	155.4	182.5	179.8	172	133.5	1.21	0.272057	0.923	2.28	0.0530397	0.986
P42696	RBM34	RNA-binding protein 34 OS=Homo sapiens OX=9606 GN=RBM34 PE=1 SV=2	13	5	6	5	48.5	1.011	0.963	0.987	1.035	0.93	0.973	1.048	1.063	1.124	408.9	413.2	393.6	403.4	423.4	380.2	397.7	428.5	434.7	459.8	0.924	0.115397	0.85	-0.0163	0.976337	0.998
P42704	LRPPRC	Leucine-rich PPR motif-containing protein, mitochondrial OS=Homo sapiens OX=9606 GN=LRPPRC PE=1 SV=3	32	40	76	40	157.8	1.016	0.845	0.953	1.026	1.028	1.028	0.982	0.905	1.009	12443.4	12642.9	10508.8	11864.5	12768.9	12789.9	12796.7	12221.8	11266	12559.1	0.114	0.854633	0.968	1.1	0.100426	0.991
P42765	ACAA2	3-ketoacyl-CoA thiolase, mitochondrial OS=Homo sapiens OX=9606 GN=ACAA2 PE=1 SV=2	7	1	1	1	41.9	1.036	1.106	0.775	0.925	1.004	0.956	1.031	0.941	1.1	38.3	39.7	42.4	29.7	35.4	38.5	36.6	39.5	36	42.1	0.313	0.722837	0.964	-0.273	0.757038	0.997
P42766	RPL35	60S ribosomal protein L35 OS=Homo sapiens OX=9606 GN=RPL35 PE=1 SV=2	20	3	5	3	14.5	0.951	1.073	1.058	0.99	0.984	1.073	1.149	0.938	1.018	869.6	827.2	932.9	920.1	861.2	855.7	933	999.2	815.5	885.5	0.0188	0.980977	0.971	0.0361	0.963451	0.998
P42771	CDKN2A	Cyclin-dependent kinase inhibitor 2A OS=Homo sapiens OX=9606 GN=CDKN2A PE=1 SV=2	15	2	2	2	16.5	0.391	0.254	1.566	0.159	0.258	0.198	0.142	1.697	2.462	390.4	152.6	99.2	611.3	62.2	100.6	77.3	55.3	662.5	961.3	2.57	0.281728	0.925	-2.68	0.263299	0.995
P42773	CDKN2C	Cyclin-dependent kinase 4 inhibitor C OS=Homo sapiens OX=9606 GN=CDKN2C PE=1 SV=1	11	2	2	2	18.1	0.913	0.982	1.023	1.011	1.211	1.018	1.225	0.962	0.939	229.7	209.6	225.4	234.8	232.3	278.1	233.7	281.4	220.9	215.8	0.61	0.507304	0.952	1.25	0.188121	0.994
P42858	HTT	Huntingtin OS=Homo sapiens OX=9606 GN=HTT PE=1 SV=2	1	2	2	2	347.4	0.986	0.695	0.905	1.023	1.008	0.992	1.052	1.467	1.132	130.2	128.4	90.4	117.9	133.2	131.2	129.1	137	191	147.4	2.81	0.00341507	0.153	1.42	0.0830785	0.99
P43003	SLC1A3	Excitatory amino acid transporter 1 OS=Homo sapiens OX=9606 GN=SLC1A3 PE=1 SV=1	1	1	1	1	59.5	1.219	0.821	0.89	1.129	0.922	1.013	1.25	0.948	0.937	216.3	263.7	177.6	192.4	244.1	199.3	219.2	270.3	205.1	202.7	0.506	0.680336	0.962	0.609	0.621	0.997
P43007	SLC1A4	Neutral amino acid transporter A OS=Homo sapiens OX=9606 GN=SLC1A4 PE=1 SV=1	2	1	1	1	55.7	0.851	0.6	0.753	1.209	0.703	1.288	0.884	1.208	0.748	66.8	56.9	40.1	50.3	80.8	47	86	59	80.7	50	1.64	0.258099	0.92	2.92	0.0589257	0.987
P43034	PAFAH1B1	Platelet-activating factor acetylhydrolase IB subunit alpha OS=Homo sapiens OX=9606 GN=PAFAH1B1 PE=1 SV=2	30	11	17	11	46.6	1.093	1.079	0.996	0.968	1.035	1.016	1.009	0.99	1.007	3311.7	3621.2	3572.3	3298.1	3206.1	3426.5	3364.1	3339.9	3277.4	3334.9	-0.69	0.247887	0.917	-0.454	0.437887	0.996
P43080	GUCA1A	Guanylyl cyclase-activating protein 1 OS=Homo sapiens OX=9606 GN=GUCA1A PE=1 SV=3	4	1	3	1	22.9	0.624	1.029	1.111	0.89	0.759	0.652	0.743	0.858	0.842	221.4	138.2	227.8	246.1	197.1	168.1	144.3	164.6	190	186.5	-1.4	0.174014	0.891	-1.67	0.110994	0.991
P43155	CRAT	Carnitine O-acetyltransferase OS=Homo sapiens OX=9606 GN=CRAT PE=1 SV=5	14	8	9	8	70.8	0.793	1.104	1.264	0.903	0.935	0.851	0.989	1.1	1.215	2021	1602.2	2230.9	2554.2	1824.4	1890.6	1720.4	1999.6	2223.9	2454.9	0.502	0.619834	0.959	-1.58	0.138715	0.993
P43243	MATR3	Matrin-3 OS=Homo sapiens OX=9606 GN=MATR3 PE=1 SV=2	19	16	24	16	94.6	1.014	0.844	0.958	0.96	0.831	0.944	1.046	1.044	1.051	3877.3	3930.2	3271.9	3712.8	3724	3223.6	3660.5	4056.6	4046.8	4074.6	1.09	0.107538	0.841	-0.368	0.562341	0.997
P43304	GPD2	Glycerol-3-phosphate dehydrogenase, mitochondrial OS=Homo sapiens OX=9606 GN=GPD2 PE=1 SV=3	15	11	12	11	80.8	1.5	1.073	0.895	0.903	1.003	0.606	1.214	1.143	1.108	1247.8	1871.5	1339.4	1117.4	1127.4	1251.5	755.8	1514.5	1426.7	1382.5	0.541	0.637458	0.96	-2.31	0.0646685	0.988
P43307	SSR1	Translocon-associated protein subunit alpha OS=Homo sapiens OX=9606 GN=SSR1 PE=1 SV=3	21	4	6	4	32.2	0.991	1.089	0.965	0.97	1.089	0.96	0.891	0.98	0.996	948	939.1	1032.5	914.7	919.7	1032.3	909.6	844.8	929.2	944.2	-0.782	0.256751	0.919	-8.69e-05	0.999896	0.998
P43355	MAGEA1	Melanoma-associated antigen 1 OS=Homo sapiens OX=9606 GN=MAGEA1 PE=1 SV=1	22	8	10	6	34.3	0.164	0.923	1.078	1.121	1.209	1.276	1.019	1.175	1.076	1110.8	182.7	1025.8	1197.4	1245.5	1343.1	1417	1132.1	1304.9	1195.2	2.22	0.0611927	0.755	3.38	0.00936469	0.943
P43356	MAGEA2	Melanoma-associated antigen 2 OS=Homo sapiens OX=9606 GN=MAGEA2 PE=1 SV=1	5	1	1	1	35	0.827	1.005	1.267	0.693	1.034	1.15	1.201	1.134	1.1	17.1	14.2	17.2	21.7	11.9	17.7	19.7	20.6	19.4	18.8	1.28	0.322397	0.932	-0.267	0.832727	0.998
P43358	MAGEA4	Melanoma-associated antigen 4 OS=Homo sapiens OX=9606 GN=MAGEA4 PE=1 SV=2	30	9	24	7	34.9	1.16	1.004	1.02	1.032	1.001	1.011	1.258	0.815	0.868	4866	5646.8	4884.2	4961.8	5021.3	4872.2	4919.5	6123.5	3967.7	4224.7	-0.974	0.369355	0.939	-0.338	0.750901	0.997
P43405	SYK	Tyrosine-protein kinase SYK OS=Homo sapiens OX=9606 GN=SYK PE=1 SV=1	6	2	2	2	72	1.173	1.299	0.947	0.84	1.014	0.975	0.956	1.223	1.111	294.4	345.5	382.6	278.7	247.3	298.5	287.2	281.5	360	327.1	-0.351	0.719674	0.963	-1.7	0.102847	0.991
P43487	RANBP1	Ran-specific GTPase-activating protein OS=Homo sapiens OX=9606 GN=RANBP1 PE=1 SV=1	43	5	17	5	23.3	1.004	0.944	0.9	0.972	0.945	0.959	1.011	0.965	0.966	1901.4	1909	1795.8	1710.6	1847.9	1797.6	1823.6	1921.9	1833.9	1836.4	0.257	0.647693	0.96	0.086	0.878081	0.998
P43490	NAMPT	Nicotinamide phosphoribosyltransferase OS=Homo sapiens OX=9606 GN=NAMPT PE=1 SV=1	30	13	23	13	55.5	0.972	2.062	1.001	1.058	1.627	1.258	1.069	0.927	0.86	4325.7	4205.4	8920.3	4328	4577.3	7039.8	5443.6	4625.1	4008.1	3721.5	-1.68	0.190709	0.899	1.07	0.394916	0.996
P43686	PSMC4	26S proteasome regulatory subunit 6B OS=Homo sapiens OX=9606 GN=PSMC4 PE=1 SV=2	30	11	23	10	47.3	1.1	1.064	0.982	0.98	1.037	0.989	1.027	0.994	0.954	2027.8	2230.2	2156.7	1991.2	1986.4	2103.6	2004.5	2082.6	2016.7	1933.8	-0.691	0.274182	0.923	-0.432	0.486587	0.997
P43897	TSFM	Elongation factor Ts, mitochondrial OS=Homo sapiens OX=9606 GN=TSFM PE=1 SV=2	31	8	16	8	35.4	1.042	1.19	1.003	0.965	1.047	0.953	0.985	0.99	1.039	1609.1	1676.8	1914.5	1613.9	1552.2	1684.9	1533.5	1584.3	1592.7	1671.6	-0.809	0.215583	0.908	-0.831	0.20427	0.994
P45877	PPIC	Peptidyl-prolyl cis-trans isomerase C OS=Homo sapiens OX=9606 GN=PPIC PE=1 SV=1	6	1	2	1	22.7	0.886	0.958	1.208	0.725	0.804	0.772	0.693	1.244	1.257	336.9	298.4	322.8	407	244.2	270.7	260.1	233.5	419.2	423.5	0.399	0.752781	0.965	-2.27	0.0952789	0.99
P45880	VDAC2	Voltage-dependent anion-selective channel protein 2 OS=Homo sapiens OX=9606 GN=VDAC2 PE=1 SV=2	51	12	27	12	31.5	1.032	1.064	0.985	0.914	1.026	0.972	0.978	0.974	0.953	3748.8	3869.4	3990	3694.1	3425.9	3844.6	3642	3665.4	3651.5	3572.2	-0.767	0.212948	0.907	-0.613	0.312205	0.995
P45954	ACADSB	Short/branched chain specific acyl-CoA dehydrogenase, mitochondrial OS=Homo sapiens OX=9606 GN=ACADSB PE=1 SV=1	25	8	12	8	47.5	1.175	1.128	1.198	1.118	1.291	1.002	1.055	0.977	0.887	1665.4	1956.1	1879.2	1995.6	1862.7	2150.4	1669	1756.3	1627.5	1477.8	-1.91	0.0263062	0.554	-0.228	0.762433	0.997
P45973	CBX5	Chromobox protein homolog 5 OS=Homo sapiens OX=9606 GN=CBX5 PE=1 SV=1	18	4	7	4	22.2	0.328	0.21	0.2	0.321	0.245	0.281	0.258	0.21	0.291	4884.2	1603.1	1023.5	977.3	1568.2	1195.3	1374.5	1261.9	1026.3	1419.2	-0.0261	0.956568	0.971	-0.128	0.790173	0.997
P45974	USP5	Ubiquitin carboxyl-terminal hydrolase 5 OS=Homo sapiens OX=9606 GN=USP5 PE=1 SV=2	24	17	31	17	95.7	0.965	1.056	1.053	0.92	1.037	0.968	0.959	1.042	1.025	3810.8	3678.5	4025.3	4012.4	3506.7	3953	3687.8	3655.8	3971.4	3904.4	-0.262	0.673431	0.961	-0.498	0.428444	0.996
P45983	MAPK8	Mitogen-activated protein kinase 8 OS=Homo sapiens OX=9606 GN=MAPK8 PE=1 SV=2	4	2	2	1	48.3	0.955	0.961	0.984	0.889	0.779	0.867	1.044	0.943	1.094	222.1	212	213.5	218.7	197.4	173	192.5	231.9	209.5	242.9	0.612	0.321832	0.932	-1.27	0.0564497	0.986
P45984	MAPK9	Mitogen-activated protein kinase 9 OS=Homo sapiens OX=9606 GN=MAPK9 PE=1 SV=2	4	2	2	1	48.1	0.999	1.253	1.23	1.028	1.106	0.89	1.174	1.067	1.193	144.7	144.5	181.3	178	148.8	160	128.7	169.9	154.4	172.6	0.0208	0.979954	0.971	-1.16	0.180218	0.994
P45985	MAP2K4	Dual specificity mitogen-activated protein kinase kinase 4 OS=Homo sapiens OX=9606 GN=MAP2K4 PE=1 SV=1	6	3	4	3	44.3	0.916	1.065	1.061	0.907	0.945	0.926	0.974	0.96	1.04	373.3	342	397.7	396.1	338.6	352.6	345.7	363.6	358.4	388.1	-0.331	0.601214	0.958	-0.993	0.136067	0.992
P46013	MKI67	Proliferation marker protein Ki-67 OS=Homo sapiens OX=9606 GN=MKI67 PE=1 SV=2	22	53	68	53	358.5	1.233	0.922	0.845	1.138	0.917	1.157	1.09	0.909	0.816	12935.1	15944.8	11927.9	10928.3	14716.6	11859.3	14961.6	14101.2	11757.6	10554.5	-0.495	0.684158	0.962	0.915	0.457088	0.996
P46019	PHKA2	Phosphorylase b kinase regulatory subunit alpha, liver isoform OS=Homo sapiens OX=9606 GN=PHKA2 PE=1 SV=1	1	1	1	1	138.3	1.24	1.043	1.231	1.336	1.24	1.148	1.221	1.141	1.431	259.3	321.5	270.5	319.2	346.3	321.4	297.7	316.5	295.9	371	0.486	0.465368	0.949	0.692	0.30495	0.995
P46020	PHKA1	Phosphorylase b kinase regulatory subunit alpha, skeletal muscle isoform OS=Homo sapiens OX=9606 GN=PHKA1 PE=1 SV=2	1	1	1	1	137.2	1.118	1.02	0.862	1.171	1.23	1.187	1.165	0.827	0.819	152.1	170	155.1	131.1	178	187	180.5	177.2	125.8	124.5	-0.633	0.556736	0.955	1.98	0.0864073	0.99
P46060	RANGAP1	Ran GTPase-activating protein 1 OS=Homo sapiens OX=9606 GN=RANGAP1 PE=1 SV=1	28	14	24	14	63.5	1.06	1.069	1.013	1.051	1.023	1.039	0.988	0.951	0.958	4024.3	4266.1	4300.8	4075	4228.7	4114.9	4181.9	3974.3	3827.8	3854.7	-1.03	0.0676945	0.773	0.0712	0.890689	0.998
P46063	RECQL	ATP-dependent DNA helicase Q1 OS=Homo sapiens OX=9606 GN=RECQL PE=1 SV=3	28	16	22	16	73.4	0.907	1.043	1.043	0.958	1.097	1.007	1.031	1.087	1.059	3154	2861.6	3289.2	3290.2	3020	3458.5	3177.5	3250.5	3427.3	3339.6	0.681	0.324776	0.933	0.386	0.570439	0.997
P46087	NOP2	Probable 28S rRNA (cytosine(4447)-C(5))-methyltransferase OS=Homo sapiens OX=9606 GN=NOP2 PE=1 SV=2	27	18	25	18	89.2	0.946	0.687	0.893	1.145	0.715	1.068	1.001	1.046	0.984	4114.5	3890.7	2827.3	3674.3	4710	2942.7	4395.8	4117.1	4304.2	4049.8	1.49	0.166876	0.888	1.52	0.158563	0.993
P46108	CRK	Adapter molecule crk OS=Homo sapiens OX=9606 GN=CRK PE=1 SV=2	28	7	8	7	33.8	1.014	0.986	0.964	1.012	1.06	0.987	0.98	0.925	0.975	1644.9	1668.2	1622.4	1585.2	1665.2	1743.6	1622.8	1612.2	1522.2	1604.6	-0.43	0.434228	0.946	0.486	0.378709	0.996
P46109	CRKL	Crk-like protein OS=Homo sapiens OX=9606 GN=CRKL PE=1 SV=1	42	9	15	9	33.8	1.015	0.993	0.944	0.997	1.008	1.007	1.02	0.98	0.994	3381.2	3430.3	3358	3191.3	3370.3	3407.8	3404.1	3449.8	3314	3361.4	0.0784	0.883276	0.969	0.337	0.53127	0.997
P46199	MTIF2	Translation initiation factor IF-2, mitochondrial OS=Homo sapiens OX=9606 GN=MTIF2 PE=1 SV=2	2	1	1	1	81.3	0.96	1.113	1.005	1.027	1.269	1.073	0.911	1.148	1.042	37.4	35.9	41.6	37.5	38.4	47.4	40.1	34	42.9	38.9	-0.018	0.982375	0.971	1.09	0.198645	0.994
P46379	BAG6	Large proline-rich protein BAG6 OS=Homo sapiens OX=9606 GN=BAG6 PE=1 SV=2	20	17	23	17	119.3	0.961	0.801	0.945	1.061	0.991	1.071	0.996	0.933	0.894	3359.3	3229.4	2691.7	3174.7	3564.4	3327.5	3597.2	3345.1	3134.1	3004.8	0.29	0.646787	0.96	1.64	0.0235615	0.974
P46459	NSF	Vesicle-fusing ATPase OS=Homo sapiens OX=9606 GN=NSF PE=1 SV=3	32	22	32	22	82.5	1.065	1.019	1.018	0.965	0.997	0.983	0.954	0.954	0.995	5198.1	5534.1	5294.9	5291.7	5016.3	5181	5111	4960.6	4958.1	5173.5	-0.927	0.0922153	0.821	-0.574	0.275994	0.995
P46527	CDKN1B	Cyclin-dependent kinase inhibitor 1B OS=Homo sapiens OX=9606 GN=CDKN1B PE=1 SV=1	9	1	1	1	22.1	0.745	1.175	1.027	1.105	0.974	0.969	0.908	1.072	0.847	78.5	58.5	92.3	80.7	86.8	76.5	76.1	71.3	84.2	66.5	-0.471	0.654589	0.961	0.475	0.651897	0.997
P46531	NOTCH1	Neurogenic locus notch homolog protein 1 OS=Homo sapiens OX=9606 GN=NOTCH1 PE=1 SV=4	0	1	1	1	272.3	0.922	1.092	1.001	0.995	0.977	0.867	0.946	1.074	1.029	138.5	127.7	151.1	138.6	137.8	135.3	120	131	148.7	142.4	0.0862	0.902668	0.969	-0.547	0.444662	0.996
P46734	MAP2K3	Dual specificity mitogen-activated protein kinase kinase 3 OS=Homo sapiens OX=9606 GN=MAP2K3 PE=1 SV=2	19	7	9	7	39.3	0.954	0.918	1.185	0.857	0.864	0.872	0.88	1.112	1.204	1716.2	1637.4	1576.1	2033.7	1471.1	1482.3	1496.8	1509.8	1907.7	2065.9	0.332	0.718419	0.963	-1.63	0.0977718	0.991
P46736	BRCC3	Lys-63-specific deubiquitinase BRCC36 OS=Homo sapiens OX=9606 GN=BRCC3 PE=1 SV=2	12	3	3	3	36	1.017	1.103	0.983	0.902	1.074	0.929	0.939	1.026	1.108	499.5	507.9	551.2	490.9	450.3	536.6	464.2	469	512.4	553.7	-0.26	0.730954	0.964	-0.712	0.354891	0.996
P46776	RPL27A	60S ribosomal protein L27a OS=Homo sapiens OX=9606 GN=RPL27A PE=1 SV=2	22	3	4	3	16.6	0.94	1.199	1.037	1.045	1.098	0.97	1.073	1.031	0.871	282.3	265.5	338.5	292.8	295	310	273.8	303.1	291.1	245.8	-0.48	0.574627	0.956	0.116	0.891089	0.998
P46777	RPL5	60S ribosomal protein L5 OS=Homo sapiens OX=9606 GN=RPL5 PE=1 SV=3	30	8	12	8	34.3	0.975	1.241	0.984	1.108	1.151	1.021	1.03	1.07	1.01	1667.3	1625.3	2069.2	1639.9	1848	1919.4	1702.3	1717	1784.7	1683.7	-0.0912	0.899831	0.969	0.714	0.335894	0.996
P46778	RPL21	60S ribosomal protein L21 OS=Homo sapiens OX=9606 GN=RPL21 PE=1 SV=2	29	5	7	5	18.6	0.978	1.38	0.985	1.184	1.213	1.064	1.089	1.057	1.098	1413.2	1381.6	1950.8	1392.2	1672.8	1714	1504.3	1539.6	1493.7	1551.8	0.166	0.836687	0.967	1.01	0.225906	0.994
P46779	RPL28	60S ribosomal protein L28 OS=Homo sapiens OX=9606 GN=RPL28 PE=1 SV=3	44	7	13	7	15.7	1.056	1.186	1.004	1.077	1.031	1.048	1.125	0.984	1.088	2451.8	2588.6	2907.3	2460.9	2639.5	2529	2568.9	2758	2413.8	2666.8	-0.177	0.794124	0.966	-0.00388	0.995431	0.998
P46781	RPS9	40S ribosomal protein S9 OS=Homo sapiens OX=9606 GN=RPS9 PE=1 SV=3	42	9	18	9	22.6	1.082	1.088	0.999	0.999	1.069	1.004	1.12	0.933	1.057	2174.8	2353.5	2365.2	2171.8	2173.3	2325.3	2182.7	2435.1	2028.1	2298.2	-0.321	0.657807	0.961	-0.227	0.753586	0.997
P46782	RPS5	40S ribosomal protein S5 OS=Homo sapiens OX=9606 GN=RPS5 PE=1 SV=4	22	5	9	5	22.9	0.95	0.911	0.957	1.014	0.956	0.994	0.959	0.979	0.918	2352.3	2234.1	2143.8	2251.9	2385.2	2247.8	2339.2	2256	2301.7	2158.5	0.0734	0.885342	0.969	0.665	0.209446	0.994
P46783	RPS10	40S ribosomal protein S10 OS=Homo sapiens OX=9606 GN=RPS10 PE=1 SV=1	49	8	20	7	18.9	1.09	0.991	0.961	1.153	1.031	1.082	1.073	1.093	0.945	3736.5	4071.6	3703.4	3592.1	4308	3853.2	4044.2	4010.5	4084.1	3531.1	0.228	0.752793	0.965	0.974	0.19582	0.994
P46821	MAP1B	Microtubule-associated protein 1B OS=Homo sapiens OX=9606 GN=MAP1B PE=1 SV=2	2	4	4	4	270.5	0.463	0.567	0.958	0.556	0.659	0.729	0.539	1.416	1.533	823.7	381.1	466.9	788.8	457.7	543.2	600.3	444	1166.7	1262.6	3.07	0.0630524	0.76	-0.545	0.718615	0.997
P46926	GNPDA1	Glucosamine-6-phosphate isomerase 1 OS=Homo sapiens OX=9606 GN=GNPDA1 PE=1 SV=1	11	3	4	3	32.6	1.054	1.128	1.07	0.88	1.045	0.989	0.786	0.927	1.157	362.6	382.3	409	388	319	379	358.6	285	336.3	419.4	-1.56	0.108519	0.843	-1.18	0.214054	0.994
P46937	YAP1	Transcriptional coactivator YAP1 OS=Homo sapiens OX=9606 GN=YAP1 PE=1 SV=2	14	3	4	3	54.4	0.936	1.172	1.109	1.223	0.904	0.915	1.262	1.055	1.264	30.6	28.6	35.8	33.9	37.4	27.6	28	38.6	32.3	38.6	0.992	0.348524	0.936	-0.562	0.589793	0.997
P46939	UTRN	Utrophin OS=Homo sapiens OX=9606 GN=UTRN PE=1 SV=2	1	3	3	3	394.2	0.854	0.979	1.245	1.12	1.136	0.976	1.374	1.01	1.524	230.2	196.7	225.4	286.6	257.9	261.5	224.6	316.4	232.6	350.9	1.84	0.118027	0.853	0.914	0.415731	0.996
P46940	IQGAP1	Ras GTPase-activating-like protein IQGAP1 OS=Homo sapiens OX=9606 GN=IQGAP1 PE=1 SV=1	24	33	44	31	189.1	0.925	0.968	1.016	1.023	1.017	1.004	1.018	0.99	0.977	7782.2	7198.6	7532.8	7909.1	7960.4	7916.9	7814	7921.6	7706.1	7603.9	0.262	0.625593	0.959	0.7	0.208465	0.994
P46976	GYG1	Glycogenin-1 OS=Homo sapiens OX=9606 GN=GYG1 PE=1 SV=4	12	4	8	4	39.4	1.423	0.94	1.258	0.92	0.855	0.962	0.933	0.755	0.755	1820.2	2589.8	1710.4	2289.8	1674	1556.9	1750.2	1698	1374.3	1374.4	-3.22	0.00500306	0.207	-2.48	0.0200724	0.97
P46977	STT3A	Dolichyl-diphosphooligosaccharide--protein glycosyltransferase subunit STT3A OS=Homo sapiens OX=9606 GN=STT3A PE=1 SV=2	8	6	6	5	80.5	0.762	0.655	0.715	0.958	0.789	1.219	0.892	1.207	1.09	241.3	183.8	158	172.6	231.3	190.3	294.2	215.3	291.3	263.2	2.81	0.0257815	0.548	2.25	0.0625933	0.987
P47712	PLA2G4A	Cytosolic phospholipase A2 OS=Homo sapiens OX=9606 GN=PLA2G4A PE=1 SV=2	11	7	8	7	85.2	1.645	1.157	0.588	1.654	1.747	1.444	0.904	0.367	0.496	595.8	980	689.4	350.4	985.3	1040.7	860.5	538.7	218.4	295.6	-3.31	0.0359009	0.637	2.81	0.0666331	0.988
P47736	RAP1GAP	Rap1 GTPase-activating protein 1 OS=Homo sapiens OX=9606 GN=RAP1GAP PE=1 SV=2	4	2	2	2	73.3	1.26	0.923	1.128	1.021	1.01	0.991	0.929	0.876	1.115	258.4	325.6	238.4	291.5	263.8	261.1	256.1	240.1	226.4	287.9	-1.41	0.134727	0.867	-0.716	0.429697	0.996
P47755	CAPZA2	F-actin-capping protein subunit alpha-2 OS=Homo sapiens OX=9606 GN=CAPZA2 PE=1 SV=3	33	6	14	5	32.9	0.91	1.084	1.012	0.885	0.97	0.897	0.899	1.052	1.148	988.2	899.6	1071	1000.2	874.6	958.7	886.1	888.5	1039.4	1134	0.195	0.804322	0.966	-0.927	0.254171	0.995
P47756	CAPZB	F-actin-capping protein subunit beta OS=Homo sapiens OX=9606 GN=CAPZB PE=1 SV=4	27	7	14	7	31.3	0.983	1.022	0.95	1.003	1.013	1.023	1.032	0.99	1.005	1666.1	1637.1	1702.2	1582.7	1670.8	1687.7	1705	1719.4	1649.8	1675.2	0.23	0.667639	0.961	0.479	0.378926	0.996
P47813	EIF1AX	Eukaryotic translation initiation factor 1A, X-chromosomal OS=Homo sapiens OX=9606 GN=EIF1AX PE=1 SV=2	52	6	11	6	16.5	1.171	1.033	1.007	1.031	0.957	0.945	1.031	1.011	1.016	3017	3531.4	3117.6	3037.7	3110.1	2888.6	2849.8	3109.8	3051.5	3066.7	-0.577	0.377461	0.94	-0.926	0.168519	0.993
P47897	QARS1	Glutamine--tRNA ligase OS=Homo sapiens OX=9606 GN=QARS1 PE=1 SV=1	31	21	27	21	87.7	0.921	1.059	0.963	0.989	0.973	1.003	0.991	1.027	1.037	3701	3407.1	3918.6	3564.2	3660.7	3601.4	3711.4	3667.4	3801.2	3837.5	0.398	0.492108	0.951	0.232	0.68642	0.997
P47914	RPL29	60S ribosomal protein L29 OS=Homo sapiens OX=9606 GN=RPL29 PE=1 SV=2	14	2	3	2	17.7	0.91	1.118	0.948	1.111	0.939	1.059	1.053	0.97	1.097	1276.1	1161.9	1427	1209.4	1417.8	1197.9	1351.7	1344	1237.4	1399.6	0.557	0.504686	0.952	0.758	0.368449	0.996
P47985	UQCRFS1	Cytochrome b-c1 complex subunit Rieske, mitochondrial OS=Homo sapiens OX=9606 GN=UQCRFS1 PE=1 SV=2	31	6	8	6	29.6	0.995	1.21	1.062	0.983	1.032	1.003	0.874	0.946	1.018	1423.3	1416.8	1721.9	1511.4	1398.7	1469	1428	1244	1346.3	1448.2	-1.58	0.0328744	0.615	-0.624	0.351061	0.996
P48047	ATP5PO	ATP synthase subunit O, mitochondrial OS=Homo sapiens OX=9606 GN=ATP5PO PE=1 SV=1	45	8	24	8	23.3	0.999	1.147	1.076	1.069	0.975	1.017	0.949	1.135	1.082	2289.5	2288	2626	2463.1	2447.4	2232.2	2329.1	2172.2	2598.4	2477.2	-0.292	0.669221	0.961	-0.349	0.60984	0.997
P48059	LIMS1	LIM and senescent cell antigen-like-containing domain protein 1 OS=Homo sapiens OX=9606 GN=LIMS1 PE=1 SV=4	9	3	3	3	37.2	0.92	0.991	1.164	0.875	0.922	0.823	1.053	1.142	0.959	1391.2	1280.3	1378.9	1619.8	1218	1282.2	1145.5	1465.1	1589.1	1334.1	0.372	0.639147	0.96	-1.59	0.0645949	0.988
P48147	PREP	Prolyl endopeptidase OS=Homo sapiens OX=9606 GN=PREP PE=1 SV=2	20	13	16	13	80.6	1.048	0.978	1.082	0.964	1.056	0.989	0.921	0.933	0.985	3742.8	3923.9	3659	4048.3	3609	3953	3702.7	3447.3	3493.6	3686.9	-1.2	0.060634	0.753	-0.321	0.585064	0.997
P48163	ME1	NADP-dependent malic enzyme OS=Homo sapiens OX=9606 GN=ME1 PE=1 SV=1	4	3	3	3	64.1	1.062	0.879	1.004	1.017	0.942	1.021	1.031	1.023	1.105	345.3	366.9	303.6	346.8	351.2	325.1	352.8	355.9	353.1	381.6	0.63	0.351605	0.937	0.163	0.805624	0.997
P48200	IREB2	Iron-responsive element-binding protein 2 OS=Homo sapiens OX=9606 GN=IREB2 PE=1 SV=4	5	5	7	5	105	0.938	0.777	0.885	0.938	0.908	0.945	0.975	1.316	1.027	626.7	587.9	487.1	554.8	587.7	569.2	592.1	610.7	824.5	643.5	2.09	0.0165332	0.416	0.505	0.503257	0.997
P48436	SOX9	Transcription factor SOX-9 OS=Homo sapiens OX=9606 GN=SOX9 PE=1 SV=1	2	1	1	1	56.1	1.128	0.86	1.066	1.253	1.133	1.13	1.326	0.912	0.777	71.5	80.6	61.5	76.1	89.5	81	80.8	94.8	65.2	55.5	-0.418	0.726834	0.964	1.58	0.204545	0.994
P48444	ARCN1	Coatomer subunit delta OS=Homo sapiens OX=9606 GN=ARCN1 PE=1 SV=1	27	13	23	13	57.2	1.033	1.162	1.084	0.961	1.022	0.918	0.954	0.977	1	3021.1	3119.7	3511.9	3273.8	2902.7	3087.3	2772.2	2882.2	2951.8	3020	-1.35	0.0344752	0.627	-1.31	0.0392668	0.982
P48449	LSS	Lanosterol synthase OS=Homo sapiens OX=9606 GN=LSS PE=1 SV=1	22	14	18	14	83.3	0.966	0.889	1.117	0.976	1.054	0.971	0.976	1.082	1.072	2405.1	2323.9	2137.1	2687.7	2347.6	2535	2335.7	2346.7	2601.8	2579	0.497	0.486253	0.951	0.204	0.7723	0.997
P48454	PPP3CC	Serine/threonine-protein phosphatase 2B catalytic subunit gamma isoform OS=Homo sapiens OX=9606 GN=PPP3CC PE=1 SV=3	9	4	8	1	58.1	0.923	0.77	0.887	0.679	1.01	0.782	0.83	1.283	1.529	173.3	160	133.5	153.8	117.7	175	135.6	143.9	222.5	265.1	2.48	0.0653936	0.767	-0.174	0.887751	0.998
P48506	GCLC	Glutamate--cysteine ligase catalytic subunit OS=Homo sapiens OX=9606 GN=GCLC PE=1 SV=2	12	6	6	6	72.7	0.831	1.304	1.362	0.843	0.843	0.841	0.975	1.017	1.175	617.6	513.4	805.2	841.2	520.6	520.4	519.1	601.9	628.1	725.4	-0.592	0.584343	0.957	-2.73	0.0260149	0.976
P48507	GCLM	Glutamate--cysteine ligase regulatory subunit OS=Homo sapiens OX=9606 GN=GCLM PE=1 SV=1	23	5	7	5	30.7	1.124	1.149	1.069	0.938	0.891	0.921	1.086	1.043	0.98	886.7	996.3	1019.1	948	831.6	790.3	816.4	962.7	925.2	869	-0.809	0.184295	0.896	-2.19	0.00314246	0.843
P48556	PSMD8	26S proteasome non-ATPase regulatory subunit 8 OS=Homo sapiens OX=9606 GN=PSMD8 PE=1 SV=2	15	7	11	7	39.6	1.028	0.981	1.027	0.927	0.942	0.945	0.965	0.98	0.984	1531.9	1574.2	1503.1	1572.7	1420.6	1443.3	1447.1	1478.6	1501.2	1508.1	-0.555	0.271274	0.923	-0.91	0.0853575	0.99
P48634	PRRC2A	Protein PRRC2A OS=Homo sapiens OX=9606 GN=PRRC2A PE=1 SV=3	9	13	16	13	228.7	0.984	0.845	0.896	1.051	0.765	1.043	1.104	0.993	1.086	1914.4	1883.1	1617.5	1715.9	2012.5	1464.8	1997.3	2113.7	1901.8	2078.7	1.54	0.105021	0.838	0.717	0.426644	0.996
P48637	GSS	Glutathione synthetase OS=Homo sapiens OX=9606 GN=GSS PE=1 SV=1	40	17	34	17	52.4	1.062	1.297	1.083	0.996	1.071	0.972	0.987	0.895	0.914	6065.8	6443.5	7867.4	6570.2	6039.3	6498.8	5894.1	5986.4	5428.3	5545.5	-2.12	0.00730241	0.281	-1.06	0.125473	0.992
P48643	CCT5	T-complex protein 1 subunit epsilon OS=Homo sapiens OX=9606 GN=CCT5 PE=1 SV=1	34	19	51	19	59.6	1.102	1.021	0.956	0.965	1.023	0.989	1.004	0.944	0.934	10330.8	11382.1	10543.6	9874.2	9970.9	10564.7	10213.2	10375.6	9748.1	9652.5	-0.818	0.222035	0.91	-0.322	0.619745	0.997
P48681	NES	Nestin OS=Homo sapiens OX=9606 GN=NES PE=1 SV=2	4	5	5	5	177.3	0.646	0.379	1.047	0.669	0.387	0.72	0.827	1.605	1.124	245.5	158.6	93	257.2	164.2	95.1	176.7	203	394.2	275.9	2.72	0.0640784	0.763	-1.08	0.427959	0.996
P48723	HSPA13	Heat shock 70 kDa protein 13 OS=Homo sapiens OX=9606 GN=HSPA13 PE=1 SV=1	5	2	2	2	51.9	1.002	1.091	0.973	1.002	0.986	1.027	0.999	1.03	1.054	87.4	87.6	95.4	85	87.6	86.2	89.8	87.3	90.1	92.1	0.0137	0.980115	0.971	-0.0305	0.955759	0.998
P48729	CSNK1A1	Casein kinase I isoform alpha OS=Homo sapiens OX=9606 GN=CSNK1A1 PE=1 SV=2	24	7	9	7	38.9	1.003	1.037	0.975	1.098	1.08	1.114	1.035	0.948	0.923	972	974.6	1008.2	948	1067.6	1049.8	1083.2	1006	921.8	897.3	-0.435	0.468774	0.949	1.23	0.0596586	0.987
P48730	CSNK1D	Casein kinase I isoform delta OS=Homo sapiens OX=9606 GN=CSNK1D PE=1 SV=2	14	5	5	1	47.3	0.809	1.29	0.898	1.035	0.978	1.216	0.889	0.922	1.108	100.5	81.3	129.6	90.3	104	98.2	122.2	89.3	92.6	111.3	-0.182	0.873681	0.969	1.18	0.31493	0.995
P48735	IDH2	Isocitrate dehydrogenase [NADP], mitochondrial OS=Homo sapiens OX=9606 GN=IDH2 PE=1 SV=2	24	10	14	9	50.9	0.861	1.6	1.318	0.804	1.325	0.797	0.992	1.169	1.124	1794.2	1545.7	2870.8	2364.5	1442.6	2377.7	1429.9	1779.3	2098.1	2016.2	-0.451	0.762482	0.965	-1.83	0.234925	0.995
P48739	PITPNB	Phosphatidylinositol transfer protein beta isoform OS=Homo sapiens OX=9606 GN=PITPNB PE=1 SV=2	27	7	10	7	31.5	1.019	1.119	1.009	1.085	1.173	1.033	1.018	0.942	0.934	1586.7	1616.7	1776.2	1601.1	1720.7	1860.7	1639.5	1616	1495.3	1481.4	-0.959	0.145894	0.875	0.696	0.279479	0.995
P48960	ADGRE5	Adhesion G protein-coupled receptor E5 OS=Homo sapiens OX=9606 GN=ADGRE5 PE=1 SV=4	2	1	1	1	91.8	0.894	0.892	0.913	1.149	0.796	0.755	1.087	0.847	1.517	52.1	46.6	46.5	47.6	59.9	41.5	39.4	56.7	44.2	79.1	1.9	0.161429	0.885	0.275	0.831532	0.998
P49005	POLD2	DNA polymerase delta subunit 2 OS=Homo sapiens OX=9606 GN=POLD2 PE=1 SV=1	9	3	5	3	51.3	1.045	0.949	0.987	1.01	1.007	1.066	1.037	1.048	1.081	249.5	260.8	236.9	246.2	252	251.2	266	258.7	261.5	269.8	0.598	0.293046	0.927	0.507	0.368409	0.996
P49006	MARCKSL1	MARCKS-related protein OS=Homo sapiens OX=9606 GN=MARCKSL1 PE=1 SV=2	55	5	5	5	19.5	1.021	0.778	1.273	0.921	0.82	0.937	0.754	0.878	1.364	301.5	307.9	234.6	383.8	277.5	247.1	282.6	227.3	264.7	411.2	-0.707	0.591528	0.957	-1.4	0.299119	0.995
P49023	PXN	Paxillin OS=Homo sapiens OX=9606 GN=PXN PE=1 SV=3	11	5	6	5	64.5	0.982	1.056	1.018	0.916	0.915	0.898	1.04	1.032	1.125	803.6	789.4	848.6	818.4	736	735.3	721.6	835.9	829.4	904.3	0.446	0.39574	0.942	-1.28	0.0289155	0.978
P49069	CAMLG	Calcium signal-modulating cyclophilin ligand OS=Homo sapiens OX=9606 GN=CAMLG PE=1 SV=1	7	1	1	1	32.9	1.06	1.035	1.272	0.926	0.906	0.937	0.919	1.204	1.065	153.8	163	159.1	195.7	142.4	139.3	144.2	141.3	185.2	163.8	-0.699	0.380244	0.94	-2.06	0.0222405	0.972
P49137	MAPKAPK2	MAP kinase-activated protein kinase 2 OS=Homo sapiens OX=9606 GN=MAPKAPK2 PE=1 SV=1	12	5	6	2	45.5	0.864	1.3	1.269	1.292	1.09	0.915	0.94	1.137	0.999	35.2	30.4	45.8	44.7	45.5	38.4	32.2	33.1	40	35.2	-0.806	0.509895	0.952	-0.00985	0.993504	0.998
P49189	ALDH9A1	4-trimethylaminobutyraldehyde dehydrogenase OS=Homo sapiens OX=9606 GN=ALDH9A1 PE=1 SV=3	29	13	22	13	53.8	1.099	1.112	1.057	0.992	1.157	1.027	0.866	0.891	0.88	3543.1	3894.7	3939.3	3744.8	3514.2	4099.6	3639.2	3069.5	3158.4	3118.5	-2.4	0.00193904	0.0858	-0.25	0.674924	0.997
P49207	RPL34	60S ribosomal protein L34 OS=Homo sapiens OX=9606 GN=RPL34 PE=1 SV=3	34	5	10	5	13.3	1.005	1.15	0.941	1.128	1.031	1.059	1.173	0.975	1.167	1155.9	1161.6	1329.3	1087.7	1303.6	1191.7	1223.8	1356	1127.4	1349.5	0.659	0.419427	0.945	0.746	0.362423	0.996
P49247	RPIA	Ribose-5-phosphate isomerase OS=Homo sapiens OX=9606 GN=RPIA PE=1 SV=3	7	2	3	2	33.2	1.209	1.037	1.266	1.012	0.972	0.909	0.698	0.798	0.668	862.1	1042.2	894.3	1091.7	872.8	837.6	783.2	602	687.9	575.8	-3.94	8.85422e-05	0.000183	-1.9	0.0125517	0.956
P49257	LMAN1	Protein ERGIC-53 OS=Homo sapiens OX=9606 GN=LMAN1 PE=1 SV=2	15	6	6	6	57.5	0.975	0.976	0.996	1.008	1.022	1.055	1.044	1.084	1.029	1490.5	1453.2	1454.5	1484.4	1502.2	1523.6	1573	1556.4	1615.6	1534.1	0.769	0.153249	0.88	0.701	0.188998	0.994
P49321	NASP	Nuclear autoantigenic sperm protein OS=Homo sapiens OX=9606 GN=NASP PE=1 SV=2	39	21	62	21	85.2	0.999	0.733	1.039	0.975	0.776	0.946	0.964	0.966	0.954	9225.7	9220.5	6762.5	9582.5	8997.5	7156.2	8726.1	8897.1	8912.1	8805.5	0.0251	0.974576	0.971	-0.436	0.583022	0.997
P49327	FASN	Fatty acid synthase OS=Homo sapiens OX=9606 GN=FASN PE=1 SV=3	36	73	165	73	273.3	0.941	0.78	0.874	1.167	1.204	1.28	0.953	0.851	0.824	29295.9	27560.4	22841.2	25594.7	34181.6	35272.2	37512.2	27924.9	24935.3	24145.3	0.0324	0.955958	0.971	3.49	0.000110672	0.0343
P49354	FNTA	Protein farnesyltransferase/geranylgeranyltransferase type-1 subunit alpha OS=Homo sapiens OX=9606 GN=FNTA PE=1 SV=1	9	3	4	3	44.4	0.937	0.91	1.059	0.978	0.802	0.953	1.003	1.053	1.2	605.5	567.6	551.1	641.1	592.3	485.3	577.1	607.5	637.8	726.5	1.1	0.145653	0.875	-0.541	0.45592	0.996
P49366	DHPS	Deoxyhypusine synthase OS=Homo sapiens OX=9606 GN=DHPS PE=1 SV=1	16	5	5	5	40.9	1.037	0.935	0.863	1.075	1.096	1.278	1.073	0.917	0.801	1085.8	1125.9	1014.9	936.8	1167.5	1190.2	1388.1	1165.5	995.8	869.3	-0.0968	0.912157	0.97	2.13	0.0319443	0.979
P49368	CCT3	T-complex protein 1 subunit gamma OS=Homo sapiens OX=9606 GN=CCT3 PE=1 SV=4	43	19	47	19	60.5	1.022	0.972	0.969	1.01	1.042	1.037	1.009	1.019	0.912	7120	7273.3	6923.4	6898.9	7190.2	7417.1	7380.3	7186.6	7255.1	6493.1	-0.121	0.8313	0.967	0.629	0.282443	0.995
P49406	MRPL19	39S ribosomal protein L19, mitochondrial OS=Homo sapiens OX=9606 GN=MRPL19 PE=1 SV=2	27	7	8	7	33.5	0.985	1.058	1.082	0.966	1.005	0.949	0.959	0.926	1.022	1443.1	1420.9	1526.3	1561.2	1393.6	1450.8	1369.2	1384	1336.7	1475	-0.934	0.120107	0.855	-0.717	0.221808	0.994
P49407	ARRB1	Beta-arrestin-1 OS=Homo sapiens OX=9606 GN=ARRB1 PE=1 SV=2	16	5	7	5	47	1.131	1.069	0.76	1.413	1.207	1.297	1.244	0.672	0.706	477.9	540.6	510.7	363.3	675	577	619.7	594.4	321.1	337.2	-0.919	0.505727	0.952	2.53	0.0865129	0.99
P49411	TUFM	Elongation factor Tu, mitochondrial OS=Homo sapiens OX=9606 GN=TUFM PE=1 SV=2	52	20	40	20	49.5	1.022	1.12	1.044	0.952	0.97	0.929	0.979	0.972	1.039	7984.9	8164	8941.5	8338.9	7603.7	7741.9	7421	7815.9	7761.9	8295.4	-0.825	0.138076	0.87	-1.25	0.0351835	0.981
P49419	ALDH7A1	Alpha-aminoadipic semialdehyde dehydrogenase OS=Homo sapiens OX=9606 GN=ALDH7A1 PE=1 SV=5	23	9	9	9	58.5	0.596	0.727	1.658	0.772	0.965	0.629	0.617	1.167	1.404	938.2	559.3	682	1555.5	724.6	905.7	590	578.4	1095.3	1316.8	0.957	0.602593	0.958	-1.26	0.49556	0.997
P49427	CDC34	Ubiquitin-conjugating enzyme E2 R1 OS=Homo sapiens OX=9606 GN=CDC34 PE=1 SV=2	12	3	4	3	26.7	0.917	0.996	1.251	0.892	0.862	0.796	0.867	1.18	1.281	507.4	465.5	505.3	634.9	452.4	437.3	403.9	440	598.7	650	0.358	0.733687	0.964	-1.99	0.0803204	0.989
P49458	SRP9	Signal recognition particle 9 kDa protein OS=Homo sapiens OX=9606 GN=SRP9 PE=1 SV=2	58	6	13	6	10.1	1.034	0.952	1.032	0.974	1.051	0.952	0.973	0.92	0.965	3772.3	3902.5	3591.3	3894.3	3674.5	3966.3	3592	3670.6	3468.7	3638.7	-0.746	0.222124	0.91	-0.133	0.821474	0.997
P49459	UBE2A	Ubiquitin-conjugating enzyme E2 A OS=Homo sapiens OX=9606 GN=UBE2A PE=1 SV=2	18	2	2	2	17.3	0.967	1.145	1.27	1.08	0.945	0.869	1.005	1.131	1.08	298.9	288.9	342.2	379.5	322.8	282.5	259.8	300.3	338.1	322.9	-0.346	0.687023	0.962	-1.37	0.131227	0.992
P49588	AARS1	Alanine--tRNA ligase, cytoplasmic OS=Homo sapiens OX=9606 GN=AARS1 PE=1 SV=2	36	28	55	28	106.7	0.994	1.023	0.91	1.042	1.075	1.04	1.089	1.041	0.843	8169.6	8121.8	8355.3	7432.3	8509.6	8782.7	8493.3	8897.3	8503.9	6887.4	0.27	0.723108	0.964	1.06	0.181145	0.994
P49589	CARS1	Cysteine--tRNA ligase, cytoplasmic OS=Homo sapiens OX=9606 GN=CARS1 PE=1 SV=3	20	13	20	13	85.4	1.066	0.945	0.939	1.083	0.998	1.108	1.064	1.012	0.856	2280	2430.5	2155.4	2140.8	2469.7	2274.3	2526.4	2424.8	2307.3	1951.9	-0.0309	0.968611	0.971	1.03	0.206138	0.994
P49590	HARS2	Histidine--tRNA ligase, mitochondrial OS=Homo sapiens OX=9606 GN=HARS2 PE=1 SV=1	14	7	11	3	56.9	0.978	1.152	1.043	1.03	1.106	0.994	1.092	1.054	1.239	1054.8	1031.1	1214.7	1100.5	1086.5	1166.4	1048.3	1152.3	1112.2	1307.3	0.635	0.342132	0.935	0.096	0.883185	0.998
P49591	SARS1	Serine--tRNA ligase, cytoplasmic OS=Homo sapiens OX=9606 GN=SARS1 PE=1 SV=3	18	9	14	9	58.7	1.331	1.144	0.98	0.919	0.917	0.939	1.005	1.017	0.937	1831.4	2437.2	2095.5	1795.3	1682.9	1678.7	1719.2	1840.1	1862.6	1715.6	-1.44	0.0804739	0.801	-2.14	0.0157545	0.963
P49593	PPM1F	Protein phosphatase 1F OS=Homo sapiens OX=9606 GN=PPM1F PE=1 SV=3	5	1	1	1	49.8	0.605	0.798	1.505	0.7	0.779	0.786	0.664	1.204	1.321	95.2	57.6	75.9	143.2	66.6	74.2	74.8	63.2	114.6	125.7	0.981	0.553779	0.955	-1.73	0.306558	0.995
P49642	PRIM1	DNA primase small subunit OS=Homo sapiens OX=9606 GN=PRIM1 PE=1 SV=1	6	3	3	3	49.9	1.112	0.938	0.861	1.032	1.046	1.033	1.093	0.934	0.877	650.3	723.4	610	559.8	671.3	680.5	672	711	607.4	570.6	-0.0767	0.93139	0.97	0.874	0.337782	0.996
P49643	PRIM2	DNA primase large subunit OS=Homo sapiens OX=9606 GN=PRIM2 PE=1 SV=2	15	7	9	7	58.8	1.114	0.876	0.916	1.11	1.084	1.093	1.072	0.956	0.849	1410.4	1570.6	1234.9	1292	1565	1529	1541.5	1512.3	1348.2	1197.7	-0.109	0.899679	0.969	1.56	0.0953562	0.99
P49674	CSNK1E	Casein kinase I isoform epsilon OS=Homo sapiens OX=9606 GN=CSNK1E PE=1 SV=1	18	6	6	2	47.3	1.233	1.29	0.96	1.152	1.097	1.113	1.471	1.066	1.097	59.3	73.1	76.5	56.9	68.3	65	66	87.2	63.2	65.1	0.257	0.783299	0.966	0.208	0.823766	0.997
P49711	CTCF	Transcriptional repressor CTCF OS=Homo sapiens OX=9606 GN=CTCF PE=1 SV=1	6	4	5	4	82.7	1.089	0.898	0.958	1.172	0.999	1.115	1.233	1.043	0.887	1074.1	1169.2	964	1029.4	1259.2	1073.4	1197.2	1324.8	1120.7	952.9	0.617	0.533252	0.954	1.32	0.197377	0.994
P49720	PSMB3	Proteasome subunit beta type-3 OS=Homo sapiens OX=9606 GN=PSMB3 PE=1 SV=2	22	4	9	4	22.9	0.964	1.045	1.022	0.964	1.034	0.988	0.991	1.038	0.928	1507.6	1453.7	1575.6	1541.3	1453.4	1558.4	1490	1493.8	1565.2	1399.2	-0.291	0.620644	0.959	-0.061	0.916932	0.998
P49721	PSMB2	Proteasome subunit beta type-2 OS=Homo sapiens OX=9606 GN=PSMB2 PE=1 SV=1	12	2	3	2	22.8	1.102	1.111	1.069	1.091	1.197	1.108	1.172	1.146	1.663	146.9	161.8	163.1	157.1	160.2	175.9	162.7	172.2	168.3	244.2	1.13	0.0849284	0.809	0.513	0.406657	0.996
P49736	MCM2	DNA replication licensing factor MCM2 OS=Homo sapiens OX=9606 GN=MCM2 PE=1 SV=4	37	26	52	26	101.8	1.062	0.942	0.848	1.063	1.09	1.072	1.062	0.959	0.894	10616	11279	10001.1	9007.4	11283	11570.3	11376.4	11277.7	10184.2	9485.7	0.139	0.857748	0.968	1.5	0.0752092	0.989
P49748	ACADVL	Very long-chain specific acyl-CoA dehydrogenase, mitochondrial OS=Homo sapiens OX=9606 GN=ACADVL PE=1 SV=1	38	21	44	21	70.3	0.883	1.297	1.172	0.913	1.035	0.943	0.922	0.976	1.038	8243.4	7279.2	10695.2	9664.6	7527	8532.4	7775.7	7597.7	8044.2	8553.6	-1.21	0.214351	0.907	-1.21	0.216346	0.994
P49750	YLPM1	YLP motif-containing protein 1 OS=Homo sapiens OX=9606 GN=YLPM1 PE=1 SV=4	12	19	22	18	241.5	1.048	0.944	0.974	1.055	0.94	1.034	1.102	0.979	1.083	2853.6	2989.5	2692.5	2779.8	3009.5	2682.8	2949.4	3144.8	2792.4	3089.6	0.614	0.390467	0.942	0.35	0.620277	0.997
P49754	VPS41	Vacuolar protein sorting-associated protein 41 homolog OS=Homo sapiens OX=9606 GN=VPS41 PE=1 SV=3	1	1	2	1	98.5	0.892	1.049	1.205	0.904	0.936	0.883	0.841	1.022	1.14	315.5	281.5	330.9	380.1	285.1	295.4	278.6	265.5	322.4	359.7	-0.533	0.570399	0.956	-1.46	0.139556	0.993
P49755	TMED10	Transmembrane emp24 domain-containing protein 10 OS=Homo sapiens OX=9606 GN=TMED10 PE=1 SV=2	32	6	12	6	25	1.035	1.113	1.05	1.033	1.098	0.965	0.902	1.006	0.989	2857.9	2956.5	3180.9	3000	2952.4	3137.3	2758.6	2578.3	2874.1	2825.1	-1.26	0.0579659	0.744	-0.238	0.693404	0.997
P49757	NUMB	Protein numb homolog OS=Homo sapiens OX=9606 GN=NUMB PE=1 SV=2	5	3	3	3	70.8	0.955	0.99	1.091	0.915	0.967	0.942	1.001	1.093	1.146	551.1	526.3	545.8	601.2	504.3	532.9	519.2	551.7	602.6	631.4	0.648	0.294474	0.928	-0.794	0.204964	0.994
P49770	EIF2B2	Translation initiation factor eIF-2B subunit beta OS=Homo sapiens OX=9606 GN=EIF2B2 PE=1 SV=3	13	4	4	4	39	0.97	1.059	1.119	1.033	1.12	0.999	1.038	1.135	1.215	358.2	347.3	379.2	400.8	369.8	401	357.7	371.8	406.7	435.3	0.702	0.278575	0.924	0.218	0.729885	0.997
P49773	HINT1	Histidine triad nucleotide-binding protein 1 OS=Homo sapiens OX=9606 GN=HINT1 PE=1 SV=2	24	3	8	3	13.8	1.084	1.164	0.938	1.079	1.207	1.078	1.093	0.853	0.767	2168	2350.3	2524.5	2034.6	2338.6	2617.8	2336.7	2369.8	1848.9	1663	-1.42	0.160742	0.884	0.825	0.398361	0.996
P49789	FHIT	Bis(5'-adenosyl)-triphosphatase OS=Homo sapiens OX=9606 GN=FHIT PE=1 SV=3	21	2	3	2	16.8	0.951	1.065	1.184	0.891	0.908	0.893	1.117	0.979	1.151	116.3	110.6	123.9	137.7	103.6	105.6	103.9	130	113.9	134	0.165	0.825032	0.967	-1.81	0.0316736	0.979
P49790	NUP153	Nuclear pore complex protein Nup153 OS=Homo sapiens OX=9606 GN=NUP153 PE=1 SV=2	25	28	33	28	153.8	1.081	0.93	1.004	1.022	0.967	0.979	0.981	1.014	1.045	3592.1	3884.1	3339.8	3608.1	3672	3474.6	3516	3524.1	3644	3755.5	-0.0588	0.921503	0.97	-0.127	0.831442	0.998
P49792	RANBP2	E3 SUMO-protein ligase RanBP2 OS=Homo sapiens OX=9606 GN=RANBP2 PE=1 SV=2	24	60	77	60	358	1.028	1.028	0.96	1.041	1	1.043	1.037	0.925	0.923	9989.6	10271.9	10271.9	9591.8	10402.4	9988	10419.4	10363.1	9245.2	9218.2	-0.532	0.409635	0.944	0.422	0.50984	0.997
P49796	RGS3	Regulator of G-protein signaling 3 OS=Homo sapiens OX=9606 GN=RGS3 PE=1 SV=2	2	2	3	2	132.3	1.236	1.551	1.067	0.846	0.864	1.231	0.948	1.106	0.626	37.8	46.7	58.6	40.3	32	32.7	46.5	35.8	41.8	23.6	-2.72	0.0519679	0.722	-2.33	0.0876419	0.99
P49815	TSC2	Tuberin OS=Homo sapiens OX=9606 GN=TSC2 PE=1 SV=2	1	2	2	2	200.5	0.929	0.93	1.003	1.149	0.877	0.917	1.14	0.905	1.02	27.1	25.1	25.2	27.1	31.1	23.7	24.8	30.8	24.5	27.6	0.7	0.476899	0.95	0.36	0.711651	0.997
P49821	NDUFV1	NADH dehydrogenase [ubiquinone] flavoprotein 1, mitochondrial OS=Homo sapiens OX=9606 GN=NDUFV1 PE=1 SV=4	19	8	10	8	50.8	1.047	1.109	1.134	0.999	0.889	0.909	0.865	0.898	1.022	2048.2	2144.7	2270.9	2323	2046.2	1820.9	1861.9	1771.3	1839.1	2093	-1.97	0.00950919	0.33	-1.78	0.0162192	0.964
P49840	GSK3A	Glycogen synthase kinase-3 alpha OS=Homo sapiens OX=9606 GN=GSK3A PE=1 SV=2	25	7	7	4	50.9	0.939	1.073	1.134	0.975	0.963	0.929	0.958	1.042	0.988	494.5	464.4	530.5	560.7	482.2	476.1	459.5	473.6	515.4	488.5	-0.592	0.36756	0.939	-0.946	0.162547	0.993
P49841	GSK3B	Glycogen synthase kinase-3 beta OS=Homo sapiens OX=9606 GN=GSK3B PE=1 SV=2	21	6	7	3	46.7	0.849	0.883	0.959	0.958	0.893	0.855	0.96	1.492	0.881	327.4	278.1	289.1	313.9	313.6	292.5	280	314.1	488.6	288.4	1.56	0.143778	0.874	0.0114	0.991039	0.998
P49848	TAF6	Transcription initiation factor TFIID subunit 6 OS=Homo sapiens OX=9606 GN=TAF6 PE=1 SV=1	4	2	2	2	72.6	0.9	0.851	0.873	0.933	0.855	0.94	1.177	0.899	1.08	162.9	146.5	138.7	142.1	152	139.2	153.2	191.7	146.5	175.9	1.77	0.0444052	0.688	0.306	0.70009	0.997
P49902	NT5C2	Cytosolic purine 5'-nucleotidase OS=Homo sapiens OX=9606 GN=NT5C2 PE=1 SV=1	4	2	2	2	64.9	0.898	0.962	0.896	1.227	1.443	1.278	1.131	0.932	1.005	406.7	365.1	391.3	364.4	499	587	519.9	460.1	379.1	408.9	1.11	0.14473	0.874	3.54	0.000472495	0.297
P49903	SEPHS1	Selenide, water dikinase 1 OS=Homo sapiens OX=9606 GN=SEPHS1 PE=1 SV=2	12	3	7	3	42.9	1.02	1.011	1.089	0.95	1.044	1.03	0.902	0.983	0.951	692	706	699.3	753.8	657.3	722.3	712.4	623.9	680.5	658.1	-1.22	0.0579377	0.744	-0.272	0.643411	0.997
P49914	MTHFS	5-formyltetrahydrofolate cyclo-ligase OS=Homo sapiens OX=9606 GN=MTHFS PE=1 SV=2	15	3	3	3	23.2	0.954	0.981	1.042	0.899	0.967	0.917	0.834	1.017	1.159	1090.4	1040	1069.6	1135.9	980.4	1054.4	1000.3	909.8	1109	1263.3	-0.0628	0.936607	0.97	-0.753	0.351023	0.996
P49915	GMPS	GMP synthase [glutamine-hydrolyzing] OS=Homo sapiens OX=9606 GN=GMPS PE=1 SV=1	21	14	18	14	76.7	1.1	1.093	0.921	1.023	1.031	1.031	1.02	0.939	0.941	3792.7	4173.4	4144.3	3493.9	3881.3	3908.4	3910.4	3867.8	3561	3570	-0.844	0.246764	0.917	0.0827	0.906483	0.998
P49916	LIG3	DNA ligase 3 OS=Homo sapiens OX=9606 GN=LIG3 PE=1 SV=2	13	13	15	13	112.8	1.055	1.037	0.994	1.156	1.155	1.098	1.123	1.052	1.016	1824.9	1926.2	1892.6	1814.6	2110.3	2107.7	2004.3	2049	1919.2	1853.5	0.309	0.60137	0.958	1.26	0.0519945	0.985
P49917	LIG4	DNA ligase 4 OS=Homo sapiens OX=9606 GN=LIG4 PE=1 SV=2	1	1	1	1	103.9	1.13	1.202	1.248	0.97	1.201	1.073	0.842	1.158	1.601	51.4	58.1	61.8	64.2	49.9	61.8	55.2	43.3	59.5	82.3	-0.844	0.45881	0.948	-0.865	0.448014	0.996
P50135	HNMT	Histamine N-methyltransferase OS=Homo sapiens OX=9606 GN=HNMT PE=1 SV=1	3	1	1	1	33.3	1.12	0.59	1.205	0.897	0.875	0.902	0.601	0.77	1.167	211.2	236.6	124.6	254.6	189.4	184.9	190.6	126.9	162.7	246.5	-1.48	0.29149	0.927	-1.44	0.303399	0.995
P50150	GNG4	Guanine nucleotide-binding protein G(I)/G(S)/G(O) subunit gamma-4 OS=Homo sapiens OX=9606 GN=GNG4 PE=1 SV=1	21	1	1	1	8.4	0.859	1.04	1.337	0.853	1.213	1.226	1.11	0.837	1.179	16.8	14.4	17.5	22.5	14.3	20.4	20.6	18.7	14.1	19.8	-0.0901	0.948891	0.971	0.421	0.765091	0.997
P50213	IDH3A	Isocitrate dehydrogenase [NAD] subunit alpha, mitochondrial OS=Homo sapiens OX=9606 GN=IDH3A PE=1 SV=1	23	9	15	9	39.6	1.082	1.161	0.907	1.111	1.173	1.098	1.089	0.828	0.877	2739.5	2963	3181.2	2485.7	3044	3212.4	3008.9	2984.3	2269	2403.8	-1.14	0.239724	0.915	1.05	0.278496	0.995
P50219	MNX1	Motor neuron and pancreas homeobox protein 1 OS=Homo sapiens OX=9606 GN=MNX1 PE=1 SV=3	2	1	2	1	40.5	0.797	0.788	0.907	0.808	0.701	0.75	0.893	1.037	0.991	286.1	228.2	225.4	259.4	231.1	200.6	214.7	255.5	296.7	283.5	1.25	0.054983	0.734	-0.654	0.282168	0.995
P50238	CRIP1	Cysteine-rich protein 1 OS=Homo sapiens OX=9606 GN=CRIP1 PE=1 SV=3	21	2	2	2	8.5	1.457	0.305	1.102	1.767	1.546	1.07	0.623	0.302	0.123	891.8	1299.2	272.3	982.7	1575.7	1378.5	954.5	555.3	269.7	110.1	-3.71	0.026184	0.552	2.56	0.102697	0.991
P50336	PPOX	Protoporphyrinogen oxidase OS=Homo sapiens OX=9606 GN=PPOX PE=1 SV=1	2	1	1	1	50.7	0.823	1.162	1.019	0.943	0.954	1.1	1.009	0.947	0.947	127.3	104.7	147.9	129.6	120.1	121.5	140.1	128.5	120.6	120.6	-0.349	0.707593	0.963	0.105	0.910343	0.998
P50395	GDI2	Rab GDP dissociation inhibitor beta OS=Homo sapiens OX=9606 GN=GDI2 PE=1 SV=2	43	17	35	12	50.6	1.043	1.203	1.013	1.041	1.079	1.001	0.984	0.94	0.944	3237.7	3377.1	3895.1	3279.4	3369.1	3494.9	3241.5	3185	3043.4	3055.6	-1.4	0.0387878	0.657	-0.19	0.754805	0.997
P50402	EMD	Emerin OS=Homo sapiens OX=9606 GN=EMD PE=1 SV=1	11	2	3	2	29	0.732	0.807	0.862	0.996	0.866	1.035	0.915	1.222	1.168	416.9	305.2	336.3	359.3	415	361.1	431.6	381.4	509.3	486.9	2.63	0.0110369	0.355	1.62	0.0854986	0.99
P50416	CPT1A	Carnitine O-palmitoyltransferase 1, liver isoform OS=Homo sapiens OX=9606 GN=CPT1A PE=1 SV=2	18	13	19	13	88.3	1.116	0.819	0.809	1.147	1.028	1.289	0.891	0.809	0.742	3105.8	3465.4	2543.5	2511.3	3561.3	3192.4	4001.9	2766.6	2511.2	2303.2	-1.1	0.252106	0.918	2.3	0.0294316	0.978
P50454	SERPINH1	Serpin H1 OS=Homo sapiens OX=9606 GN=SERPINH1 PE=1 SV=2	13	5	7	5	46.4	0.978	0.835	1.171	0.979	0.963	0.802	0.779	1.079	1.078	1474.1	1441.8	1230.5	1726.5	1442.7	1419.3	1181.7	1147.7	1591	1589.1	-0.211	0.838889	0.967	-0.819	0.437451	0.996
P50502	ST13	Hsc70-interacting protein OS=Homo sapiens OX=9606 GN=ST13 PE=1 SV=2	25	9	25	9	41.3	1.024	0.856	0.938	0.994	0.858	1.069	0.949	0.923	1.031	3977.9	4075	3403.6	3729.7	3952.5	3415	4252.2	3774.2	3673.3	4099.7	0.0849	0.914194	0.97	0.42	0.596799	0.997
P50542	PEX5	Peroxisomal targeting signal 1 receptor OS=Homo sapiens OX=9606 GN=PEX5 PE=1 SV=3	10	4	4	4	70.8	0.973	0.94	0.981	1.042	0.972	0.91	0.951	1.013	0.98	84.8	82.5	79.7	83.2	88.3	82.4	77.2	80.6	85.9	83.1	0.0846	0.883046	0.969	0.197	0.732856	0.997
P50548	ERF	ETS domain-containing transcription factor ERF OS=Homo sapiens OX=9606 GN=ERF PE=1 SV=2	6	2	2	2	58.7	0.945	0.964	0.959	1.134	0.958	1.002	0.892	0.988	1.036	231.8	219.1	223.5	222.3	262.8	222	232.3	206.7	228.9	240.1	0.0585	0.931018	0.97	1	0.159923	0.993
P50552	VASP	Vasodilator-stimulated phosphoprotein OS=Homo sapiens OX=9606 GN=VASP PE=1 SV=3	23	6	10	6	39.8	1.113	0.789	0.872	0.977	1.31	1.157	0.983	0.858	0.785	471.7	525	372.2	411.3	461.1	617.9	545.9	463.9	404.7	370.5	-0.598	0.567104	0.956	1.99	0.0768827	0.989
P50570	DNM2	Dynamin-2 OS=Homo sapiens OX=9606 GN=DNM2 PE=1 SV=2	19	17	25	9	98	1.006	0.986	0.942	1.033	1.076	1.065	1.086	0.984	0.956	2779.4	2795.8	2740.4	2617.8	2872.3	2990.8	2960	3017.7	2733.8	2656.7	0.303	0.632637	0.96	1.09	0.104735	0.991
P50579	METAP2	Methionine aminopeptidase 2 OS=Homo sapiens OX=9606 GN=METAP2 PE=1 SV=1	11	4	7	4	52.9	1.205	1.063	0.798	1.256	0.926	1.213	1.121	0.726	0.612	799.2	963.3	849.6	638	1003.6	739.8	969.9	896.1	580	489.1	-1.46	0.317134	0.932	0.981	0.495584	0.997
P50583	NUDT2	Bis(5'-nucleosyl)-tetraphosphatase [asymmetrical] OS=Homo sapiens OX=9606 GN=NUDT2 PE=1 SV=3	15	2	2	2	16.8	0.94	1.099	0.901	1.045	1.109	1.019	0.981	0.866	0.886	394.2	370.4	433.3	355.3	411.8	437.1	401.8	386.7	341.3	349.4	-0.7	0.339405	0.935	1.12	0.139169	0.993
P50613	CDK7	Cyclin-dependent kinase 7 OS=Homo sapiens OX=9606 GN=CDK7 PE=1 SV=1	4	1	1	1	39	0.948	1.131	1.258	0.996	1.005	1.176	0.869	1.017	1.125	19.3	18.3	21.8	24.2	19.2	19.4	22.7	16.8	19.6	21.7	-1.06	0.27264	0.923	-0.203	0.828864	0.998
P50616	TOB1	Protein Tob1 OS=Homo sapiens OX=9606 GN=TOB1 PE=1 SV=1	6	2	3	2	38.1	1.343	1.103	0.731	1.061	1.297	1.089	1.15	0.784	0.792	361.3	485.2	398.5	264.3	383.4	468.5	393.5	415.6	283.2	286.2	-1.24	0.375809	0.94	1.06	0.445153	0.996
[truncated: 3,634 more rows]

## Sheet: PC3
Table S2. Relative protein levels in PC-3 cells overexpressing miRNA-23c, miRNA-4328, or a nontarget control sequence (NTC), obtained by LC-MS/MS analysis.
[truncated: 4,817 more rows]
